# Supplementary material for: Genome-wide DNA methylation profile of early-onset endometrial cancer: its correlation with genetic aberrations and comparison with late-onset endometrial cancer
Source: PubMed Central journal article supplement — Carcinogenesis. 2019 Mar 9;40(5):611–23. doi: 10.1093/carcin/bgz046 (PMC6610171; doi:10.1093/carcin/bgz046), 2019-03-09
Supplement: bgz046_suppl_supplementary_table_s1.pdf [file bgz046_suppl_supplementary_table_s1.pdf]

**Supplementary Table 1.** Clinicopathological parameters of patients from whom tissue samples were obtained.

(A) Endometrial cancer tissue (n=81)

| Clinicopathological parameters                                                             | Year, body mass index (BMI) and number of patients |
|--------------------------------------------------------------------------------------------|----------------------------------------------------|
| Patients Age                                                                               |                                                    |
| Median                                                                                     | 44                                                 |
| Interquartile range                                                                        | 23-85                                              |
| BMI                                                                                        |                                                    |
| Median                                                                                     | 21.4                                               |
| Interquartile range                                                                        | 12.7-36.5                                          |
| Histological subtype                                                                       |                                                    |
| Endometrioid endometrial cancer                                                            |                                                    |
| Histological grading <sup>a</sup>                                                          |                                                    |
| G1 to G2                                                                                   | 63                                                 |
| G3                                                                                         | 11                                                 |
| Serous cancer                                                                              | 5                                                  |
| Undifferentiated cancer                                                                    | 1                                                  |
| Neuroendocrine cancer                                                                      | 1                                                  |
| Myometrial Invasion                                                                        |                                                    |
| Less than 1/2                                                                              | 56                                                 |
| 1/2 or more                                                                                | 25                                                 |
| Lymph vessel invasion                                                                      |                                                    |
| Absent                                                                                     | 48                                                 |
| Present                                                                                    | 33                                                 |
| Cervical invasion                                                                          |                                                    |
| Absent                                                                                     | 72                                                 |
| Present                                                                                    | 9                                                  |
| Adnexal invasion                                                                           |                                                    |
| Absent                                                                                     | 74                                                 |
| Present                                                                                    | 7                                                  |
| Lymph node metastasis                                                                      |                                                    |
| Absent                                                                                     | 69                                                 |
| Present                                                                                    | 12                                                 |
| Distant metastasis                                                                         |                                                    |
| Absent                                                                                     | 78                                                 |
| Present                                                                                    | 3                                                  |
| Peritoneal cytology                                                                        |                                                    |
| Negative                                                                                   | 76                                                 |
| Positive                                                                                   | 5                                                  |
| The International Federation of Gynecology and Obstetrics (FIGO) stage (2008) <sup>b</sup> |                                                    |
| I to II                                                                                    | 63                                                 |
| III to IV                                                                                  | 18                                                 |
| Reccurrence                                                                                |                                                    |
| Negative                                                                                   | 72                                                 |
| Positive                                                                                   | 9                                                  |
| Outcome                                                                                    |                                                    |
| Alive or death of other cause                                                              | 79                                                 |
| Death of complication                                                                      | 2                                                  |

<sup>a</sup>Histological grading of endometrial cancer was in accordance with the Tumor-Node-Metastasis classification (Ref.25). <sup>b</sup>FIGO stage was defined according to Ref.26.

(B) Normal control endometrial tissue (n=31)

| Clinicopathological parameters             | Year, BMI and number of patients |
|--------------------------------------------|----------------------------------|
| Patients Age                               |                                  |
| Median                                     | 47                               |
| Interquartile range                        | 33-55                            |
| BMI                                        |                                  |
| Median                                     | 21.3                             |
| Interquartile range                        | 17.7-31.2                        |
| Disease                                    |                                  |
| Uterine leiomyoma                          | 17                               |
| Ovarian cancer                             | 6                                |
| Cervical cancer                            | 6                                |
| Lobular endocervical glandular hyperplasia | 2                                |
