# Supplementary material for: Genome-wide DNA methylation profile of early-onset endometrial cancer: its correlation with genetic aberrations and comparison with late-onset endometrial cancer
Source: PubMed Central journal article supplement — Carcinogenesis. 2019 Mar 9;40(5):611–23. doi: 10.1093/carcin/bgz046 (PMC6610171; doi:10.1093/carcin/bgz046), 2019-03-09
Supplement: bgz046_suppl_supplementary_table_s2.pdf [file bgz046_suppl_supplementary_table_s2.pdf]

Table with multiple columns containing alphanumeric codes, coordinates, and identifiers. The table lists various locations and their corresponding alphanumeric identifiers across multiple columns.
