# Supplementary material for: Genome-wide DNA methylation profile of early-onset endometrial cancer: its correlation with genetic aberrations and comparison with late-onset endometrial cancer
Source: PubMed Central journal article supplement — Carcinogenesis. 2019 Mar 9;40(5):611–23. doi: 10.1093/carcin/bgz046 (PMC6610171; doi:10.1093/carcin/bgz046), 2019-03-09
Supplement: bgz046_suppl_supplementary_table_s3.pdf [file bgz046_suppl_supplementary_table_s3.pdf]

**Supplementary Table 3.** Clinicopathological parameters of patients with early-onset endometrioid endometrial cancer (EE) (aged <40 yr) and late-onset endometrioid endometrial cancer (LE).

| Clinicopathological parameters                                                             | Year, body mass index (BMI) and number of patients |           | P value <sup>c</sup>          |
|--------------------------------------------------------------------------------------------|----------------------------------------------------|-----------|-------------------------------|
|                                                                                            | EE (n=34)                                          | LE (n=40) |                               |
| Patients Age                                                                               |                                                    |           |                               |
| Median                                                                                     | 36                                                 | 55        | <u>1.56×10<sup>-13d</sup></u> |
| Interquartile range                                                                        | 23-40                                              | 42-77     |                               |
| BMI                                                                                        |                                                    |           |                               |
| Median                                                                                     | 21.9                                               | 22.5      | 0.99 <sup>d</sup>             |
| Interquartile range                                                                        | 14.8-36.5                                          | 12.7-32.0 |                               |
| Histological grading <sup>a</sup>                                                          |                                                    |           |                               |
| G1 to G2                                                                                   | 28                                                 | 35        | 0.75 <sup>e</sup>             |
| G3                                                                                         | 6                                                  | 5         |                               |
| Myometrial invasion                                                                        |                                                    |           |                               |
| Less than 1/2                                                                              | 29                                                 | 24        | <u>0.02<sup>e</sup></u>       |
| 1/2 or more                                                                                | 5                                                  | 16        |                               |
| Lymph vessel invasion                                                                      |                                                    |           |                               |
| Absent                                                                                     | 22                                                 | 22        | 0.48 <sup>e</sup>             |
| Present                                                                                    | 12                                                 | 18        |                               |
| Cervical invasion                                                                          |                                                    |           |                               |
| Absent                                                                                     | 28                                                 | 38        | 0.13 <sup>e</sup>             |
| Present                                                                                    | 6                                                  | 2         |                               |
| Adnexal invasion                                                                           |                                                    |           |                               |
| Absent                                                                                     | 30                                                 | 38        | 0.40 <sup>e</sup>             |
| Present                                                                                    | 4                                                  | 2         |                               |
| Lymph node metastasis                                                                      |                                                    |           |                               |
| Absent                                                                                     | 29                                                 | 36        | 0.72 <sup>e</sup>             |
| Present                                                                                    | 5                                                  | 4         |                               |
| Distant metastasis                                                                         |                                                    |           |                               |
| Absent                                                                                     | 33                                                 | 39        | 1.00 <sup>e</sup>             |
| Present                                                                                    | 1                                                  | 1         |                               |
| Peritoneal cytology                                                                        |                                                    |           |                               |
| Negative                                                                                   | 31                                                 | 39        | 0.33 <sup>e</sup>             |
| Positive                                                                                   | 3                                                  | 1         |                               |
| The International Federation of Gynecology and Obstetrics (FIGO) stage (2008) <sup>b</sup> |                                                    |           |                               |
| I to II                                                                                    | 27                                                 | 35        | 0.37 <sup>e</sup>             |
| III to IV                                                                                  | 7                                                  | 5         |                               |
| Reccurrence                                                                                |                                                    |           |                               |
| Negative                                                                                   | 33                                                 | 36        | 0.62 <sup>e</sup>             |
| Positive                                                                                   | 1                                                  | 3         |                               |
| Outcome                                                                                    |                                                    |           |                               |
| Alive or death of other cause                                                              | 0                                                  | 1         | 1.00 <sup>e</sup>             |
| Death of complication                                                                      | 34                                                 | 39        |                               |

<sup>a</sup>Histological grading of endometrial cancer was in accordance with the Tumor-Node-Metastasis classification (Ref.25).

<sup>b</sup>FIGO stage was defined according to Ref.26.

<sup>c</sup>P values of <0.05 are underlined.

<sup>d</sup>Mann-Whitney U test.

<sup>e</sup>Fisher's exact test.
