# Supplementary material for: Genome-wide DNA methylation profile of early-onset endometrial cancer: its correlation with genetic aberrations and comparison with late-onset endometrial cancer
Source: PubMed Central journal article supplement — Carcinogenesis. 2019 Mar 9;40(5):611–23. doi: 10.1093/carcin/bgz046 (PMC6610171; doi:10.1093/carcin/bgz046), 2019-03-09
Supplement: bgz046_suppl_supplementary_table_s4.pdf [file bgz046_suppl_supplementary_table_s4.pdf]

**Supplementary Table 4.** The 1,034 probes showing significant differences in DNA methylation levels between 34 samples of early-onset endometrioid endometrial cancer tissue (EE) (patient age <40 yr) and 40 samples of late-onset endometrioid endometrial cancer tissue (LE) (Welch's t test  $P < 0.01$  and  $\Delta\beta_{LE-EE}$  value of more than 0.25 or less than -0.25).

| Target ID <sup>a</sup> | Chromosome | Position <sup>b</sup> | Gene symbol <sup>c</sup>    | Gene region <sup>d</sup>   |
|------------------------|------------|-----------------------|-----------------------------|----------------------------|
| cg00002719             | 1          | 169,396,706           | <i>CCDC181</i>              | Gene body/5'UTR/1st exon   |
| cg00003298             | 12         | 113,901,210           | <i>LHX5*</i>                | Gene body                  |
| cg00009292             | 1          | 50,882,082            | <i>N/A</i>                  |                            |
| cg00015770             | 4          | 122,302,007           | <i>QRFPR</i>                | Gene body/5'UTR/1st exon   |
| cg00020052             | 2          | 68,546,899            | <i>CNRIP1</i> <sup>†</sup>  | Gene body/5'UTR/1st exon   |
| cg00023185             | 8          | 65,489,939            | <i>LOC401463</i>            | TSS200                     |
| cg00046625             | 1          | 66,258,760            | <i>PDE4B</i>                | TSS200                     |
| cg00100121             | 1          | 169,396,635           | <i>CCDC181</i>              | Gene body/5'UTR/1st exon   |
| cg00142106             | 6          | 29,760,769            | <i>HCG4</i>                 | Gene body/1st exon         |
| cg00158528             | 7          | 121,956,859           | <i>N/A</i>                  |                            |
| cg00196827             | 18         | 55,108,068            | <i>ONECUT2*</i>             | Gene body/1st intron       |
| cg00246409             | 5          | 43,874,085            | <i>N/A</i>                  |                            |
| cg00262195             | 19         | 36,561,453            | <i>WDR62</i> <sup>†</sup>   | Gene body                  |
| cg00272200             | 5          | 44,388,972            | <i>FGF10-AS1</i>            | Gene body/1st exon         |
| cg00287312             | 13         | 53,420,425            | <i>PCDH8</i> <sup>†</sup>   | Gene body/1st exon         |
| cg00295572             | 1          | 3,568,236             | <i>TP73*</i>                | TSS1500                    |
| cg00333512             | 8          | 25,909,599            | <i>N/A</i>                  |                            |
| cg00384539             | 8          | 70,983,567            | <i>PRDM14*</i>              | TSS200                     |
| cg00397673             | 18         | 56,940,418            | <i>RAX*</i>                 | Gene body/1st exon         |
| cg00465841             | 8          | 65,494,451            | <i>BHLHE22*</i>             | Gene body/1st exon         |
| cg00480264             | 8          | 57,026,542            | <i>MOS</i>                  | TSS200                     |
| cg00501272             | 6          | 29,760,505            | <i>HCG4</i>                 | Gene body/1st exon         |
| cg00527489             | 1          | 214,360,954           | <i>N/A</i>                  |                            |
| cg00530925             | 10         | 23,463,094            | <i>N/A</i>                  |                            |
| cg00565688             | 1          | 3,568,212             | <i>TP73*</i>                | TSS1500                    |
| cg00580978             | 12         | 72,667,386            | <i>TRHDE-AS1</i>            | TSS200                     |
| cg00593536             | 2          | 139,538,222           | <i>NXPH2</i> <sup>†</sup>   | TSS1500                    |
| cg00594011             | 4          | 107,956,556           | <i>DKK2</i>                 | Gene body/1st exon         |
| cg00608276             | 19         | 54,926,424            | <i>TTYHI</i>                | TSS200                     |
| cg00665492             | 3          | 164,914,575           | <i>SLITRK3</i> <sup>†</sup> | Gene body/5'UTR/1st exon   |
| cg00690148             | 2          | 119,916,017           | <i>C1QL2</i>                | Gene body/5'UTR/1st exon   |
| cg00701692             | 10         | 134,599,854           | <i>NKX6-2*</i>              | TSS1500                    |
| cg00708105             | 12         | 101,110,754           | <i>N/A</i>                  |                            |
| cg00733780             | 10         | 26,505,127            | <i>GAD2</i>                 | TSS200                     |
| cg00778995             | 2          | 105,470,558           | <i>POU3F3*</i>              | Gene body/5'UTR/1st exon   |
| cg00829961             | 8          | 25,909,326            | <i>N/A</i>                  |                            |
| cg00912625             | 3          | 2,140,977             | <i>CNTN4</i> <sup>†</sup>   | Gene body/5'UTR/1st intron |
| cg00924004             | 8          | 65,490,710            | <i>LOC401463</i>            | TSS1500                    |
| cg00939495             | 4          | 9,783,398             | <i>DRD5</i>                 | Gene body/5'UTR/1st exon   |
| cg00945234             | 1          | 50,886,411            | <i>DMRTA2</i>               | Gene body                  |
| cg00949869             | 2          | 233,351,527           | <i>ECEL1</i>                | Gene body/5'UTR/1st intron |
| cg00953355             | 17         | 70,114,129            | <i>SOX9-AS1</i>             | Gene body/1st intron       |
| cg01030121             | 12         | 72,667,236            | <i>TRHDE-AS1</i>            | Gene body/1st exon         |
| cg01030534             | 7          | 143,579,698           | <i>TCAF1</i>                | Gene body/5'UTR/1st intron |
| cg01085837             | 12         | 22,094,461            | <i>N/A</i>                  |                            |
| cg01149641             | 10         | 1,779,686             | <i>ADARB2</i>               | TSS200                     |
| cg01160692             | 17         | 1,959,620             | <i>HIC1*</i>                | Gene body/1st exon         |
| cg01162037             | 19         | 54,926,623            | <i>TTYHI</i>                | Gene body/5'UTR/1st exon   |
| cg01200640             | 8          | 687,384               | <i>DLGAP2</i> <sup>†</sup>  | TSS1500                    |
| cg01283246             | 5          | 135,266,135           | <i>FBXL21</i>               | Gene body/5'UTR/1st exon   |
| cg01295203             | 8          | 70,984,199            | <i>PRDM14*</i>              | TSS1500                    |
| cg01384488             | 10         | 134,599,809           | <i>NKX6-2*</i>              | TSS1500                    |
| cg01419567             | 8          | 77,594,595            | <i>ZFH4-AS1</i>             | Gene body/1st intron       |
| cg01419831             | 2          | 162,283,705           | <i>N/A</i>                  |                            |
| cg01463154             | 8          | 65,491,938            | <i>BHLHE22*</i>             | TSS1500                    |
| cg01510609             | 2          | 3,751,134             | <i>DCDC2C</i>               | TSS200                     |
| cg01518607             | 6          | 27,235,891            | <i>N/A</i>                  |                            |
| cg01529637             | 20         | 50,721,911            | <i>ZFP64</i>                | Gene body/5'UTR/1st exon   |
| cg01587682             | 11         | 31,820,572            | <i>PAX6*</i>                | Gene body                  |
| cg01588748             | 12         | 79,258,386            | <i>SYT1</i>                 | TSS200                     |

|            |    |             |                             |                            |
|------------|----|-------------|-----------------------------|----------------------------|
| cg01614020 | 8  | 24,814,137  | <i>NEFL</i> <sup>†</sup>    | Gene body/5'UTR/1st exon   |
| cg01627847 | 17 | 43,339,512  | <i>SPATA32</i> <sup>†</sup> | TSS200                     |
| cg01642521 | 11 | 20,618,250  | <i>N/A</i>                  |                            |
| cg01642653 | 11 | 27,743,476  | <i>BDNF</i>                 | Gene body/5'UTR/1st exon   |
| cg01670677 | 11 | 71,955,322  | <i>PHOX2A</i> *             | TSS200                     |
| cg01699217 | 20 | 61,638,488  | <i>BHLHE23</i> <sup>†</sup> | TSS200                     |
| cg01707818 | 6  | 123,317,184 | <i>CLVS2</i>                | Gene body/5'UTR/1st exon   |
| cg01717727 | 5  | 5,140,406   | <i>ADAMTS16</i>             | TSS200                     |
| cg01736784 | 11 | 125,774,092 | <i>DDX25</i> <sup>†</sup>   | TSS200                     |
| cg01739661 | 3  | 121,903,111 | <i>CASR</i>                 | TSS200                     |
| cg01743841 | 20 | 61,992,494  | <i>CHRNA4</i>               | Gene body/5'UTR/1st intron |
| cg01763410 | 18 | 31,020,209  | <i>CCDC178</i>              | TSS200                     |
| cg01828753 | 6  | 99,272,871  | <i>N/A</i>                  |                            |
| cg01869243 | 2  | 233,350,363 | <i>ECEL1</i>                | Gene body                  |
| cg01893212 | 7  | 49,813,088  | <i>VWC2</i>                 | TSS200                     |
| cg01915516 | 1  | 3,568,243   | <i>TP73</i> *               | TSS1500                    |
| cg01923218 | 11 | 93,063,888  | <i>DEUP1</i>                | Gene body/5'UTR/1st exon   |
| cg01939477 | 11 | 43,602,879  | <i>MIR129-2</i>             | TSS200                     |
| cg01959236 | 19 | 9,517,985   | <i>N/A</i>                  |                            |
| cg01978558 | 8  | 93,114,437  | <i>RUNX1T1</i> *            | Gene body/5'UTR/1st intron |
| cg01981252 | 6  | 150,286,646 | <i>ULBP1</i>                | Gene body/1st intron       |
| cg01991397 | 18 | 5,197,333   | <i>AKAIN1</i> <sup>†</sup>  | TSS200                     |
| cg02026062 | 6  | 117,086,479 | <i>FAM162B</i>              | Gene body/1st intron       |
| cg02027945 | 11 | 20,618,230  | <i>N/A</i>                  |                            |
| cg02065637 | 20 | 61,809,035  | <i>MIR124-3</i>             | TSS1500                    |
| cg02066409 | 8  | 11,059,042  | <i>XKR6</i>                 | TSS200                     |
| cg02081701 | 2  | 139,537,197 | <i>NXP2</i> <sup>†</sup>    | Gene body/1st intron       |
| cg02172150 | 7  | 70,597,774  | <i>GALNT17</i>              | Gene body/5'UTR/1st exon   |
| cg02182795 | 8  | 57,069,688  | <i>N/A</i>                  |                            |
| cg02216246 | 11 | 128,564,756 | <i>FLII</i> *               | Gene body/5'UTR/1st intron |
| cg02232208 | 3  | 147,137,147 | <i>N/A</i>                  |                            |
| cg02245020 | 7  | 143,580,147 | <i>TCAF1</i>                | Gene body/5'UTR/1st intron |
| cg02306630 | 10 | 134,600,477 | <i>NKX6-2</i> *             | TSS1500                    |
| cg02340083 | 1  | 50,882,006  | <i>N/A</i>                  |                            |
| cg02344833 | 19 | 58,545,285  | <i>ZSCAN1</i> <sup>†</sup>  | TSS200                     |
| cg02348751 | 4  | 183,064,035 | <i>LOC90768</i>             | Gene body                  |
| cg02381898 | 4  | 54,970,175  | <i>N/A</i>                  |                            |
| cg02386159 | 7  | 22,589,427  | <i>N/A</i>                  |                            |
| cg02432280 | 7  | 152,622,368 | <i>N/A</i>                  |                            |
| cg02440668 | 17 | 77,721,989  | <i>N/A</i>                  |                            |
| cg02442509 | 2  | 45,156,207  | <i>LINC01833</i>            | Gene body/1st intron       |
| cg02467990 | 7  | 49,813,102  | <i>VWC2</i>                 | TSS200                     |
| cg02471897 | 7  | 1,281,200   | <i>N/A</i>                  |                            |
| cg02487767 | 7  | 27,282,925  | <i>EVX1</i> *               | Gene body/5'UTR/1st exon   |
| cg02510267 | 11 | 20,690,807  | <i>NELLI</i> <sup>†</sup>   | TSS1500                    |
| cg02595832 | 10 | 129,535,786 | <i>FOXI2</i> *              | Gene body/1st exon         |
| cg02609127 | 14 | 102,026,258 | <i>DIO3</i>                 | TSS1500                    |
| cg02610222 | 4  | 147,560,282 | <i>POU4F2</i> *             | Gene body/5'UTR/1st exon   |
| cg02670123 | 2  | 173,330,395 | <i>ITGA6</i>                | Gene body                  |
| cg02712811 | 14 | 38,677,155  | <i>SSTR1</i>                | TSS200                     |
| cg02736099 | 3  | 137,483,821 | <i>SOX14</i> *              | Gene body/1st exon         |
| cg02745211 | 3  | 132,757,106 | <i>TMEM108</i>              | TSS200                     |
| cg02779870 | 8  | 72,755,205  | <i>MSC-ASI</i>              | TSS200                     |
| cg02830545 | 8  | 15,094,487  | <i>SGCZ</i> <sup>†</sup>    | Gene body/5'UTR/1st intron |
| cg02858594 | 21 | 34,400,211  | <i>OLIG2</i> *              | Gene body/3'UTR            |
| cg02899206 | 10 | 1,779,835   | <i>ADARB2</i>               | TSS200                     |
| cg02919936 | 8  | 70,982,285  | <i>PRDM14</i> *             | Gene body/5'UTR/1st intron |
| cg02980596 | 5  | 50,265,450  | <i>LINC02106</i>            | Gene body/1st intron       |
| cg03030717 | 12 | 65,218,069  | <i>TBC1D30</i>              | TSS1500                    |
| cg03032214 | 18 | 74,961,809  | <i>GALR1</i>                | TSS200                     |
| cg03048083 | 17 | 43,339,497  | <i>SPATA32</i> <sup>†</sup> | TSS200                     |
| cg03132773 | 16 | 22,824,877  | <i>HS3ST2</i>               | TSS1500                    |
| cg03146993 | 17 | 35,297,146  | <i>LHX1</i> *               | Gene body/1st intron       |
| cg03151187 | 18 | 35,146,770  | <i>CELF4</i> <sup>†</sup>   | TSS1500                    |
| cg03152033 | 18 | 4,453,856   | <i>DLGAP1</i> <sup>†</sup>  | Gene body/5'UTR/1st intron |
| cg03166753 | 6  | 38,683,221  | <i>DNAH8</i> <sup>†</sup>   | Gene body/5'UTR/1st intron |

|            |    |             |                             |                            |
|------------|----|-------------|-----------------------------|----------------------------|
| cg03167496 | 11 | 27,743,619  | <i>BDNF</i>                 | TSS200                     |
| cg03205584 | 12 | 79,258,407  | <i>SYT1</i>                 | TSS200                     |
| cg03209854 | 5  | 5,140,003   | <i>CTD-2297D10.2</i>        | Gene body/1st intron       |
| cg03225210 | 7  | 143,579,951 | <i>TCAF1</i>                | Gene body/5'UTR/1st intron |
| cg03278146 | 18 | 5,197,327   | <i>AKAIN1</i> <sup>†</sup>  | TSS200                     |
| cg03304610 | 4  | 172,734,276 | <i>GALNTL6</i>              | TSS1500                    |
| cg03358769 | 3  | 157,261,021 | <i>PQLC2L</i>               | TSS200                     |
| cg03403065 | 20 | 41,818,358  | <i>PTPRT</i>                | Gene body/1st exon         |
| cg03430846 | 8  | 31,497,082  | <i>NRG1</i>                 | TSS200                     |
| cg03502002 | 18 | 74,962,133  | <i>GALR1</i>                | Gene body/5'UTR/1st exon   |
| cg03514545 | 1  | 114,696,698 | <i>SYT6</i>                 | TSS1500                    |
| cg03561455 | 18 | 70,210,433  | <i>CBLN2</i>                | Gene body/5'UTR            |
| cg03561773 | 4  | 147,559,699 | <i>POU4F2*</i>              | TSS1500                    |
| cg03629943 | 10 | 101,089,149 | <i>CNNM1</i>                | Gene body/1st exon         |
| cg03655683 | 2  | 63,281,383  | <i>OTX1*</i>                | Gene body                  |
| cg03659519 | 18 | 74,961,966  | <i>GALR1</i>                | TSS200                     |
| cg03660115 | 3  | 87,138,400  | <i>LINC00506</i>            | TSS200                     |
| cg03663462 | 18 | 76,734,764  | <i>N/A</i>                  |                            |
| cg03721993 | 14 | 102,026,722 | <i>MIR1247</i>              | Gene body/1st exon         |
| cg03735888 | 19 | 58,951,602  | <i>ZNF132*</i>              | TSS200                     |
| cg03749016 | 8  | 23,564,591  | <i>NKX2-6*</i>              | TSS1500                    |
| cg03757784 | 16 | 22,826,113  | <i>HS3ST2</i>               | Gene body/1st exon         |
| cg03850426 | 13 | 53,422,860  | <i>PCDH8</i> <sup>†</sup>   | TSS200                     |
| cg03855575 | 18 | 31,020,216  | <i>CCDC178</i>              | TSS200                     |
| cg03876413 | 7  | 32,338,240  | <i>PDE1C</i>                | Gene body/1st intron       |
| cg03905847 | 10 | 134,599,934 | <i>NKX6-2*</i>              | TSS1500                    |
| cg03951219 | 1  | 159,141,440 | <i>CADM3</i> <sup>†</sup>   | Gene body/5'UTR/1st exon   |
| cg03970036 | 2  | 220,174,232 | <i>PTPRN</i>                | Gene body/5'UTR/1st exon   |
| cg03976877 | 7  | 158,937,610 | <i>VIPR2</i>                | Gene body/5'UTR/1st exon   |
| cg03994318 | 13 | 109,147,921 | <i>N/A</i>                  |                            |
| cg04008252 | 4  | 72,897,782  | <i>NPFRR2</i>               | Gene body/1st exon         |
| cg04023150 | 1  | 44,873,064  | <i>RNF220</i> <sup>†</sup>  | Gene body/5'UTR/1st intron |
| cg04030486 | 17 | 6,358,599   | <i>PITPNM3</i>              | Gene body/3'UTR            |
| cg04052466 | 19 | 2,251,061   | <i>AMH</i>                  | Gene body                  |
| cg04066019 | 3  | 16,554,466  | <i>RFTN1</i>                | Gene body/5'UTR/1st intron |
| cg04067139 | 11 | 58,673,167  | <i>GLYATL1</i>              | Gene body/5'UTR/1st intron |
| cg04136610 | 5  | 5,139,878   | <i>CTD-2297D10.2</i>        | Gene body/1st intron       |
| cg04235126 | 12 | 3,600,216   | <i>PRMT8</i>                | TSS200                     |
| cg04237663 | 8  | 110,987,019 | <i>KCNV1</i>                | Gene body/5'UTR            |
| cg04290346 | 11 | 20,177,852  | <i>DBX1</i> <sup>†</sup>    | Gene body                  |
| cg04399751 | 1  | 171,810,376 | <i>DNM3</i> <sup>†</sup>    | TSS1500                    |
| cg04454951 | 7  | 49,813,031  | <i>VWC2</i>                 | TSS1500                    |
| cg04506894 | 18 | 56,940,665  | <i>RAX*</i>                 | TSS200                     |
| cg04515996 | 6  | 85,474,028  | <i>TBX18*</i>               | TSS200                     |
| cg04541474 | 1  | 44,873,592  | <i>RNF220</i> <sup>†</sup>  | Gene body/5'UTR/1st intron |
| cg04550737 | 1  | 119,530,600 | <i>TBX15*</i>               | TSS200                     |
| cg04555373 | 8  | 31,497,042  | <i>NRG1</i>                 | TSS1500                    |
| cg04569082 | 12 | 127,940,323 | <i>N/A</i>                  |                            |
| cg04572695 | 6  | 100,441,722 | <i>MCHR2-ASI</i>            | TSS200                     |
| cg04623955 | 14 | 102,026,376 | <i>DIO3</i>                 | TSS1500                    |
| cg04654530 | 2  | 63,282,702  | <i>OTX1*</i>                | Gene body                  |
| cg04657224 | 8  | 11,059,038  | <i>XKR6</i>                 | TSS200                     |
| cg04697148 | 7  | 24,325,079  | <i>NPY</i>                  | Gene body                  |
| cg04700283 | 14 | 97,685,386  | <i>N/A</i>                  |                            |
| cg04747226 | 11 | 105,481,319 | <i>GRIA4</i>                | TSS200                     |
| cg04760071 | 6  | 38,682,982  | <i>DNAH8</i> <sup>†</sup>   | TSS200                     |
| cg04763554 | 1  | 98,511,258  | <i>MIR2682</i>              | TSS1500                    |
| cg04773818 | 8  | 31,496,966  | <i>NRG1</i>                 | TSS1500                    |
| cg04813832 | 1  | 63,790,234  | <i>FOXD3-ASI</i>            | TSS200                     |
| cg04842146 | 8  | 85,097,056  | <i>RALYL</i> <sup>†</sup>   | Gene body/5'UTR/1st exon   |
| cg04851712 | 12 | 101,110,871 | <i>N/A</i>                  |                            |
| cg04904331 | 7  | 49,813,033  | <i>VWC2</i>                 | TSS1500                    |
| cg04945331 | 3  | 137,483,992 | <i>SOX14*</i>               | Gene body/1st exon         |
| cg04950301 | 6  | 12,750,392  | <i>PHACTR1</i> <sup>†</sup> | Gene body                  |
| cg04961466 | 4  | 164,264,985 | <i>NPY5R</i>                | TSS200                     |
| cg04991805 | 10 | 99,790,910  | <i>CRTAC1</i> <sup>†</sup>  | TSS1500                    |

|             |    |             |                           |                            |
|-------------|----|-------------|---------------------------|----------------------------|
| cg05041351  | 16 | 1,922,149   | <i>MEIOB</i>              | Gene body/5'UTR/1st exon   |
| cg05052969  | 1  | 214,156,842 | <i>PROX1-AS1</i>          | Gene body/1st intron       |
| cg05075118  | 3  | 132,756,991 | <i>TMEM108</i>            | TSS200                     |
| cg05099508  | 10 | 22,634,432  | <i>SPAG6</i> <sup>†</sup> | Gene body/5'UTR/1st exon   |
| cg05141578  | 10 | 104,306,658 | <i>SUFU</i> <sup>†</sup>  | Gene body                  |
| cg05158615  | 7  | 24,323,559  | <i>NPY</i>                | TSS1500                    |
| cg05180443  | 17 | 48,546,554  | <i>CHAD</i> <sup>†</sup>  | TSS1500                    |
| cg05241015  | 2  | 1,748,876   | <i>PXDN</i>               | TSS1500                    |
| cg05302386  | 14 | 52,734,525  | <i>PTGDR</i>              | Gene body/5'UTR/1st exon   |
| cg05306070  | 21 | 45,770,298  | <i>N/A</i>                |                            |
| cg05309948  | 11 | 2,292,447   | <i>ASCL2</i> *            | TSS1500                    |
| cg05332960  | 18 | 31,020,418  | <i>CCDC178</i>            | Gene body/5'UTR/1st intron |
| cg053344021 | 12 | 65,218,019  | <i>TBC1D30</i>            | TSS1500                    |
| cg05345154  | 19 | 2,250,901   | <i>AMH</i>                | Gene body                  |
| cg05376374  | 11 | 43,602,920  | <i>MIR129-2</i>           | TSS200                     |
| cg05447008  | 6  | 73,331,114  | <i>KCNQ5</i>              | TSS1500                    |
| cg05518705  | 2  | 1,748,675   | <i>PXDN</i>               | TSS1500                    |
| cg05523911  | 1  | 152,081,002 | <i>TCHH</i> <sup>†</sup>  | Gene body                  |
| cg05604079  | 4  | 122,302,268 | <i>QRFR</i>               | TSS200                     |
| cg05640431  | 4  | 121,992,398 | <i>NDNF</i> <sup>†</sup>  | Gene body/5'UTR/1st intron |
| cg05707244  | 8  | 31,496,782  | <i>NRG1</i>               | TSS1500                    |
| cg05719164  | 1  | 180,204,221 | <i>LHX4</i> *             | Gene body/1st intron       |
| cg05756220  | 11 | 30,038,685  | <i>KCNA4</i>              | TSS200                     |
| cg05766140  | 6  | 391,743     | <i>IRF4</i> *             | Gene body/1st exon         |
| cg05901579  | 15 | 88,800,567  | <i>NTRK3</i>              | TSS1500                    |
| cg05904135  | 10 | 134,599,372 | <i>NKX6-2</i> *           | Gene body/1st exon         |
| cg05945059  | 18 | 56,940,463  | <i>RAX</i> *              | Gene body/5'UTR/1st exon   |
| cg05994094  | 18 | 31,020,806  | <i>CCDC178</i>            | TSS200                     |
| cg06003986  | 18 | 35,104,868  | <i>CELF4</i> <sup>†</sup> | Gene body/1st intron       |
| cg06039355  | 10 | 118,032,033 | <i>GFRA1</i>              | Gene body/5'UTR/1st intron |
| cg06048524  | 10 | 44,880,542  | <i>CXCL12</i>             | Gene body/5'UTR/1st exon   |
| cg06102330  | 8  | 72,756,932  | <i>MSC</i>                | TSS1500                    |
| cg06103031  | 18 | 35,146,766  | <i>CELF4</i> <sup>†</sup> | TSS1500                    |
| cg06184669  | 4  | 47,034,267  | <i>GABRB1</i>             | Gene body                  |
| cg06263495  | 11 | 2,292,004   | <i>ASCL2</i> *            | Gene body/5'UTR/1st exon   |
| cg06269753  | 8  | 72,755,871  | <i>MSC-AS1</i>            | TSS1500                    |
| cg06277657  | 7  | 137,532,374 | <i>DGKI</i>               | TSS1500                    |
| cg06298519  | 10 | 118,031,864 | <i>GFRA1</i>              | TSS200                     |
| cg06327407  | 20 | 2,781,399   | <i>CPXMI</i>              | TSS200                     |
| cg06333957  | 20 | 50,721,551  | <i>ZFP64</i>              | Gene body/1st intron       |
| cg06355683  | 20 | 50,721,425  | <i>ZFP64</i>              | Gene body/1st intron       |
| cg06365161  | 16 | 22,825,345  | <i>HS3ST2</i>             | TSS1500                    |
| cg06392169  | 6  | 391,936     | <i>IRF4</i> *             | Gene body/1st intron       |
| cg06401021  | 6  | 55,443,868  | <i>HMGCLL1</i>            | Gene body/5'UTR/1st exon   |
| cg06425919  | 11 | 17,741,925  | <i>MYOD1</i> *            | Gene body/1st exon         |
| cg06463958  | 6  | 166,582,393 | <i>T</i> *                | TSS1500                    |
| cg06470822  | 6  | 28,175,283  | <i>N/A</i>                |                            |
| cg06481168  | 4  | 165,878,055 | <i>FAM218A</i>            | TSS200                     |
| cg06484415  | 13 | 28,371,000  | <i>N/A</i>                |                            |
| cg06500337  | 6  | 161,100,242 | <i>N/A</i>                |                            |
| cg06523224  | 15 | 83,953,883  | <i>BNC1</i> *             | TSS1500                    |
| cg06539804  | 20 | 2,781,489   | <i>CPXMI</i>              | TSS200                     |
| cg06598836  | 3  | 2,140,699   | <i>CNTN4</i> <sup>†</sup> | Gene body/5'UTR/1st intron |
| cg06624337  | 15 | 47,477,411  | <i>SEMA6D</i>             | Gene body/5'UTR/1st intron |
| cg06648277  | 10 | 134,600,489 | <i>NKX6-2</i> *           | TSS1500                    |
| cg06666008  | 11 | 31,819,464  | <i>PAX6</i> *             | Gene body                  |
| cg06733794  | 10 | 123,922,970 | <i>TACC2</i> <sup>†</sup> | Gene body/5'UTR/1st exon   |
| cg06761921  | 18 | 35,145,535  | <i>CELF4</i> <sup>†</sup> | Gene body/1st exon         |
| cg06765217  | 14 | 38,091,644  | <i>TTC6</i> <sup>†</sup>  | Gene body                  |
| cg06816106  | 2  | 29,033,352  | <i>SPDYA</i> <sup>†</sup> | TSS1500                    |
| cg06827247  | 3  | 157,261,086 | <i>PQLC2L</i>             | TSS200                     |
| cg06873806  | 8  | 65,492,792  | <i>BHLHE22</i> *          | TSS200                     |
| cg06874656  | 11 | 131,780,353 | <i>NTM</i> <sup>†</sup>   | TSS1500                    |
| cg06954658  | 18 | 76,740,093  | <i>SALL3</i> *            | TSS200                     |
| cg06962177  | 1  | 63,785,946  | <i>N/A</i>                |                            |
| cg06966660  | 10 | 123,923,066 | <i>TACC2</i> <sup>†</sup> | Gene body/5'UTR/1st exon   |

|            |    |             |                             |                            |
|------------|----|-------------|-----------------------------|----------------------------|
| cg07025949 | 10 | 1,778,844   | <i>ADARB2</i>               | Gene body/1st intron       |
| cg07044013 | 11 | 20,618,651  | <i>N/A</i>                  |                            |
| cg07080358 | 2  | 68,546,507  | <i>CNRIP1</i> <sup>†</sup>  | Gene body/1st exon         |
| cg07099331 | 10 | 102,419,617 | <i>N/A</i>                  |                            |
| cg07113642 | 20 | 2,781,262   | <i>CPXMI</i>                | Gene body/5'UTR/1st exon   |
| cg07124117 | 11 | 31,827,775  | <i>PAX6</i> *               | Gene body                  |
| cg07135732 | 1  | 91,184,290  | <i>BARHL2</i> *             | TSS1500                    |
| cg07143083 | 7  | 70,597,921  | <i>GALNT17</i>              | Gene body/1st exon         |
| cg07149609 | 1  | 170,630,734 | <i>N/A</i>                  |                            |
| cg07180307 | 11 | 109,294,168 | <i>C11orf87</i>             | Gene body/5'UTR            |
| cg07224726 | 5  | 115,298,511 | <i>LVRN</i>                 | Gene body/1st exon         |
| cg07239363 | 19 | 54,926,434  | <i>TTYHI</i>                | TSS200                     |
| cg07243038 | 19 | 44,952,801  | <i>ZNF229</i> <sup>†</sup>  | TSS200                     |
| cg07283114 | 8  | 65,489,065  | <i>LOC401463</i>            | Gene body                  |
| cg07283281 | 1  | 114,696,646 | <i>SYT6</i>                 | TSS200                     |
| cg07349208 | 4  | 111,532,679 | <i>PANCR</i>                | Gene body/1st intron       |
| cg07350470 | 4  | 4,765,329   | <i>LOC101928279</i>         | Gene body/1st intron       |
| cg07382554 | 18 | 76,740,101  | <i>SALL3</i> *              | TSS200                     |
| cg07402669 | 20 | 57,090,015  | <i>APCDD1L</i>              | TSS200                     |
| cg07419704 | 4  | 1,398,139   | <i>NKX1-1</i>               | Gene body/1st intron       |
| cg07430214 | 3  | 172,166,300 | <i>GHSR</i>                 | TSS200                     |
| cg07434271 | 11 | 31,840,698  | <i>PAX6</i> *               | TSS1500                    |
| cg07434402 | 11 | 84,431,535  | <i>DLG2</i> <sup>†</sup>    | Gene body/5'UTR/1st exon   |
| cg07509511 | 2  | 65,297,852  | <i>CEP68</i>                | Gene body                  |
| cg07520506 | 12 | 7,593,007   | <i>CD163L1</i>              | Gene body                  |
| cg07536910 | 2  | 176,948,105 | <i>EVX2</i> *               | Gene body/1st exon         |
| cg07585185 | 7  | 103,969,682 | <i>LHFPL3</i>               | Gene body/1st intron       |
| cg07603330 | 11 | 91,957,992  | <i>N/A</i>                  |                            |
| cg07629454 | 3  | 121,903,520 | <i>CASR</i>                 | Gene body/5'UTR/1st intron |
| cg07676859 | 20 | 23,015,932  | <i>SSTR4</i>                | TSS200                     |
| cg07690181 | 5  | 83,679,643  | <i>EDIL3</i>                | Gene body/1st intron       |
| cg07696699 | 4  | 17,783,502  | <i>FAM184B</i>              | TSS1500                    |
| cg07712493 | 5  | 115,151,427 | <i>CDO1</i> <sup>†</sup>    | Gene body/1st intron       |
| cg07719492 | 8  | 70,983,348  | <i>PRDM14</i> *             | Gene body/5'UTR/1st intron |
| cg07773116 | 10 | 48,438,500  | <i>GDF10</i>                | Gene body/1st exon         |
| cg07808555 | 1  | 111,217,712 | <i>KCNA3</i>                | TSS200                     |
| cg07813249 | 4  | 46,392,253  | <i>GABRA2</i>               | TSS200                     |
| cg07835424 | 2  | 200,327,334 | <i>SATB2</i> *              | Gene body/5'UTR/1st intron |
| cg07836142 | 6  | 28,411,423  | <i>ZSCAN23</i> <sup>†</sup> | TSS200                     |
| cg07838603 | 6  | 28,411,030  | <i>ZSCAN23</i> <sup>†</sup> | Gene body/5'UTR/1st intron |
| cg07840529 | 6  | 99,272,582  | <i>N/A</i>                  |                            |
| cg07854207 | 11 | 20,690,940  | <i>NELLI1</i> <sup>†</sup>  | TSS200                     |
| cg07860213 | 8  | 70,982,039  | <i>PRDM14</i> *             | Gene body                  |
| cg07873041 | 1  | 91,301,840  | <i>LOC105378853</i>         | TSS200                     |
| cg07914084 | 1  | 237,205,999 | <i>RYR2</i>                 | Gene body/1st intron       |
| cg07920503 | 13 | 25,745,406  | <i>AMER2</i> <sup>†</sup>   | Gene body                  |
| cg07951347 | 6  | 27,463,250  | <i>N/A</i>                  |                            |
| cg07959771 | 7  | 121,956,740 | <i>N/A</i>                  |                            |
| cg07974511 | 2  | 63,283,013  | <i>OTX1</i> *               | Gene body                  |
| cg07975778 | 14 | 52,535,425  | <i>NID2</i> <sup>†</sup>    | Gene body/1st intron       |
| cg07981013 | 7  | 156,795,767 | <i>N/A</i>                  |                            |
| cg07990736 | 9  | 37,026,418  | <i>PAX5</i> *               | Gene body/1st intron       |
| cg08063125 | 19 | 56,989,543  | <i>ZNF667-AS1</i>           | Gene body/1st exon         |
| cg08095196 | 15 | 35,047,023  | <i>GJD2</i>                 | TSS1500                    |
| cg08102185 | 6  | 38,682,995  | <i>DNAH8</i> <sup>†</sup>   | TSS200                     |
| cg08103199 | 10 | 48,439,222  | <i>GDF10</i>                | TSS200                     |
| cg08169864 | 14 | 54,421,413  | <i>BMP4</i>                 | TSS200                     |
| cg08194879 | 6  | 123,317,569 | <i>CLVS2</i>                | Gene body/5'UTR/1st exon   |
| cg08195943 | 3  | 129,694,487 | <i>TRH</i>                  | Gene body/5'UTR/1st intron |
| cg08217024 | 14 | 48,145,108  | <i>MDGA2</i>                | TSS1500                    |
| cg08315202 | 7  | 98,246,006  | <i>NPTX2</i> <sup>†</sup>   | TSS1500                    |
| cg08346159 | 4  | 164,265,012 | <i>NPY5R</i>                | Gene body/5'UTR/1st exon   |
| cg08358166 | 17 | 18,538,271  | <i>N/A</i>                  |                            |
| cg08364561 | 11 | 31,846,844  | <i>PAUPAR</i>               | TSS1500                    |
| cg08393317 | 19 | 54,445,463  | <i>CACNG7</i>               | Gene body                  |
| cg08423443 | 20 | 56,621,504  | <i>N/A</i>                  |                            |

|            |    |             |                             |                            |
|------------|----|-------------|-----------------------------|----------------------------|
| cg08473330 | 2  | 63,282,883  | <i>OTX1</i> *               | Gene body                  |
| cg08490115 | 11 | 30,038,675  | <i>KCNA4</i>                | TSS200                     |
| cg08530237 | 12 | 22,094,563  | <i>N/A</i>                  |                            |
| cg08534653 | 2  | 1,747,700   | <i>PXDN</i>                 | Gene body/1st intron       |
| cg08582356 | 8  | 86,351,018  | <i>CA3</i>                  | TSS200                     |
| cg08607018 | 19 | 31,842,873  | <i>N/A</i>                  |                            |
| cg08609163 | 10 | 104,478,138 | <i>SFXN2</i>                | Gene body/5'UTR/1st intron |
| cg08637438 | 17 | 70,113,856  | <i>SOX9-ASI</i>             | Gene body/1st intron       |
| cg08675717 | 20 | 58,180,241  | <i>PHACTR3</i> <sup>†</sup> | Gene body/1st intron       |
| cg08737296 | 20 | 61,808,691  | <i>MIR124-3</i>             | TSS1500                    |
| cg08738570 | 1  | 1,475,265   | <i>TMEM240</i>              | Gene body/1st intron       |
| cg08768569 | 10 | 106,400,565 | <i>SORCS3</i>               | TSS1500                    |
| cg08784129 | 11 | 31,827,379  | <i>PAX6</i> *               | Gene body                  |
| cg08817483 | 17 | 20,744,547  | <i>N/A</i>                  |                            |
| cg08835103 | 11 | 20,178,138  | <i>DBX1</i> <sup>†</sup>    | Gene body                  |
| cg08862890 | 5  | 169,064,451 | <i>DOCK2</i>                | Gene body/1st intron       |
| cg08870743 | 21 | 34,398,199  | <i>OLIG2</i> *              | TSS200                     |
| cg08919742 | 2  | 154,728,352 | <i>GALNT13</i>              | TSS200                     |
| cg08939095 | 15 | 83,953,068  | <i>BNC1</i> *               | Gene body/1st intron       |
| cg08985029 | 12 | 114,843,296 | <i>TBX5</i> *               | Gene body/5'UTR/1st intron |
| cg08997253 | 9  | 104,500,729 | <i>GRIN3A</i>               | Gene body/5'UTR/1st exon   |
| cg09019936 | 2  | 162,283,434 | <i>N/A</i>                  |                            |
| cg09022422 | 3  | 10,857,798  | <i>SLC6A11</i>              | TSS200                     |
| cg09053680 | 10 | 135,044,114 | <i>UTF1</i> <sup>†</sup>    | Gene body/1st exon         |
| cg09108491 | 5  | 135,265,999 | <i>FBXL21</i>               | TSS200                     |
| cg09118932 | 2  | 1,748,337   | <i>PXDN</i>                 | TSS200                     |
| cg09123188 | 15 | 100,913,934 | <i>CERS3-ASI</i>            | Gene body/1st intron       |
| cg09260089 | 10 | 134,599,860 | <i>NKX6-2</i> *             | TSS1500                    |
| cg09269007 | 3  | 164,914,812 | <i>SLITRK3</i> <sup>†</sup> | Gene body/5'UTR/1st intron |
| cg09275869 | 18 | 44,337,099  | <i>ST8SIA5</i>              | Gene body/5'UTR/1st exon   |
| cg09307861 | 5  | 115,298,252 | <i>LVRN</i>                 | Gene body/5'UTR/1st exon   |
| cg09365759 | 2  | 28,182,529  | <i>BABAM2</i> <sup>†</sup>  | Gene body                  |
| cg09403594 | 5  | 5,140,372   | <i>ADAMTS16</i>             | TSS200                     |
| cg09420907 | 12 | 4,273,763   | <i>N/A</i>                  |                            |
| cg09424526 | 2  | 223,163,809 | <i>PAX3</i> *               | TSS200                     |
| cg09435929 | 8  | 86,350,913  | <i>CA3</i>                  | TSS200                     |
| cg09444657 | 1  | 66,258,196  | <i>PDE4B</i>                | Gene body/5'UTR/1st exon   |
| cg09474331 | 19 | 54,926,805  | <i>TTYH1</i>                | Gene body/1st exon         |
| cg09486902 | 12 | 65,219,478  | <i>TBC1D30</i>              | Gene body/1st intron       |
| cg09493505 | 7  | 49,813,111  | <i>VWC2</i>                 | TSS200                     |
| cg09515205 | 11 | 132,813,571 | <i>OPCML</i>                | TSS200                     |
| cg09516965 | 14 | 52,734,529  | <i>PTGDR</i>                | Gene body/5'UTR/1st exon   |
| cg09537620 | 11 | 31,826,574  | <i>PAX6</i> *               | TSS1500                    |
| cg09618102 | 2  | 1,747,364   | <i>PXDN</i>                 | Gene body/1st intron       |
| cg09659227 | 17 | 46,797,291  | <i>N/A</i>                  |                            |
| cg09671258 | 1  | 180,202,530 | <i>LHX4</i> *               | Gene body/1st intron       |
| cg09714379 | 10 | 135,044,040 | <i>UTF1</i> <sup>†</sup>    | Gene body/1st exon         |
| cg09734791 | 8  | 72,756,155  | <i>MSC-ASI</i>              | TSS200                     |
| cg09775533 | 20 | 32,857,151  | <i>N/A</i>                  |                            |
| cg09813525 | 13 | 53,420,386  | <i>PCDH8</i> <sup>†</sup>   | Gene body/1st exon         |
| cg09870066 | 2  | 68,546,685  | <i>CNRIP1</i> <sup>†</sup>  | Gene body/5'UTR/1st exon   |
| cg09873164 | 1  | 152,488,093 | <i>CRCT1</i> <sup>†</sup>   | Gene body                  |
| cg09880551 | 21 | 42,218,932  | <i>DSCAM</i> <sup>†</sup>   | Gene body/5'UTR/1st exon   |
| cg09896900 | 19 | 44,952,808  | <i>ZNF229</i> <sup>†</sup>  | TSS200                     |
| cg09971314 | 6  | 28,415,023  | <i>N/A</i>                  |                            |
| cg09994356 | 20 | 42,875,779  | <i>GDPALI1</i>              | Gene body/5'UTR/1st exon   |
| cg10022526 | 11 | 27,744,557  | <i>BDNF</i>                 | TSS1500                    |
| cg10068300 | 18 | 11,752,215  | <i>GNAL</i>                 | Gene body/5'UTR/1st intron |
| cg10084379 | 20 | 5,297,573   | <i>PROKR2</i>               | TSS200                     |
| cg10114494 | 9  | 104,501,037 | <i>GRIN3A</i>               | TSS200                     |
| cg10122698 | 18 | 74,961,964  | <i>GALRI</i>                | TSS200                     |
| cg10140114 | 20 | 45,142,258  | <i>ZNF334</i> <sup>†</sup>  | TSS200                     |
| cg10171347 | 10 | 134,600,301 | <i>NKX6-2</i> *             | TSS1500                    |
| cg10171448 | 10 | 134,599,841 | <i>NKX6-2</i> *             | TSS1500                    |
| cg10182317 | 6  | 123,317,487 | <i>CLVS2</i>                | Gene body/5'UTR/1st exon   |
| cg10200388 | 1  | 50,896,185  | <i>N/A</i>                  |                            |

|            |    |             |                              |                            |
|------------|----|-------------|------------------------------|----------------------------|
| cg10215310 | 7  | 103,969,115 | <i>LHFPL3</i>                | Gene body/5'UTR/1st exon   |
| cg10224098 | 1  | 44,873,229  | <i>RNF220</i> <sup>†</sup>   | Gene body/5'UTR/1st intron |
| cg10249375 | 1  | 63,795,934  | <i>N/A</i>                   |                            |
| cg10317138 | 10 | 128,075,923 | <i>ADAM12</i>                | Gene body/1st intron       |
| cg10363631 | 4  | 100,789,506 | <i>DAPP1</i> <sup>†</sup>    | Gene body/3'UTR            |
| cg10379890 | 6  | 391,208     | <i>IRF4</i> *                | TSS1500                    |
| cg10387551 | 11 | 30,038,615  | <i>KCNA4</i>                 | TSS200                     |
| cg10421979 | 17 | 48,546,321  | <i>CHAD</i> <sup>†</sup>     | TSS200                     |
| cg10454246 | 4  | 41,883,890  | <i>LINC00682</i>             | Gene body/1st intron       |
| cg10486998 | 18 | 74,961,787  | <i>GALR1</i>                 | TSS1500                    |
| cg10507275 | 3  | 3,841,130   | <i>LRRN1</i> <sup>†</sup>    | Gene body/5'UTR/1st exon   |
| cg10527010 | 3  | 10,857,795  | <i>SLC6A11</i>               | TSS200                     |
| cg10595388 | 1  | 114,696,664 | <i>SYT6</i>                  | TSS200                     |
| cg10598816 | 2  | 71,192,262  | <i>ATP6V1B1</i> <sup>†</sup> | Gene body/3'UTR            |
| cg10716835 | 10 | 94,834,582  | <i>CYP26A1</i>               | Gene body                  |
| cg10794285 | 18 | 28,622,024  | <i>DSC3</i> <sup>†</sup>     | Gene body/1st intron       |
| cg10824063 | 11 | 20,690,934  | <i>NELLI</i> <sup>†</sup>    | TSS200                     |
| cg10835584 | 18 | 55,108,852  | <i>ONECUT2</i> *             | Gene body/1st intron       |
| cg10864878 | 15 | 47,477,004  | <i>SEMA6D</i>                | Gene body/5'UTR/1st intron |
| cg10888790 | 10 | 131,766,874 | <i>N/A</i>                   |                            |
| cg10922935 | 17 | 78,452,048  | <i>N/A</i>                   |                            |
| cg11017065 | 11 | 128,564,874 | <i>SENCR</i>                 | Gene body/1st intron       |
| cg11030481 | 2  | 155,555,138 | <i>KCNJ3</i>                 | Gene body/5'UTR/1st exon   |
| cg11051055 | 8  | 11,058,145  | <i>XKR6</i>                  | Gene body/1st exon         |
| cg11071231 | 8  | 57,069,907  | <i>N/A</i>                   |                            |
| cg11163901 | 10 | 134,599,807 | <i>NKX6-2</i> *              | TSS1500                    |
| cg11170375 | 7  | 102,481,976 | <i>FAM185A</i>               | Gene body                  |
| cg11268739 | 14 | 48,145,588  | <i>MDGA2</i>                 | TSS1500                    |
| cg11319592 | 3  | 188,850,137 | <i>N/A</i>                   |                            |
| cg11342452 | 10 | 134,600,463 | <i>NKX6-2</i> *              | TSS1500                    |
| cg11358689 | 11 | 131,781,260 | <i>NTM</i> <sup>†</sup>      | Gene body/5'UTR/1st exon   |
| cg11400792 | 3  | 117,716,222 | <i>N/A</i>                   |                            |
| cg11412466 | 5  | 2,743,655   | <i>N/A</i>                   |                            |
| cg11438011 | 5  | 148,033,882 | <i>HTR4</i>                  | Gene body/1st exon         |
| cg11445123 | 20 | 2,781,478   | <i>CPXMI</i>                 | TSS200                     |
| cg11475550 | 7  | 24,324,570  | <i>NPY</i>                   | Gene body/5'UTR/1st intron |
| cg11487526 | 17 | 6,358,928   | <i>PITPNM3</i>               | Gene body                  |
| cg11493126 | 12 | 65,218,217  | <i>TBCID30</i>               | TSS200                     |
| cg11536474 | 2  | 63,286,049  | <i>N/A</i>                   |                            |
| cg11548971 | 18 | 56,940,674  | <i>RAX</i> *                 | TSS200                     |
| cg11552694 | 5  | 2,752,149   | <i>C5orf38</i>               | TSS200                     |
| cg11595545 | 1  | 111,217,497 | <i>KCNA3</i>                 | Gene body/5'UTR/1st exon   |
| cg11615647 | 22 | 25,678,641  | <i>N/A</i>                   |                            |
| cg11630154 | 3  | 137,484,364 | <i>SOX14</i> *               | Gene body/1st exon/3'UTR   |
| cg11630554 | 4  | 165,878,136 | <i>FAM218A</i>               | Gene body/5'UTR/1st exon   |
| cg11631271 | 19 | 38,700,487  | <i>N/A</i>                   |                            |
| cg11657808 | 1  | 237,205,950 | <i>RYR2</i>                  | Gene body/1st intron       |
| cg11685510 | 1  | 113,286,397 | <i>N/A</i>                   |                            |
| cg11687330 | 11 | 132,953,239 | <i>OPCML</i>                 | Gene body/1st intron       |
| cg11716272 | 2  | 5,837,348   | <i>SOX11</i> *               | Gene body/1st exon/3'UTR   |
| cg11718030 | 11 | 27,744,363  | <i>BDNF</i>                  | TSS1500                    |
| cg11764900 | 6  | 38,683,035  | <i>DNAH8</i> <sup>†</sup>    | TSS200                     |
| cg11814235 | 18 | 28,621,490  | <i>DSC3</i> <sup>†</sup>     | Gene body/1st intron       |
| cg11815425 | 15 | 53,080,459  | <i>ONECUT1</i> *             | Gene body/1st intron       |
| cg11823511 | 1  | 91,183,697  | <i>BARHL2</i> *              | TSS1500                    |
| cg11832404 | 12 | 65,218,258  | <i>TBCID30</i>               | TSS200                     |
| cg11840740 | 6  | 38,683,186  | <i>DNAH8</i> <sup>†</sup>    | Gene body/5'UTR/1st exon   |
| cg11901272 | 6  | 29,760,447  | <i>HCG4</i>                  | Gene body/1st exon         |
| cg11920122 | 18 | 11,751,556  | <i>GNAL</i>                  | Gene body/5'UTR/1st exon   |
| cg11957331 | 19 | 42,828,156  | <i>TMEM145</i>               | Gene body                  |
| cg12071328 | 11 | 20,690,930  | <i>NELLI</i> <sup>†</sup>    | TSS200                     |
| cg12079322 | 2  | 154,728,468 | <i>GALNT13</i>               | Gene body/5'UTR/1st exon   |
| cg12164282 | 2  | 1,748,112   | <i>PXDN</i>                  | Gene body/1st exon         |
| cg12188986 | 11 | 93,063,886  | <i>DEUP1</i>                 | Gene body/5'UTR/1st exon   |
| cg12189551 | 14 | 60,952,945  | <i>C14orf39</i>              | TSS200                     |
| cg12215457 | 6  | 78,173,523  | <i>HTR1B</i>                 | Gene body/5'UTR/1st exon   |

|            |    |             |                             |                            |
|------------|----|-------------|-----------------------------|----------------------------|
| cg12276123 | 2  | 155,555,157 | <i>KCNJ3</i>                | Gene body/5'UTR/1st exon   |
| cg12296772 | 8  | 17,271,067  | <i>MTMR7</i>                | TSS200                     |
| cg12300353 | 4  | 44,450,358  | <i>KCTD8</i>                | Gene body/1st exon         |
| cg12312988 | 2  | 5,832,430   | <i>SOX11</i> *              | TSS1500                    |
| cg12420900 | 10 | 123,922,863 | <i>TACC2</i> <sup>†</sup>   | TSS200                     |
| cg12421755 | 15 | 53,080,933  | <i>ONECUT1</i> *            | Gene body/1st intron       |
| cg12426234 | 21 | 22,370,347  | <i>NCAM2</i> <sup>†</sup>   | TSS1500                    |
| cg12461580 | 2  | 207,139,199 | <i>ZDBF2</i> <sup>†</sup>   | TSS200                     |
| cg12466737 | 18 | 35,146,589  | <i>CELF4</i> <sup>†</sup>   | TSS1500                    |
| cg12468774 | 3  | 49,236,860  | <i>CCDC36</i>               | TSS200                     |
| cg12483476 | 5  | 178,421,711 | <i>GRM6</i>                 | Gene body/1st exon         |
| cg12500879 | 11 | 31,848,649  | <i>PAUPAR</i>               | Gene body/1st exon         |
| cg12552289 | 11 | 132,813,577 | <i>OPCML</i>                | TSS200                     |
| cg12552771 | 22 | 29,709,320  | <i>RASL10A</i>              | Gene body                  |
| cg12616174 | 8  | 9,761,454   | <i>MIR124-1</i>             | TSS1500                    |
| cg12628145 | 5  | 524,679     | <i>SLC9A3</i>               | TSS200                     |
| cg12658947 | 11 | 132,952,915 | <i>OPCML</i>                | Gene body/1st intron       |
| cg12741420 | 6  | 392,131     | <i>IRF4</i> *               | Gene body/5'UTR/1st intron |
| cg12755298 | 8  | 65,711,067  | <i>CYP7B1</i>               | Gene body/1st exon         |
| cg12756396 | 1  | 50,886,969  | <i>DMRTA2</i>               | Gene body                  |
| cg12816961 | 10 | 134,598,927 | <i>NKX6-2</i> *             | Gene body                  |
| cg12825070 | 5  | 148,033,708 | <i>HTR4</i>                 | Gene body/5'UTR/1st exon   |
| cg12861945 | 4  | 165,878,085 | <i>FAM218A</i>              | TSS200                     |
| cg12874181 | 8  | 65,489,906  | <i>LOC401463</i>            | TSS200                     |
| cg12914931 | 8  | 31,496,771  | <i>NRG1</i>                 | TSS1500                    |
| cg13019491 | 14 | 60,977,856  | <i>SIX6</i> *               | Gene body                  |
| cg13039115 | 12 | 65,218,052  | <i>TBC1D30</i>              | TSS1500                    |
| cg13077519 | 6  | 78,174,007  | <i>HTR1B</i>                | TSS1500                    |
| cg13099890 | 12 | 72,667,398  | <i>TRHDE-ASI</i>            | TSS200                     |
| cg13103303 | 11 | 71,955,113  | <i>PHOX2A</i> *             | Gene body/5'UTR/1st exon   |
| cg13126530 | 14 | 102,026,230 | <i>DIO3</i>                 | TSS1500                    |
| cg13138137 | 18 | 35,146,478  | <i>CELF4</i> <sup>†</sup>   | TSS1500                    |
| cg13197216 | 8  | 23,567,658  | <i>N/A</i>                  |                            |
| cg13261713 | 17 | 77,722,336  | <i>N/A</i>                  |                            |
| cg13262687 | 4  | 147,559,579 | <i>POU4F2</i> *             | TSS1500                    |
| cg13267264 | 8  | 70,983,600  | <i>PRDM14</i> *             | TSS200                     |
| cg13288653 | 7  | 27,282,756  | <i>EVX1</i> *               | Gene body/5'UTR/1st exon   |
| cg13314145 | 7  | 98,246,001  | <i>NPTX2</i> <sup>†</sup>   | TSS1500                    |
| cg13345957 | 7  | 156,797,242 | <i>N/A</i>                  |                            |
| cg13346013 | 10 | 118,032,872 | <i>GFRA1</i>                | Gene body/5'UTR/1st exon   |
| cg13347970 | 6  | 137,809,630 | <i>N/A</i>                  |                            |
| cg13371954 | 8  | 70,983,977  | <i>PRDM14</i> *             | TSS1500                    |
| cg13382322 | 18 | 35,147,090  | <i>CELF4</i> <sup>†</sup>   | TSS1500                    |
| cg13411645 | 2  | 3,751,144   | <i>DCDC2C</i>               | TSS200                     |
| cg13518992 | 18 | 55,109,119  | <i>ONECUT2</i> *            | Gene body/1st intron       |
| cg13526469 | 3  | 13,245,693  | <i>N/A</i>                  |                            |
| cg13552201 | 20 | 57,090,104  | <i>APCDD1L</i>              | TSS200                     |
| cg13592399 | 14 | 52,535,758  | <i>NID2</i> <sup>†</sup>    | Gene body/5'UTR/1st exon   |
| cg13596833 | 11 | 31,827,899  | <i>PAX6</i> *               | Gene body                  |
| cg13619915 | 3  | 164,914,437 | <i>SLITRK3</i> <sup>†</sup> | Gene body/5'UTR/1st exon   |
| cg13620034 | 8  | 72,755,052  | <i>MSC-ASI</i>              | TSS1500                    |
| cg13643914 | 4  | 122,302,226 | <i>QRFPR</i>                | TSS200                     |
| cg13735819 | 19 | 2,253,850   | <i>JSRP1</i>                | Gene body                  |
| cg13742526 | 19 | 2,252,432   | <i>JSRP1</i>                | Gene body                  |
| cg13778709 | 20 | 57,089,961  | <i>APCDD1L</i>              | Gene body/5'UTR/1st exon   |
| cg13794530 | 7  | 158,937,494 | <i>VIPR2</i>                | Gene body/5'UTR/1st exon   |
| cg13850355 | 4  | 47,034,939  | <i>GABRB1</i>               | Gene body                  |
| cg13895235 | 7  | 752,292     | <i>PRKAR1B</i> <sup>†</sup> | TSS200                     |
| cg13920886 | 21 | 22,370,438  | <i>NCAM2</i> <sup>†</sup>   | TSS200                     |
| cg13930892 | 11 | 2,292,000   | <i>ASCL2</i> *              | Gene body/5'UTR/1st exon   |
| cg13939859 | 1  | 91,183,519  | <i>BARHL2</i> *             | TSS1500                    |
| cg13945224 | 9  | 98,111,970  | <i>N/A</i>                  |                            |
| cg13958426 | 1  | 169,396,637 | <i>CCDC181</i>              | Gene body/5'UTR/1st exon   |
| cg13969001 | 1  | 18,958,084  | <i>PAX7</i> *               | Gene body/5'UTR/1st exon   |
| cg14007067 | 18 | 76,740,258  | <i>SALL3</i> *              | TSS200                     |
| cg14019323 | 12 | 65,218,413  | <i>TBC1D30</i>              | Gene body/5'UTR/1st exon   |



|            |    |             |                             |                            |
|------------|----|-------------|-----------------------------|----------------------------|
| cg14024242 | 9  | 1,042,869   | <i>N/A</i>                  |                            |
| cg14056357 | 19 | 44,952,665  | <i>ZNF229</i> <sup>†</sup>  | Gene body/1st exon         |
| cg14098442 | 6  | 73,331,756  | <i>KCNQ5</i>                | Gene body/5'UTR/1st exon   |
| cg14168530 | 2  | 45,155,991  | <i>LINC01833</i>            | Gene body/1st intron       |
| cg14179389 | 1  | 92,947,961  | <i>GFII</i> *               | Gene body                  |
| cg14186641 | 6  | 88,876,741  | <i>CNRI</i>                 | TSS1500                    |
| cg14265823 | 2  | 223,163,326 | <i>PAX3</i> *               | Gene body/1st exon         |
| cg14267095 | 9  | 37,026,445  | <i>PAX5</i> *               | Gene body/1st intron       |
| cg14272433 | 1  | 119,530,606 | <i>TBX15</i> *              | TSS200                     |
| cg14273116 | 4  | 107,897     | <i>ZNF718</i> <sup>†</sup>  | Gene body                  |
| cg14287235 | 14 | 24,804,339  | <i>ADCY4</i>                | TSS200                     |
| cg14305278 | 9  | 971,046     | <i>N/A</i>                  |                            |
| cg14331280 | 18 | 30,501,500  | <i>N/A</i>                  |                            |
| cg14350197 | 18 | 35,147,162  | <i>CELF4</i> <sup>†</sup>   | TSS1500                    |
| cg14369938 | 7  | 32,338,150  | <i>PDE1C</i>                | Gene body/1st intron       |
| cg14403130 | 1  | 44,873,057  | <i>RNF220</i> <sup>†</sup>  | Gene body/5'UTR/1st intron |
| cg14409559 | 8  | 72,756,341  | <i>MSC-AS1</i>              | TSS200                     |
| cg14416371 | 11 | 43,602,847  | <i>MIR129-2</i>             | TSS200                     |
| cg14443519 | 6  | 29,760,410  | <i>HCG4</i>                 | Gene body/1st exon         |
| cg14493920 | 9  | 37,038,053  | <i>N/A</i>                  |                            |
| cg14502484 | 5  | 1,446,208   | <i>SLC6A3</i>               | TSS1500                    |
| cg14504259 | 9  | 970,882     | <i>N/A</i>                  |                            |
| cg14507337 | 14 | 60,978,161  | <i>SIX6</i> *               | Gene body/3'UTR            |
| cg14530233 | 8  | 11,059,241  | <i>XKR6</i>                 | TSS1500                    |
| cg14556896 | 12 | 22,094,963  | <i>N/A</i>                  |                            |
| cg14564616 | 5  | 1,876,337   | <i>N/A</i>                  |                            |
| cg14568830 | 10 | 23,463,243  | <i>N/A</i>                  |                            |
| cg14595003 | 3  | 129,694,156 | <i>TRH</i>                  | Gene body/5'UTR/1st intron |
| cg14604568 | 7  | 32,110,523  | <i>PDE1C</i>                | TSS200                     |
| cg14648688 | 3  | 137,490,752 | <i>LINC01210</i>            | Gene body/1st exon         |
| cg14653281 | 9  | 104,500,954 | <i>GRIN3A</i>               | TSS200                     |
| cg14664759 | 1  | 196,577,723 | <i>KCNT2</i>                | TSS200                     |
| cg14666113 | 8  | 11,561,724  | <i>GATA4</i> *              | Gene body/5'UTR/1st exon   |
| cg14689623 | 11 | 20,691,161  | <i>NELLI</i> <sup>†</sup>   | Gene body/5'UTR/1st exon   |
| cg14712186 | 1  | 91,184,413  | <i>N/A</i>                  |                            |
| cg14717170 | 3  | 164,914,471 | <i>SLITRK3</i> <sup>†</sup> | Gene body/5'UTR/1st exon   |
| cg14749465 | 11 | 20,690,720  | <i>NELLI</i> <sup>†</sup>   | TSS1500                    |
| cg14763548 | 20 | 25,062,447  | <i>VXSI</i> *               | Gene body/1st exon         |
| cg14765646 | 2  | 154,334,450 | <i>RPRM</i> <sup>†</sup>    | Gene body/1st exon/3'UTR   |
| cg14776201 | 2  | 5,836,256   | <i>SOX11</i> *              | Gene body/1st exon/3'UTR   |
| cg14894702 | 15 | 83,952,309  | <i>BNC1</i> *               | TSS200                     |
| cg14897833 | 14 | 52,535,178  | <i>NID2</i> <sup>†</sup>    | Gene body/1st intron       |
| cg14900471 | 8  | 11,561,620  | <i>GATA4</i> *              | TSS200                     |
| cg14904261 | 19 | 30,716,712  | <i>N/A</i>                  |                            |
| cg14920003 | 2  | 29,033,726  | <i>SPDYA</i> <sup>†</sup>   | Gene body/5'UTR/1st exon   |
| cg14928902 | 8  | 70,983,532  | <i>PRDM14</i> *             | Gene body/5'UTR/1st exon   |
| cg14944647 | 11 | 43,602,857  | <i>MIR129-2</i>             | TSS200                     |
| cg14983606 | 8  | 65,493,706  | <i>BHLHE22</i> *            | Gene body/1st exon         |
| cg15034345 | 2  | 5,836,111   | <i>SOX11</i> *              | Gene body/1st exon/3'UTR   |
| cg15044957 | 11 | 30,038,672  | <i>KCNA4</i>                | TSS200                     |
| cg15048991 | 5  | 5,139,866   | <i>CTD-2297D10.2</i>        | Gene body/1st intron       |
| cg15139644 | 18 | 35,065,386  | <i>CELF4</i> <sup>†</sup>   | Gene body/5'UTR            |
| cg15146859 | 18 | 74,961,737  | <i>GALR1</i>                | TSS1500                    |
| cg15160198 | 8  | 65,711,369  | <i>CYP7B1</i>               | TSS200                     |
| cg15175143 | 2  | 139,538,356 | <i>NXPH2</i> <sup>†</sup>   | TSS1500                    |
| cg15179725 | 18 | 35,147,079  | <i>CELF4</i> <sup>†</sup>   | TSS1500                    |
| cg15191648 | 18 | 76,740,262  | <i>SALL3</i> *              | TSS200                     |
| cg15228928 | 13 | 112,727,521 | <i>SOX1-OT</i>              | Gene body/1st intron       |
| cg15241920 | 19 | 54,926,514  | <i>TTYHI</i>                | TSS200                     |
| cg15245095 | 12 | 79,258,438  | <i>SYT1</i>                 | TSS200                     |
| cg15301489 | 8  | 11,058,770  | <i>XKR6</i>                 | Gene body/1st exon         |
| cg15304699 | 10 | 134,600,675 | <i>NKX6-2</i> *             | TSS1500                    |
| cg15313459 | 2  | 68,547,052  | <i>CNRIP1</i> <sup>†</sup>  | Gene body/5'UTR/1st exon   |
| cg15393498 | 2  | 241,035,593 | <i>N/A</i>                  |                            |
| cg15462887 | 11 | 27,744,049  | <i>BDNF</i>                 | TSS1500                    |
| cg15511381 | 18 | 35,147,532  | <i>N/A</i>                  |                            |

|            |    |             |                           |                            |
|------------|----|-------------|---------------------------|----------------------------|
| cg15547669 | 20 | 2,781,122   | <i>CPXMI</i>              | Gene body/1st exon         |
| cg15556502 | 11 | 43,602,845  | <i>MIR129-2</i>           | TSS200                     |
| cg15570323 | 3  | 157,261,004 | <i>PQLC2L</i>             | TSS200                     |
| cg15585794 | 11 | 131,780,329 | <i>NTM</i> <sup>†</sup>   | TSS1500                    |
| cg15617814 | 11 | 131,780,492 | <i>NTM</i> <sup>†</sup>   | TSS1500                    |
| cg15681537 | 21 | 22,370,733  | <i>NCAM2</i> <sup>†</sup> | Gene body/5'UTR/1st exon   |
| cg15682043 | 12 | 5,019,499   | <i>KCNA1</i>              | Gene body/5'UTR/1st exon   |
| cg15690342 | 5  | 72,594,851  | <i>N/A</i>                |                            |
| cg15703632 | 2  | 223,163,725 | <i>PAX3</i> *             | TSS200                     |
| cg15707093 | 4  | 174,450,353 | <i>HAND2-AS1</i>          | Gene body/1st intron       |
| cg15723536 | 19 | 54,926,617  | <i>TTYH1</i>              | Gene body/5'UTR/1st exon   |
| cg15724256 | 2  | 119,602,857 | <i>EN1</i> *              | Gene body/1st intron       |
| cg15740363 | 8  | 65,488,839  | <i>LOC401463</i>          | Gene body                  |
| cg15778437 | 11 | 31,839,521  | <i>PAX6</i> *             | TSS200                     |
| cg15845792 | 6  | 28,175,446  | <i>N/A</i>                |                            |
| cg15850954 | 10 | 26,505,245  | <i>GAD2</i>               | Gene body/5'UTR/1st exon   |
| cg15861196 | 11 | 20,618,308  | <i>N/A</i>                |                            |
| cg15873149 | 3  | 147,137,180 | <i>N/A</i>                |                            |
| cg15891112 | 1  | 159,141,371 | <i>CADM3</i> <sup>†</sup> | Gene body/5'UTR/1st exon   |
| cg15911806 | 14 | 97,685,576  | <i>N/A</i>                |                            |
| cg15921876 | 3  | 133,393,656 | <i>TF</i>                 | Gene body/5'UTR/1st intron |
| cg15929698 | 7  | 24,323,792  | <i>NPY</i>                | TSS200                     |
| cg15963901 | 7  | 49,813,085  | <i>VWC2</i>               | TSS200                     |
| cg15994414 | 6  | 28,414,801  | <i>N/A</i>                |                            |
| cg16027761 | 13 | 53,422,871  | <i>PCDH8</i> <sup>†</sup> | TSS200                     |
| cg16150752 | 5  | 16,180,072  | <i>MARCH11</i>            | TSS200                     |
| cg16162905 | 9  | 104,501,251 | <i>GRIN3A</i>             | TSS1500                    |
| cg16203381 | 18 | 55,108,965  | <i>ONECUT2</i> *          | Gene body/1st intron       |
| cg16232126 | 2  | 108,603,005 | <i>SLC5A7</i>             | Gene body/5'UTR/1st exon   |
| cg16266667 | 8  | 15,095,163  | <i>SGCZ</i> <sup>†</sup>  | Gene body/5'UTR/1st exon   |
| cg16283362 | 7  | 156,795,914 | <i>N/A</i>                |                            |
| cg16288089 | 7  | 97,361,408  | <i>TAC1</i>               | Gene body/5'UTR/1st exon   |
| cg16326674 | 4  | 122,301,816 | <i>QRFP</i>               | Gene body/5'UTR/1st exon   |
| cg16355785 | 5  | 161,274,751 | <i>GABRA1</i>             | Gene body/5'UTR/1st exon   |
| cg16407471 | 11 | 43,602,914  | <i>MIR129-2</i>           | TSS200                     |
| cg16428251 | 3  | 137,483,479 | <i>SOX14</i> *            | Gene body/5'UTR/1st exon   |
| cg16433156 | 18 | 76,740,091  | <i>SALL3</i> *            | TSS200                     |
| cg16504626 | 8  | 57,070,013  | <i>N/A</i>                |                            |
| cg16601494 | 1  | 1,475,737   | <i>TMEM240</i>            | Gene body/5'UTR/1st exon   |
| cg16616521 | 11 | 31,821,388  | <i>PAX6</i> *             | Gene body                  |
| cg16642284 | 10 | 129,535,378 | <i>FOXI2</i> *            | TSS200                     |
| cg16647921 | 4  | 41,867,533  | <i>N/A</i>                |                            |
| cg16655240 | 20 | 32,857,072  | <i>ASIP</i> <sup>†</sup>  | Gene body/3'UTR            |
| cg16661508 | 12 | 79,258,427  | <i>SYT1</i>               | TSS200                     |
| cg16661628 | 20 | 32,857,227  | <i>N/A</i>                |                            |
| cg16661755 | 6  | 123,317,640 | <i>CLVS2</i>              | Gene body/5'UTR/1st exon   |
| cg16664667 | 10 | 7,450,813   | <i>SFMBT2</i>             | Gene body/5'UTR/1st intron |
| cg16729415 | 15 | 35,047,203  | <i>LOC101928174</i>       | TSS200                     |
| cg16732616 | 1  | 50,886,782  | <i>DMRTA2</i>             | Gene body                  |
| cg16781205 | 14 | 102,026,543 | <i>DIO3</i>               | TSS1500                    |
| cg16801887 | 16 | 86,541,480  | <i>FENRR</i>              | Gene body/1st intron       |
| cg16817826 | 3  | 62,356,323  | <i>FEZF2</i> *            | Gene body                  |
| cg16827475 | 10 | 131,767,526 | <i>N/A</i>                |                            |
| cg16846653 | 12 | 22,094,034  | <i>N/A</i>                |                            |
| cg16849609 | 2  | 119,916,662 | <i>C1QL2</i>              | TSS200                     |
| cg16892318 | 5  | 5,140,404   | <i>ADAMTS16</i>           | TSS200                     |
| cg16921310 | 12 | 103,351,987 | <i>PAH</i>                | Gene body/5'UTR/1st exon   |
| cg16949120 | 10 | 134,599,783 | <i>NKX6-2</i> *           | TSS1500                    |
| cg16964348 | 7  | 24,323,799  | <i>NPY</i>                | TSS200                     |
| cg16970357 | 11 | 31,820,209  | <i>PAX6</i> *             | Gene body                  |
| cg17029019 | 17 | 1,959,124   | <i>HIC1</i> *             | TSS1500                    |
| cg17087479 | 1  | 214,156,255 | <i>PROX1-AS1</i>          | Gene body/1st intron       |
| cg17088073 | 1  | 50,882,910  | <i>N/A</i>                |                            |
| cg17092594 | 9  | 100,615,349 | <i>PTCSC2</i>             | Gene body/1st exon         |
| cg17093748 | 18 | 74,124,270  | <i>ZNF516</i> *           | Gene body                  |
| cg17124224 | 15 | 83,953,880  | <i>BNC1</i> *             | TSS1500                    |

|            |    |             |                             |                            |
|------------|----|-------------|-----------------------------|----------------------------|
| cg17154724 | 1  | 171,810,322 | <i>DNM3</i> <sup>†</sup>    | TSS1500                    |
| cg17222164 | 17 | 43,339,476  | <i>SPATA32</i> <sup>†</sup> | Gene body/5'UTR/1st exon   |
| cg17228900 | 6  | 391,764     | <i>IRF4</i> <sup>*</sup>    | Gene body/1st exon         |
| cg17265829 | 4  | 126,238,422 | <i>FAT4</i> <sup>†</sup>    | Gene body/1st exon         |
| cg17267805 | 10 | 44,880,545  | <i>CXCL12</i>               | Gene body/5'UTR/1st exon   |
| cg17307479 | 8  | 65,494,101  | <i>BHLHE22</i> <sup>*</sup> | Gene body/1st exon         |
| cg17319486 | 18 | 35,147,056  | <i>CELF4</i> <sup>†</sup>   | TSS1500                    |
| cg17371081 | 11 | 20,690,957  | <i>NELLI</i> <sup>†</sup>   | TSS200                     |
| cg17380661 | 6  | 100,912,946 | <i>SIMI</i> <sup>*</sup>    | TSS1500                    |
| cg17385936 | 3  | 132,756,986 | <i>TMEM108</i>              | TSS200                     |
| cg17496659 | 1  | 3,568,245   | <i>TP73</i> <sup>*</sup>    | TSS1500                    |
| cg17509220 | 19 | 13,617,012  | <i>CACNA1A</i>              | Gene body/1st exon         |
| cg17526573 | 2  | 50,574,708  | <i>NRXN1</i>                | Gene body/5'UTR/1st exon   |
| cg17535595 | 13 | 53,422,808  | <i>PCDH8</i> <sup>†</sup>   | TSS200                     |
| cg17538572 | 10 | 94,834,763  | <i>CYP26A1</i>              | Gene body                  |
| cg17560895 | 9  | 100,069,891 | <i>CCDC180</i>              | TSS200                     |
| cg17566517 | 12 | 108,238,234 | <i>N/A</i>                  |                            |
| cg17683427 | 11 | 131,780,894 | <i>NTM</i> <sup>†</sup>     | Gene body/5'UTR/1st exon   |
| cg17712694 | 5  | 16,180,068  | <i>MARCH11</i>              | TSS200                     |
| cg17823751 | 3  | 137,487,081 | <i>N/A</i>                  |                            |
| cg17834752 | 8  | 140,715,239 | <i>KCNK9</i>                | Gene body/1st exon         |
| cg17875483 | 15 | 47,476,436  | <i>SEMA6D</i>               | Gene body/5'UTR/1st exon   |
| cg17890928 | 17 | 48,546,193  | <i>CHAD</i> <sup>†</sup>    | Gene body/5'UTR/1st exon   |
| cg17911318 | 18 | 74,962,000  | <i>GALR1</i>                | TSS200                     |
| cg17912370 | 3  | 157,261,106 | <i>PQLC2L</i>               | TSS200                     |
| cg17926940 | 14 | 97,685,060  | <i>N/A</i>                  |                            |
| cg17973164 | 18 | 35,146,591  | <i>CELF4</i> <sup>†</sup>   | TSS1500                    |
| cg17991695 | 6  | 10,882,974  | <i>GCM2</i> <sup>*</sup>    | TSS1500                    |
| cg17996619 | 10 | 134,600,701 | <i>NKX6-2</i> <sup>*</sup>  | TSS1500                    |
| cg18007850 | 3  | 10,206,537  | <i>IRAK2</i>                | TSS200                     |
| cg18035229 | 8  | 70,984,270  | <i>PRDM14</i> <sup>*</sup>  | TSS1500                    |
| cg18044663 | 10 | 118,032,081 | <i>GFRA1</i>                | Gene body/5'UTR/1st exon   |
| cg18063733 | 5  | 50,265,443  | <i>LINC02106</i>            | Gene body/1st intron       |
| cg18073938 | 4  | 100,789,493 | <i>DAPPI</i> <sup>†</sup>   | Gene body/3'UTR            |
| cg18082638 | 11 | 31,827,757  | <i>PAX6</i> <sup>*</sup>    | Gene body                  |
| cg18087672 | 17 | 46,824,915  | <i>N/A</i>                  |                            |
| cg18130044 | 20 | 21,682,362  | <i>LINC01726</i>            | Gene body/1st intron       |
| cg18146737 | 1  | 92,946,700  | <i>GFII</i> <sup>*</sup>    | Gene body                  |
| cg18147485 | 8  | 110,986,685 | <i>KCNV1</i>                | Gene body/5'UTR            |
| cg18156204 | 17 | 71,948,613  | <i>N/A</i>                  |                            |
| cg18177414 | 7  | 149,389,929 | <i>N/A</i>                  |                            |
| cg18197392 | 20 | 23,015,908  | <i>SSTR4</i>                | TSS200                     |
| cg18210226 | 6  | 123,317,714 | <i>CLVS2</i>                | Gene body/5'UTR/1st exon   |
| cg18240143 | 14 | 60,952,599  | <i>C14orf39</i>             | Gene body/5'UTR/1st intron |
| cg18259520 | 10 | 50,603,925  | <i>DRGX</i> <sup>*</sup>    | Gene body/5'UTR/1st intron |
| cg18264657 | 18 | 4,455,862   | <i>DLGAPI</i> <sup>†</sup>  | TSS1500                    |
| cg18316974 | 1  | 92,947,035  | <i>GFII</i> <sup>*</sup>    | Gene body                  |
| cg18343957 | 14 | 48,144,197  | <i>MDGA2</i>                | TSS200                     |
| cg18352427 | 2  | 223,163,677 | <i>PAX3</i> <sup>*</sup>    | Gene body/5'UTR/1st exon   |
| cg18358894 | 7  | 121,956,890 | <i>N/A</i>                  |                            |
| cg18366209 | 6  | 123,317,408 | <i>CLVS2</i>                | Gene body/5'UTR/1st exon   |
| cg18372607 | 11 | 31,827,084  | <i>PAX6</i> <sup>*</sup>    | TSS1500                    |
| cg18375860 | 1  | 237,205,409 | <i>RYR2</i>                 | TSS1500                    |
| cg18387156 | 8  | 31,496,644  | <i>NRG1</i>                 | TSS1500                    |
| cg18399075 | 19 | 21,657,650  | <i>N/A</i>                  |                            |
| cg18438793 | 1  | 40,149,837  | <i>HPCAL4</i> <sup>†</sup>  | Gene body                  |
| cg18500192 | 3  | 19,189,930  | <i>KCNH8</i>                | TSS200                     |
| cg18543270 | 18 | 5,543,271   | <i>EPB41L3</i> <sup>†</sup> | Gene body/5'UTR/1st intron |
| cg18560204 | 15 | 83,953,709  | <i>BNC1</i> <sup>*</sup>    | TSS1500                    |
| cg18567924 | 15 | 95,870,450  | <i>LINC01197</i>            | TSS200                     |
| cg18596362 | 18 | 70,210,955  | <i>CBLN2</i>                | Gene body/5'UTR/1st intron |
| cg18601167 | 7  | 752,286     | <i>PRKAR1B</i> <sup>†</sup> | TSS200                     |
| cg18657094 | 3  | 2,140,030   | <i>CNTN4</i> <sup>†</sup>   | TSS1500                    |
| cg18672939 | 10 | 118,032,879 | <i>GFRA1</i>                | Gene body/5'UTR/1st exon   |
| cg18683604 | 14 | 51,561,293  | <i>TRIM</i> <sup>9†</sup>   | Gene body/1st exon         |
| cg18693395 | 14 | 52,735,421  | <i>PTGDR</i>                | Gene body/1st intron       |

|            |    |             |                             |                            |
|------------|----|-------------|-----------------------------|----------------------------|
| cg18710784 | 11 | 132,813,563 | <i>OPCML</i>                | TSS200                     |
| cg18739950 | 15 | 95,870,440  | <i>LINC01197</i>            | TSS200                     |
| cg18771173 | 2  | 108,602,937 | <i>SLC5A7</i>               | TSS200                     |
| cg18794577 | 9  | 104,501,030 | <i>GRIN3A</i>               | TSS200                     |
| cg18804615 | 14 | 102,027,760 | <i>DIO3</i>                 | Gene body/5'UTR/1st exon   |
| cg18841159 | 6  | 70,992,041  | <i>COL9A1</i> <sup>†</sup>  | Gene body/1st intron       |
| cg18845377 | 7  | 156,795,892 | <i>N/A</i>                  |                            |
| cg18854419 | 11 | 91,957,989  | <i>N/A</i>                  |                            |
| cg18856581 | 14 | 48,145,000  | <i>MDGA2</i>                | TSS1500                    |
| cg18867004 | 15 | 47,476,222  | <i>SEMA6D</i>               | TSS200                     |
| cg18897632 | 2  | 5,836,231   | <i>SOX11</i> *              | Gene body/1st exon/3'UTR   |
| cg18930994 | 4  | 156,129,424 | <i>NPY2R</i>                | TSS1500                    |
| cg18932983 | 11 | 132,813,569 | <i>OPCML</i>                | TSS200                     |
| cg18947951 | 2  | 63,285,739  | <i>N/A</i>                  |                            |
| cg18969232 | 2  | 45,156,937  | <i>LINC01833</i>            | Gene body/1st intron       |
| cg19050990 | 1  | 98,511,523  | <i>MIR2682</i>              | TSS1500                    |
| cg19051171 | 8  | 11,059,059  | <i>XKR6</i>                 | TSS200                     |
| cg19056926 | 18 | 74,962,367  | <i>GALR1</i>                | Gene body/5'UTR/1st exon   |
| cg19113326 | 7  | 39,454,157  | <i>POU6F2</i> *             | Gene body                  |
| cg19170208 | 22 | 25,679,272  | <i>N/A</i>                  |                            |
| cg19178853 | 4  | 174,450,408 | <i>HAND2-AS1</i>            | Gene body/1st intron       |
| cg19355087 | 10 | 134,600,295 | <i>NKX6-2</i> *             | TSS1500                    |
| cg19370054 | 2  | 98,964,186  | <i>CNGA3</i>                | Gene body/5'UTR/1st intron |
| cg19456540 | 14 | 60,976,285  | <i>SIX6</i> *               | Gene body/1st exon         |
| cg19485539 | 10 | 118,031,870 | <i>GFRA1</i>                | TSS200                     |
| cg19578835 | 14 | 38,067,622  | <i>TTC6</i> <sup>†</sup>    | Gene body/5'UTR/1st intron |
| cg19611809 | 15 | 53,080,209  | <i>ONECUT1</i> *            | Gene body/1st intron       |
| cg19642588 | 3  | 117,716,214 | <i>N/A</i>                  |                            |
| cg19656577 | 12 | 3,600,229   | <i>PRMT8</i>                | TSS200                     |
| cg19686014 | 20 | 56,803,768  | <i>ANKRD60</i>              | TSS200                     |
| cg19691993 | 3  | 19,190,001  | <i>KCNH8</i>                | TSS200                     |
| cg19712603 | 13 | 53,422,777  | <i>PCDH8</i> <sup>†</sup>   | TSS200                     |
| cg19717586 | 11 | 131,781,257 | <i>NTM</i> <sup>†</sup>     | Gene body/5'UTR/1st exon   |
| cg19763461 | 2  | 63,284,557  | <i>OTX1</i> *               | Gene body                  |
| cg19853833 | 18 | 35,146,668  | <i>CELF4</i> <sup>†</sup>   | TSS1500                    |
| cg19861741 | 5  | 170,742,608 | <i>N/A</i>                  |                            |
| cg19883384 | 8  | 25,905,478  | <i>N/A</i>                  |                            |
| cg19901801 | 1  | 114,697,032 | <i>SYT6</i>                 | TSS1500                    |
| cg19944763 | 10 | 15,761,854  | <i>ITGA8</i>                | Gene body/5'UTR/1st exon   |
| cg19945554 | 15 | 100,913,842 | <i>CERS3-AS1</i>            | Gene body/1st intron       |
| cg19961043 | 17 | 48,546,431  | <i>CHAD</i> <sup>†</sup>    | TSS1500                    |
| cg19971716 | 4  | 122,301,740 | <i>QRFPR</i>                | Gene body/1st exon         |
| cg19988449 | 15 | 83,952,808  | <i>BNC1</i> *               | TSS1500                    |
| cg20041366 | 12 | 62,586,267  | <i>FAM19A2</i>              | Gene body/5'UTR/1st exon   |
| cg20059140 | 18 | 11,751,516  | <i>GNAL</i>                 | Gene body/5'UTR/1st exon   |
| cg20093476 | 2  | 29,033,286  | <i>SPDYA</i> <sup>†</sup>   | TSS1500                    |
| cg20141578 | 12 | 12,225,262  | <i>BCL2L14</i> <sup>†</sup> | Gene body/5'UTR/1st intron |
| cg20271517 | 4  | 156,129,862 | <i>NPY2R</i>                | Gene body/5'UTR/1st exon   |
| cg20297199 | 14 | 54,422,775  | <i>BMP4</i>                 | Gene body/5'UTR/1st intron |
| cg20302133 | 1  | 111,217,194 | <i>KCNA3</i>                | Gene body/1st exon         |
| cg20311863 | 1  | 91,184,126  | <i>BARHL2</i> *             | TSS1500                    |
| cg20372045 | 2  | 223,163,679 | <i>PAX3</i> *               | Gene body/5'UTR/1st exon   |
| cg20381963 | 7  | 752,238     | <i>PRKAR1B</i> <sup>†</sup> | TSS200                     |
| cg20443254 | 12 | 108,169,020 | <i>ASCL4</i> <sup>†</sup>   | Gene body/1st exon         |
| cg20477644 | 18 | 11,752,076  | <i>GNAL</i>                 | Gene body/5'UTR/1st intron |
| cg20548934 | 1  | 159,141,367 | <i>CADM3</i> <sup>†</sup>   | Gene body/5'UTR/1st exon   |
| cg20560169 | 14 | 102,026,283 | <i>DIO3</i>                 | TSS1500                    |
| cg20577027 | 2  | 198,651,356 | <i>BOLL</i> <sup>†</sup>    | TSS1500                    |
| cg20593471 | 18 | 60,829,294  | <i>BCL2</i> <sup>†</sup>    | Gene body                  |
| cg20618622 | 4  | 164,265,004 | <i>NPY5R</i>                | Gene body/5'UTR/1st exon   |
| cg20634967 | 13 | 58,204,224  | <i>N/A</i>                  |                            |
| cg20664636 | 17 | 1,959,596   | <i>HIC1</i> *               | TSS200                     |
| cg20675505 | 8  | 72,756,812  | <i>MSC</i>                  |                            |
| cg20677901 | 1  | 3,568,210   | <i>TP73</i> *               | TSS1500                    |
| cg20820063 | 18 | 31,020,627  | <i>CCDC178</i>              | Gene body/5'UTR/1st exon   |
| cg20830514 | 7  | 158,936,538 | <i>VIPR2</i>                | Gene body/1st intron       |

|             |    |             |                             |                            |
|-------------|----|-------------|-----------------------------|----------------------------|
| cg20872937  | 18 | 74,961,968  | <i>GALRI</i>                | TSS200                     |
| cg20881910  | 11 | 131,780,332 | <i>NTM</i> <sup>†</sup>     | TSS1500                    |
| cg20897776  | 7  | 32,110,525  | <i>PDEIC</i>                | TSS200                     |
| cg20969194  | 2  | 223,163,175 | <i>CCDC140</i>              | Gene body/5'UTR/1st intron |
| cg20985450  | 13 | 100,621,382 | <i>ZIC5</i> *               | Gene body/1st exon         |
| cg21008602  | 8  | 65,492,936  | <i>BHLHE22</i> *            | Gene body/5'UTR/1st exon   |
| cg21012296  | 20 | 21,502,728  | <i>N/A</i>                  |                            |
| cg21016855  | 11 | 31,819,444  | <i>PAX6</i> *               | Gene body                  |
| cg21039938  | 14 | 48,144,314  | <i>MDGA2</i>                | TSS200                     |
| cg21053831  | 18 | 4,455,512   | <i>DLGAPI</i> <sup>†</sup>  | TSS1500                    |
| cg21097881  | 7  | 24,323,939  | <i>NPY</i>                  | Gene body/5'UTR/1st intron |
| cg211173447 | 21 | 42,218,964  | <i>DSCAM</i> <sup>†</sup>   | Gene body/1st exon         |
| cg211185289 | 2  | 74,743,437  | <i>TLX2</i> *               | Gene body/3'UTR            |
| cg21277995  | 6  | 393,239     | <i>IRF4</i> *               | Gene body                  |
| cg21282630  | 21 | 27,945,125  | <i>CYYR1</i>                | Gene body/1st intron       |
| cg21287936  | 19 | 56,989,812  | <i>ZNF667-ASI</i>           | Gene body/1st intron       |
| cg21392341  | 1  | 119,530,677 | <i>TBX15</i> *              | TSS1500                    |
| cg21402590  | 6  | 391,550     | <i>IRF4</i> *               | TSS200                     |
| cg21438101  | 18 | 904,885     | <i>ADCYAP1</i>              | TSS200                     |
| cg21459340  | 20 | 2,781,324   | <i>CPXMI</i>                | TSS200                     |
| cg21472506  | 2  | 63,283,967  | <i>OTX1</i> *               | Gene body/3'UTR            |
| cg21512644  | 4  | 156,130,016 | <i>NPY2R</i>                | Gene body/5'UTR/1st exon   |
| cg21578219  | 1  | 18,434,542  | <i>IGSF21</i>               | Gene body/5'UTR/1st exon   |
| cg21624902  | 3  | 138,679,358 | <i>N/A</i>                  |                            |
| cg21678312  | 12 | 71,314,587  | <i>PTPRR</i>                | TSS200                     |
| cg21684012  | 6  | 100,912,906 | <i>SIMI</i> *               | TSS1500                    |
| cg21697172  | 14 | 60,952,931  | <i>C14orf39</i>             | TSS200                     |
| cg21820677  | 4  | 46,392,528  | <i>GABRA2</i>               | TSS1500                    |
| cg21845434  | 16 | 20,085,100  | <i>GPR139</i>               | Gene body/5'UTR/1st exon   |
| cg21859426  | 5  | 148,033,887 | <i>HTR4</i>                 | Gene body/1st exon         |
| cg21901718  | 5  | 16,180,076  | <i>MARCH11</i>              | TSS200                     |
| cg21907743  | 1  | 237,205,450 | <i>RYR2</i>                 | TSS1500                    |
| cg21938435  | 18 | 74,962,359  | <i>GALRI</i>                | Gene body/5'UTR/1st exon   |
| cg21980043  | 12 | 43,945,874  | <i>ADAMTS20</i>             | TSS200                     |
| cg22014661  | 6  | 62,996,130  | <i>KHDRBS2</i> <sup>†</sup> | Gene body/5'UTR/1st exon   |
| cg22040469  | 11 | 17,742,759  | <i>MYOD1</i> *              | Gene body                  |
| cg22095604  | 18 | 31,803,241  | <i>NOL4</i> <sup>†</sup>    | Gene body/5'UTR/1st exon   |
| cg22113930  | 15 | 26,108,410  | <i>ATP10A</i>               | TSS200                     |
| cg22162281  | 2  | 207,139,197 | <i>ZDBF2</i> <sup>†</sup>   | TSS200                     |
| cg22187354  | 11 | 64,480,312  | <i>NRXN2</i>                | Gene body                  |
| cg22199216  | 22 | 25,678,988  | <i>N/A</i>                  |                            |
| cg22288103  | 11 | 27,743,654  | <i>BDNF</i>                 | TSS200                     |
| cg22304612  | 20 | 2,781,241   | <i>CPXMI</i>                | Gene body/5'UTR/1st exon   |
| cg22319784  | 5  | 180,486,879 | <i>BTNL9</i>                | Gene body/3'UTR            |
| cg22333214  | 1  | 98,511,789  | <i>MIR137</i>               | TSS200                     |
| cg22336004  | 1  | 66,258,035  | <i>PDE4B</i>                | TSS200                     |
| cg22352818  | 2  | 97,193,289  | <i>N/A</i>                  |                            |
| cg22370295  | 1  | 237,205,384 | <i>RYR2</i>                 | TSS1500                    |
| cg22425703  | 13 | 27,334,464  | <i>GPR12</i>                | Gene body/5'UTR/1st intron |
| cg22484737  | 7  | 115,117,568 | <i>N/A</i>                  |                            |
| cg22486777  | 19 | 34,965,973  | <i>N/A</i>                  |                            |
| cg22489498  | 1  | 214,162,711 | <i>PROX1</i> *              | Gene body/5'UTR/1st intron |
| cg22491927  | 19 | 13,617,091  | <i>CACNA1A</i>              | Gene body/5'UTR/1st exon   |
| cg22517735  | 4  | 174,451,954 | <i>HAND2-ASI</i>            | Gene body/1st intron       |
| cg22557091  | 11 | 31,827,920  | <i>PAX6</i> *               | Gene body                  |
| cg22596998  | 14 | 102,343,072 | <i>PPP2R5C</i>              | Gene body                  |
| cg22618215  | 3  | 62,354,489  | <i>N/A</i>                  |                            |
| cg22740492  | 11 | 31,820,658  | <i>PAX6</i> *               | Gene body                  |
| cg22763718  | 13 | 53,422,780  | <i>PCDH8</i> <sup>†</sup>   | TSS200                     |
| cg22774088  | 19 | 2,253,398   | <i>JSRPI</i>                | Gene body                  |
| cg22784954  | 5  | 5,140,646   | <i>ADAMTS16</i>             | Gene body/1st exon         |
| cg22844085  | 3  | 156,009,623 | <i>KCNAB1</i>               | Gene body/5'UTR/1st exon   |
| cg22865470  | 1  | 113,286,757 | <i>N/A</i>                  |                            |
| cg22881914  | 14 | 52,536,147  | <i>NID2</i> <sup>†</sup>    | TSS1500                    |
| cg22885558  | 3  | 137,484,220 | <i>SOX14</i> *              | Gene body/1st exon         |
| cg22890027  | 12 | 22,094,182  | <i>N/A</i>                  |                            |

|            |    |             |                            |                            |
|------------|----|-------------|----------------------------|----------------------------|
| cg22966986 | 14 | 48,143,852  | <i>MDGA2</i>               | Gene body/5'UTR/1st exon   |
| cg22987447 | 3  | 157,261,104 | <i>PQLC2L</i>              | TSS200                     |
| cg23008230 | 8  | 687,959     | <i>DLGAP2</i> <sup>†</sup> | Gene body/1st intron       |
| cg23010538 | 1  | 190,447,290 | <i>LINC01351</i>           | TSS200                     |
| cg23011597 | 3  | 19,190,158  | <i>KCNH8</i>               | Gene body/5'UTR/1st exon   |
| cg23013309 | 12 | 65,218,841  | <i>TBC1D30</i>             | Gene body/1st intron       |
| cg23068913 | 10 | 23,463,377  | <i>N/A</i>                 |                            |
| cg23087992 | 3  | 181,430,208 | <i>SOX2</i> *              | Gene body/1st exon         |
| cg23097402 | 1  | 50,883,394  | <i>DMRTA2</i>              | Gene body/3'UTR            |
| cg23125492 | 11 | 31,821,298  | <i>PAX6</i> *              | Gene body                  |
| cg23134869 | 8  | 77,593,233  | <i>ZFHX4</i> *             | TSS1500                    |
| cg23141355 | 3  | 44,063,593  | <i>N/A</i>                 |                            |
| cg23160016 | 4  | 46,391,929  | <i>GABRA2</i>              | Gene body/5'UTR/1st exon   |
| cg23192059 | 4  | 47,034,428  | <i>GABRB1</i>              | Gene body                  |
| cg23222756 | 14 | 48,144,339  | <i>MDGA2</i>               | TSS200                     |
| cg23229261 | 2  | 63,284,066  | <i>OTX1</i> *              | Gene body/3'UTR            |
| cg23243463 | 18 | 35,146,454  | <i>CELF4</i> <sup>†</sup>  | TSS1500                    |
| cg23253569 | 21 | 34,398,222  | <i>OLIG2</i> *             | Gene body/5'UTR/1st exon   |
| cg23302682 | 6  | 166,580,952 | <i>T</i>                   | Gene body                  |
| cg23338503 | 5  | 169,064,530 | <i>DOCK2</i>               | Gene body/1st intron       |
| cg23349790 | 1  | 18,434,576  | <i>IGSF21</i>              | Gene body/5'UTR/1st exon   |
| cg23367608 | 6  | 117,086,601 | <i>FAM162B</i>             | Gene body/1st exon         |
| cg23371278 | 10 | 101,089,646 | <i>CNNM1</i>               | Gene body/1st exon         |
| cg23448584 | 20 | 2,781,316   | <i>CPXMI</i>               | TSS200                     |
| cg23458558 | 8  | 85,096,868  | <i>RALYL</i> <sup>†</sup>  | TSS200                     |
| cg23554956 | 8  | 65,489,040  | <i>LOC401463</i>           | Gene body                  |
| cg23572908 | 7  | 158,937,969 | <i>VIPR2</i>               | TSS1500                    |
| cg23657185 | 6  | 99,272,559  | <i>N/A</i>                 |                            |
| cg23663774 | 4  | 111,555,440 | <i>PITX2</i> *             | Gene body/5'UTR/1st intron |
| cg23676588 | 4  | 46,392,526  | <i>GABRA2</i>              | TSS1500                    |
| cg23684878 | 12 | 65,218,260  | <i>TBC1D30</i>             | TSS200                     |
| cg23697278 | 4  | 175,750,510 | <i>GLRA3</i>               | TSS200                     |
| cg23699196 | 11 | 131,780,334 | <i>NTM</i> <sup>†</sup>    | TSS1500                    |
| cg23710218 | 8  | 72,756,656  | <i>MSC</i>                 | Gene body/5'UTR/1st exon   |
| cg23715830 | 3  | 13,974,614  | <i>FGD5P1</i>              | Gene body/1st exon         |
| cg23727983 | 11 | 125,774,082 | <i>DDX25</i> <sup>†</sup>  | TSS200                     |
| cg23758305 | 8  | 70,982,867  | <i>PRDM14</i> *            | Gene body/5'UTR/1st intron |
| cg23861668 | 11 | 20,691,126  | <i>NELLI</i> <sup>†</sup>  | Gene body/5'UTR/1st exon   |
| cg23880816 | 9  | 137,967,018 | <i>OLFM1</i> <sup>†</sup>  | TSS200                     |
| cg23915769 | 5  | 115,297,488 | <i>LVRN</i>                | TSS1500                    |
| cg23944251 | 10 | 25,464,719  | <i>GPR158</i>              | Gene body/1st exon         |
| cg23989821 | 14 | 60,952,405  | <i>C14orf39</i>            | Gene body/5'UTR/1st intron |
| cg24031355 | 10 | 22,634,439  | <i>SPAG6</i> <sup>†</sup>  | Gene body/5'UTR/1st exon   |
| cg24052359 | 7  | 156,813,574 | <i>N/A</i>                 |                            |
| cg24083324 | 1  | 214,162,604 | <i>PROX1</i> *             | Gene body/5'UTR/1st intron |
| cg24129977 | 2  | 1,748,872   | <i>PXDN</i>                | TSS1500                    |
| cg24169669 | 14 | 38,092,080  | <i>TTC6</i> <sup>†</sup>   | Gene body                  |
| cg24171907 | 2  | 68,546,579  | <i>CNRIP1</i> <sup>†</sup> | Gene body/5'UTR/1st exon   |
| cg24217356 | 12 | 3,600,220   | <i>PRMT8</i>               | TSS200                     |
| cg24242823 | 7  | 24,323,675  | <i>NPY</i>                 | TSS200                     |
| cg24244752 | 4  | 46,391,728  | <i>GABRA2</i>              | TSS200                     |
| cg24249411 | 11 | 27,744,759  | <i>BDNF</i>                | TSS1500                    |
| cg24272305 | 1  | 196,577,741 | <i>KCNT2</i>               | TSS200                     |
| cg24284973 | 11 | 131,780,357 | <i>NTM</i> <sup>†</sup>    | TSS1500                    |
| cg24390913 | 10 | 118,899,788 | <i>N/A</i>                 |                            |
| cg24393316 | 9  | 100,616,469 | <i>FOXE1</i> *             | Gene body/1st exon         |
| cg24405999 | 3  | 133,393,119 | <i>TF</i>                  | Gene body/5'UTR/1st intron |
| cg24424545 | 10 | 101,089,592 | <i>CNNM1</i>               | Gene body/1st exon         |
| cg24459951 | 20 | 57,090,236  | <i>APCDDIL-AS1</i>         | TSS200                     |
| cg24506862 | 18 | 35,146,670  | <i>CELF4</i> <sup>†</sup>  | TSS1500                    |
| cg24572358 | 6  | 123,317,008 | <i>CLVS2</i>               | TSS200                     |
| cg24589459 | 2  | 198,651,347 | <i>BOLL</i> <sup>†</sup>   | TSS1500                    |
| cg24631970 | 8  | 11,059,029  | <i>XKR6</i>                | TSS200                     |
| cg24636477 | 10 | 48,439,229  | <i>GDF10</i>               | TSS200                     |
| cg24646414 | 8  | 11,565,725  | <i>GATA4</i> *             | Gene body/5'UTR/1st exon   |
| cg24659054 | 10 | 134,600,656 | <i>NKX6-2</i> *            | TSS1500                    |

|            |    |             |                           |                            |
|------------|----|-------------|---------------------------|----------------------------|
| cg24668736 | 8  | 65,490,184  | <i>LOC401463</i>          | TSS1500                    |
| cg24687051 | 6  | 73,332,073  | <i>KCNQ5</i>              | Gene body/1st exon         |
| cg24727399 | 4  | 122,302,265 | <i>QRFR</i>               | TSS200                     |
| cg24728018 | 6  | 123,317,875 | <i>CLVS2</i>              | Gene body/5'UTR/1st exon   |
| cg24771804 | 18 | 55,107,755  | <i>ONECUT2*</i>           | Gene body/1st intron       |
| cg24783642 | 3  | 157,261,006 | <i>PQLC2L</i>             | TSS200                     |
| cg24851539 | 14 | 48,143,959  | <i>MDGA2</i>              | Gene body/5'UTR/1st exon   |
| cg24873464 | 3  | 2,139,977   | <i>CNTN4<sup>†</sup></i>  | TSS1500                    |
| cg24899822 | 2  | 193,059,899 | <i>TMEFF2<sup>†</sup></i> | TSS1500                    |
| cg24909548 | 19 | 36,736,272  | <i>N/A</i>                |                            |
| cg24946597 | 8  | 31,497,464  | <i>NRG1</i>               | Gene body/5'UTR/1st exon   |
| cg24990212 | 8  | 65,710,790  | <i>CYP7B1</i>             | Gene body/1st intron       |
| cg25023275 | 18 | 35,146,450  | <i>CELF4<sup>†</sup></i>  | TSS1500                    |
| cg25061843 | 9  | 1,042,970   | <i>N/A</i>                |                            |
| cg25090499 | 13 | 26,043,165  | <i>ATP8A2</i>             | Gene body                  |
| cg25090972 | 7  | 156,797,988 | <i>MNX1-AS2</i>           | TSS1500                    |
| cg25145765 | 4  | 46,391,392  | <i>GABRA2</i>             | Gene body/5'UTR/1st exon   |
| cg25156688 | 11 | 27,744,054  | <i>BDNF</i>               | TSS1500                    |
| cg25181651 | 2  | 1,748,132   | <i>PXDN</i>               | Gene body/1st exon         |
| cg25191628 | 1  | 50,886,949  | <i>DMRTA2</i>             | Gene body                  |
| cg25212493 | 1  | 221,067,717 | <i>N/A</i>                |                            |
| cg25277187 | 14 | 52,535,028  | <i>NID2<sup>†</sup></i>   | Gene body/1st intron       |
| cg25287257 | 7  | 156,798,258 | <i>MNX1-AS2</i>           | TSS1500                    |
| cg25291138 | 10 | 7,451,822   | <i>SFMBT2</i>             | TSS1500                    |
| cg25307318 | 10 | 123,923,081 | <i>TACC2<sup>†</sup></i>  | Gene body/5'UTR/1st exon   |
| cg25457956 | 11 | 27,743,664  | <i>BDNF</i>               | TSS200                     |
| cg25480785 | 4  | 4,765,389   | <i>LOC101928279</i>       | Gene body/1st intron       |
| cg25485875 | 10 | 134,600,998 | <i>NKX6-2*</i>            | TSS1500                    |
| cg25496678 | 10 | 118,899,407 | <i>N/A</i>                |                            |
| cg25526673 | 12 | 22,094,270  | <i>N/A</i>                |                            |
| cg25556905 | 14 | 24,803,925  | <i>ADCY4</i>              | Gene body/5'UTR/1st intron |
| cg25591794 | 13 | 28,554,842  | <i>URAD</i>               | Gene body/1st intron       |
| cg25622366 | 2  | 63,281,139  | <i>OTX1*</i>              | Gene body                  |
| cg25627226 | 18 | 4,455,337   | <i>DLGAPI<sup>†</sup></i> | TSS200                     |
| cg25773267 | 20 | 61,992,187  | <i>CHRNA4</i>             | Gene body/5'UTR/1st intron |
| cg25792518 | 17 | 48,545,950  | <i>ACSF2</i>              | Gene body/1st intron       |
| cg25832771 | 8  | 72,756,058  | <i>MSC-AS1</i>            | TSS1500                    |
| cg25842285 | 10 | 101,089,972 | <i>CNNM1</i>              | Gene body/1st exon         |
| cg25861340 | 5  | 524,683     | <i>SLC9A3</i>             | TSS200                     |
| cg25884711 | 7  | 24,323,840  | <i>NPY</i>                | Gene body/5'UTR/1st exon   |
| cg25958283 | 18 | 11,752,089  | <i>GNAL</i>               | Gene body/5'UTR/1st intron |
| cg25973534 | 5  | 5,139,853   | <i>CTD-2297D10.2</i>      | Gene body/1st intron       |
| cg26000619 | 19 | 2,251,067   | <i>AMH</i>                | Gene body                  |
| cg26001902 | 2  | 108,602,979 | <i>SLC5A7</i>             | Gene body/5'UTR/1st exon   |
| cg26019112 | 11 | 31,821,313  | <i>PAX6*</i>              | Gene body                  |
| cg26029734 | 11 | 31,819,380  | <i>PAX6*</i>              | Gene body                  |
| cg26083180 | 6  | 99,272,089  | <i>N/A</i>                |                            |
| cg26132298 | 14 | 60,952,933  | <i>C14orf39</i>           | TSS200                     |
| cg26267854 | 10 | 44,880,562  | <i>CXCL12</i>             | TSS200                     |
| cg26293546 | 1  | 214,162,659 | <i>PROX1*</i>             | Gene body/5'UTR/1st intron |
| cg26296488 | 4  | 9,783,192   | <i>DRD5</i>               | TSS200                     |
| cg26360792 | 2  | 43,019,997  | <i>HAAO</i>               | TSS1500                    |
| cg26371731 | 1  | 156,390,240 | <i>MIR9-1</i>             | TSS200                     |
| cg26379859 | 11 | 58,672,888  | <i>GLYATL1</i>            | Gene body/5'UTR/1st exon   |
| cg26384430 | 4  | 156,129,655 | <i>NPY2R</i>              | TSS200                     |
| cg26394244 | 14 | 52,536,066  | <i>NID2<sup>†</sup></i>   | TSS200                     |
| cg26429925 | 15 | 83,953,775  | <i>BNCI*</i>              | TSS1500                    |
| cg26433102 | 6  | 391,441     | <i>IRF4*</i>              | TSS1500                    |
| cg26452056 | 10 | 131,770,909 | <i>N/A</i>                |                            |
| cg26484372 | 7  | 27,282,939  | <i>EVX1*</i>              | Gene body/5'UTR/1st exon   |
| cg26490272 | 8  | 72,756,153  | <i>MSC-AS1</i>            | TSS200                     |
| cg26525127 | 2  | 233,350,365 | <i>ECEL1</i>              | Gene body                  |
| cg26531023 | 5  | 135,265,920 | <i>FBXL21</i>             | TSS200                     |
| cg26667205 | 20 | 56,803,778  | <i>ANKRD60</i>            | TSS200                     |
| cg26667356 | 12 | 65,218,078  | <i>TBC1D30</i>            | TSS1500                    |
| cg26675876 | 8  | 11,059,176  | <i>XKR6</i>               | TSS1500                    |

|            |    |             |                             |                            |
|------------|----|-------------|-----------------------------|----------------------------|
| cg26706380 | 14 | 48,144,186  | <i>MDGA2</i>                | TSS200                     |
| cg26721264 | 18 | 74,961,727  | <i>GALR1</i>                | TSS1500                    |
| cg26734696 | 16 | 25,703,830  | <i>HS3ST4</i>               | Gene body/1st exon         |
| cg26763727 | 3  | 2,140,171   | <i>CNTN4</i> <sup>†</sup>   | TSS1500                    |
| cg26799209 | 8  | 72,754,953  | <i>MSC-AS1</i>              | TSS1500                    |
| cg26814276 | 4  | 172,734,266 | <i>GALNTL6</i>              | TSS1500                    |
| cg26858704 | 12 | 4,918,848   | <i>KCNA6</i>                | Gene body/5'UTR/1st exon   |
| cg26860935 | 4  | 1,407,989   | <i>N/A</i>                  |                            |
| cg26888672 | 10 | 105,655,116 | <i>STN1</i> <sup>†</sup>    | Gene body                  |
| cg26895768 | 3  | 188,850,350 | <i>N/A</i>                  |                            |
| cg26918812 | 11 | 131,780,882 | <i>NTM</i> <sup>†</sup>     | Gene body/5'UTR/1st exon   |
| cg26954968 | 6  | 100,903,561 | <i>SIMI</i> *               | Gene body/1st intron       |
| cg26963356 | 6  | 55,443,833  | <i>HMGCLL1</i>              | Gene body/1st exon         |
| cg27014380 | 3  | 133,393,454 | <i>TF</i>                   | Gene body/5'UTR/1st intron |
| cg27019126 | 18 | 56,940,693  | <i>RAX</i> *                | TSS200                     |
| cg27034576 | 10 | 118,031,654 | <i>GFRA1</i>                | Gene body/5'UTR/1st exon   |
| cg27101125 | 19 | 17,392,770  | <i>ANKLE1</i>               | Gene body/1st exon         |
| cg27129172 | 4  | 122,301,963 | <i>QRFPR</i>                | Gene body/5'UTR/1st exon   |
| cg27134386 | 4  | 46,392,485  | <i>GABRA2</i>               | TSS1500                    |
| cg27142536 | 11 | 20,618,198  | <i>N/A</i>                  |                            |
| cg27175819 | 3  | 137,490,436 | <i>LINC01210</i>            | TSS1500                    |
| cg27189087 | 18 | 56,941,246  | <i>RAX</i> *                | TSS1500                    |
| cg27194966 | 6  | 73,331,355  | <i>KCNQ5</i>                | TSS1500                    |
| cg27207308 | 20 | 47,935,683  | <i>N/A</i>                  |                            |
| cg27230697 | 11 | 58,673,577  | <i>GLYTL1</i>               | Gene body/5'UTR/1st intron |
| cg27234067 | 11 | 32,460,799  | <i>WT1-AS</i>               | Gene body                  |
| cg27234864 | 13 | 21,295,941  | <i>IL17D</i>                | Gene body                  |
| cg27252696 | 6  | 100,912,940 | <i>SIMI</i> *               | TSS1500                    |
| cg27299406 | 2  | 43,020,013  | <i>HAAO</i>                 | TSS1500                    |
| cg27301032 | 13 | 112,721,425 | <i>SOX1</i> *               | TSS1500                    |
| cg27357571 | 21 | 34,398,226  | <i>OLIG2</i>                | Gene body/5'UTR/1st exon   |
| cg27360326 | 13 | 53,422,691  | <i>PCDH8</i> <sup>†</sup>   | Gene body/5'UTR/1st exon   |
| cg27362302 | 18 | 11,751,497  | <i>GNAL</i>                 | Gene body/5'UTR/1st exon   |
| cg27363829 | 3  | 164,914,614 | <i>SLITRK3</i> <sup>†</sup> | Gene body/5'UTR/1st exon   |
| cg27398547 | 14 | 60,952,738  | <i>CI4orf39</i>             | Gene body/5'UTR/1st exon   |
| cg27493151 | 19 | 38,701,994  | <i>DPF1</i> <sup>†</sup>    | Gene body/3'UTR            |
| cg27513573 | 10 | 131,768,098 | <i>N/A</i>                  |                            |
| cg27541078 | 4  | 37,245,717  | <i>NWD2</i>                 | TSS1500                    |
| cg27555582 | 12 | 22,094,009  | <i>N/A</i>                  |                            |
| cg27579953 | 12 | 72,667,150  | <i>TRHDE-AS1</i>            | Gene body/1st exon         |
| cg27583690 | 10 | 134,599,823 | <i>NKX6-2</i> *             | TSS1500                    |
| cg27621340 | 15 | 89,346,269  | <i>ACAN</i> <sup>†</sup>    | TSS1500                    |
| cg27634876 | 14 | 52,735,485  | <i>PTGDR</i>                | Gene body/1st intron       |
| cg27649239 | 15 | 68,120,393  | <i>SKOR1</i> <sup>†</sup>   | Gene body                  |
| cg27655158 | 4  | 1,396,593   | <i>N/A</i>                  |                            |
| cg22822760 | 8  | 145,925,954 | <i>N/A</i>                  |                            |
| cg14037665 | 2  | 1,748,617   | <i>PXDN</i>                 | TSS1500                    |
| cg16257091 | 11 | 27,743,580  | <i>BDNF</i>                 | Gene body/5'UTR/1st exon   |
| cg08717030 | 5  | 76,933,163  | <i>OTP</i> *                | Gene body/1st intron       |
| cg12684209 | 6  | 393,110     | <i>IRF4</i> *               | Gene body/5'UTR            |

<sup>a</sup>Probe ID of the Infinium MethylationEPIC BeadChip. <sup>b</sup>National Center for Biotechnology Information (NCBI) database (Genome Build 37). <sup>c</sup>N/A, not annotated (designed for the intergenic regions). <sup>d</sup>Probe CpG sites were annotated as (a) from 200 bp upstream of the transcription start site (TSS) to 1500 bp upstream of it (TSS1500), (b) from TSS to 200 bp upstream of TSS (TSS200), (c) the 5' untranslated region (UTR), (d) the first exon, (e) the first intron, (f) the gene body (TSS to transcription termination site), (g) the 3' UTR and (h) the intergenic region based on the RefSeq database (<http://www.ncbi.nlm.nih.gov/refseq/>). Based on the MetaCore software, transcription factors and genetic binding proteins are indicated by \* and †, respectively.
