# Supplementary material for: Genome-wide DNA methylation profile of early-onset endometrial cancer: its correlation with genetic aberrations and comparison with late-onset endometrial cancer
Source: PubMed Central journal article supplement — Carcinogenesis. 2019 Mar 9;40(5):611–23. doi: 10.1093/carcin/bgz046 (PMC6610171; doi:10.1093/carcin/bgz046), 2019-03-09
Supplement: bgz046_suppl_supplementary_table_s5.pdf [file bgz046_suppl_supplementary_table_s5.pdf]

**Supplementary Table 5.** All statistically significant GO Molecular functions revealed by MetaCore software analysis using 371 genes, for which the 1,034 probes showing different DNA methylation levels between 34 samples of early-onset endometrioid endometrial cancer tissue (EE) (patient age <40 yr) and 40 samples of late-onset endometrioid endometrial cancer tissue (LE) were designed (listed in Supplementary Table 4).

| Molecular functions                                                                                             | <i>P</i> value         |
|-----------------------------------------------------------------------------------------------------------------|------------------------|
| sequence-specific DNA binding                                                                                   | $2.05 \times 10^{-19}$ |
| transcription factor activity, sequence-specific DNA binding                                                    | $2.39 \times 10^{-19}$ |
| nucleic acid binding transcription factor activity                                                              | $2.48 \times 10^{-19}$ |
| RNA polymerase II transcription factor activity, sequence-specific DNA binding                                  | $3.14 \times 10^{-16}$ |
| DNA binding                                                                                                     | $2.05 \times 10^{-10}$ |
| transcription regulatory region sequence-specific DNA binding                                                   | $2.15 \times 10^{-10}$ |
| transcription factor activity, RNA polymerase II core promoter proximal region sequence-specific binding        | $2.81 \times 10^{-10}$ |
| neurokinin receptor binding                                                                                     | $5.08 \times 10^{-10}$ |
| substance P receptor binding                                                                                    | $5.08 \times 10^{-10}$ |
| sequence-specific double-stranded DNA binding                                                                   | $7.65 \times 10^{-10}$ |
| transcription regulatory region DNA binding                                                                     | $9.47 \times 10^{-10}$ |
| regulatory region DNA binding                                                                                   | $1.01 \times 10^{-9}$  |
| regulatory region nucleic acid binding                                                                          | $1.13 \times 10^{-9}$  |
| neuropeptide receptor activity                                                                                  | $3.30 \times 10^{-9}$  |
| gated channel activity                                                                                          | $6.48 \times 10^{-9}$  |
| double-stranded DNA binding                                                                                     | $7.49 \times 10^{-9}$  |
| RNA polymerase II regulatory region sequence-specific DNA binding                                               | $9.49 \times 10^{-9}$  |
| voltage-gated potassium channel activity                                                                        | $1.06 \times 10^{-8}$  |
| RNA polymerase II regulatory region DNA binding                                                                 | $1.19 \times 10^{-8}$  |
| transcriptional activator activity, RNA polymerase II transcription regulatory region sequence-specific binding | $1.24 \times 10^{-8}$  |
| voltage-gated cation channel activity                                                                           | $2.12 \times 10^{-8}$  |
| channel activity                                                                                                | $2.71 \times 10^{-8}$  |
| passive transmembrane transporter activity                                                                      | $2.82 \times 10^{-8}$  |
| core promoter proximal region sequence-specific DNA binding                                                     | $2.93 \times 10^{-8}$  |
| core promoter proximal region DNA binding                                                                       | $3.18 \times 10^{-8}$  |
| ion channel activity                                                                                            | $6.07 \times 10^{-8}$  |
| transcriptional activator activity, RNA polymerase II core promoter proximal region sequence-specific binding   | $6.58 \times 10^{-8}$  |
| RNA polymerase II core promoter proximal region sequence-specific DNA binding                                   | $7.36 \times 10^{-8}$  |
| substrate-specific channel activity                                                                             | $1.00 \times 10^{-7}$  |
| transcription factor activity, RNA polymerase II distal enhancer sequence-specific binding                      | $1.09 \times 10^{-7}$  |
| binding                                                                                                         | $2.83 \times 10^{-7}$  |
| voltage-gated channel activity                                                                                  | $3.99 \times 10^{-7}$  |
| voltage-gated ion channel activity                                                                              | $3.99 \times 10^{-7}$  |
| potassium channel activity                                                                                      | $4.31 \times 10^{-7}$  |
| potassium ion transmembrane transporter activity                                                                | $9.24 \times 10^{-7}$  |
| cation channel activity                                                                                         | $1.58 \times 10^{-6}$  |
| neuropeptide receptor binding                                                                                   | $1.76 \times 10^{-6}$  |
| metal ion transmembrane transporter activity                                                                    | $2.29 \times 10^{-6}$  |
| neuroligin family protein binding                                                                               | $2.47 \times 10^{-6}$  |
| calcium channel regulator activity                                                                              | $2.74 \times 10^{-6}$  |
| inorganic cation transmembrane transporter activity                                                             | $2.78 \times 10^{-6}$  |
| transmitter-gated ion channel activity                                                                          | $6.50 \times 10^{-6}$  |
| transmitter-gated channel activity                                                                              | $6.50 \times 10^{-6}$  |
| transcriptional repressor activity, RNA polymerase II transcription regulatory region sequence-specific binding | $8.00 \times 10^{-6}$  |
| G-protein coupled peptide receptor activity                                                                     | $8.02 \times 10^{-6}$  |
| ligand-gated channel activity                                                                                   | $8.55 \times 10^{-6}$  |
| ligand-gated ion channel activity                                                                               | $8.55 \times 10^{-6}$  |
| peptide receptor activity                                                                                       | $9.70 \times 10^{-6}$  |
| neurotransmitter receptor activity                                                                              | $1.19 \times 10^{-5}$  |
| HMG box domain binding                                                                                          | $1.39 \times 10^{-5}$  |
| channel regulator activity                                                                                      | $1.49 \times 10^{-5}$  |

|                                                                                                               |                       |
|---------------------------------------------------------------------------------------------------------------|-----------------------|
| neuropeptide Y receptor activity                                                                              | $2.39 \times 10^{-5}$ |
| ion channel regulator activity                                                                                | $3.16 \times 10^{-5}$ |
| ligand-gated anion channel activity                                                                           | $3.31 \times 10^{-5}$ |
| ion transmembrane transporter activity                                                                        | $3.46 \times 10^{-5}$ |
| nucleic acid binding                                                                                          | $4.18 \times 10^{-5}$ |
| GABA-gated chloride ion channel activity                                                                      | $5.19 \times 10^{-5}$ |
| cation transmembrane transporter activity                                                                     | $5.42 \times 10^{-5}$ |
| monovalent inorganic cation transmembrane transporter activity                                                | $7.30 \times 10^{-5}$ |
| extracellular ligand-gated ion channel activity                                                               | $9.13 \times 10^{-5}$ |
| transcriptional repressor activity, RNA polymerase II core promoter proximal region sequence-specific binding | $1.00 \times 10^{-4}$ |
| transmembrane transporter activity                                                                            | $1.35 \times 10^{-4}$ |
| substrate-specific transmembrane transporter activity                                                         | $1.38 \times 10^{-4}$ |
| substrate-specific transporter activity                                                                       | $3.40 \times 10^{-4}$ |
| cation binding                                                                                                | $7.63 \times 10^{-4}$ |
| transporter activity                                                                                          | $8.28 \times 10^{-4}$ |
| organic cyclic compound binding                                                                               | $9.76 \times 10^{-4}$ |
| ammonium ion binding                                                                                          | $1.14 \times 10^{-3}$ |
| receptor binding                                                                                              | $1.29 \times 10^{-3}$ |
| ligand-gated cation channel activity                                                                          | $1.72 \times 10^{-3}$ |
| heterocyclic compound binding                                                                                 | $1.76 \times 10^{-3}$ |
| somatostatin receptor activity                                                                                | $1.88 \times 10^{-3}$ |
| peptide YY receptor activity                                                                                  | $1.88 \times 10^{-3}$ |
| protein dimerization activity                                                                                 | $1.94 \times 10^{-3}$ |
| E-box binding                                                                                                 | $2.07 \times 10^{-3}$ |
| GABA-A receptor activity                                                                                      | $2.20 \times 10^{-3}$ |
| protein heterodimerization activity                                                                           | $2.41 \times 10^{-3}$ |
| delayed rectifier potassium channel activity                                                                  | $2.56 \times 10^{-3}$ |
| chromatin binding                                                                                             | $2.61 \times 10^{-3}$ |
| cyclic nucleotide binding                                                                                     | $2.73 \times 10^{-3}$ |
| pancreatic polypeptide receptor activity                                                                      | $2.80 \times 10^{-3}$ |
| polypeptide N-acetylgalactosaminyltransferase activity                                                        | $2.96 \times 10^{-3}$ |
| GABA receptor activity                                                                                        | $3.39 \times 10^{-3}$ |
| activating transcription factor binding                                                                       | $3.52 \times 10^{-3}$ |
| transmembrane receptor activity                                                                               | $3.85 \times 10^{-3}$ |
| neuropeptide binding                                                                                          | $3.86 \times 10^{-3}$ |
| benzodiazepine receptor activity                                                                              | $3.88 \times 10^{-3}$ |
| amino acid binding                                                                                            | $3.96 \times 10^{-3}$ |
| enhancer sequence-specific DNA binding                                                                        | $4.25 \times 10^{-3}$ |
| metal ion binding                                                                                             | $4.51 \times 10^{-3}$ |
| [heparan sulfate]-glucosamine 3-sulfotransferase 1 activity                                                   | $5.13 \times 10^{-3}$ |
| drug binding                                                                                                  | $5.15 \times 10^{-3}$ |
| G-protein coupled receptor binding                                                                            | $5.86 \times 10^{-3}$ |
| glutamate receptor activity                                                                                   | $6.12 \times 10^{-3}$ |
| neurotransmitter binding                                                                                      | $6.12 \times 10^{-3}$ |
| cAMP binding                                                                                                  | $6.78 \times 10^{-3}$ |
| ferrous iron binding                                                                                          | $6.78 \times 10^{-3}$ |
| chloride channel activity                                                                                     | $7.06 \times 10^{-3}$ |
| transcription factor activity, transcription factor binding                                                   | $7.07 \times 10^{-3}$ |
| excitatory extracellular ligand-gated ion channel activity                                                    | $7.21 \times 10^{-3}$ |
| enhancer binding                                                                                              | $7.60 \times 10^{-3}$ |
| AT DNA binding                                                                                                | $8.09 \times 10^{-3}$ |
| iron ion transmembrane transporter activity                                                                   | $8.09 \times 10^{-3}$ |
| co-receptor binding                                                                                           | $8.09 \times 10^{-3}$ |
| transcription factor activity, protein binding                                                                | $8.39 \times 10^{-3}$ |
| protein binding                                                                                               | $8.42 \times 10^{-3}$ |
| protein domain specific binding                                                                               | $9.66 \times 10^{-3}$ |

|                                                                                    |                      |
|------------------------------------------------------------------------------------|----------------------|
| inhibitory extracellular ligand-gated ion channel activity                         | 9.79×10 <sup>3</sup> |
| transcription corepressor activity                                                 | 0.010                |
| transmembrane signaling receptor activity                                          | 0.012                |
| co-SMAD binding                                                                    | 0.017                |
| transcription cofactor activity                                                    | 0.017                |
| transcription factor binding                                                       | 0.013                |
| chloride transmembrane transporter activity                                        | 0.013                |
| signal transducer activity                                                         | 0.014                |
| growth hormone secretagogue receptor activity                                      | 0.014                |
| thyroxine 5-deiodinase activity                                                    | 0.014                |
| 3-hydroxyanthranilate 3,4-dioxygenase activity                                     | 0.014                |
| pituitary adenylate cyclase activating polypeptide activity                        | 0.014                |
| suramin binding                                                                    | 0.014                |
| pituitary adenylate cyclase-activating polypeptide receptor binding                | 0.014                |
| intracellular sodium activated potassium channel activity                          | 0.014                |
| neuropeptide Y receptor binding                                                    | 0.014                |
| thyrotropin-releasing hormone activity                                             | 0.014                |
| choline:sodium symporter activity                                                  | 0.014                |
| cysteine dioxygenase activity                                                      | 0.014                |
| [heparan sulfate]-glucosamine 3-sulfotransferase 2 activity                        | 0.014                |
| glutamine N-acyltransferase activity                                               | 0.014                |
| acetylgalactosaminyltransferase activity                                           | 0.015                |
| chromatin DNA binding                                                              | 0.015                |
| chemoattractant activity                                                           | 0.016                |
| receptor activity                                                                  | 0.017                |
| molecular transducer activity                                                      | 0.017                |
| protein phosphatase 2A binding                                                     | 0.017                |
| anion channel activity                                                             | 0.017                |
| growth factor activity                                                             | 0.018                |
| protein kinase A catalytic subunit binding                                         | 0.018                |
| signaling receptor activity                                                        | 0.019                |
| glycine binding                                                                    | 0.020                |
| guanylate kinase activity                                                          | 0.020                |
| dopamine binding                                                                   | 0.020                |
| 3',5'-cyclic-AMP phosphodiesterase activity                                        | 0.020                |
| calcium-dependent protein binding                                                  | 0.023                |
| heparan sulfate sulfotransferase activity                                          | 0.023                |
| gamma-catenin binding                                                              | 0.023                |
| transcriptional repressor activity, RNA polymerase II transcription factor binding | 0.024                |
| BRE binding                                                                        | 0.028                |
| prostaglandin J receptor activity                                                  | 0.028                |
| glycine-gated chloride ion channel activity                                        | 0.028                |
| trivalent inorganic cation transmembrane transporter activity                      | 0.028                |
| volume-sensitive chloride channel activity                                         | 0.028                |
| neurotrophin TRKB receptor binding                                                 | 0.028                |
| ferric iron transmembrane transporter activity                                     | 0.028                |
| toxin activity                                                                     | 0.028                |
| hydroxymethylglutaryl-CoA lyase activity                                           | 0.028                |
| oxysterol 7-alpha-hydroxylase activity                                             | 0.028                |
| prostaglandin D receptor activity                                                  | 0.028                |
| ionotropic glutamate receptor activity                                             | 0.028                |
| extracellular-glutamate-gated ion channel activity                                 | 0.028                |
| protein kinase A regulatory subunit binding                                        | 0.031                |
| catecholamine binding                                                              | 0.031                |
| protein phosphatase binding                                                        | 0.032                |
| metallopeptidase activity                                                          | 0.032                |

|                                                                                                  |       |
|--------------------------------------------------------------------------------------------------|-------|
| protein kinase A binding                                                                         | 0.034 |
| protein homodimerization activity                                                                | 0.036 |
| neurotransmitter:sodium symporter activity                                                       | 0.037 |
| transforming growth factor beta receptor binding                                                 | 0.039 |
| transcription factor activity, RNA polymerase II transcription factor binding                    | 0.040 |
| protein phosphatase 1 binding                                                                    | 0.040 |
| integrin binding                                                                                 | 0.041 |
| thyroxine 5'-deiodinase activity                                                                 | 0.041 |
| cannabinoid receptor activity                                                                    | 0.041 |
| dopamine:sodium symporter activity                                                               | 0.041 |
| phenylalanine 4-monooxygenase activity                                                           | 0.041 |
| calcium- and calmodulin-regulated 3',5'-cyclic-GMP phosphodiesterase activity                    | 0.041 |
| calmodulin-dependent cyclic-nucleotide phosphodiesterase activity                                | 0.041 |
| glial cell-derived neurotrophic factor receptor activity                                         | 0.041 |
| vasoactive intestinal polypeptide receptor activity                                              | 0.041 |
| glutamate decarboxylase activity                                                                 | 0.041 |
| inward rectifier potassium channel activity                                                      | 0.044 |
| 3',5'-cyclic-nucleotide phosphodiesterase activity                                               | 0.044 |
| acetylcholine receptor binding                                                                   | 0.044 |
| metalloaminopeptidase activity                                                                   | 0.044 |
| ion channel binding                                                                              | 0.044 |
| phosphatidylinositol bisphosphate binding                                                        | 0.047 |
| cyclic-nucleotide phosphodiesterase activity                                                     | 0.047 |
| phospholipid-translocating ATPase activity                                                       | 0.047 |
| transmitter-gated ion channel activity involved in regulation of postsynaptic membrane potential | 0.047 |
| carbon-carbon lyase activity                                                                     | 0.049 |

---
