# Supplementary material for: Genome-wide DNA methylation profile of early-onset endometrial cancer: its correlation with genetic aberrations and comparison with late-onset endometrial cancer
Source: PubMed Central journal article supplement — Carcinogenesis. 2019 Mar 9;40(5):611–23. doi: 10.1093/carcin/bgz046 (PMC6610171; doi:10.1093/carcin/bgz046), 2019-03-09
Supplement: bgz046_suppl_supplementary_table_s6.pdf [file bgz046_suppl_supplementary_table_s6.pdf]

**Supplementary Table 6.** The 2,908 probes showing significant differences in DNA methylation levels between 19 samples of early-onset endometrioid endometrial cancer tissue (EE) (patient age <40 yr) with somatic mutations of the *CTNNB1* gene (CTNNB1-M) and 15 EE samples without such mutations (CTNNB1-W) (Welch's t test  $P < 0.01$  and  $\Delta\beta_{CTNNB1-M-CTNNB1-W}$  value of more than 0.15 or less than -0.15).

| Target ID <sup>a</sup> | Chromosome | Position <sup>b</sup> | Gene symbol <sup>c</sup> | Gene region <sup>d</sup>   |
|------------------------|------------|-----------------------|--------------------------|----------------------------|
| cg00002426             | 3          | 57,743,543            | <i>SLMAP</i>             | Gene body/1st exon         |
| cg00015930             | 1          | 46,921,746            | <i>N/A</i>               |                            |
| cg00017221             | 1          | 149,719,536           | <i>LOC101929798</i>      | TSS200                     |
| cg00025751             | 13         | 102,376,107           | <i>FGF14</i>             | Gene body                  |
| cg00033165             | 4          | 169,952,114           | <i>N/A</i>               |                            |
| cg00043076             | 4          | 8,443,777             | <i>TRMT44</i>            | Gene body/1st intron       |
| cg00044103             | 12         | 53,565,451            | <i>CSAD</i>              | Gene body                  |
| cg00059041             | 20         | 10,838,139            | <i>N/A</i>               |                            |
| cg00061306             | 17         | 73,933,841            | <i>FBF1</i>              | Gene body/1st intron       |
| cg00066640             | 15         | 44,251,516            | <i>FRMD5</i>             | Gene body/5'UTR            |
| cg00083833             | 16         | 50,583,273            | <i>NKD1</i>              | Gene body                  |
| cg00090787             | 15         | 66,795,345            | <i>SNORD16</i>           | TSS200                     |
| cg00094333             | 20         | 47,933,724            | <i>N/A</i>               |                            |
| cg00112588             | 1          | 178,061,945           | <i>RASAL2</i>            | TSS1500                    |
| cg00121963             | 1          | 209,663,736           | <i>N/A</i>               |                            |
| cg00122659             | 1          | 179,801,627           | <i>N/A</i>               |                            |
| cg00130947             | 6          | 129,677,367           | <i>LAMA2</i>             | Gene body                  |
| cg00154957             | 1          | 109,850,562           | <i>MYBPHL</i>            | TSS1500                    |
| cg00157656             | 8          | 644,663               | <i>ERICH1</i>            | Gene body                  |
| cg00162492             | 1          | 221,014,404           | <i>HLX-AS1</i>           | Gene body/1st intron       |
| cg00162633             | 2          | 239,538,919           | <i>N/A</i>               |                            |
| cg00163198             | 11         | 130,767,760           | <i>SNX19</i>             | Gene body                  |
| cg00163372             | 8          | 128,752,988           | <i>MYC</i>               | Gene body                  |
| cg00176210             | 8          | 41,654,967            | <i>ANK1</i>              | Gene body/1st intron       |
| cg00180666             | 20         | 56,283,207            | <i>PMEPA1</i>            | Gene body/1st intron       |
| cg00185066             | 13         | 80,910,763            | <i>SPRY2</i>             | Gene body/3'UTR            |
| cg00190330             | 13         | 50,702,184            | <i>DLEU1</i>             | Gene body                  |
| cg00211232             | 5          | 168,939,760           | <i>N/A</i>               |                            |
| cg00225196             | 8          | 37,556,863            | <i>ZNF703</i>            | Gene body/3'UTR            |
| cg00230837             | 5          | 9,714,909             | <i>LINC02112</i>         | Gene body                  |
| cg00249576             | 6          | 28,412,636            | <i>ZSCAN23</i>           | TSS1500                    |
| cg00253428             | 12         | 105,772,603           | <i>N/A</i>               |                            |
| cg00255699             | 1          | 40,307,257            | <i>TRIT1</i>             | Gene body                  |
| cg00260810             | 3          | 183,894,469           | <i>AP2M1</i>             | Gene body/5'UTR/1st intron |
| cg00261082             | 2          | 209,563,429           | <i>LOC101927960</i>      | Gene body                  |
| cg00275449             | 3          | 195,162,127           | <i>ACAP2</i>             | Gene body/1st intron       |
| cg00284720             | 21         | 27,258,179            | <i>APP</i>               | Gene body                  |
| cg00285089             | 21         | 42,608,493            | <i>BACE2</i>             | Gene body                  |
| cg00291006             | 15         | 26,056,773            | <i>ATP10A</i>            | Gene body/1st intron       |
| cg00292029             | 6          | 36,703,127            | <i>N/A</i>               |                            |
| cg00294892             | 19         | 18,080,492            | <i>KCNN1</i>             | Gene body/5'UTR            |
| cg00304631             | 1          | 246,132,849           | <i>SMYD3</i>             | Gene body                  |
| cg00305629             | 9          | 117,265,998           | <i>WHRN</i>              | TSS1500                    |
| cg00310940             | 1          | 9,129,648             | <i>SLC2A5</i>            | Gene body/5'UTR/1st exon   |
| cg00322918             | 20         | 53,253,707            | <i>DOK5</i>              | Gene body                  |
| cg00328219             | 8          | 29,033,680            | <i>KIF13B</i>            | Gene body                  |
| cg00348992             | 1          | 245,365,165           | <i>KIF26B</i>            | Gene body                  |
| cg00386408             | 5          | 135,364,970           | <i>TGFBI</i>             | Gene body/1st intron       |
| cg00391821             | 1          | 10,566,887            | <i>PEX14</i>             | Gene body                  |
| cg00402547             | 18         | 6,835,382             | <i>ARHGAP28</i>          | Gene body/5'UTR/1st intron |

|            |    |             |                     |                            |
|------------|----|-------------|---------------------|----------------------------|
| cg00411203 | 5  | 57,753,407  | <i>PLK2</i>         | Gene body                  |
| cg00411896 | 1  | 202,884,780 | <i>KLHL12</i>       | Gene body                  |
| cg00417408 | 7  | 150,497,740 | <i>TMEM176A</i>     | TSS200                     |
| cg00423291 | 7  | 40,855,639  | <i>SUGCT</i>        | Gene body                  |
| cg00427023 | 1  | 17,770,076  | <i>N/A</i>          |                            |
| cg00431187 | 7  | 27,161,749  | <i>HOXA-AS2</i>     | Gene body/1st intron       |
| cg00457239 | 1  | 209,538,232 | <i>N/A</i>          |                            |
| cg00464757 | 4  | 3,288,648   | <i>N/A</i>          |                            |
| cg00469015 | 15 | 69,744,684  | <i>RPLP1</i>        | TSS1500                    |
| cg00485203 | 17 | 54,945,376  | <i>DGKE</i>         | Gene body/3'UTR            |
| cg00494665 | 12 | 65,218,728  | <i>TBC1D30</i>      | Gene body/1st exon         |
| cg00507564 | 6  | 168,332,967 | <i>AFDN</i>         | Gene body                  |
| cg00530592 | 8  | 37,639,753  | <i>N/A</i>          |                            |
| cg00554616 | 16 | 79,747,651  | <i>N/A</i>          |                            |
| cg00562118 | 4  | 644,805     | <i>PDE6B</i>        | Gene body                  |
| cg00562855 | 2  | 12,256,279  | <i>MIR3681HG</i>    | Gene body                  |
| cg00572756 | 7  | 157,863,106 | <i>PTPRN2</i>       | Gene body                  |
| cg00598204 | 17 | 79,961,522  | <i>ASPSCR1</i>      | Gene body                  |
| cg00603288 | 8  | 145,103,942 | <i>N/A</i>          |                            |
| cg00622689 | 3  | 141,944,946 | <i>GK5</i>          | TSS1500                    |
| cg00637172 | 10 | 7,069,696   | <i>N/A</i>          |                            |
| cg00638407 | 2  | 80,471,121  | <i>CTNNA2</i>       | Gene body                  |
| cg00671269 | 4  | 21,792,865  | <i>KCNIP4</i>       | Gene body/5'UTR/1st intron |
| cg00676304 | 2  | 233,517,221 | <i>EFHD1</i>        | Gene body/1st intron       |
| cg00684984 | 6  | 129,748,720 | <i>LAMA2</i>        | Gene body                  |
| cg00685038 | 9  | 133,970,508 | <i>AIF1L</i>        | TSS1500                    |
| cg00689534 | 15 | 79,282,030  | <i>RASGRF1</i>      | Gene body                  |
| cg00689585 | 6  | 167,450,864 | <i>FGFR1OP</i>      | Gene body                  |
| cg00691874 | 17 | 1,521,312   | <i>SLC43A2</i>      | Gene body                  |
| cg00716083 | 3  | 46,506,554  | <i>LTF</i>          | Gene body/5'UTR/1st exon   |
| cg00727310 | 2  | 227,662,704 | <i>IRS1</i>         | Gene body/1st exon         |
| cg00729011 | 1  | 232,630,798 | <i>SIPAIL2</i>      | Gene body/1st intron       |
| cg00737840 | 11 | 125,036,420 | <i>PKNOX2</i>       | Gene body/5'UTR/1st intron |
| cg00741900 | 14 | 102,027,797 | <i>DIO3</i>         | Gene body/5'UTR/1st exon   |
| cg00748253 | 10 | 30,471,419  | <i>N/A</i>          |                            |
| cg00755791 | 10 | 75,768,461  | <i>VCL</i>          | Gene body/1st intron       |
| cg00777079 | 17 | 1,666,607   | <i>SERPINF1</i>     | Gene body/5'UTR/1st intron |
| cg00795186 | 1  | 54,959,387  | <i>N/A</i>          |                            |
| cg00795397 | 14 | 87,113,901  | <i>N/A</i>          |                            |
| cg00810583 | 2  | 169,402,543 | <i>CERS6</i>        | Gene body/1st intron       |
| cg00828439 | 10 | 80,193,635  | <i>N/A</i>          |                            |
| cg00829435 | 17 | 53,972,916  | <i>N/A</i>          |                            |
| cg00830283 | 1  | 145,743,676 | <i>PDZK1</i>        | Gene body/5'UTR/1st intron |
| cg00833605 | 8  | 53,027,281  | <i>ST18</i>         | Gene body                  |
| cg00852844 | 9  | 89,178,579  | <i>N/A</i>          |                            |
| cg00866527 | 11 | 111,506,278 | <i>SIK2</i>         | Gene body                  |
| cg00876273 | 10 | 94,452,311  | <i>HHEX</i>         | Gene body                  |
| cg00892353 | 8  | 124,247,948 | <i>C8orf76</i>      | Gene body                  |
| cg00909953 | 17 | 19,574,966  | <i>ALDH3A2</i>      | Gene body                  |
| cg00912573 | 2  | 227,661,291 | <i>IRS1</i>         | Gene body/1st exon         |
| cg00921344 | 1  | 170,464,254 | <i>LOC101928650</i> | Gene body/1st intron       |
| cg00922522 | 12 | 130,918,862 | <i>RIMBP2</i>       | Gene body                  |
| cg00952822 | 8  | 144,571,936 | <i>ZC3H3</i>        | Gene body                  |
| cg00954105 | 17 | 63,739,259  | <i>CEP112</i>       | Gene body                  |
| cg00956759 | 17 | 30,023,399  | <i>N/A</i>          |                            |
| cg00960088 | 9  | 114,600,634 | <i>N/A</i>          |                            |

|            |    |             |                  |                            |
|------------|----|-------------|------------------|----------------------------|
| cg00961640 | 1  | 110,933,767 | <i>SLC16A4</i>   | TSS200                     |
| cg00965897 | 4  | 17,029,606  | <i>N/A</i>       |                            |
| cg00967347 | 9  | 66,741,307  | <i>N/A</i>       |                            |
| cg00970325 | 3  | 142,683,176 | <i>PAQR9-AS1</i> | Gene body/1st intron       |
| cg00976111 | 14 | 55,153,114  | <i>SAMD4A</i>    | Gene body/1st intron       |
| cg00977403 | 16 | 1,585,720   | <i>TMEM204</i>   | Gene body/1st intron       |
| cg00980058 | 1  | 233,248,709 | <i>PCNX2</i>     | Gene body                  |
| cg00981633 | 19 | 47,124,171  | <i>PTGIR</i>     | Gene body/3'UTR            |
| cg01000622 | 16 | 23,407,360  | <i>COG7</i>      | Gene body                  |
| cg01020413 | 2  | 66,810,487  | <i>LINC01798</i> | Gene body/1st intron       |
| cg01042246 | 2  | 171,572,902 | <i>SP5</i>       | Gene body                  |
| cg01043196 | 16 | 68,362,223  | <i>PRMT7</i>     | Gene body                  |
| cg01055834 | 4  | 84,483,139  | <i>GPAT3</i>     | Gene body                  |
| cg01059513 | 7  | 99,653,211  | <i>ZSCAN21</i>   | Gene body/5'UTR/1st intron |
| cg01076495 | 1  | 150,480,588 | <i>ECM1</i>      | Gene body/5'UTR/1st exon   |
| cg01089498 | 4  | 11,428,985  | <i>HS3ST1</i>    | Gene body/5'UTR/1st intron |
| cg01100951 | 4  | 15,453,598  | <i>N/A</i>       |                            |
| cg01118724 | 4  | 121,722,338 | <i>PRDM5</i>     | Gene body                  |
| cg01124048 | 4  | 166,177,198 | <i>KLHL2</i>     | Gene body                  |
| cg01173821 | 9  | 132,337,640 | <i>N/A</i>       |                            |
| cg01183384 | 9  | 716,332     | <i>KANK1</i>     | Gene body                  |
| cg01195241 | 6  | 33,714,703  | <i>IP6K3</i>     | Gene body/5'UTR/1st exon   |
| cg01198033 | 7  | 155,302,342 | <i>CNPY1</i>     | Gene body/5'UTR/1st intron |
| cg01204128 | 8  | 6,321,629   | <i>MCPH1</i>     | Gene body                  |
| cg01209126 | 10 | 105,499,415 | <i>SH3PXD2A</i>  | Gene body                  |
| cg01232138 | 19 | 42,437,425  | <i>N/A</i>       |                            |
| cg01245722 | 4  | 186,695,899 | <i>SORBS2</i>    | Gene body/5'UTR            |
| cg01252949 | 5  | 66,650,334  | <i>N/A</i>       |                            |
| cg01257194 | 9  | 116,161,247 | <i>ALAD</i>      | Gene body/5'UTR/1st intron |
| cg01257975 | 22 | 40,058,706  | <i>CACNA1I</i>   | Gene body                  |
| cg01268930 | 8  | 21,342,616  | <i>N/A</i>       |                            |
| cg01276610 | 1  | 110,934,108 | <i>SLC16A4</i>   | TSS1500                    |
| cg01285863 | 16 | 89,049,227  | <i>N/A</i>       |                            |
| cg01302562 | 12 | 130,998,679 | <i>RIMBP2</i>    | Gene body/5'UTR            |
| cg01308736 | 5  | 140,358,237 | <i>PCDHAC2</i>   | Gene body/1st intron       |
| cg01313259 | 13 | 111,892,794 | <i>ARHGEF7</i>   | TSS1500                    |
| cg01321497 | 21 | 25,260,444  | <i>N/A</i>       |                            |
| cg01326173 | 1  | 164,614,103 | <i>PBX1</i>      | Gene body/1st intron       |
| cg01327984 | 9  | 120,297,619 | <i>N/A</i>       |                            |
| cg01329005 | 19 | 17,516,712  | <i>MVB12A</i>    | Gene body/5'UTR/1st intron |
| cg01333011 | 12 | 28,124,665  | <i>PTHLH</i>     | Gene body/5'UTR/1st intron |
| cg01336446 | 17 | 63,289,897  | <i>N/A</i>       |                            |
| cg01348970 | 17 | 42,581,598  | <i>GPATCH8</i>   | TSS1500                    |
| cg01351300 | 4  | 114,873,079 | <i>ARSJ</i>      | Gene body/5'UTR            |
| cg01356139 | 7  | 40,925,162  | <i>N/A</i>       |                            |
| cg01391680 | 10 | 33,411,269  | <i>N/A</i>       |                            |
| cg01402561 | 1  | 187,840,215 | <i>N/A</i>       |                            |
| cg01405910 | 8  | 27,587,757  | <i>N/A</i>       |                            |
| cg01413848 | 1  | 3,081,226   | <i>PRDM16</i>    | Gene body/1st intron       |
| cg01415826 | 13 | 101,753,209 | <i>NALCN</i>     | Gene body                  |
| cg01424562 | 14 | 69,256,677  | <i>ZFP36L1</i>   | Gene body                  |
| cg01427231 | 13 | 102,051,141 | <i>NALCN</i>     | Gene body                  |
| cg01427630 | 16 | 13,270,646  | <i>SHISA9</i>    | Gene body                  |
| cg01429340 | 13 | 31,553,556  | <i>N/A</i>       |                            |
| cg01441041 | 16 | 19,448,742  | <i>TMC5</i>      | Gene body/5'UTR            |
| cg01441421 | 7  | 36,909,953  | <i>ELMO1</i>     | Gene body                  |

|            |    |             |                    |                            |
|------------|----|-------------|--------------------|----------------------------|
| cg01446492 | 15 | 85,859,864  | <i>N/A</i>         |                            |
| cg01449663 | 17 | 8,926,249   | <i>NTN1</i>        | Gene body                  |
| cg01461846 | 3  | 150,440,743 | <i>N/A</i>         |                            |
| cg01468344 | 16 | 72,282,262  | <i>N/A</i>         |                            |
| cg01478179 | 4  | 187,630,905 | <i>FAT1</i>        | Gene body                  |
| cg01480180 | 7  | 90,896,329  | <i>FZD1</i>        | Gene body/1st exon/3'UTR   |
| cg01484296 | 17 | 6,796,941   | <i>ALOX12P2</i>    | TSS200                     |
| cg01487683 | 6  | 5,031,084   | <i>LYRM4-ASI</i>   | Gene body/1st intron       |
| cg01491926 | 14 | 62,506,700  | <i>SYT16</i>       | Gene body/1st intron       |
| cg01492170 | 16 | 27,781,295  | <i>KIAA0556</i>    | Gene body                  |
| cg01518790 | 20 | 9,823,348   | <i>N/A</i>         |                            |
| cg01529076 | 14 | 75,746,735  | <i>FOS</i>         | Gene body                  |
| cg01531398 | 8  | 90,973,757  | <i>NBN</i>         | Gene body                  |
| cg01539510 | 6  | 159,650,954 | <i>FNDCl</i>       | Gene body                  |
| cg01542423 | 8  | 126,668,119 | <i>N/A</i>         |                            |
| cg01546047 | 4  | 1,167,409   | <i>SPON2</i>       | TSS1500                    |
| cg01561916 | 2  | 43,020,169  | <i>HAAO</i>        | TSS1500                    |
| cg01562648 | 9  | 16,601,397  | <i>BNC2</i>        | Gene body                  |
| cg01565803 | 1  | 159,684,664 | <i>CRP</i>         | TSS1500                    |
| cg01568899 | 2  | 12,454,300  | <i>MIR3681HG</i>   | Gene body                  |
| cg01569664 | 13 | 110,434,016 | <i>IRS2</i>        | Gene body/1st intron       |
| cg01571735 | 2  | 171,572,900 | <i>SP5</i>         | Gene body                  |
| cg01574673 | 1  | 156,595,164 | <i>HAPLN2</i>      | Gene body                  |
| cg01581024 | 8  | 142,009,794 | <i>PTK2</i>        | Gene body/5'UTR/1st intron |
| cg01584478 | 4  | 151,307,115 | <i>LRBA</i>        | Gene body                  |
| cg01592108 | 2  | 175,830,522 | <i>CHN1</i>        | Gene body/1st intron       |
| cg01603550 | 3  | 11,609,735  | <i>VGLL4</i>       | Gene body/1st intron       |
| cg01617933 | 7  | 29,316,555  | <i>CHN2</i>        | Gene body/1st intron       |
| cg01632381 | 20 | 55,325,650  | <i>N/A</i>         |                            |
| cg01633438 | 10 | 104,615,952 | <i>BORCS7-ASMT</i> | Gene body/1st intron       |
| cg01651680 | 6  | 32,913,068  | <i>N/A</i>         |                            |
| cg01652514 | 13 | 114,831,142 | <i>RASA3</i>       | Gene body                  |
| cg01656880 | 11 | 65,253,396  | <i>N/A</i>         |                            |
| cg01657856 | 6  | 128,103,342 | <i>THEMIS</i>      | Gene body                  |
| cg01664864 | 14 | 102,027,677 | <i>DIO3</i>        | TSS200                     |
| cg01675423 | 12 | 32,279,843  | <i>BICD1</i>       | Gene body/1st intron       |
| cg01705981 | 20 | 24,097,440  | <i>N/A</i>         |                            |
| cg01715025 | 1  | 145,683,323 | <i>RNF115</i>      | Gene body                  |
| cg01718139 | 19 | 54,566,838  | <i>VSTM1</i>       | Gene body/5'UTR/1st intron |
| cg01735235 | 6  | 152,135,407 | <i>ESR1</i>        | Gene body/5'UTR/1st intron |
| cg01738213 | 10 | 104,723,301 | <i>CNNM2</i>       | Gene body/1st intron       |
| cg01739960 | 15 | 96,715,164  | <i>NR2F2-ASI</i>   | Gene body                  |
| cg01742187 | 9  | 6,566,568   | <i>GLDC</i>        | Gene body                  |
| cg01772439 | 5  | 149,012,102 | <i>ARHGEF37</i>    | Gene body/3'UTR            |
| cg01776278 | 7  | 149,472,049 | <i>SSPO</i>        | TSS1500                    |
| cg01858698 | 1  | 46,954,407  | <i>N/A</i>         |                            |
| cg01861257 | 2  | 237,520,134 | <i>N/A</i>         |                            |
| cg01861913 | 3  | 61,550,569  | <i>PTPRG</i>       | Gene body/1st intron       |
| cg01866431 | 12 | 129,417,669 | <i>GLT1D1</i>      | Gene body                  |
| cg01871533 | 20 | 37,614,741  | <i>DHX35</i>       | Gene body                  |
| cg01879195 | 18 | 26,728,044  | <i>N/A</i>         |                            |
| cg01879805 | 3  | 142,683,164 | <i>PAQR9-ASI</i>   | Gene body/1st intron       |
| cg01882604 | 20 | 42,478,815  | <i>N/A</i>         |                            |
| cg01890568 | 17 | 31,437,649  | <i>ASIC2</i>       | Gene body                  |
| cg01900755 | 6  | 64,350,180  | <i>PHF3</i>        | Gene body/5'UTR/1st intron |
| cg01957222 | 2  | 1,426,786   | <i>TPO</i>         | Gene body/1st intron       |

|            |    |             |                  |                            |
|------------|----|-------------|------------------|----------------------------|
| cg01959429 | 5  | 176,764,224 | <i>LMAN2</i>     | Gene body                  |
| cg01960979 | 16 | 1,611,342   | <i>IFT140</i>    | Gene body                  |
| cg01963144 | 3  | 129,088,182 | <i>N/A</i>       |                            |
| cg01966732 | 7  | 130,580,290 | <i>LINC-PINT</i> | Gene body                  |
| cg01982827 | 11 | 9,599,270   | <i>WEE1</i>      | Gene body                  |
| cg01986767 | 16 | 50,425,351  | <i>LINC02178</i> | Gene body/1st intron       |
| cg01987516 | 10 | 101,282,726 | <i>N/A</i>       |                            |
| cg02002355 | 2  | 130,573,197 | <i>N/A</i>       |                            |
| cg02003272 | 13 | 50,702,719  | <i>DLEU1</i>     | Gene body                  |
| cg02008229 | 15 | 90,346,089  | <i>ANPEP</i>     | Gene body                  |
| cg02008818 | 3  | 170,625,519 | <i>EIF5A2</i>    | Gene body                  |
| cg02025435 | 16 | 89,986,317  | <i>MC1R</i>      | Gene body/1st exon         |
| cg02031676 | 12 | 29,820,132  | <i>TMTC1</i>     | Gene body                  |
| cg02046247 | 12 | 1,662,459   | <i>N/A</i>       |                            |
| cg02049405 | 6  | 30,095,265  | <i>N/A</i>       |                            |
| cg02049672 | 21 | 42,622,633  | <i>BACE2</i>     | Gene body                  |
| cg02059055 | 6  | 18,390,303  | <i>RNF144B</i>   | Gene body/5'UTR/1st intron |
| cg02071172 | 3  | 64,430,000  | <i>N/A</i>       |                            |
| cg02071553 | 2  | 56,229,060  | <i>MIR216B</i>   | TSS1500                    |
| cg02077216 | 5  | 57,753,951  | <i>PLK2</i>      | Gene body                  |
| cg02077648 | 1  | 8,456,619   | <i>RERE</i>      | Gene body/5'UTR            |
| cg02088996 | 7  | 41,817,771  | <i>INHBA-AS1</i> | Gene body                  |
| cg02101355 | 11 | 121,970,694 | <i>MIR125B1</i>  | TSS200                     |
| cg02103401 | 3  | 37,033,373  | <i>EPM2AIP1</i>  | Gene body/1st exon         |
| cg02108623 | 6  | 106,535,425 | <i>PRDM1</i>     | Gene body/1st intron       |
| cg02137702 | 17 | 19,574,962  | <i>ALDH3A2</i>   | Gene body                  |
| cg02142935 | 4  | 17,075,823  | <i>N/A</i>       |                            |
| cg02156526 | 6  | 24,934,269  | <i>RIPOR2</i>    | Gene body/1st intron       |
| cg02165556 | 4  | 121,684,361 | <i>PRDM5</i>     | Gene body                  |
| cg02180189 | 11 | 2,710,486   | <i>KCNQ1OT1</i>  | Gene body/1st exon         |
| cg02183930 | 20 | 18,885,007  | <i>N/A</i>       |                            |
| cg02195296 | 8  | 72,171,928  | <i>EYA1</i>      | Gene body                  |
| cg02209237 | 6  | 158,909,452 | <i>TULP4</i>     | Gene body                  |
| cg02209667 | 16 | 75,272,754  | <i>BCAR1</i>     | TSS200                     |
| cg02211013 | 17 | 10,703,074  | <i>TMEM238L</i>  | Gene body/1st intron       |
| cg02218200 | 22 | 51,135,138  | <i>SHANK3</i>    | Gene body                  |
| cg02222324 | 2  | 10,231,621  | <i>N/A</i>       |                            |
| cg02227036 | 16 | 50,425,329  | <i>LINC02178</i> | Gene body/1st intron       |
| cg02229993 | 1  | 166,134,699 | <i>FAM78B</i>    | Gene body/1st intron       |
| cg02244695 | 7  | 150,497,346 | <i>TMEM176B</i>  | Gene body/5'UTR/1st intron |
| cg02247178 | 13 | 31,506,687  | <i>TEX26-AS1</i> | Gene body/1st exon         |
| cg02259324 | 15 | 78,111,196  | <i>LINGO1</i>    | Gene body/5'UTR/1st intron |
| cg02264288 | 6  | 18,990,796  | <i>N/A</i>       |                            |
| cg02267270 | 6  | 37,616,410  | <i>MDGA1</i>     | Gene body                  |
| cg02269207 | 12 | 120,433,323 | <i>BICDL1</i>    | Gene body/1st intron       |
| cg02269984 | 15 | 60,429,806  | <i>N/A</i>       |                            |
| cg02287710 | 14 | 102,027,660 | <i>DIO3</i>      | TSS200                     |
| cg02298907 | 18 | 53,072,243  | <i>TCF4</i>      | TSS1500                    |
| cg02302745 | 2  | 221,989,631 | <i>N/A</i>       |                            |
| cg02315899 | 8  | 36,919,614  | <i>N/A</i>       |                            |
| cg02317848 | 21 | 45,137,152  | <i>N/A</i>       |                            |
| cg02318139 | 5  | 100,240,048 | <i>ST8SIA4</i>   | TSS1500                    |
| cg02335993 | 11 | 132,456,520 | <i>OPCML</i>     | Gene body                  |
| cg02340116 | 8  | 54,089,593  | <i>N/A</i>       |                            |
| cg02341737 | 3  | 141,944,952 | <i>GK5</i>       | TSS1500                    |
| cg02354431 | 7  | 128,423,266 | <i>N/A</i>       |                            |

|            |    |             |                    |                            |
|------------|----|-------------|--------------------|----------------------------|
| cg02382037 | 12 | 130,823,570 | <i>PIWIL1</i>      | Gene body/5'UTR/1st intron |
| cg02394506 | 8  | 102,161,951 | <i>N/A</i>         |                            |
| cg02408464 | 11 | 103,746,841 | <i>N/A</i>         |                            |
| cg02408775 | 12 | 48,206,848  | <i>HDAC7</i>       | Gene body/1st intron       |
| cg02420480 | 7  | 41,919,892  | <i>N/A</i>         |                            |
| cg02423587 | 1  | 36,059,379  | <i>TFAP2E</i>      | Gene body                  |
| cg02432272 | 13 | 43,537,831  | <i>EPSTH1</i>      | Gene body                  |
| cg02454526 | 7  | 101,232,286 | <i>N/A</i>         |                            |
| cg02536756 | 2  | 7,547,450   | <i>N/A</i>         |                            |
| cg02538783 | 10 | 35,102,505  | <i>PARD3</i>       | Gene body/1st intron       |
| cg02544392 | 7  | 40,459,219  | <i>SUGCT</i>       | Gene body                  |
| cg02552250 | 13 | 49,066,868  | <i>RCBTB2</i>      | Gene body                  |
| cg02556146 | 6  | 139,764,657 | <i>N/A</i>         |                            |
| cg02574374 | 10 | 114,163,611 | <i>ACSL5</i>       | Gene body                  |
| cg02580820 | 12 | 33,759,790  | <i>N/A</i>         |                            |
| cg02608914 | 2  | 171,784,720 | <i>GORASP2</i>     | TSS1500                    |
| cg02620403 | 5  | 110,404,837 | <i>TSLP</i>        | TSS1500                    |
| cg02625086 | 4  | 109,086,398 | <i>LEF1</i>        | Gene body/1st intron       |
| cg02639958 | 13 | 30,843,564  | <i>KATNAL1</i>     | Gene body                  |
| cg02643468 | 2  | 23,422,464  | <i>N/A</i>         |                            |
| cg02643677 | 3  | 69,997,232  | <i>MITF</i>        | Gene body                  |
| cg02663945 | 1  | 861,629     | <i>SAMD11</i>      | Gene body                  |
| cg02676167 | 2  | 66,810,606  | <i>LINC01798</i>   | Gene body/1st intron       |
| cg02687786 | 4  | 16,971,135  | <i>N/A</i>         |                            |
| cg02695349 | 7  | 38,269,241  | <i>STARD3NL</i>    | Gene body/3'UTR            |
| cg02703404 | 1  | 47,152,720  | <i>EFCAB14-AS1</i> | Gene body                  |
| cg02704535 | 6  | 31,783,315  | <i>HSPA1A</i>      | Gene body/5'UTR/1st exon   |
| cg02705837 | 17 | 7,554,666   | <i>ATP1B2</i>      | Gene body/5'UTR/1st exon   |
| cg02729383 | 7  | 130,625,473 | <i>N/A</i>         |                            |
| cg02730303 | 11 | 103,480,630 | <i>N/A</i>         |                            |
| cg02800280 | 11 | 36,233,408  | <i>LDLRAD3</i>     | Gene body                  |
| cg02807788 | 18 | 34,021,730  | <i>FHOD3</i>       | Gene body                  |
| cg02812487 | 12 | 125,577,625 | <i>AACS</i>        | Gene body                  |
| cg02821073 | 3  | 71,049,028  | <i>FOXP1</i>       | Gene body                  |
| cg02833808 | 12 | 32,825,307  | <i>N/A</i>         |                            |
| cg02837945 | 10 | 76,968,350  | <i>N/A</i>         |                            |
| cg02840823 | 14 | 102,027,681 | <i>DIO3</i>        | TSS200                     |
| cg02863252 | 12 | 124,455,049 | <i>CCDC92</i>      | Gene body/5'UTR/1st intron |
| cg02879363 | 5  | 180,627,216 | <i>TRIM7</i>       | Gene body/5'UTR/1st exon   |
| cg02881169 | 16 | 19,856,778  | <i>IQCK</i>        | Gene body                  |
| cg02889400 | 3  | 46,506,559  | <i>LTF</i>         | Gene body/5'UTR/1st exon   |
| cg02892368 | 2  | 65,297,637  | <i>CEP68</i>       | Gene body                  |
| cg02892767 | 7  | 99,697,325  | <i>MCM7</i>        | Gene body/5'UTR            |
| cg02931873 | 9  | 113,189,984 | <i>SVEP1</i>       | Gene body                  |
| cg02966448 | 5  | 173,319,119 | <i>CPEB4</i>       | TSS1500                    |
| cg02998075 | 7  | 41,875,113  | <i>N/A</i>         |                            |
| cg03004860 | 16 | 85,684,468  | <i>GSE1</i>        | Gene body                  |
| cg03013070 | 10 | 95,965,579  | <i>PLCE1</i>       | Gene body                  |
| cg03030717 | 12 | 65,218,069  | <i>TBC1D30</i>     | TSS1500                    |
| cg03036804 | 5  | 55,750,112  | <i>N/A</i>         |                            |
| cg03037850 | 7  | 1,127,175   | <i>GPER1</i>       | TSS1500                    |
| cg03052128 | 12 | 85,671,811  | <i>N/A</i>         |                            |
| cg03065507 | 2  | 112,191,608 | <i>MIR4435-2HG</i> | Gene body/1st intron       |
| cg03073429 | 10 | 125,506,257 | <i>CPXM2</i>       | Gene body/3'UTR            |
| cg03074188 | 8  | 37,557,348  | <i>ZNF703</i>      | Gene body/3'UTR            |
| cg03075441 | 7  | 94,905,743  | <i>PPP1R9A</i>     | Gene body                  |

|            |    |             |                  |                            |
|------------|----|-------------|------------------|----------------------------|
| cg03081045 | 4  | 145,962,699 | <i>ANAPC10</i>   | Gene body                  |
| cg03085443 | 2  | 133,904,880 | <i>NCKAP5</i>    | Gene body                  |
| cg03087247 | 2  | 242,006,772 | <i>SNED1</i>     | Gene body                  |
| cg03087738 | 8  | 104,992,493 | <i>RIMS2</i>     | Gene body                  |
| cg03090524 | 7  | 6,156,044   | <i>USP42</i>     | Gene body                  |
| cg03097389 | 13 | 45,008,447  | <i>TSC22D1</i>   | Gene body/3'UTR            |
| cg03116459 | 2  | 169,402,526 | <i>CERS6</i>     | Gene body/1st intron       |
| cg03129764 | 1  | 159,259,534 | <i>FCER1A</i>    | Gene body/5'UTR/1st exon   |
| cg03132824 | 4  | 3,373,006   | <i>RGS12</i>     | Gene body/1st intron       |
| cg03140889 | 8  | 70,555,135  | <i>SULF1</i>     | Gene body                  |
| cg03143607 | 1  | 199,753,553 | <i>N/A</i>       |                            |
| cg03152500 | 20 | 33,762,673  | <i>PROCR</i>     | Gene body                  |
| cg03160370 | 20 | 53,223,875  | <i>DOK5</i>      | Gene body                  |
| cg03186150 | 1  | 243,579,504 | <i>SDCCAG8</i>   | Gene body                  |
| cg03191054 | 1  | 70,608,004  | <i>N/A</i>       |                            |
| cg03215422 | 5  | 135,266,509 | <i>FBXL21</i>    | Gene body/1st intron       |
| cg03217587 | 2  | 239,403,003 | <i>N/A</i>       |                            |
| cg03244411 | 6  | 99,295,790  | <i>N/A</i>       |                            |
| cg03248158 | 4  | 122,632,918 | <i>N/A</i>       |                            |
| cg03252313 | 7  | 148,117,075 | <i>CNTNAP2</i>   | Gene body/3'UTR            |
| cg03252770 | 4  | 154,354,354 | <i>N/A</i>       |                            |
| cg03252902 | 3  | 98,275,054  | <i>N/A</i>       |                            |
| cg03257255 | 4  | 3,288,876   | <i>N/A</i>       |                            |
| cg03258685 | 12 | 49,334,529  | <i>ARF3</i>      | Gene body                  |
| cg03265268 | 8  | 11,839,764  | <i>DEFB135</i>   | TSS200                     |
| cg03277898 | 7  | 2,518,824   | <i>N/A</i>       |                            |
| cg03279442 | 2  | 163,150,027 | <i>IFIH1</i>     | Gene body                  |
| cg03280839 | 3  | 3,865,730   | <i>LRRN1</i>     | Gene body/5'UTR            |
| cg03293736 | 18 | 35,055,056  | <i>CELF4</i>     | Gene body/5'UTR            |
| cg03297163 | 7  | 2,548,137   | <i>N/A</i>       |                            |
| cg03299269 | 2  | 250,003     | <i>SH3YL1</i>    | Gene body/5'UTR            |
| cg03301671 | 4  | 187,621,790 | <i>FAT1</i>      | Gene body                  |
| cg03309328 | 12 | 99,525,864  | <i>ANKS1B</i>    | Gene body/1st intron       |
| cg03318834 | 10 | 14,716,636  | <i>FAM107B</i>   | Gene body/5'UTR/1st intron |
| cg03323067 | 2  | 218,767,655 | <i>TNS1</i>      | Gene body/5'UTR            |
| cg03330181 | 10 | 134,150,700 | <i>LRRC27</i>    | Gene body/5'UTR/1st exon   |
| cg03330490 | 10 | 94,452,236  | <i>HHEX</i>      | Gene body                  |
| cg03330684 | 9  | 123,919,154 | <i>CNTRL</i>     | Gene body                  |
| cg03346692 | 6  | 127,911,362 | <i>C6orf58</i>   | Gene body                  |
| cg03348540 | 6  | 125,714,101 | <i>N/A</i>       |                            |
| cg03354113 | 10 | 79,396,793  | <i>KCNMA1</i>    | Gene body/1st intron       |
| cg03356877 | 10 | 121,329,990 | <i>N/A</i>       |                            |
| cg03367315 | 17 | 65,585,448  | <i>PITPNC1</i>   | Gene body                  |
| cg03367387 | 3  | 197,439,334 | <i>RUBCN</i>     | Gene body                  |
| cg03369965 | 3  | 169,531,731 | <i>LRRC34</i>    | TSS1500                    |
| cg03380512 | 6  | 107,960,476 | <i>SOBP</i>      | Gene body/3'UTR            |
| cg03384701 | 2  | 12,643,011  | <i>MIR3681HG</i> | Gene body                  |
| cg03391667 | 12 | 130,941,034 | <i>RIMBP2</i>    | Gene body                  |
| cg03396249 | 16 | 65,817,170  | <i>N/A</i>       |                            |
| cg03400397 | 1  | 183,486,832 | <i>SMG7</i>      | Gene body                  |
| cg03401608 | 19 | 49,250,242  | <i>IZUMO1</i>    | TSS200                     |
| cg03418616 | 11 | 70,436,735  | <i>SHANK2</i>    | Gene body                  |
| cg03419885 | 11 | 125,036,385 | <i>PKNOX2</i>    | Gene body/5'UTR/1st intron |
| cg03437151 | 12 | 97,438,029  | <i>N/A</i>       |                            |
| cg03441710 | 15 | 71,787,471  | <i>THSD4</i>     | Gene body                  |
| cg03445929 | 11 | 124,019,442 | <i>N/A</i>       |                            |

|            |    |             |                  |                            |
|------------|----|-------------|------------------|----------------------------|
| cg03460756 | 17 | 45,353,128  | <i>ITGB3</i>     | Gene body                  |
| cg03472898 | 14 | 29,240,992  | <i>LINC01551</i> | TSS1500                    |
| cg03474556 | 1  | 25,674,357  | <i>TMEM50A</i>   | Gene body                  |
| cg03476109 | 2  | 27,408,527  | <i>N/A</i>       |                            |
| cg03487391 | 2  | 219,596,537 | <i>TTL4</i>      | Gene body/5'UTR            |
| cg03496068 | 2  | 70,163,972  | <i>MXD1</i>      | Gene body                  |
| cg03497477 | 17 | 77,086,532  | <i>RBFOX3</i>    | Gene body/3'UTR            |
| cg03507326 | 16 | 2,801,952   | <i>SRRM2</i>     | TSS1500                    |
| cg03515494 | 12 | 8,068,627   | <i>N/A</i>       |                            |
| cg03519783 | 4  | 170,637,934 | <i>CLCN3</i>     | Gene body                  |
| cg03525554 | 12 | 130,613,660 | <i>N/A</i>       |                            |
| cg03537386 | 1  | 32,155,667  | <i>COL16A1</i>   | Gene body                  |
| cg03551377 | 2  | 86,424,249  | <i>IMMT</i>      | TSS1500                    |
| cg03553587 | 3  | 28,616,941  | <i>LINC00693</i> | Gene body/1st intron       |
| cg03562199 | 2  | 28,447,499  | <i>BABAM2</i>    | Gene body                  |
| cg03564338 | 16 | 50,585,384  | <i>NKD1</i>      | Gene body                  |
| cg03570829 | 7  | 90,247,016  | <i>CDK14</i>     | Gene body                  |
| cg03597510 | 3  | 190,041,053 | <i>CLDN1</i>     | TSS1500                    |
| cg03607813 | 12 | 105,948,248 | <i>N/A</i>       |                            |
| cg03609666 | 19 | 49,250,439  | <i>IZUMO1</i>    | TSS1500                    |
| cg03611826 | 10 | 24,738,681  | <i>KIAA1217</i>  | Gene body/5'UTR/1st exon   |
| cg03614132 | 12 | 89,453,916  | <i>N/A</i>       |                            |
| cg03640944 | 10 | 106,093,819 | <i>ITPRIP</i>    | TSS200                     |
| cg03646564 | 5  | 40,909,520  | <i>C7</i>        | Gene body/5'UTR/1st exon   |
| cg03648091 | 22 | 29,317,695  | <i>ZNRF3</i>     | Gene body/5'UTR/1st intron |
| cg03659776 | 18 | 75,898,313  | <i>N/A</i>       |                            |
| cg03673969 | 7  | 133,598,167 | <i>EXOC4</i>     | Gene body                  |
| cg03678062 | 6  | 149,772,716 | <i>ZC3H12D</i>   | Gene body                  |
| cg03691573 | 2  | 214,149,718 | <i>SPAG16</i>    | Gene body/1st intron       |
| cg03708045 | 8  | 48,595,620  | <i>SPIDR</i>     | Gene body                  |
| cg03709892 | 1  | 19,739,396  | <i>CAPZB</i>     | Gene body                  |
| cg03710587 | 17 | 8,193,452   | <i>SLC25A35</i>  | Gene body                  |
| cg03719092 | 8  | 70,744,881  | <i>SLCO5A1</i>   | Gene body/1st exon         |
| cg03719555 | 19 | 4,455,413   | <i>UBXN6</i>     | TSS200                     |
| cg03734750 | 4  | 17,040,881  | <i>N/A</i>       |                            |
| cg03748015 | 13 | 30,963,873  | <i>N/A</i>       |                            |
| cg03795663 | 13 | 42,188,218  | <i>VWA8</i>      | Gene body                  |
| cg03800281 | 10 | 72,097,146  | <i>LRRC20</i>    | Gene body                  |
| cg03801871 | 2  | 30,453,395  | <i>LBH</i>       | TSS1500                    |
| cg03812107 | 11 | 122,849,037 | <i>BSX</i>       | Gene body                  |
| cg03813471 | 3  | 14,290,900  | <i>N/A</i>       |                            |
| cg03814872 | 6  | 7,541,066   | <i>DSP</i>       | TSS1500                    |
| cg03818307 | 1  | 150,480,534 | <i>ECM1</i>      | Gene body/5'UTR/1st exon   |
| cg03821443 | 11 | 1,320,329   | <i>TOLLIP</i>    | Gene body/5'UTR/1st intron |
| cg03835338 | 2  | 204,954,513 | <i>N/A</i>       |                            |
| cg03839717 | 6  | 167,507,762 | <i>N/A</i>       |                            |
| cg03842133 | 12 | 131,005,849 | <i>RIMBP2</i>    | Gene body/5'UTR/1st intron |
| cg03847272 | 11 | 95,564,678  | <i>CEP57</i>     | Gene body/3'UTR            |
| cg03856044 | 1  | 159,557,632 | <i>APCS</i>      | Gene body/5'UTR/1st exon   |
| cg03876548 | 6  | 29,893,605  | <i>HCG4B</i>     | Gene body/1st exon         |
| cg03891346 | 11 | 121,970,725 | <i>MIR125B1</i>  | TSS200                     |
| cg03915052 | 7  | 55,545,852  | <i>VOPPI</i>     | Gene body                  |
| cg03915372 | 5  | 140,557,249 | <i>PCDHB8</i>    | TSS200                     |
| cg03922168 | 17 | 36,943,191  | <i>PIP4K2B</i>   | Gene body/1st intron       |
| cg03927159 | 12 | 123,952,047 | <i>SNRNP35</i>   | Gene body/1st intron       |
| cg03928616 | 10 | 27,737,895  | <i>N/A</i>       |                            |



|            |    |             |                |                            |
|------------|----|-------------|----------------|----------------------------|
| cg03930921 | 11 | 126,301,917 | <i>KIRREL3</i> | Gene body                  |
| cg03933131 | 3  | 46,506,483  | <i>LTF</i>     | Gene body/5'UTR/1st exon   |
| cg03942871 | 7  | 102,574,105 | <i>LRRC17</i>  | Gene body/5'UTR/1st intron |
| cg03948236 | 10 | 128,078,010 | <i>ADAM12</i>  | TSS1500                    |
| cg03986229 | 11 | 94,617,747  | <i>N/A</i>     |                            |
| cg03989507 | 17 | 40,836,125  | <i>CNTNAP1</i> | Gene body                  |
| cg04003264 | 12 | 98,517,260  | <i>N/A</i>     |                            |
| cg04015962 | 1  | 10,949,192  | <i>N/A</i>     |                            |
| cg04018325 | 16 | 14,397,685  | <i>MIR193B</i> | TSS200                     |
| cg04020897 | 3  | 65,112,432  | <i>N/A</i>     |                            |
| cg04021114 | 14 | 70,393,148  | <i>SMOC1</i>   | Gene body/1st intron       |
| cg04026354 | 17 | 2,076,063   | <i>SMG6</i>    | Gene body                  |
| cg04036366 | 17 | 79,976,900  | <i>CENPX</i>   | Gene body/3'UTR            |
| cg04049101 | 3  | 73,047,555  | <i>PPP4R2</i>  | Gene body                  |
| cg04051927 | 2  | 4,183,531   | <i>N/A</i>     |                            |
| cg04054313 | 12 | 129,337,897 | <i>GLT1D1</i>  | TSS200                     |
| cg04055835 | 1  | 201,437,101 | <i>PHLDA3</i>  | Gene body/1st intron       |
| cg04069842 | 6  | 38,814,885  | <i>DNAH8</i>   | Gene body                  |
| cg04105282 | 10 | 99,790,170  | <i>CRTAC1</i>  | Gene body/1st intron       |
| cg04112100 | 2  | 143,701,758 | <i>KYNU</i>    | Gene body                  |
| cg04118124 | 1  | 43,231,249  | <i>P3H1</i>    | Gene body/1st intron       |
| cg04129548 | 2  | 227,662,083 | <i>IRS1</i>    | Gene body/1st exon         |
| cg04134180 | 2  | 221,030,361 | <i>N/A</i>     |                            |
| cg04141796 | 5  | 42,950,062  | <i>N/A</i>     |                            |
| cg04158183 | 6  | 129,748,909 | <i>LAMA2</i>   | Gene body                  |
| cg04159903 | 5  | 42,949,799  | <i>N/A</i>     |                            |
| cg04165759 | 1  | 150,448,943 | <i>RPRD2</i>   | Gene body/3'UTR            |
| cg04178156 | 8  | 90,355,474  | <i>N/A</i>     |                            |
| cg04185676 | 21 | 37,015,294  | <i>N/A</i>     |                            |
| cg04200103 | 7  | 38,457,673  | <i>AMPH</i>    | Gene body                  |
| cg04214430 | 13 | 50,702,707  | <i>DLEU1</i>   | Gene body                  |
| cg04249416 | 17 | 63,589,457  | <i>N/A</i>     |                            |
| cg04260375 | 4  | 16,828,308  | <i>LDB2</i>    | Gene body/1st intron       |
| cg04264726 | 3  | 49,710,768  | <i>APEH</i>    | TSS1500                    |
| cg04281994 | 2  | 232,253,149 | <i>N/A</i>     |                            |
| cg04293307 | 17 | 63,553,581  | <i>AXIN2</i>   | Gene body                  |
| cg04295144 | 19 | 10,407,184  | <i>ICAM5</i>   | Gene body                  |
| cg04299757 | 9  | 133,028,341 | <i>HMCN2</i>   | Gene body/1st exon         |
| cg04301614 | 4  | 37,585,993  | <i>C4orf19</i> | Gene body/5'UTR/1st exon   |
| cg04307216 | 16 | 79,897,930  | <i>N/A</i>     |                            |
| cg04318504 | 6  | 136,869,967 | <i>MAP7</i>    | Gene body/1st intron       |
| cg04319732 | 3  | 107,938,271 | <i>IFT57</i>   | Gene body                  |
| cg04324125 | 20 | 10,615,143  | <i>N/A</i>     |                            |
| cg04328729 | 10 | 521,830     | <i>DIP2C</i>   | Gene body                  |
| cg04329291 | 6  | 74,484,508  | <i>CD109</i>   | Gene body                  |
| cg04344860 | 8  | 5,996,776   | <i>N/A</i>     |                            |
| cg04354671 | 6  | 116,886,211 | <i>N/A</i>     |                            |
| cg04371321 | 7  | 40,509,213  | <i>SUGCT</i>   | Gene body                  |
| cg04371413 | 2  | 207,395,846 | <i>ADAM23</i>  | Gene body                  |
| cg04388919 | 7  | 149,119,133 | <i>N/A</i>     |                            |
| cg04398322 | 2  | 241,991,130 | <i>SNED1</i>   | Gene body                  |
| cg04415672 | 12 | 58,237,706  | <i>CTDSP2</i>  | Gene body/1st intron       |
| cg04442723 | 10 | 29,506,476  | <i>N/A</i>     |                            |
| cg04448700 | 2  | 65,292,223  | <i>CEP68</i>   | Gene body/5'UTR/1st intron |
| cg04452040 | 10 | 102,501,358 | <i>PAX2</i>    | Gene body/1st intron       |
| cg04452437 | 6  | 170,411,595 | <i>N/A</i>     |                            |

|            |    |             |                     |                            |
|------------|----|-------------|---------------------|----------------------------|
| cg04453124 | 10 | 79,596,240  | <i>DLG5</i>         | Gene body                  |
| cg04458053 | 6  | 3,386,102   | <i>SLC22A23</i>     | Gene body                  |
| cg04481534 | 2  | 241,993,367 | <i>SNED1</i>        | Gene body                  |
| cg04501493 | 6  | 35,336,301  | <i>PPARD</i>        | Gene body                  |
| cg04502361 | 5  | 33,228,413  | <i>LINC02160</i>    | TSS1500                    |
| cg04517290 | 18 | 56,487,055  | <i>LINC01926</i>    | Gene body/1st intron       |
| cg04539705 | 2  | 233,384,768 | <i>PRSS56</i>       | TSS1500                    |
| cg04552017 | 19 | 44,384,593  | <i>ZNF404</i>       | TSS1500                    |
| cg04561901 | 4  | 106,729,976 | <i>GSTCD</i>        | Gene body                  |
| cg04564233 | 7  | 157,848,600 | <i>PTPRN2</i>       | Gene body                  |
| cg04564333 | 1  | 244,870,903 | <i>DESI2</i>        | Gene body/3'UTR            |
| cg04569429 | 17 | 37,024,625  | <i>LASP1</i>        | TSS1500                    |
| cg04585669 | 3  | 11,599,640  | <i>VGLL4</i>        | Gene body/3'UTR            |
| cg04609971 | 17 | 74,911,808  | <i>MGAT5B</i>       | Gene body                  |
| cg04635997 | 10 | 119,314,071 | <i>N/A</i>          |                            |
| cg04639868 | 11 | 7,625,224   | <i>PPFIBP2</i>      | Gene body                  |
| cg04654530 | 2  | 63,282,702  | <i>OTX1</i>         | Gene body                  |
| cg04659317 | 15 | 51,359,316  | <i>TNFAIP8L3</i>    | Gene body/1st intron       |
| cg04667656 | 17 | 12,609,782  | <i>LOC101928418</i> | TSS1500                    |
| cg04678902 | 1  | 110,754,737 | <i>KCNC4</i>        | Gene body/1st exon         |
| cg04685962 | 16 | 50,583,729  | <i>NKD1</i>         | Gene body                  |
| cg04689773 | 14 | 92,199,710  | <i>CATSPERB</i>     | TSS1500                    |
| cg04690110 | 6  | 26,556,829  | <i>N/A</i>          |                            |
| cg04717143 | 8  | 37,555,391  | <i>ZNF703</i>       | Gene body                  |
| cg04721069 | 1  | 62,776,972  | <i>KANK4</i>        | Gene body/5'UTR/1st intron |
| cg04737759 | 6  | 155,253,937 | <i>N/A</i>          |                            |
| cg04740981 | 22 | 30,376,085  | <i>MTMR3</i>        | Gene body                  |
| cg04741932 | 10 | 29,516,555  | <i>N/A</i>          |                            |
| cg04757411 | 13 | 76,259,545  | <i>LMO7</i>         | Gene body/1st intron       |
| cg04773591 | 20 | 13,221,109  | <i>ISM1-AS1</i>     | TSS1500                    |
| cg04774597 | 15 | 69,744,390  | <i>RPLP1</i>        | TSS1500                    |
| cg04792216 | 6  | 30,075,057  | <i>TRIM31-AS1</i>   | Gene body/1st intron       |
| cg04792330 | 20 | 21,001,266  | <i>N/A</i>          |                            |
| cg04792712 | 8  | 17,271,105  | <i>MTMR7</i>        | TSS200                     |
| cg04810745 | 2  | 189,064,557 | <i>LINC01090</i>    | Gene body/1st intron       |
| cg04811411 | 1  | 173,834,585 | <i>SNORD79</i>      | TSS200                     |
| cg04823557 | 8  | 104,914,497 | <i>RIMS2</i>        | Gene body                  |
| cg04825327 | 4  | 121,993,098 | <i>NDNF</i>         | Gene body/5'UTR/1st intron |
| cg04850999 | 10 | 77,872,084  | <i>LRMDA</i>        | Gene body                  |
| cg04857881 | 16 | 47,344,826  | <i>ITFG1</i>        | Gene body                  |
| cg04861380 | 7  | 150,497,663 | <i>TMEM176B</i>     | TSS200                     |
| cg04869379 | 13 | 109,610,256 | <i>MYO16</i>        | Gene body                  |
| cg04877240 | 7  | 40,509,625  | <i>SUGCT</i>        | Gene body                  |
| cg04885765 | 2  | 220,991,295 | <i>N/A</i>          |                            |
| cg04887494 | 19 | 2,252,786   | <i>JSRP1</i>        | Gene body                  |
| cg04896706 | 11 | 59,324,587  | <i>N/A</i>          |                            |
| cg04904385 | 7  | 19,158,692  | <i>TWIST1</i>       | TSS1500                    |
| cg04910591 | 3  | 46,506,104  | <i>LTF</i>          | Gene body/1st intron       |
| cg04918831 | 1  | 241,795,170 | <i>CHML</i>         | Gene body/1st exon/3'UTR   |
| cg04919425 | 2  | 5,551,315   | <i>N/A</i>          |                            |
| cg04935278 | 10 | 106,093,830 | <i>ITPRIP</i>       | TSS200                     |
| cg04938109 | 12 | 64,384,670  | <i>SRGAP1</i>       | Gene body                  |
| cg04973839 | 4  | 183,689,078 | <i>TENM3</i>        | Gene body                  |
| cg04986015 | 1  | 171,810,433 | <i>DNM3</i>         | TSS200                     |
| cg04991484 | 2  | 12,499,542  | <i>MIR3681HG</i>    | Gene body                  |
| cg04998327 | 11 | 103,453,960 | <i>N/A</i>          |                            |

|            |    |             |                     |                            |
|------------|----|-------------|---------------------|----------------------------|
| cg05008344 | 6  | 129,761,564 | <i>LAMA2</i>        | Gene body                  |
| cg05017003 | 21 | 45,154,770  | <i>PDXK</i>         | Gene body                  |
| cg05017199 | 7  | 150,497,065 | <i>TMEM176B</i>     | Gene body/5'UTR/1st intron |
| cg05026261 | 9  | 16,728,954  | <i>BNC2</i>         | Gene body/1st intron       |
| cg05046746 | 2  | 1,661,425   | <i>PXDN</i>         | Gene body                  |
| cg05058809 | 16 | 834,201     | <i>N/A</i>          |                            |
| cg05062935 | 2  | 1,740,914   | <i>PXDN</i>         | Gene body/1st intron       |
| cg05065239 | 6  | 18,990,650  | <i>N/A</i>          |                            |
| cg05068636 | 15 | 44,887,664  | <i>SPG11</i>        | Gene body                  |
| cg05083624 | 22 | 40,728,497  | <i>TNRC6B</i>       | Gene body/3'UTR            |
| cg05090351 | 10 | 126,851,162 | <i>N/A</i>          |                            |
| cg05092787 | 1  | 146,719,567 | <i>CHD1L</i>        | Gene body/5'UTR/1st intron |
| cg05096182 | 10 | 6,557,506   | <i>PRKCQ</i>        | Gene body/5'UTR/1st intron |
| cg05098765 | 12 | 68,727,139  | <i>MDMI</i>         | TSS1500                    |
| cg05105226 | 5  | 138,238,954 | <i>CTNNA1</i>       | Gene body                  |
| cg05112555 | 17 | 71,739,385  | <i>LOC100134391</i> | Gene body                  |
| cg05127899 | 6  | 28,911,474  | <i>LINC01556</i>    | TSS200                     |
| cg05141578 | 10 | 104,306,658 | <i>SUFU</i>         | Gene body                  |
| cg05143530 | 3  | 197,439,242 | <i>RUBCN</i>        | Gene body                  |
| cg05147692 | 1  | 159,684,684 | <i>CRP</i>          | TSS1500                    |
| cg05158146 | 5  | 128,734,215 | <i>MIR4460</i>      | TSS1500                    |
| cg05160751 | 1  | 24,192,033  | <i>FUCA1</i>        | Gene body                  |
| cg05180443 | 17 | 48,546,554  | <i>CHAD</i>         | TSS1500                    |
| cg05181516 | 7  | 158,818,108 | <i>LINC00689</i>    | Gene body                  |
| cg05183646 | 6  | 134,491,143 | <i>SGK1</i>         | Gene body/3'UTR            |
| cg05192974 | 6  | 31,795,436  | <i>HSPA1B</i>       | TSS200                     |
| cg05193584 | 6  | 158,302,208 | <i>SNX9</i>         | Gene body                  |
| cg05201536 | 22 | 47,117,668  | <i>CERK</i>         | Gene body/1st intron       |
| cg05232042 | 14 | 55,348,869  | <i>GCHI</i>         | Gene body/1st intron       |
| cg05241015 | 2  | 1,748,876   | <i>PXDN</i>         | TSS1500                    |
| cg05245155 | 20 | 50,548,109  | <i>N/A</i>          |                            |
| cg05255994 | 3  | 139,029,435 | <i>N/A</i>          |                            |
| cg05269013 | 20 | 56,728,520  | <i>C20orf85</i>     | Gene body/1st intron       |
| cg05277504 | 17 | 79,961,614  | <i>ASPSCR1</i>      | Gene body                  |
| cg05284211 | 7  | 41,400,299  | <i>N/A</i>          |                            |
| cg05303690 | 8  | 32,284,962  | <i>NRG1</i>         | Gene body/1st intron       |
| cg05322931 | 17 | 840,950     | <i>NXN</i>          | Gene body/1st intron       |
| cg05331763 | 17 | 80,535,367  | <i>FOXK2</i>        | Gene body                  |
| cg05344902 | 7  | 40,575,355  | <i>SUGCT</i>        | Gene body                  |
| cg05366262 | 1  | 159,670,282 | <i>N/A</i>          |                            |
| cg05367053 | 8  | 107,141,442 | <i>N/A</i>          |                            |
| cg05372982 | 18 | 11,883,211  | <i>GNAL</i>         | Gene body/3'UTR            |
| cg05394352 | 3  | 14,252,550  | <i>N/A</i>          |                            |
| cg05404625 | 7  | 150,497,460 | <i>TMEM176B</i>     | Gene body/5'UTR/1st exon   |
| cg05419003 | 19 | 6,469,914   | <i>DENND1C</i>      | Gene body                  |
| cg05431947 | 11 | 12,621,248  | <i>N/A</i>          |                            |
| cg05432453 | 5  | 57,618,609  | <i>N/A</i>          |                            |
| cg05432959 | 13 | 98,088,254  | <i>RAP2A</i>        | Gene body/1st intron       |
| cg05466976 | 2  | 56,216,938  | <i>MIR216A</i>      | TSS1500                    |
| cg05483448 | 8  | 145,103,484 | <i>N/A</i>          |                            |
| cg05487307 | 12 | 56,434,861  | <i>RPS26</i>        | TSS1500                    |
| cg05500106 | 1  | 183,858,268 | <i>RGLI</i>         | Gene body                  |
| cg05501060 | 8  | 123,146,194 | <i>N/A</i>          |                            |
| cg05518705 | 2  | 1,748,675   | <i>PXDN</i>         | TSS1500                    |
| cg05525809 | 2  | 239,447,772 | <i>LINC01107</i>    | Gene body                  |
| cg05531181 | 9  | 23,672,628  | <i>LOC101929563</i> | TSS1500                    |

|            |    |             |                     |                      |
|------------|----|-------------|---------------------|----------------------|
| cg05555048 | 1  | 68,000,532  | <i>N/A</i>          |                      |
| cg05558712 | 12 | 50,254,150  | <i>N/A</i>          |                      |
| cg05561696 | 10 | 3,149,796   | <i>PFKP</i>         | Gene body            |
| cg05573322 | 12 | 132,514,858 | <i>SNORA49</i>      | TSS1500              |
| cg05573767 | 6  | 167,171,394 | <i>RPS6KA2</i>      | Gene body            |
| cg05578152 | 5  | 137,270,997 | <i>PKD2L2</i>       | Gene body            |
| cg05594286 | 16 | 86,840,467  | <i>N/A</i>          |                      |
| cg05613195 | 12 | 97,417,776  | <i>N/A</i>          |                      |
| cg05620169 | 14 | 34,162,098  | <i>NPAS3</i>        | Gene body            |
| cg05626376 | 6  | 31,938,847  | <i>STK19</i>        | TSS200               |
| cg05627696 | 4  | 16,933,239  | <i>N/A</i>          |                      |
| cg05634047 | 2  | 239,628,943 | <i>N/A</i>          |                      |
| cg05645982 | 8  | 124,219,077 | <i>FAM83A</i>       | Gene body            |
| cg05658920 | 7  | 13,191,068  | <i>N/A</i>          |                      |
| cg05680144 | 19 | 48,627,604  | <i>LIG1</i>         | Gene body            |
| cg05682128 | 3  | 149,685,395 | <i>PFN2</i>         | Gene body            |
| cg05684192 | 22 | 49,192,700  | <i>N/A</i>          |                      |
| cg05694265 | 6  | 129,802,567 | <i>LAMA2</i>        | Gene body            |
| cg05728600 | 22 | 46,869,829  | <i>CELSR1</i>       | Gene body/1st intron |
| cg05752207 | 1  | 193,126,041 | <i>CDC73</i>        | Gene body            |
| cg05754641 | 8  | 70,421,379  | <i>SULF1</i>        | Gene body/5'UTR      |
| cg05758467 | 2  | 240,035,894 | <i>HDAC4</i>        | Gene body            |
| cg05766251 | 17 | 37,024,760  | <i>LASPI</i>        | TSS1500              |
| cg05768044 | 16 | 53,243,559  | <i>CHD9</i>         | Gene body            |
| cg05774672 | 2  | 208,631,916 | <i>FZD5</i>         | Gene body            |
| cg05778935 | 1  | 231,647,942 | <i>N/A</i>          |                      |
| cg05816157 | 1  | 202,935,683 | <i>CYB5R1</i>       | Gene body            |
| cg05820110 | 17 | 1,863,769   | <i>RTN4RL1</i>      | Gene body/1st intron |
| cg05821789 | 11 | 122,848,098 | <i>N/A</i>          |                      |
| cg05846851 | 16 | 10,172,054  | <i>GRIN2A</i>       | Gene body            |
| cg05847196 | 2  | 103,626,032 | <i>N/A</i>          |                      |
| cg05854313 | 10 | 73,450,016  | <i>CDH23</i>        | Gene body            |
| cg05854427 | 2  | 241,992,491 | <i>SNED1</i>        | Gene body            |
| cg05859065 | 20 | 19,975,219  | <i>RIN2</i>         | Gene body            |
| cg05860111 | 5  | 14,441,261  | <i>TRIO</i>         | Gene body            |
| cg05862438 | 7  | 142,920,096 | <i>TAS2R40</i>      | Gene body/1st exon   |
| cg05866304 | 11 | 89,938,492  | <i>CHORDC1</i>      | Gene body            |
| cg05867174 | 3  | 69,058,904  | <i>EOGT</i>         | Gene body            |
| cg05870586 | 2  | 240,196,769 | <i>HDAC4</i>        | Gene body            |
| cg05872034 | 1  | 5,976,040   | <i>NPHP4</i>        | Gene body            |
| cg05875331 | 11 | 100,542,217 | <i>N/A</i>          |                      |
| cg05903736 | 2  | 240,197,131 | <i>HDAC4</i>        | Gene body            |
| cg05919456 | 6  | 3,722,818   | <i>N/A</i>          |                      |
| cg05919685 | 1  | 159,556,997 | <i>APCS</i>         | TSS1500              |
| cg05921699 | 19 | 42,380,725  | <i>CD79A</i>        | TSS1500              |
| cg05922453 | 16 | 50,425,414  | <i>LINC02178</i>    | Gene body/1st intron |
| cg05922752 | 5  | 57,754,103  | <i>PLK2</i>         | Gene body            |
| cg05954002 | 8  | 125,210,194 | <i>LOC101927588</i> | Gene body            |
| cg05974501 | 4  | 121,731,324 | <i>PRDM5</i>        | Gene body            |
| cg05975163 | 7  | 42,656,915  | <i>N/A</i>          |                      |
| cg05977523 | 16 | 1,586,043   | <i>TMEM204</i>      | Gene body/1st intron |
| cg05986111 | 1  | 150,522,965 | <i>ADAMTSL4</i>     | Gene body/5'UTR      |
| cg05986933 | 2  | 43,020,457  | <i>HAAO</i>         | TSS1500              |
| cg05995064 | 7  | 158,844,757 | <i>VIPR2</i>        | Gene body            |
| cg05998333 | 10 | 54,246,879  | <i>N/A</i>          |                      |
| cg05999317 | 16 | 89,397,198  | <i>ANKRD11</i>      | Gene body/5'UTR      |

|            |    |             |                     |                            |
|------------|----|-------------|---------------------|----------------------------|
| cg06000330 | 7  | 19,183,231  | <i>N/A</i>          |                            |
| cg06002802 | 1  | 200,332,539 | <i>LINC00862</i>    | Gene body                  |
| cg06013117 | 5  | 174,153,318 | <i>MSX2</i>         | Gene body/1st intron       |
| cg06016028 | 12 | 110,367,524 | <i>N/A</i>          |                            |
| cg06017405 | 5  | 15,933,965  | <i>MIR887</i>       | TSS1500                    |
| cg06033721 | 1  | 95,339,232  | <i>SLC44A3</i>      | Gene body                  |
| cg06046218 | 8  | 99,257,446  | <i>NIPAL2</i>       | Gene body                  |
| cg06050191 | 4  | 183,696,126 | <i>TENM3</i>        | Gene body                  |
| cg06058902 | 12 | 120,485,234 | <i>BICDL1</i>       | Gene body                  |
| cg06082318 | 13 | 101,630,201 | <i>NALCN-AS1</i>    | Gene body                  |
| cg06098164 | 2  | 214,148,892 | <i>LOC100130451</i> | Gene body/5'UTR/1st exon   |
| cg06100618 | 12 | 131,077,533 | <i>RIMBP2</i>       | Gene body/5'UTR/1st intron |
| cg06105699 | 17 | 79,971,436  | <i>ASPSCR1</i>      | Gene body                  |
| cg06107488 | 14 | 29,253,122  | <i>LINC02282</i>    | Gene body                  |
| cg06127269 | 9  | 116,160,969 | <i>ALAD</i>         | Gene body/5'UTR/1st intron |
| cg06127335 | 2  | 242,011,247 | <i>SNED1</i>        | Gene body                  |
| cg06129427 | 5  | 112,534,963 | <i>MCC</i>          | Gene body/1st intron       |
| cg06134567 | 22 | 46,658,398  | <i>PKDREJ</i>       | Gene body/1st exon         |
| cg06135285 | 17 | 19,675,785  | <i>ULK2</i>         | Gene body/3'UTR            |
| cg06152865 | 1  | 109,373,336 | <i>AKNAD1</i>       | Gene body                  |
| cg06152945 | 12 | 29,303,219  | <i>FAR2</i>         | Gene body/5'UTR/1st intron |
| cg06181703 | 1  | 1,028,878   | <i>C1orf159</i>     | Gene body/5'UTR            |
| cg06192549 | 3  | 183,894,778 | <i>AP2M1</i>        | Gene body/5'UTR            |
| cg06223834 | 16 | 4,103,161   | <i>ADCY9</i>        | Gene body                  |
| cg06224408 | 3  | 56,928,883  | <i>ARHGEF3</i>      | Gene body/1st intron       |
| cg06225294 | 3  | 114,477,961 | <i>ZBTB20</i>       | Gene body/5'UTR/1st exon   |
| cg06226283 | 7  | 103,629,555 | <i>RELN</i>         | Gene body/1st intron       |
| cg06228451 | 21 | 32,515,401  | <i>TIAMI</i>        | Gene body                  |
| cg06241101 | 17 | 77,895,684  | <i>LINC01978</i>    | Gene body/1st intron       |
| cg06243540 | 6  | 130,141,104 | <i>N/A</i>          |                            |
| cg06263495 | 11 | 2,292,004   | <i>ASCL2</i>        | Gene body/5'UTR/1st exon   |
| cg06268633 | 4  | 17,094,805  | <i>N/A</i>          |                            |
| cg06271630 | 10 | 3,329,765   | <i>N/A</i>          |                            |
| cg06279067 | 1  | 116,307,845 | <i>CASQ2</i>        | Gene body/1st intron       |
| cg06292683 | 7  | 107,999,112 | <i>NRCAM</i>        | Gene body/5'UTR            |
| cg06304401 | 3  | 173,303,193 | <i>NLGN1</i>        | Gene body/5'UTR            |
| cg06307915 | 16 | 57,004,888  | <i>CETP</i>         | Gene body                  |
| cg06309058 | 9  | 76,188,348  | <i>N/A</i>          |                            |
| cg06315390 | 22 | 45,704,914  | <i>FAM118A</i>      | Gene body/1st exon         |
| cg06333027 | 6  | 15,901,093  | <i>N/A</i>          |                            |
| cg06334095 | 14 | 90,906,698  | <i>N/A</i>          |                            |
| cg06343740 | 22 | 26,878,410  | <i>HPS4</i>         | Gene body/5'UTR/1st intron |
| cg06344992 | 15 | 90,345,999  | <i>ANPEP</i>        | Gene body                  |
| cg06361775 | 20 | 53,254,125  | <i>DOK5</i>         | Gene body                  |
| cg06368093 | 19 | 58,513,526  | <i>ZNF606</i>       | Gene body/5'UTR/1st intron |
| cg06381319 | 6  | 135,424,325 | <i>N/A</i>          |                            |
| cg06383163 | 8  | 139,509,073 | <i>FAM135B</i>      | TSS200                     |
| cg06386426 | 15 | 94,643,030  | <i>LINC01581</i>    | Gene body/1st intron       |
| cg06387851 | 6  | 136,873,376 | <i>MAP7</i>         | TSS1500                    |
| cg06412030 | 13 | 113,469,310 | <i>ATP11A</i>       | Gene body                  |
| cg06413351 | 8  | 190,459     | <i>ZNF596</i>       | Gene body/5'UTR/1st intron |
| cg06414451 | 3  | 13,817,902  | <i>N/A</i>          |                            |
| cg06419750 | 12 | 129,337,910 | <i>GLT1D1</i>       | TSS200                     |
| cg06424097 | 11 | 122,848,244 | <i>N/A</i>          |                            |
| cg06454283 | 8  | 40,552,037  | <i>ZMAT4</i>        | Gene body                  |
| cg06454388 | 1  | 151,072,426 | <i>GABPB2</i>       | Gene body                  |

|            |    |             |                   |                            |
|------------|----|-------------|-------------------|----------------------------|
| cg06454659 | 13 | 101,977,455 | <i>NALCN</i>      | Gene body                  |
| cg06460944 | 20 | 19,194,303  | <i>SLC24A3</i>    | Gene body/1st intron       |
| cg06475006 | 16 | 89,985,975  | <i>MC1R</i>       | Gene body/1st exon         |
| cg06476522 | 2  | 76,496,120  | <i>N/A</i>        |                            |
| cg06478004 | 16 | 56,550,134  | <i>BBS2</i>       | Gene body/1st intron       |
| cg06478545 | 9  | 16,526,801  | <i>BNC2</i>       | Gene body                  |
| cg06493207 | 5  | 174,160,825 | <i>N/A</i>        |                            |
| cg06516533 | 5  | 131,732,471 | <i>N/A</i>        |                            |
| cg06521347 | 8  | 128,139,451 | <i>N/A</i>        |                            |
| cg06532574 | 5  | 95,295,740  | <i>ELL2</i>       | Gene body/1st intron       |
| cg06533798 | 11 | 59,323,070  | <i>N/A</i>        |                            |
| cg06541222 | 8  | 74,019,754  | <i>N/A</i>        |                            |
| cg06544951 | 8  | 59,555,116  | <i>NSMAF</i>      | Gene body                  |
| cg06566419 | 10 | 98,707,906  | <i>LCOR</i>       | Gene body/5'UTR            |
| cg06571559 | 10 | 670,787     | <i>DIP2C</i>      | Gene body/1st intron       |
| cg06573604 | 2  | 160,760,825 | <i>LY75-CD302</i> | Gene body/1st intron       |
| cg06577769 | 4  | 17,126,704  | <i>N/A</i>        |                            |
| cg06579154 | 10 | 134,752,183 | <i>CFAP46</i>     | Gene body                  |
| cg06617636 | 14 | 69,256,690  | <i>ZFP36L1</i>    | Gene body                  |
| cg06626750 | 17 | 56,082,885  | <i>SRSF1</i>      | Gene body                  |
| cg06638568 | 6  | 163,730,822 | <i>PACRG</i>      | Gene body                  |
| cg06640991 | 11 | 104,576,519 | <i>N/A</i>        |                            |
| cg06644515 | 1  | 173,834,831 | <i>SNORD78</i>    | TSS200                     |
| cg06653203 | 3  | 13,860,477  | <i>WNT7A</i>      | Gene body                  |
| cg06654691 | 17 | 40,825,980  | <i>PLEKHH3</i>    | Gene body                  |
| cg06668555 | 8  | 139,509,129 | <i>FAM135B</i>    | TSS200                     |
| cg06696176 | 2  | 169,923,213 | <i>DHRS9</i>      | TSS1500                    |
| cg06703727 | 7  | 12,746,354  | <i>N/A</i>        |                            |
| cg06711259 | 22 | 39,095,898  | <i>JOSD1</i>      | Gene body/1st exon         |
| cg06716730 | 17 | 35,851,459  | <i>DUSP14</i>     | Gene body/5'UTR/1st intron |
| cg06720823 | 12 | 97,399,497  | <i>N/A</i>        |                            |
| cg06722639 | 14 | 23,624,377  | <i>SLC7A8</i>     | Gene body/1st exon         |
| cg06736024 | 11 | 76,650,418  | <i>ACER3</i>      | Gene body                  |
| cg06736444 | 16 | 2,801,793   | <i>SRRM2</i>      | TSS1500                    |
| cg06749053 | 11 | 121,971,219 | <i>MIR100HG</i>   | Gene body/1st exon         |
| cg06770520 | 5  | 137,721,718 | <i>KDM3B</i>      | Gene body                  |
| cg06776703 | 19 | 4,328,759   | <i>STAP2</i>      | Gene body                  |
| cg06790168 | 10 | 6,488,016   | <i>PRKCQ</i>      | Gene body                  |
| cg06796314 | 10 | 7,088,654   | <i>N/A</i>        |                            |
| cg06802565 | 1  | 68,788,961  | <i>N/A</i>        |                            |
| cg06806922 | 13 | 102,438,434 | <i>FGF14</i>      | Gene body                  |
| cg06812216 | 6  | 126,589,299 | <i>N/A</i>        |                            |
| cg06817737 | 12 | 966,396     | <i>WNK1</i>       | Gene body                  |
| cg06819296 | 8  | 10,982,668  | <i>XKR6</i>       | Gene body                  |
| cg06820621 | 5  | 92,938,232  | <i>N/A</i>        |                            |
| cg06821404 | 13 | 108,019,357 | <i>FAM155A</i>    | Gene body/1st intron       |
| cg06822192 | 8  | 145,103,309 | <i>N/A</i>        |                            |
| cg06834454 | 7  | 41,970,510  | <i>N/A</i>        |                            |
| cg06843889 | 5  | 42,949,542  | <i>N/A</i>        |                            |
| cg06849381 | 22 | 26,878,792  | <i>HPS4</i>       | Gene body/5'UTR/1st intron |
| cg06861044 | 16 | 20,359,815  | <i>UMOD</i>       | Gene body                  |
| cg06861426 | 5  | 179,244,317 | <i>SQSTM1</i>     | Gene body/5'UTR            |
| cg06862374 | 2  | 219,736,549 | <i>WNT6</i>       | Gene body                  |
| cg06878499 | 1  | 239,621,510 | <i>CHRM3</i>      | Gene body/5'UTR/1st intron |
| cg06880808 | 6  | 129,748,968 | <i>LAMA2</i>      | Gene body                  |
| cg06890161 | 17 | 77,895,596  | <i>LINC01978</i>  | Gene body/1st intron       |

|            |    |             |                   |                            |
|------------|----|-------------|-------------------|----------------------------|
| cg06890813 | 8  | 124,214,953 | <i>FAM83A-AS1</i> | Gene body/1st exon         |
| cg06905679 | 1  | 54,008,126  | <i>GLIS1</i>      | Gene body                  |
| cg06918474 | 5  | 126,205,081 | <i>3-Mar</i>      | Gene body/3'UTR            |
| cg06958829 | 17 | 48,546,118  | <i>CHAD</i>       | Gene body/1st exon         |
| cg06959284 | 2  | 12,642,144  | <i>MIR3681HG</i>  | Gene body                  |
| cg06968859 | 2  | 80,724,209  | <i>CTNNA2</i>     | Gene body                  |
| cg06981880 | 6  | 168,333,191 | <i>AFDN</i>       | Gene body                  |
| cg07007490 | 2  | 12,212,530  | <i>MIR3681HG</i>  | Gene body                  |
| cg07010711 | 9  | 93,644,195  | <i>SYK</i>        | Gene body                  |
| cg07013787 | 2  | 171,572,499 | <i>SP5</i>        | Gene body/1st intron       |
| cg07014523 | 20 | 50,721,313  | <i>ZFP64</i>      | Gene body/1st intron       |
| cg07040396 | 18 | 74,091,753  | <i>ZNF516</i>     | Gene body                  |
| cg07041327 | 18 | 56,008,827  | <i>NEDD4L</i>     | Gene body                  |
| cg07052063 | 10 | 99,255,236  | <i>MMS19</i>      | Gene body/5'UTR/1st intron |
| cg07055112 | 4  | 84,519,293  | <i>GPAT3</i>      | Gene body                  |
| cg07059402 | 22 | 38,244,781  | <i>ANKRD54</i>    | Gene body/5'UTR/1st exon   |
| cg07075337 | 10 | 125,673,300 | <i>N/A</i>        |                            |
| cg07079219 | 11 | 59,323,318  | <i>N/A</i>        |                            |
| cg07084675 | 18 | 56,666,239  | <i>N/A</i>        |                            |
| cg07084721 | 7  | 100,200,749 | <i>PCOLCE</i>     | Gene body/1st intron       |
| cg07091078 | 5  | 33,942,656  | <i>N/A</i>        |                            |
| cg07091719 | 1  | 119,472,387 | <i>TBX15</i>      | Gene body                  |
| cg07100242 | 20 | 46,062,888  | <i>N/A</i>        |                            |
| cg07101116 | 9  | 75,486,850  | <i>LINC01474</i>  | Gene body                  |
| cg07103517 | 7  | 50,348,485  | <i>IKZF1</i>      | Gene body/5'UTR/1st exon   |
| cg07133197 | 22 | 26,176,741  | <i>MYO18B</i>     | Gene body                  |
| cg07135512 | 3  | 189,719,406 | <i>P3H2</i>       | Gene body/1st intron       |
| cg07136133 | 11 | 36,422,377  | <i>PRR5L</i>      | TSS200                     |
| cg07143623 | 5  | 135,313,253 | <i>N/A</i>        |                            |
| cg07162768 | 6  | 157,756,588 | <i>N/A</i>        |                            |
| cg07168556 | 17 | 48,912,483  | <i>WFIKKN2</i>    | TSS200                     |
| cg07175433 | 4  | 21,947,400  | <i>KCNIP4</i>     | Gene body/5'UTR/1st intron |
| cg07178969 | 11 | 59,323,439  | <i>N/A</i>        |                            |
| cg07179457 | 14 | 74,034,619  | <i>ACOT2</i>      | Gene body/1st exon         |
| cg07183148 | 10 | 71,712,878  | <i>COL13A1</i>    | Gene body                  |
| cg07192718 | 1  | 55,445,837  | <i>TMEM61</i>     | TSS1500                    |
| cg07196593 | 20 | 43,439,706  | <i>RIMS4</i>      | TSS1500                    |
| cg07203423 | 2  | 74,743,009  | <i>TLX2</i>       | Gene body                  |
| cg07208599 | 20 | 38,452,206  | <i>N/A</i>        |                            |
| cg07219453 | 15 | 94,643,025  | <i>LINC01581</i>  | Gene body/1st intron       |
| cg07221530 | 2  | 68,589,380  | <i>N/A</i>        |                            |
| cg07228978 | 22 | 29,108,388  | <i>CHEK2</i>      | Gene body                  |
| cg07229366 | 13 | 101,950,999 | <i>NALCN</i>      | Gene body                  |
| cg07233212 | 12 | 103,601,576 | <i>N/A</i>        |                            |
| cg07254055 | 6  | 35,011,768  | <i>ANKS1A</i>     | Gene body                  |
| cg07262247 | 5  | 131,593,730 | <i>PDLIM4</i>     | Gene body/1st intron       |
| cg07265728 | 12 | 116,361,044 | <i>N/A</i>        |                            |
| cg07269756 | 7  | 35,720,469  | <i>HERPUD2</i>    | Gene body                  |
| cg07270153 | 7  | 19,185,260  | <i>FERD3L</i>     | TSS1500                    |
| cg07276183 | 2  | 114,512,666 | <i>SLC35F5</i>    | Gene body                  |
| cg07281370 | 11 | 121,970,768 | <i>MIR125B1</i>   | TSS1500                    |
| cg07338476 | 2  | 1,625,016   | <i>N/A</i>        |                            |
| cg07343027 | 17 | 80,024,200  | <i>DUSIL</i>      | TSS1500                    |
| cg07354583 | 12 | 9,911,289   | <i>CD69</i>       | Gene body/1st intron       |
| cg07361663 | 1  | 92,377,904  | <i>N/A</i>        |                            |
| cg07378840 | 1  | 232,630,571 | <i>SIPAIL2</i>    | Gene body/1st intron       |

|            |    |             |                     |                            |
|------------|----|-------------|---------------------|----------------------------|
| cg07381284 | 7  | 39,537,427  | <i>N/A</i>          |                            |
| cg07416664 | 22 | 38,221,485  | <i>GALR3</i>        | Gene body/3'UTR            |
| cg07417683 | 1  | 159,440,267 | <i>N/A</i>          |                            |
| cg07432484 | 2  | 1,623,949   | <i>N/A</i>          |                            |
| cg07436694 | 16 | 21,638,444  | <i>METTL9</i>       | Gene body                  |
| cg07483589 | 3  | 86,529,814  | <i>LINC02070</i>    | TSS1500                    |
| cg07494300 | 13 | 102,051,019 | <i>NALCN</i>        | Gene body                  |
| cg07495916 | 12 | 10,707,518  | <i>LINC02446</i>    | Gene body/1st intron       |
| cg07499182 | 13 | 33,825,496  | <i>STARD13</i>      | Gene body/1st intron       |
| cg07499835 | 3  | 157,885,964 | <i>RSRC1</i>        | Gene body                  |
| cg07505589 | 1  | 216,895,737 | <i>ESRRG</i>        | Gene body/1st intron       |
| cg07509511 | 2  | 65,297,852  | <i>CEP68</i>        | Gene body                  |
| cg07513768 | 15 | 69,744,528  | <i>RPLP1</i>        | TSS1500                    |
| cg07529625 | 8  | 130,538,420 | <i>CCDC26</i>       | Gene body/1st intron       |
| cg07537095 | 11 | 116,228,957 | <i>N/A</i>          |                            |
| cg07538190 | 8  | 22,458,182  | <i>C8orf58</i>      | Gene body/1st intron       |
| cg07555397 | 7  | 127,314,628 | <i>SND1</i>         | Gene body/1st intron       |
| cg07559745 | 3  | 64,251,919  | <i>N/A</i>          |                            |
| cg07582043 | 10 | 130,427,658 | <i>N/A</i>          |                            |
| cg07586149 | 6  | 170,675,788 | <i>FAM120B</i>      | Gene body                  |
| cg07597078 | 2  | 12,478,381  | <i>MIR3681HG</i>    | Gene body                  |
| cg07616836 | 6  | 122,682,629 | <i>N/A</i>          |                            |
| cg07629965 | 3  | 50,312,389  | <i>SEMA3B</i>       | Gene body                  |
| cg07636520 | 7  | 41,826,244  | <i>N/A</i>          |                            |
| cg07637534 | 2  | 38,460,787  | <i>N/A</i>          |                            |
| cg07647077 | 1  | 165,257,956 | <i>LMX1A</i>        | Gene body                  |
| cg07661904 | 10 | 71,930,999  | <i>SARIA</i>        | TSS1500                    |
| cg07684519 | 12 | 29,303,184  | <i>FAR2</i>         | Gene body/5'UTR/1st intron |
| cg07684796 | 10 | 54,074,209  | <i>DKK1</i>         | Gene body/1st exon         |
| cg07717625 | 20 | 49,609,852  | <i>N/A</i>          |                            |
| cg07744114 | 7  | 641,413     | <i>LOC101926963</i> | TSS1500                    |
| cg07751669 | 9  | 114,546,247 | <i>C9orf84</i>      | TSS1500                    |
| cg07754887 | 7  | 95,622,982  | <i>DYNC111</i>      | Gene body                  |
| cg07757506 | 8  | 19,217,531  | <i>SH2D4A</i>       | Gene body                  |
| cg07769074 | 7  | 150,497,760 | <i>TMEM176A</i>     | TSS200                     |
| cg07784872 | 16 | 85,687,041  | <i>GSE1</i>         | Gene body                  |
| cg07791897 | 5  | 55,897,584  | <i>C5orf67</i>      | Gene body/5'UTR/1st intron |
| cg07792332 | 2  | 204,954,437 | <i>N/A</i>          |                            |
| cg07794150 | 1  | 34,402,783  | <i>CSMD2</i>        | Gene body                  |
| cg07796826 | 1  | 246,168,639 | <i>SMYD3</i>        | Gene body                  |
| cg07805542 | 1  | 9,779,309   | <i>PIK3CD</i>       | Gene body                  |
| cg07813142 | 2  | 171,573,223 | <i>SP5</i>          | Gene body                  |
| cg07818401 | 3  | 58,614,496  | <i>FAM107A</i>      | TSS1500                    |
| cg07824920 | 18 | 77,959,594  | <i>PARD6G</i>       | Gene body                  |
| cg07838495 | 17 | 8,287,763   | <i>RPL26</i>        | TSS1500                    |
| cg07840179 | 5  | 133,461,033 | <i>TCF7</i>         | Gene body                  |
| cg07858613 | 7  | 38,389,685  | <i>TRG-ASI</i>      | Gene body                  |
| cg07859439 | 2  | 197,792,757 | <i>PGAP1</i>        | TSS1500                    |
| cg07869048 | 10 | 44,186,131  | <i>N/A</i>          |                            |
| cg07876051 | 10 | 3,159,145   | <i>PFKP</i>         | Gene body                  |
| cg07889355 | 16 | 54,073,612  | <i>FTO-IT1</i>      | Gene body                  |
| cg07895681 | 1  | 162,958,983 | <i>N/A</i>          |                            |
| cg07898087 | 4  | 17,060,364  | <i>N/A</i>          |                            |
| cg07914107 | 1  | 66,256,911  | <i>PDE4B</i>        | TSS1500                    |
| cg07937170 | 1  | 219,498,589 | <i>N/A</i>          |                            |
| cg07965640 | 2  | 214,149,735 | <i>SPAG16</i>       | Gene body/1st intron       |



|            |    |             |                  |                            |
|------------|----|-------------|------------------|----------------------------|
| cg07974511 | 2  | 63,283,013  | <i>OTX1</i>      | Gene body                  |
| cg07977937 | 1  | 183,002,454 | <i>LAMC1</i>     | Gene body/1st intron       |
| cg07979591 | 3  | 57,008,965  | <i>ARHGEF3</i>   | Gene body                  |
| cg07986257 | 6  | 22,321,172  | <i>N/A</i>       |                            |
| cg07987728 | 10 | 105,499,409 | <i>SH3PXD2A</i>  | Gene body                  |
| cg07992500 | 2  | 37,896,583  | <i>CDC42EP3</i>  | Gene body/5'UTR/1st intron |
| cg08000731 | 11 | 316,247     | <i>N/A</i>       |                            |
| cg08005093 | 17 | 63,532,898  | <i>AXIN2</i>     | Gene body                  |
| cg08044253 | 7  | 79,840,384  | <i>GNAI1</i>     | Gene body                  |
| cg08053675 | 6  | 148,588,950 | <i>N/A</i>       |                            |
| cg08055781 | 3  | 32,268,674  | <i>N/A</i>       |                            |
| cg08066631 | 11 | 2,850,353   | <i>KCNQ1</i>     | Gene body                  |
| cg08091666 | 17 | 79,961,769  | <i>ASPSCR1</i>   | Gene body                  |
| cg08124446 | 11 | 43,596,529  | <i>N/A</i>       |                            |
| cg08128148 | 15 | 57,256,372  | <i>TCF12</i>     | Gene body                  |
| cg08131059 | 2  | 469,790     | <i>N/A</i>       |                            |
| cg08132858 | 7  | 101,361,395 | <i>N/A</i>       |                            |
| cg08138256 | 13 | 101,842,722 | <i>NALCN</i>     | Gene body                  |
| cg08145700 | 10 | 63,157,634  | <i>N/A</i>       |                            |
| cg08154107 | 3  | 183,994,073 | <i>ECE2</i>      | Gene body/1st intron       |
| cg08193130 | 12 | 106,114,929 | <i>CASC18</i>    | Gene body/1st intron       |
| cg08194989 | 8  | 41,655,154  | <i>ANK1</i>      | TSS200                     |
| cg08195983 | 3  | 61,235,829  | <i>FHIT</i>      | Gene body/5'UTR/1st intron |
| cg08217163 | 2  | 66,809,959  | <i>LINC01798</i> | Gene body/1st intron       |
| cg08224785 | 5  | 156,696,189 | <i>CYFIP2</i>    | TSS200                     |
| cg08230268 | 16 | 7,489,771   | <i>RBFOX1</i>    | Gene body/1st intron       |
| cg08245083 | 6  | 6,151,626   | <i>F13A1</i>     | Gene body                  |
| cg08248188 | 6  | 16,167,740  | <i>N/A</i>       |                            |
| cg08252579 | 3  | 62,359,773  | <i>FEZF2</i>     | TSS1500                    |
| cg08256145 | 1  | 159,258,330 | <i>FCERIA</i>    | TSS1500                    |
| cg08270005 | 8  | 96,179,452  | <i>N/A</i>       |                            |
| cg08272835 | 4  | 56,458,622  | <i>PDCL2</i>     | TSS1500                    |
| cg08274405 | 5  | 66,254,395  | <i>MAST4</i>     | TSS1500                    |
| cg08278238 | 8  | 141,436,070 | <i>TRAPPC9</i>   | Gene body                  |
| cg08279008 | 2  | 86,263,224  | <i>POLR1A</i>    | Gene body                  |
| cg08279598 | 10 | 28,897,020  | <i>WAC</i>       | Gene body                  |
| cg08280368 | 14 | 71,110,536  | <i>TTC9</i>      | Gene body/1st intron       |
| cg08293102 | 14 | 51,387,478  | <i>PYGL</i>      | Gene body                  |
| cg08310756 | 16 | 79,019,230  | <i>WWOX</i>      | Gene body                  |
| cg08311321 | 17 | 79,952,915  | <i>ASPSCR1</i>   | Gene body                  |
| cg08319103 | 17 | 77,086,388  | <i>RBFOX3</i>    | Gene body/3'UTR            |
| cg08319291 | 7  | 140,251,789 | <i>DENND2A</i>   | Gene body                  |
| cg08324862 | 12 | 77,800,655  | <i>N/A</i>       |                            |
| cg08326132 | 11 | 116,065,064 | <i>N/A</i>       |                            |
| cg08328750 | 17 | 39,675,355  | <i>KRT15</i>     | TSS200                     |
| cg08342412 | 12 | 99,531,134  | <i>ANKS1B</i>    | Gene body/1st intron       |
| cg08344422 | 10 | 128,946,892 | <i>FAM196A</i>   | Gene body                  |
| cg08359956 | 7  | 150,498,205 | <i>TMEM176B</i>  | Gene body/5'UTR/1st exon   |
| cg08364820 | 13 | 21,995,394  | <i>ZDHHC20</i>   | Gene body                  |
| cg08365738 | 3  | 112,324,301 | <i>CCDC80</i>    | Gene body                  |
| cg08396974 | 20 | 55,840,416  | <i>BMP7</i>      | Gene body/1st intron       |
| cg08407204 | 17 | 77,723,479  | <i>N/A</i>       |                            |
| cg08417857 | 13 | 102,057,990 | <i>NALCN</i>     | Gene body/5'UTR/1st intron |
| cg08423443 | 20 | 56,621,504  | <i>N/A</i>       |                            |
| cg08426898 | 2  | 174,916,731 | <i>N/A</i>       |                            |
| cg08440077 | 2  | 241,854,588 | <i>CROCC2</i>    | Gene body/1st intron       |

|            |    |             |                     |                            |
|------------|----|-------------|---------------------|----------------------------|
| cg08450163 | 17 | 39,066,947  | <i>N/A</i>          |                            |
| cg08455936 | 16 | 27,781,069  | <i>KIAA0556</i>     | Gene body                  |
| cg08458733 | 8  | 37,555,577  | <i>ZNF703</i>       | Gene body                  |
| cg08459553 | 22 | 44,965,189  | <i>LINC00207</i>    | TSS200                     |
| cg08460078 | 6  | 29,829,406  | <i>N/A</i>          |                            |
| cg08473330 | 2  | 63,282,883  | <i>OTX1</i>         | Gene body                  |
| cg08475411 | 17 | 14,845,851  | <i>N/A</i>          |                            |
| cg08481464 | 10 | 77,871,618  | <i>LRMDA</i>        | Gene body                  |
| cg08494572 | 10 | 125,685,621 | <i>N/A</i>          |                            |
| cg08502652 | 6  | 168,592,971 | <i>N/A</i>          |                            |
| cg08510178 | 6  | 165,062,070 | <i>N/A</i>          |                            |
| cg08523181 | 20 | 46,438,681  | <i>N/A</i>          |                            |
| cg08533745 | 12 | 28,124,011  | <i>PTHLH</i>        | Gene body/5'UTR/1st intron |
| cg08534653 | 2  | 1,747,700   | <i>PXDN</i>         | Gene body/1st intron       |
| cg08536841 | 19 | 49,250,452  | <i>IZUMO1</i>       | TSS1500                    |
| cg08543623 | 18 | 3,247,013   | <i>MYL12A</i>       | TSS1500                    |
| cg08549011 | 5  | 132,583,129 | <i>FSTL4</i>        | Gene body                  |
| cg08549390 | 7  | 25,702,709  | <i>N/A</i>          |                            |
| cg08553601 | 4  | 53,729,461  | <i>RASL11B</i>      | Gene body                  |
| cg08563544 | 2  | 212,795,331 | <i>ERBB4</i>        | Gene body                  |
| cg08565197 | 2  | 240,196,284 | <i>HDAC4</i>        | Gene body                  |
| cg08565836 | 10 | 92,753,740  | <i>N/A</i>          |                            |
| cg08592912 | 20 | 56,403,926  | <i>N/A</i>          |                            |
| cg08596308 | 6  | 31,516,045  | <i>NFKBIL1</i>      | Gene body                  |
| cg08609163 | 10 | 104,478,138 | <i>SFXN2</i>        | Gene body/5'UTR/1st intron |
| cg08612271 | 6  | 143,575,123 | <i>AIG1</i>         | Gene body                  |
| cg08615596 | 12 | 68,758,840  | <i>N/A</i>          |                            |
| cg08623277 | 2  | 206,004,876 | <i>PARD3B</i>       | Gene body                  |
| cg08629043 | 2  | 240,196,078 | <i>HDAC4</i>        | Gene body                  |
| cg08634082 | 1  | 241,801,700 | <i>OPN3</i>         | Gene body/1st intron       |
| cg08639762 | 1  | 201,437,298 | <i>PHLDA3</i>       | Gene body/1st intron       |
| cg08640361 | 6  | 134,494,620 | <i>SGK1</i>         | Gene body                  |
| cg08645153 | 16 | 72,942,661  | <i>ZFHX3</i>        | Gene body                  |
| cg08686889 | 5  | 102,229,649 | <i>PAM</i>          | Gene body                  |
| cg08755784 | 16 | 27,829,728  | <i>GSGIL</i>        | Gene body                  |
| cg08760067 | 10 | 49,651,666  | <i>N/A</i>          |                            |
| cg08771569 | 2  | 214,090,794 | <i>N/A</i>          |                            |
| cg08781639 | 8  | 121,787,613 | <i>LOC101927543</i> | Gene body                  |
| cg08784462 | 3  | 142,683,069 | <i>PAQR9-AS1</i>    | Gene body/1st intron       |
| cg08812555 | 10 | 54,074,788  | <i>DKK1</i>         | Gene body                  |
| cg08814405 | 7  | 19,183,753  | <i>N/A</i>          |                            |
| cg08815293 | 7  | 19,159,569  | <i>N/A</i>          |                            |
| cg08815398 | 12 | 65,218,869  | <i>TBC1D30</i>      | Gene body/1st intron       |
| cg08831077 | 3  | 11,178,745  | <i>HRH1</i>         | TSS200                     |
| cg08865695 | 1  | 209,917,237 | <i>LOC101930114</i> | TSS1500                    |
| cg08871701 | 7  | 38,453,574  | <i>AMPH</i>         | Gene body                  |
| cg08882046 | 10 | 79,770,412  | <i>POLR3A</i>       | Gene body                  |
| cg08883853 | 7  | 1,026,168   | <i>CYP2W1</i>       | Gene body                  |
| cg08891123 | 15 | 59,576,097  | <i>MYO1E</i>        | Gene body/1st intron       |
| cg08894319 | 10 | 112,527,640 | <i>RBM20</i>        | Gene body/1st intron       |
| cg08894744 | 10 | 1,219,231   | <i>N/A</i>          |                            |
| cg08898775 | 15 | 59,042,684  | <i>ADAM10</i>       | TSS1500                    |
| cg08911728 | 5  | 109,189,484 | <i>MAN2A1</i>       | Gene body                  |
| cg08912287 | 5  | 138,311,028 | <i>SIL1</i>         | Gene body                  |
| cg08922584 | 13 | 101,277,847 | <i>TMTC4</i>        | Gene body                  |
| cg08922603 | 4  | 4,763,690   | <i>LOC101928279</i> | Gene body/1st exon         |

|            |    |             |                  |                            |
|------------|----|-------------|------------------|----------------------------|
| cg08936706 | 3  | 46,906,385  | <i>MYL3</i>      | TSS1500                    |
| cg08937890 | 7  | 55,147,427  | <i>EGFR</i>      | Gene body/1st intron       |
| cg08944236 | 16 | 53,242,355  | <i>CHD9</i>      | TSS200                     |
| cg08949512 | 12 | 96,941,563  | <i>CFAP54</i>    | Gene body                  |
| cg08958802 | 9  | 111,175,602 | <i>N/A</i>       |                            |
| cg08968507 | 6  | 31,495,090  | <i>N/A</i>       |                            |
| cg08973580 | 22 | 46,918,924  | <i>CELSR1</i>    | Gene body/1st intron       |
| cg08982940 | 17 | 19,575,583  | <i>ALDH3A2</i>   | Gene body                  |
| cg09014801 | 3  | 8,704,494   | <i>N/A</i>       |                            |
| cg09027313 | 6  | 144,733,031 | <i>UTRN</i>      | Gene body                  |
| cg09045979 | 10 | 5,918,682   | <i>ANKRD16</i>   | Gene body/3'UTR            |
| cg09053247 | 3  | 44,802,549  | <i>KIAA1143</i>  | Gene body/1st intron       |
| cg09061733 | 11 | 57,364,841  | <i>SERPING1</i>  | TSS200                     |
| cg09085842 | 6  | 31,782,961  | <i>HSPAIL</i>    | TSS200                     |
| cg09090376 | 11 | 33,040,743  | <i>DEPDC7</i>    | Gene body/1st intron       |
| cg09090652 | 12 | 25,205,846  | <i>LRMP</i>      | Gene body/5'UTR/1st exon   |
| cg09105193 | 12 | 69,327,238  | <i>CPM</i>       | TSS1500                    |
| cg09107253 | 9  | 685,970     | <i>KANK1</i>     | TSS1500                    |
| cg09108491 | 5  | 135,265,999 | <i>FBXL21</i>    | TSS200                     |
| cg09115473 | 5  | 14,440,991  | <i>TRIO</i>      | Gene body                  |
| cg09118932 | 2  | 1,748,337   | <i>PXDN</i>      | TSS200                     |
| cg09119854 | 17 | 63,550,766  | <i>AXIN2</i>     | Gene body                  |
| cg09125316 | 7  | 1,015,418   | <i>COX19</i>     | TSS200                     |
| cg09144098 | 16 | 56,518,581  | <i>BBS2</i>      | Gene body/3'UTR            |
| cg09162127 | 20 | 48,100,238  | <i>KCNB1</i>     | TSS1500                    |
| cg09180564 | 1  | 102,308,808 | <i>OLFM3</i>     | Gene body/1st intron       |
| cg09184899 | 8  | 42,234,243  | <i>DKK4</i>      | Gene body/1st intron       |
| cg09198462 | 6  | 152,916,616 | <i>SYNE1</i>     | Gene body                  |
| cg09216030 | 21 | 34,127,686  | <i>PAXBP1</i>    | Gene body                  |
| cg09216650 | 12 | 115,174,051 | <i>N/A</i>       |                            |
| cg09226237 | 15 | 94,615,471  | <i>LINC01581</i> | Gene body                  |
| cg09232478 | 1  | 119,548,852 | <i>N/A</i>       |                            |
| cg09244277 | 2  | 12,538,247  | <i>MIR3681HG</i> | Gene body                  |
| cg09247319 | 21 | 45,683,302  | <i>DNMT3L</i>    | TSS1500                    |
| cg09250149 | 16 | 85,684,353  | <i>GSE1</i>      | Gene body                  |
| cg09257301 | 7  | 18,573,726  | <i>HDAC9</i>     | Gene body/5'UTR/1st intron |
| cg09272992 | 7  | 150,497,601 | <i>TMEM176B</i>  | Gene body/5'UTR/1st exon   |
| cg09278089 | 15 | 26,092,373  | <i>ATP10A</i>    | Gene body/1st intron       |
| cg09284949 | 19 | 51,190,179  | <i>SHANK1</i>    | Gene body                  |
| cg09323041 | 5  | 179,046,121 | <i>HNRNPH1</i>   | Gene body                  |
| cg09327378 | 22 | 32,437,574  | <i>SLC5A1</i>    | TSS1500                    |
| cg09363891 | 12 | 18,572,585  | <i>PIK3C2G</i>   | Gene body                  |
| cg09370594 | 19 | 2,291,872   | <i>LINGO3</i>    | Gene body/5'UTR/1st intron |
| cg09373034 | 12 | 65,218,250  | <i>TBC1D30</i>   | TSS200                     |
| cg09386458 | 2  | 37,571,178  | <i>QPCT</i>      | TSS1500                    |
| cg09397175 | 2  | 56,181,763  | <i>N/A</i>       |                            |
| cg09445939 | 10 | 54,074,079  | <i>DKK1</i>      | Gene body/5'UTR/1st exon   |
| cg09461792 | 7  | 17,055,230  | <i>N/A</i>       |                            |
| cg09465786 | 10 | 54,074,743  | <i>DKK1</i>      | Gene body                  |
| cg09484243 | 5  | 134,463,743 | <i>C5orf66</i>   | Gene body/5'UTR            |
| cg09486902 | 12 | 65,219,478  | <i>TBC1D30</i>   | Gene body/1st intron       |
| cg09494161 | 1  | 10,168,439  | <i>UBE4B</i>     | Gene body                  |
| cg09494546 | 1  | 110,933,248 | <i>SLC16A4</i>   | Gene body/5'UTR/1st intron |
| cg09501590 | 18 | 52,389,133  | <i>N/A</i>       |                            |
| cg09526429 | 4  | 70,105,837  | <i>N/A</i>       |                            |
| cg09546902 | 6  | 108,977,419 | <i>FOXO3</i>     | Gene body/1st intron       |

|            |    |             |                     |                            |
|------------|----|-------------|---------------------|----------------------------|
| cg09548821 | 1  | 62,380,566  | <i>PATJ</i>         | Gene body                  |
| cg09549329 | 1  | 169,854,522 | <i>SCYL3</i>        | Gene body                  |
| cg09592004 | 14 | 101,395,872 | <i>MEG8</i>         | Gene body                  |
| cg09596958 | 12 | 58,132,105  | <i>AGAP2</i>        | TSS200                     |
| cg09599228 | 4  | 159,444,830 | <i>RXFP1</i>        | Gene body/5'UTR/1st intron |
| cg09615224 | 3  | 3,842,202   | <i>LOC100130207</i> | Gene body/1st intron       |
| cg09618102 | 2  | 1,747,364   | <i>PXDN</i>         | Gene body/1st intron       |
| cg09628359 | 8  | 20,039,283  | <i>SLC18A1</i>      | Gene body/5'UTR            |
| cg09632887 | 20 | 15,897,475  | <i>LOC613266</i>    | Gene body/1st intron       |
| cg09636245 | 11 | 7,699,330   | <i>N/A</i>          |                            |
| cg09681537 | 9  | 97,794,194  | <i>C9orf3</i>       | Gene body                  |
| cg09688156 | 4  | 84,473,816  | <i>GPAT3</i>        | Gene body                  |
| cg09695243 | 2  | 205,302,995 | <i>N/A</i>          |                            |
| cg09697033 | 8  | 10,929,599  | <i>XKR6</i>         | Gene body/1st intron       |
| cg09699925 | 2  | 28,499,003  | <i>BABAM2</i>       | Gene body                  |
| cg09701000 | 2  | 233,215,546 | <i>N/A</i>          |                            |
| cg09702771 | 10 | 1,317,627   | <i>ADARB2</i>       | Gene body                  |
| cg09707903 | 12 | 19,286,583  | <i>PLEKHA5</i>      | Gene body                  |
| cg09746554 | 22 | 29,313,113  | <i>ZNRF3</i>        | TSS1500                    |
| cg09747182 | 16 | 17,543,363  | <i>XYLT1</i>        | Gene body/1st intron       |
| cg09771226 | 17 | 45,786,313  | <i>TBKBP1</i>       | Gene body                  |
| cg09771827 | 3  | 186,301,887 | <i>DNAJB11</i>      | Gene body                  |
| cg09774699 | 5  | 171,007,694 | <i>N/A</i>          |                            |
| cg09776463 | 17 | 40,836,087  | <i>CNTNAP1</i>      | Gene body                  |
| cg09807817 | 14 | 50,490,901  | <i>LINC01599</i>    | Gene body                  |
| cg09813845 | 4  | 87,884,634  | <i>AFF1</i>         | Gene body                  |
| cg09817024 | 8  | 11,471,395  | <i>N/A</i>          |                            |
| cg09837559 | 3  | 132,182,603 | <i>DNAJC13</i>      | Gene body                  |
| cg09840141 | 4  | 16,918,719  | <i>N/A</i>          |                            |
| cg09849314 | 3  | 195,283,427 | <i>N/A</i>          |                            |
| cg09853390 | 8  | 97,321,794  | <i>PTDSS1</i>       | Gene body                  |
| cg09865235 | 19 | 51,471,555  | <i>KLK6</i>         | Gene body/5'UTR/1st intron |
| cg09875257 | 1  | 19,753,627  | <i>CAPZB</i>        | Gene body/1st intron       |
| cg09880955 | 14 | 29,240,904  | <i>LINC01551</i>    | TSS1500                    |
| cg09889673 | 12 | 116,504,835 | <i>MED13L</i>       | Gene body                  |
| cg09893350 | 10 | 31,805,747  | <i>ZEB1</i>         | Gene body                  |
| cg09907183 | 5  | 7,273,025   | <i>N/A</i>          |                            |
| cg09908426 | 11 | 82,109,410  | <i>MIR4300HG</i>    | Gene body/1st intron       |
| cg09917274 | 2  | 152,144,828 | <i>NMI</i>          | Gene body/5'UTR/1st intron |
| cg09925620 | 17 | 79,957,568  | <i>ASPSCR1</i>      | Gene body                  |
| cg09938677 | 1  | 218,636,703 | <i>MIR548F3</i>     | Gene body                  |
| cg09953601 | 7  | 117,467,966 | <i>CTTNBP2</i>      | Gene body                  |
| cg09967523 | 18 | 18,943,072  | <i>GREB1L</i>       | Gene body/5'UTR/1st intron |
| cg09967604 | 9  | 16,640,941  | <i>BNC2</i>         | Gene body                  |
| cg09967994 | 21 | 15,824,713  | <i>N/A</i>          |                            |
| cg09975867 | 1  | 18,958,324  | <i>PAX7</i>         | Gene body/1st intron       |
| cg09991306 | 2  | 241,975,140 | <i>SNED1</i>        | Gene body                  |
| cg10002860 | 11 | 1,482,176   | <i>BRSK2</i>        | Gene body/3'UTR            |
| cg10022526 | 11 | 27,744,557  | <i>BDNF</i>         | TSS1500                    |
| cg10035611 | 2  | 200,760,391 | <i>N/A</i>          |                            |
| cg10071305 | 3  | 50,127,998  | <i>RBM5</i>         | Gene body                  |
| cg10075976 | 12 | 99,303,715  | <i>ANKS1B</i>       | Gene body                  |
| cg10077239 | 14 | 30,397,686  | <i>PRKD1</i>        | TSS1500                    |
| cg10101375 | 2  | 25,574,101  | <i>N/A</i>          |                            |
| cg10104252 | 12 | 3,563,899   | <i>PRMT8</i>        | Gene body/1st intron       |
| cg10111899 | 4  | 121,840,907 | <i>PRDM5</i>        | Gene body/1st intron       |

|            |    |             |                     |                            |
|------------|----|-------------|---------------------|----------------------------|
| cg10115986 | 6  | 20,826,763  | <i>CDKAL1</i>       | Gene body                  |
| cg10117831 | 14 | 89,881,817  | <i>FOXP3</i>        | Gene body/5'UTR/1st intron |
| cg10120816 | 6  | 99,296,305  | <i>N/A</i>          |                            |
| cg10123201 | 3  | 46,906,323  | <i>MYL3</i>         | TSS1500                    |
| cg10125465 | 1  | 10,169,029  | <i>UBE4B</i>        | Gene body                  |
| cg10135293 | 20 | 55,861,770  | <i>N/A</i>          |                            |
| cg10182878 | 11 | 103,519,385 | <i>N/A</i>          |                            |
| cg10187902 | 14 | 106,450,500 | <i>N/A</i>          |                            |
| cg10195169 | 12 | 130,590,294 | <i>N/A</i>          |                            |
| cg10220645 | 6  | 129,753,699 | <i>LAMA2</i>        | Gene body                  |
| cg10229594 | 7  | 5,277,188   | <i>N/A</i>          |                            |
| cg10237817 | 1  | 154,519,846 | <i>TDRD10</i>       | Gene body                  |
| cg10237903 | 8  | 139,509,075 | <i>FAM135B</i>      | TSS200                     |
| cg10241823 | 17 | 841,205     | <i>NXN</i>          | Gene body/1st intron       |
| cg10264354 | 6  | 129,505,619 | <i>LAMA2</i>        | Gene body                  |
| cg10266332 | 2  | 171,572,525 | <i>SP5</i>          | Gene body/1st intron       |
| cg10271061 | 6  | 31,516,015  | <i>NFKBIL1</i>      | Gene body                  |
| cg10274022 | 19 | 40,871,697  | <i>PLD3</i>         | Gene body/5'UTR            |
| cg10286897 | 22 | 48,819,538  | <i>N/A</i>          |                            |
| cg10290276 | 11 | 2,291,754   | <i>ASCL2</i>        | Gene body/5'UTR/1st exon   |
| cg10304941 | 1  | 233,249,154 | <i>PCNX2</i>        | Gene body                  |
| cg10307662 | 4  | 4,679,628   | <i>STX18-AS1</i>    | Gene body                  |
| cg10317450 | 21 | 39,723,376  | <i>N/A</i>          |                            |
| cg10328940 | 1  | 90,138,929  | <i>LRRC8C</i>       | Gene body/5'UTR/1st intron |
| cg10331073 | 10 | 26,856,128  | <i>APBB1IP</i>      | Gene body                  |
| cg10342275 | 8  | 129,406,697 | <i>N/A</i>          |                            |
| cg10364013 | 14 | 96,719,670  | <i>N/A</i>          |                            |
| cg10364115 | 7  | 2,560,976   | <i>LFNG</i>         | Gene body/1st intron       |
| cg10367909 | 6  | 31,367,038  | <i>MICA</i>         | TSS1500                    |
| cg10371155 | 17 | 37,561,101  | <i>MED1</i>         | Gene body/3'UTR            |
| cg10395772 | 13 | 103,053,652 | <i>FGF14</i>        | Gene body/1st intron       |
| cg10420310 | 16 | 14,397,576  | <i>MIR193B</i>      | TSS1500                    |
| cg10421979 | 17 | 48,546,321  | <i>CHAD</i>         | TSS200                     |
| cg10423052 | 8  | 22,562,469  | <i>N/A</i>          |                            |
| cg10437217 | 6  | 33,215,814  | <i>HCG25</i>        | TSS1500                    |
| cg10449711 | 16 | 65,668,310  | <i>N/A</i>          |                            |
| cg10459964 | 13 | 21,399,676  | <i>XPO4</i>         | Gene body                  |
| cg10495931 | 16 | 72,232,102  | <i>N/A</i>          |                            |
| cg10517293 | 11 | 86,195,538  | <i>ME3</i>          | Gene body                  |
| cg10526897 | 5  | 140,184,441 | <i>PCDHA3</i>       | Gene body/1st intron       |
| cg10528705 | 18 | 56,822,465  | <i>SEC11C</i>       | Gene body                  |
| cg10552446 | 2  | 66,809,923  | <i>LINC01798</i>    | Gene body/1st intron       |
| cg10557658 | 21 | 42,608,791  | <i>BACE2</i>        | Gene body                  |
| cg10558740 | 6  | 22,148,738  | <i>NBAT1</i>        | TSS1500                    |
| cg10575367 | 16 | 2,801,914   | <i>SRRM2</i>        | TSS1500                    |
| cg10576245 | 1  | 233,249,267 | <i>PCNX2</i>        | Gene body                  |
| cg10583414 | 12 | 48,207,063  | <i>HDAC7</i>        | Gene body/1st intron       |
| cg10596298 | 3  | 107,938,447 | <i>IFT57</i>        | Gene body/1st intron       |
| cg10598353 | 6  | 31,783,466  | <i>HSPA1A</i>       | Gene body/5'UTR/1st exon   |
| cg10599446 | 3  | 189,073,674 | <i>N/A</i>          |                            |
| cg10606923 | 5  | 156,817,610 | <i>LOC102724404</i> | Gene body/1st intron       |
| cg10612692 | 12 | 130,957,675 | <i>RIMBP2</i>       | Gene body                  |
| cg10623263 | 18 | 48,189,108  | <i>MAPK4</i>        | Gene body/5'UTR/1st intron |
| cg10624122 | 7  | 19,158,747  | <i>TWIST1</i>       | TSS1500                    |
| cg10624462 | 17 | 79,958,316  | <i>ASPSCR1</i>      | Gene body                  |
| cg10626536 | 6  | 106,661,780 | <i>ATG5</i>         | Gene body                  |

|            |    |             |                  |                            |
|------------|----|-------------|------------------|----------------------------|
| cg10634241 | 20 | 52,295,101  | <i>N/A</i>       |                            |
| cg10641034 | 1  | 211,914,529 | <i>N/A</i>       |                            |
| cg10643406 | 19 | 24,097,411  | <i>ZNF726</i>    | TSS1500                    |
| cg10644659 | 7  | 101,740,892 | <i>CUX1</i>      | Gene body                  |
| cg10647825 | 4  | 36,395,876  | <i>N/A</i>       |                            |
| cg10658779 | 10 | 77,871,675  | <i>LRMDA</i>     | Gene body                  |
| cg10671433 | 6  | 129,803,863 | <i>LAMA2</i>     | Gene body                  |
| cg10672754 | 18 | 56,486,327  | <i>LINC01926</i> | Gene body/1st intron       |
| cg10690919 | 17 | 48,912,545  | <i>WFIKKN2</i>   | TSS200                     |
| cg10703784 | 12 | 28,127,353  | <i>N/A</i>       |                            |
| cg10707578 | 20 | 58,637,969  | <i>C20orf197</i> | Gene body/5'UTR            |
| cg10716666 | 5  | 142,275,963 | <i>ARHGAP26</i>  | Gene body                  |
| cg10732611 | 13 | 33,700,592  | <i>STARD13</i>   | Gene body                  |
| cg10733063 | 19 | 3,724,832   | <i>TJP3</i>      | Gene body/1st intron       |
| cg10751740 | 9  | 125,659,806 | <i>RC3H2</i>     | Gene body/5'UTR            |
| cg10769937 | 1  | 161,397,752 | <i>N/A</i>       |                            |
| cg10804487 | 6  | 152,136,586 | <i>ESR1</i>      | Gene body/5'UTR/1st intron |
| cg10830795 | 17 | 48,030,764  | <i>N/A</i>       |                            |
| cg10845890 | 7  | 50,765,616  | <i>GRB10</i>     | Gene body/5'UTR            |
| cg10854819 | 15 | 31,515,852  | <i>LOC283710</i> | Gene body                  |
| cg10879867 | 11 | 68,622,263  | <i>N/A</i>       |                            |
| cg10881958 | 3  | 30,323,657  | <i>N/A</i>       |                            |
| cg10889319 | 7  | 40,443,600  | <i>SUGCT</i>     | Gene body                  |
| cg10894781 | 11 | 36,453,286  | <i>PRR5L</i>     | Gene body                  |
| cg10897282 | 20 | 5,510,749   | <i>N/A</i>       |                            |
| cg10921334 | 6  | 119,529,888 | <i>MAN1A1</i>    | Gene body                  |
| cg10952765 | 10 | 82,841,950  | <i>N/A</i>       |                            |
| cg10968849 | 11 | 61,159,047  | <i>TMEM216</i>   | TSS1500                    |
| cg10973622 | 2  | 86,423,274  | <i>IMMT</i>      | TSS1500                    |
| cg10976807 | 15 | 94,625,741  | <i>LINC01581</i> | Gene body                  |
| cg10985726 | 4  | 47,534,993  | <i>ATP10D</i>    | Gene body                  |
| cg11010397 | 7  | 38,671,977  | <i>AMPH</i>      | TSS1500                    |
| cg11021927 | 6  | 129,983,370 | <i>ARHGAP18</i>  | Gene body/1st intron       |
| cg11026542 | 8  | 48,486,387  | <i>SPIDR</i>     | Gene body                  |
| cg11032168 | 1  | 90,473,929  | <i>ZNF326</i>    | Gene body                  |
| cg11037949 | 5  | 176,763,725 | <i>LMAN2</i>     | Gene body                  |
| cg11038484 | 19 | 52,076,076  | <i>ZNF175</i>    | Gene body/1st intron       |
| cg11039449 | 9  | 97,467,893  | <i>N/A</i>       |                            |
| cg11040735 | 14 | 56,845,236  | <i>N/A</i>       |                            |
| cg11047325 | 17 | 76,354,934  | <i>SOCS3</i>     | Gene body                  |
| cg11048518 | 4  | 108,815,434 | <i>SGMS2</i>     | Gene body/5'UTR/1st intron |
| cg11048797 | 17 | 80,450,903  | <i>N/A</i>       |                            |
| cg11060604 | 7  | 130,572,465 | <i>LINC-PINT</i> | Gene body                  |
| cg11064454 | 8  | 74,363,469  | <i>STAU2</i>     | Gene body                  |
| cg11067966 | 2  | 15,317,374  | <i>NBAS</i>      | Gene body                  |
| cg11106136 | 18 | 35,083,227  | <i>CELF4</i>     | Gene body/1st intron       |
| cg11112223 | 19 | 54,946,993  | <i>TTYH1</i>     | Gene body                  |
| cg11122009 | 17 | 63,554,536  | <i>AXIN2</i>     | Gene body                  |
| cg11132272 | 11 | 59,384,268  | <i>OSBP</i>      | TSS1500                    |
| cg11138740 | 7  | 27,903,718  | <i>JAZF1</i>     | Gene body                  |
| cg11141743 | 4  | 17,188,725  | <i>LINC02493</i> | TSS1500                    |
| cg11142038 | 5  | 137,169,427 | <i>N/A</i>       |                            |
| cg11155000 | 2  | 71,858,713  | <i>DYSF</i>      | Gene body                  |
| cg11170375 | 7  | 102,481,976 | <i>FAM185A</i>   | Gene body                  |
| cg11179695 | 6  | 129,982,785 | <i>ARHGAP18</i>  | Gene body/1st intron       |
| cg11184127 | 2  | 181,901,859 | <i>UBE2E3</i>    | Gene body                  |

|            |    |             |                     |                            |
|------------|----|-------------|---------------------|----------------------------|
| cg11185518 | 14 | 66,578,193  | <i>N/A</i>          |                            |
| cg11186626 | 3  | 195,954,860 | <i>SLC51A</i>       | Gene body                  |
| cg11188103 | 1  | 214,668,616 | <i>PTPN14</i>       | Gene body/5'UTR/1st intron |
| cg11197183 | 2  | 12,551,974  | <i>MIR3681HG</i>    | Gene body                  |
| cg11201447 | 8  | 128,808,063 | <i>MIR1204</i>      | TSS200                     |
| cg11201710 | 3  | 192,232,468 | <i>FGF12-AS2</i>    | TSS1500                    |
| cg11201869 | 6  | 8,652,918   | <i>HULC</i>         | Gene body/1st intron       |
| cg11203771 | 9  | 115,140,853 | <i>HSDL2</i>        | TSS1500                    |
| cg11207793 | 2  | 241,974,858 | <i>SNED1</i>        | Gene body                  |
| cg11209549 | 1  | 223,314,605 | <i>TLR5</i>         | Gene body/5'UTR            |
| cg11234772 | 4  | 3,372,929   | <i>RGS12</i>        | Gene body/1st intron       |
| cg11245928 | 22 | 38,244,767  | <i>ANKRD54</i>      | Gene body/5'UTR/1st exon   |
| cg11253820 | 17 | 75,475,231  | <i>9-Sep</i>        | Gene body/1st intron       |
| cg11258956 | 2  | 233,215,575 | <i>N/A</i>          |                            |
| cg11268585 | 5  | 1,039,552   | <i>N/A</i>          |                            |
| cg11280661 | 3  | 61,549,475  | <i>PTPRG</i>        | Gene body/1st intron       |
| cg11281576 | 7  | 3,284,026   | <i>N/A</i>          |                            |
| cg11284196 | 19 | 51,190,047  | <i>SHANK1</i>       | Gene body                  |
| cg11285173 | 6  | 136,356,596 | <i>PDE7B</i>        | Gene body                  |
| cg11299472 | 4  | 121,774,643 | <i>PRDM5</i>        | Gene body                  |
| cg11302943 | 10 | 99,790,596  | <i>CRTAC1</i>       | TSS200                     |
| cg11308335 | 8  | 110,241,570 | <i>N/A</i>          |                            |
| cg11310341 | 12 | 38,532,129  | <i>N/A</i>          |                            |
| cg11319592 | 3  | 188,850,137 | <i>N/A</i>          |                            |
| cg11329058 | 17 | 78,549,358  | <i>RPTOR</i>        | Gene body/1st intron       |
| cg11334510 | 10 | 17,104,215  | <i>CUBN</i>         | Gene body                  |
| cg11337097 | 2  | 100,254,880 | <i>AFF3</i>         | Gene body                  |
| cg11342676 | 3  | 160,203,780 | <i>TRIM59-IFT80</i> | TSS1500                    |
| cg11355363 | 18 | 21,980,685  | <i>N/A</i>          |                            |
| cg11356990 | 2  | 241,970,116 | <i>SNED1</i>        | Gene body                  |
| cg11374425 | 3  | 62,359,677  | <i>FEZF2</i>        | TSS1500                    |
| cg11385488 | 20 | 33,064,101  | <i>ITCH</i>         | Gene body                  |
| cg11386098 | 11 | 61,302,466  | <i>SYT7</i>         | Gene body                  |
| cg11414268 | 4  | 17,076,406  | <i>N/A</i>          |                            |
| cg11415369 | 7  | 5,452,872   | <i>TNRC18</i>       | Gene body                  |
| cg11417811 | 12 | 118,798,925 | <i>TAOK3</i>        | TSS1500                    |
| cg11446088 | 14 | 87,121,082  | <i>N/A</i>          |                            |
| cg11446449 | 8  | 135,842,613 | <i>N/A</i>          |                            |
| cg11468148 | 10 | 670,815     | <i>DIP2C</i>        | Gene body/1st intron       |
| cg11484741 | 8  | 123,141,816 | <i>N/A</i>          |                            |
| cg11485463 | 6  | 31,783,240  | <i>HSPA1A</i>       | TSS200                     |
| cg11493126 | 12 | 65,218,217  | <i>TBC1D30</i>      | TSS200                     |
| cg11500681 | 2  | 12,582,814  | <i>MIR3681HG</i>    | Gene body                  |
| cg11503167 | 12 | 98,618,243  | <i>N/A</i>          |                            |
| cg11507780 | 6  | 138,915,521 | <i>N/A</i>          |                            |
| cg11508123 | 6  | 129,796,679 | <i>LAMA2</i>        | Gene body                  |
| cg11523350 | 11 | 117,171,073 | <i>BACE1</i>        | Gene body/1st intron       |
| cg11536474 | 2  | 63,286,049  | <i>N/A</i>          |                            |
| cg11543126 | 10 | 135,374,546 | <i>SYCE1</i>        | Gene body/1st intron       |
| cg11551464 | 8  | 49,595,738  | <i>LOC101929268</i> | Gene body                  |
| cg11553308 | 2  | 236,479,382 | <i>AGAP1</i>        | Gene body/1st intron       |
| cg11553385 | 5  | 14,429,386  | <i>TRIO</i>         | Gene body                  |
| cg11572080 | 6  | 111,925,158 | <i>TRAF3IP2</i>     | Gene body/5'UTR/1st intron |
| cg11572979 | 9  | 98,209,971  | <i>PTCHI</i>        | Gene body                  |
| cg11573667 | 4  | 169,951,993 | <i>N/A</i>          |                            |
| cg11580094 | 6  | 130,151,697 | <i>N/A</i>          |                            |

|            |    |             |                     |                            |
|------------|----|-------------|---------------------|----------------------------|
| cg11580199 | 10 | 24,738,322  | <i>KIAA1217</i>     | TSS200                     |
| cg11610626 | 6  | 128,222,053 | <i>THEMIS</i>       | Gene body/1st exon         |
| cg11613578 | 1  | 43,612,195  | <i>FAM183A</i>      | TSS1500                    |
| cg11631271 | 19 | 38,700,487  | <i>N/A</i>          |                            |
| cg11632679 | 20 | 56,759,082  | <i>N/A</i>          |                            |
| cg11637648 | 4  | 13,907,689  | <i>LINC01182</i>    | Gene body                  |
| cg11642412 | 11 | 63,768,412  | <i>MACROD1</i>      | Gene body                  |
| cg11656752 | 17 | 1,892,589   | <i>RTN4RL1</i>      | Gene body/1st intron       |
| cg11659663 | 11 | 63,768,794  | <i>MACROD1</i>      | Gene body                  |
| cg11706829 | 14 | 70,448,266  | <i>SMOCl</i>        | Gene body                  |
| cg11709931 | 14 | 75,614,507  | <i>TMED10</i>       | Gene body                  |
| cg11714792 | 16 | 12,773,122  | <i>CPPED1</i>       | Gene body                  |
| cg11727053 | 4  | 26,703,062  | <i>TBC1D19</i>      | Gene body                  |
| cg11751964 | 19 | 2,905,983   | <i>ZNF57</i>        | TSS1500                    |
| cg11758280 | 20 | 9,153,867   | <i>PLCB4</i>        | Gene body/5'UTR/1st intron |
| cg11761483 | 17 | 70,723,386  | <i>SLC39A11</i>     | Gene body                  |
| cg11766619 | 1  | 150,448,887 | <i>RPRD2</i>        | Gene body/3'UTR            |
| cg11768476 | 7  | 157,293,544 | <i>N/A</i>          |                            |
| cg11787141 | 6  | 129,479,832 | <i>LAMA2</i>        | Gene body                  |
| cg11789321 | 5  | 56,773,063  | <i>N/A</i>          |                            |
| cg11795881 | 7  | 92,875,211  | <i>VPS50</i>        | Gene body/5'UTR            |
| cg11813690 | 12 | 111,664,723 | <i>CUX2</i>         | Gene body                  |
| cg11815910 | 6  | 167,366,826 | <i>RNASET2</i>      | Gene body/1st intron       |
| cg11822659 | 20 | 53,092,781  | <i>DOK5</i>         | Gene body/5'UTR/1st intron |
| cg11830902 | 2  | 106,392,414 | <i>NCK2</i>         | Gene body/5'UTR/1st intron |
| cg11832404 | 12 | 65,218,258  | <i>TBC1D30</i>      | TSS200                     |
| cg11840125 | 14 | 23,834,860  | <i>EFS</i>          | TSS200                     |
| cg11856929 | 19 | 50,071,672  | <i>NOSIP</i>        | Gene body/5'UTR            |
| cg11858226 | 7  | 2,548,262   | <i>N/A</i>          |                            |
| cg11862702 | 4  | 16,825,974  | <i>LDB2</i>         | Gene body/1st intron       |
| cg11864327 | 5  | 178,339,172 | <i>ZFP2</i>         | Gene body/5'UTR/1st intron |
| cg11865315 | 13 | 101,813,694 | <i>NALCN</i>        | Gene body                  |
| cg11866049 | 19 | 44,890,183  | <i>ZNF285</i>       | Gene body/3'UTR            |
| cg11875459 | 11 | 34,534,785  | <i>ELF5</i>         | Gene body/5'UTR/1st intron |
| cg11878377 | 7  | 95,761,155  | <i>SLC25A13</i>     | Gene body                  |
| cg11881202 | 14 | 73,712,967  | <i>LOC101928123</i> | TSS1500                    |
| cg11884080 | 4  | 121,625,220 | <i>PRDM5</i>        | Gene body/3'UTR            |
| cg11915444 | 2  | 12,237,012  | <i>MIR3681HG</i>    | Gene body                  |
| cg11920206 | 4  | 184,910,931 | <i>STOX2</i>        | Gene body/1st intron       |
| cg11935354 | 7  | 137,016,202 | <i>PTN</i>          | Gene body/5'UTR/1st intron |
| cg11956908 | 2  | 12,694,638  | <i>MIR3681HG</i>    | Gene body                  |
| cg11970327 | 7  | 40,529,988  | <i>SUGCT</i>        | Gene body                  |
| cg11982176 | 13 | 114,054,286 | <i>LOC101928841</i> | Gene body/3'UTR            |
| cg12018098 | 19 | 38,885,481  | <i>SPRED3</i>       | Gene body                  |
| cg12019801 | 18 | 74,114,708  | <i>ZNF516</i>       | Gene body                  |
| cg12024104 | 12 | 6,662,581   | <i>IFFO1</i>        | Gene body/1st intron       |
| cg12043062 | 5  | 140,729,723 | <i>PCDHGB1</i>      | TSS200                     |
| cg12045337 | 2  | 171,572,714 | <i>SP5</i>          | Gene body/1st intron       |
| cg12047941 | 11 | 315,908     | <i>N/A</i>          |                            |
| cg12047959 | 2  | 241,990,828 | <i>SNED1</i>        | Gene body                  |
| cg12061096 | 15 | 61,028,241  | <i>RORA</i>         | Gene body/1st intron       |
| cg12065969 | 15 | 94,643,799  | <i>LINC01581</i>    | Gene body/1st intron       |
| cg12081267 | 2  | 98,486,185  | <i>TMEM131</i>      | Gene body                  |
| cg12082922 | 10 | 134,296,088 | <i>N/A</i>          |                            |
| cg12086862 | 2  | 1,719,161   | <i>PXDN</i>         | Gene body/1st intron       |
| cg12088663 | 20 | 32,381,603  | <i>ZNF341-AS1</i>   | Gene body                  |



|            |    |             |                     |                            |
|------------|----|-------------|---------------------|----------------------------|
| cg12090003 | 19 | 17,516,282  | <i>BST2</i>         | Gene body/1st exon         |
| cg12096486 | 7  | 40,514,989  | <i>SUGCT</i>        | Gene body                  |
| cg12097222 | 8  | 16,885,000  | <i>MICU3</i>        | Gene body/1st exon         |
| cg12107770 | 4  | 55,874,429  | <i>N/A</i>          |                            |
| cg12124786 | 8  | 117,366,093 | <i>N/A</i>          |                            |
| cg12126732 | 10 | 3,568,207   | <i>LOC105376360</i> | Gene body/1st intron       |
| cg12130225 | 1  | 229,698,885 | <i>N/A</i>          |                            |
| cg12136387 | 12 | 116,820,108 | <i>N/A</i>          |                            |
| cg12136608 | 3  | 3,840,360   | <i>LRRN1</i>        | TSS1500                    |
| cg12139446 | 9  | 7,147,265   | <i>KDM4C</i>        | Gene body                  |
| cg12140760 | 7  | 122,387,020 | <i>CADPS2</i>       | Gene body/1st intron       |
| cg12140901 | 7  | 82,451,930  | <i>PCLO</i>         | Gene body                  |
| cg12149606 | 14 | 75,614,186  | <i>TMED10</i>       | Gene body                  |
| cg12150931 | 12 | 54,782,782  | <i>ZNF385A</i>      | Gene body/1st intron       |
| cg12164282 | 2  | 1,748,112   | <i>PXDN</i>         | Gene body/1st exon         |
| cg12172069 | 8  | 118,400,476 | <i>N/A</i>          |                            |
| cg12182937 | 6  | 33,215,649  | <i>N/A</i>          |                            |
| cg12183001 | 11 | 84,898,992  | <i>DLG2</i>         | Gene body                  |
| cg12210836 | 6  | 131,481,003 | <i>AKAP7</i>        | Gene body                  |
| cg12211577 | 18 | 9,514,326   | <i>RALBP1</i>       | Gene body                  |
| cg12214451 | 4  | 114,900,175 | <i>ARSJ</i>         | Gene body/5'UTR/1st exon   |
| cg12227872 | 16 | 31,298,223  | <i>ITGAM</i>        | Gene body                  |
| cg12245188 | 2  | 63,416,222  | <i>WDPCP</i>        | Gene body                  |
| cg12245358 | 4  | 84,468,038  | <i>GPAT3</i>        | Gene body                  |
| cg12248657 | 2  | 1,649,563   | <i>PXDN</i>         | Gene body                  |
| cg12253357 | 2  | 237,574,509 | <i>N/A</i>          |                            |
| cg12255061 | 17 | 63,533,152  | <i>AXIN2</i>        | Gene body                  |
| cg12256941 | 18 | 13,026,680  | <i>CEP192</i>       | Gene body                  |
| cg12258607 | 6  | 12,717,138  | <i>PHACTR1</i>      | Gene body/5'UTR/1st intron |
| cg12261055 | 7  | 41,860,801  | <i>N/A</i>          |                            |
| cg12271317 | 4  | 108,972,693 | <i>LEF1</i>         | Gene body/3'UTR            |
| cg12287936 | 5  | 1,800,606   | <i>MRPL36</i>       | TSS1500                    |
| cg12295918 | 3  | 46,506,481  | <i>LTF</i>          | Gene body/5'UTR/1st exon   |
| cg12296098 | 4  | 108,074,656 | <i>N/A</i>          |                            |
| cg12305805 | 4  | 93,103,551  | <i>N/A</i>          |                            |
| cg12307373 | 11 | 103,305,609 | <i>DYNC2H1</i>      | Gene body                  |
| cg12307484 | 7  | 19,158,721  | <i>TWIST1</i>       | TSS1500                    |
| cg12317461 | 11 | 47,177,507  | <i>C11orf49</i>     | Gene body                  |
| cg12319795 | 18 | 9,771,821   | <i>RAB31</i>        | Gene body/1st intron       |
| cg12322008 | 2  | 1,674,418   | <i>PXDN</i>         | Gene body                  |
| cg12324144 | 3  | 169,531,663 | <i>LRRC34</i>       | TSS1500                    |
| cg12326037 | 1  | 221,247,924 | <i>N/A</i>          |                            |
| cg12336460 | 17 | 80,104,076  | <i>CCDC57</i>       | Gene body                  |
| cg12339202 | 2  | 12,342,503  | <i>MIR3681HG</i>    | Gene body                  |
| cg12344459 | 11 | 47,431,510  | <i>SLC39A13</i>     | Gene body/5'UTR/1st intron |
| cg12373597 | 3  | 195,954,739 | <i>SLC51A</i>       | Gene body                  |
| cg12386285 | 4  | 121,786,690 | <i>PRDM5</i>        | Gene body                  |
| cg12395526 | 1  | 243,561,318 | <i>SDCCAG8</i>      | Gene body                  |
| cg12400025 | 6  | 111,913,206 | <i>TRAF3IP2</i>     | Gene body                  |
| cg12407140 | 11 | 116,228,734 | <i>N/A</i>          |                            |
| cg12419863 | 6  | 144,263,450 | <i>PLAGL1</i>       | Gene body                  |
| cg12427262 | 12 | 65,218,246  | <i>TBCID30</i>      | TSS200                     |
| cg12462471 | 5  | 57,753,672  | <i>PLK2</i>         | Gene body                  |
| cg12505541 | 12 | 16,329,122  | <i>N/A</i>          |                            |
| cg12548341 | 10 | 104,420,963 | <i>N/A</i>          |                            |
| cg12559119 | 17 | 63,590,575  | <i>N/A</i>          |                            |

|            |    |             |                     |                            |
|------------|----|-------------|---------------------|----------------------------|
| cg12559208 | 19 | 54,668,230  | <i>TMC4</i>         | Gene body                  |
| cg12573791 | 2  | 3,828,286   | <i>DCDC2C</i>       | Gene body                  |
| cg12582317 | 17 | 55,822,272  | <i>CCDC182</i>      | Gene body/1st exon         |
| cg12590430 | 7  | 38,468,944  | <i>AMPH</i>         | Gene body                  |
| cg12592874 | 13 | 78,292,692  | <i>SLAIN1</i>       | Gene body/1st intron       |
| cg12605630 | 12 | 115,215,105 | <i>N/A</i>          |                            |
| cg12621514 | 10 | 54,073,047  | <i>PRKG1-ASI</i>    | Gene body                  |
| cg12643185 | 2  | 25,751,265  | <i>DTNB</i>         | Gene body                  |
| cg12650721 | 3  | 177,169,008 | <i>LINC00578</i>    | Gene body/1st intron       |
| cg12655112 | 15 | 42,261,154  | <i>EHD4</i>         | Gene body/1st intron       |
| cg12667040 | 9  | 672,059     | <i>KANK1</i>        | Gene body/5'UTR/1st intron |
| cg12667818 | 8  | 7,750,650   | <i>DEFB4A</i>       | TSS1500                    |
| cg12675341 | 3  | 57,162,032  | <i>IL17RD</i>       | Gene body/1st intron       |
| cg12692286 | 7  | 40,441,089  | <i>SUGCT</i>        | Gene body                  |
| cg12694063 | 7  | 99,229,440  | <i>ZSCAN25</i>      | Gene body/3'UTR            |
| cg12712429 | 1  | 855,122     | <i>LOC100130417</i> | TSS200                     |
| cg12717591 | 10 | 7,205,138   | <i>SFMBT2</i>       | Gene body/3'UTR            |
| cg12721254 | 10 | 50,787,327  | <i>N/A</i>          |                            |
| cg12728465 | 7  | 99,612,529  | <i>ZKSCAN1</i>      | TSS1500                    |
| cg12731252 | 1  | 205,419,747 | <i>BLACAT1</i>      | Gene body/1st intron       |
| cg12734782 | 2  | 179,187,048 | <i>OSBPL6</i>       | Gene body/1st intron       |
| cg12737733 | 4  | 159,417,382 | <i>N/A</i>          |                            |
| cg12741994 | 3  | 170,137,321 | <i>CLDN11</i>       | Gene body/1st intron       |
| cg12744758 | 13 | 113,568,090 | <i>N/A</i>          |                            |
| cg12751277 | 1  | 231,954,287 | <i>DISC2</i>        | TSS200                     |
| cg12753986 | 6  | 7,469,052   | <i>N/A</i>          |                            |
| cg12778716 | 18 | 6,995,012   | <i>LAMA1</i>        | Gene body                  |
| cg12781304 | 20 | 56,806,982  | <i>N/A</i>          |                            |
| cg12789238 | 8  | 37,482,537  | <i>N/A</i>          |                            |
| cg12802625 | 3  | 3,841,252   | <i>LRRN1</i>        | Gene body/5'UTR/1st exon   |
| cg12814984 | 13 | 50,253,445  | <i>EBPL</i>         | Gene body/1st intron       |
| cg12821663 | 22 | 38,459,051  | <i>PICK1</i>        | Gene body                  |
| cg12827601 | 5  | 73,196,969  | <i>ARHGEF28</i>     | Gene body                  |
| cg12836958 | 4  | 186,132,412 | <i>SNX25</i>        | Gene body/5'UTR/1st intron |
| cg12839005 | 13 | 102,052,204 | <i>NALCN</i>        | Gene body/5'UTR/1st intron |
| cg12855313 | 17 | 80,524,455  | <i>FOXK2</i>        | Gene body                  |
| cg12870050 | 19 | 9,343,466   | <i>N/A</i>          |                            |
| cg12879693 | 5  | 57,185,442  | <i>N/A</i>          |                            |
| cg12904135 | 2  | 171,669,275 | <i>N/A</i>          |                            |
| cg12930683 | 7  | 40,335,673  | <i>SUGCT</i>        | Gene body                  |
| cg12937413 | 7  | 158,820,418 | <i>N/A</i>          |                            |
| cg12964792 | 1  | 229,335,776 | <i>N/A</i>          |                            |
| cg12977346 | 8  | 8,621,874   | <i>N/A</i>          |                            |
| cg12983149 | 8  | 11,839,797  | <i>DEFB135</i>      | TSS200                     |
| cg13004634 | 1  | 227,063,892 | <i>PSEN2</i>        | Gene body/5'UTR            |
| cg13008631 | 2  | 227,663,034 | <i>IRS1</i>         | Gene body/1st exon         |
| cg13011388 | 14 | 23,834,909  | <i>EFS</i>          | TSS200                     |
| cg13015925 | 3  | 147,125,114 | <i>ZIC4</i>         | TSS1500                    |
| cg13017471 | 3  | 171,832,308 | <i>FNDC3B</i>       | Gene body                  |
| cg13025230 | 8  | 25,119,327  | <i>DOCK5</i>        | Gene body                  |
| cg13045370 | 2  | 1,642,243   | <i>PXDN</i>         | Gene body                  |
| cg13069100 | 1  | 155,035,008 | <i>EFNA4</i>        | TSS1500                    |
| cg13071386 | 3  | 37,494,403  | <i>ITGA9</i>        | Gene body/1st intron       |
| cg13072017 | 12 | 93,257,180  | <i>EEA1</i>         | Gene body                  |
| cg13072927 | 1  | 95,550,619  | <i>N/A</i>          |                            |
| cg13084714 | 17 | 4,673,292   | <i>N/A</i>          |                            |

|            |    |             |                  |                            |
|------------|----|-------------|------------------|----------------------------|
| cg13098633 | 9  | 140,259,748 | <i>EXD3</i>      | Gene body                  |
| cg13101429 | 8  | 25,250,334  | <i>DOCK5</i>     | Gene body                  |
| cg13117045 | 11 | 35,080,265  | <i>N/A</i>       |                            |
| cg13120932 | 9  | 6,925,240   | <i>KDM4C</i>     | Gene body                  |
| cg13120998 | 3  | 57,162,039  | <i>IL17RD</i>    | Gene body/1st intron       |
| cg13122633 | 1  | 152,133,193 | <i>RPTN</i>      | TSS1500                    |
| cg13126667 | 9  | 91,938,656  | <i>SECISBP2</i>  | Gene body/5'UTR            |
| cg13127808 | 6  | 58,684,856  | <i>N/A</i>       |                            |
| cg13136933 | 15 | 57,592,040  | <i>LINC00926</i> | TSS1500                    |
| cg13151425 | 7  | 2,561,116   | <i>LFNG</i>      | Gene body/1st intron       |
| cg13173692 | 7  | 46,501,259  | <i>N/A</i>       |                            |
| cg13177778 | 11 | 92,900,159  | <i>SLC36A4</i>   | Gene body                  |
| cg13184674 | 16 | 71,576,450  | <i>N/A</i>       |                            |
| cg13186155 | 1  | 86,063,729  | <i>N/A</i>       |                            |
| cg13197094 | 9  | 686,714     | <i>KANK1</i>     | TSS200                     |
| cg13206794 | 2  | 242,010,703 | <i>SNED1</i>     | Gene body                  |
| cg13211657 | 12 | 9,768,149   | <i>N/A</i>       |                            |
| cg13224922 | 10 | 125,510,699 | <i>CPXM2</i>     | Gene body                  |
| cg13226072 | 3  | 168,809,227 | <i>MECOM</i>     | Gene body                  |
| cg13235447 | 9  | 21,385,440  | <i>IFNA2</i>     | TSS200                     |
| cg13240017 | 1  | 230,777,744 | <i>COG2</i>      | TSS1500                    |
| cg13240962 | 1  | 216,467,049 | <i>USH2A</i>     | Gene body                  |
| cg13270467 | 22 | 46,869,590  | <i>CELSR1</i>    | Gene body/1st intron       |
| cg13318964 | 6  | 32,337,970  | <i>C6orf10</i>   | Gene body/1st intron       |
| cg13321688 | 3  | 125,120,406 | <i>N/A</i>       |                            |
| cg13332142 | 3  | 27,575,278  | <i>N/A</i>       |                            |
| cg13337095 | 3  | 169,531,783 | <i>LRRC34</i>    | TSS1500                    |
| cg13343932 | 17 | 76,355,061  | <i>SOCS3</i>     | Gene body                  |
| cg13344434 | 6  | 35,570,573  | <i>FKBP5</i>     | Gene body                  |
| cg13349726 | 14 | 51,886,656  | <i>N/A</i>       |                            |
| cg13355416 | 17 | 73,933,856  | <i>FBF1</i>      | Gene body/1st intron       |
| cg13363958 | 7  | 41,866,415  | <i>N/A</i>       |                            |
| cg13392320 | 7  | 40,788,535  | <i>SUGCT</i>     | Gene body                  |
| cg13403290 | 11 | 3,742,336   | <i>NUP98</i>     | Gene body                  |
| cg13404065 | 6  | 134,285,399 | <i>TBPL1</i>     | Gene body/5'UTR/1st intron |
| cg13405882 | 12 | 129,337,871 | <i>GLT1D1</i>    | TSS200                     |
| cg13420366 | 1  | 205,276,235 | <i>NUAK2</i>     | Gene body                  |
| cg13427753 | 6  | 45,406,009  | <i>RUNX2</i>     | Gene body                  |
| cg13457522 | 9  | 99,615,182  | <i>ZNF782</i>    | Gene body/5'UTR/1st intron |
| cg13459801 | 2  | 236,479,171 | <i>AGAP1</i>     | Gene body/1st intron       |
| cg13469814 | 10 | 92,615,063  | <i>HTR7</i>      | Gene body/1st intron       |
| cg13470015 | 12 | 1,662,503   | <i>N/A</i>       |                            |
| cg13472192 | 1  | 41,350,014  | <i>N/A</i>       |                            |
| cg13480465 | 4  | 16,795,757  | <i>LDB2</i>      | Gene body/1st intron       |
| cg13518824 | 1  | 8,523,537   | <i>RERE</i>      | Gene body                  |
| cg13536060 | 19 | 51,189,671  | <i>SHANK1</i>    | Gene body                  |
| cg13538267 | 4  | 121,722,591 | <i>PRDM5</i>     | Gene body                  |
| cg13552201 | 20 | 57,090,104  | <i>APCDD1L</i>   | TSS200                     |
| cg13553997 | 6  | 42,161,424  | <i>GUCA1B</i>    | Gene body/1st intron       |
| cg13562929 | 10 | 7,294,271   | <i>SFMBT2</i>    | Gene body                  |
| cg13576593 | 12 | 15,774,321  | <i>EPS8</i>      | Gene body                  |
| cg13579295 | 9  | 140,069,745 | <i>ANAPC2</i>    | Gene body                  |
| cg13584000 | 20 | 10,448,859  | <i>SLX4IP</i>    | Gene body                  |
| cg13594900 | 17 | 80,563,219  | <i>N/A</i>       |                            |
| cg13606287 | 9  | 5,672,070   | <i>RIC1</i>      | Gene body                  |
| cg13614409 | 13 | 31,506,752  | <i>TEX26-AS1</i> | TSS200                     |

|            |    |             |                  |                            |
|------------|----|-------------|------------------|----------------------------|
| cg13623749 | 6  | 15,329,886  | <i>JARID2</i>    | Gene body/5'UTR/1st intron |
| cg13630451 | 16 | 23,407,244  | <i>COG7</i>      | Gene body                  |
| cg13632935 | 9  | 130,207,507 | <i>ZNF79</i>     | Gene body/3'UTR            |
| cg13636371 | 9  | 117,264,095 | <i>WHRN</i>      | Gene body/5'UTR/1st intron |
| cg13649561 | 22 | 46,442,103  | <i>LINC00899</i> | TSS1500                    |
| cg13677149 | 7  | 27,284,789  | <i>EVX1-AS</i>   | Gene body/1st intron       |
| cg13680337 | 10 | 71,626,580  | <i>COL13A1</i>   | Gene body                  |
| cg13680468 | 2  | 241,544,666 | <i>GPR35</i>     | TSS200                     |
| cg13682224 | 5  | 93,125,031  | <i>FAM172A</i>   | Gene body                  |
| cg13686184 | 21 | 37,258,354  | <i>PPP1R2P2</i>  | TSS1500                    |
| cg13687039 | 3  | 142,683,153 | <i>PAQR9-AS1</i> | Gene body/1st intron       |
| cg13689699 | 9  | 137,225,311 | <i>RXRA</i>      | Gene body/1st intron       |
| cg13694044 | 2  | 207,408,220 | <i>ADAM23</i>    | Gene body                  |
| cg13697856 | 14 | 71,496,088  | <i>PCNX1</i>     | Gene body                  |
| cg13706362 | 8  | 38,178,467  | <i>NSD3</i>      | Gene body                  |
| cg13711885 | 3  | 113,821,393 | <i>N/A</i>       |                            |
| cg13713046 | 8  | 22,500,019  | <i>BIN3-IT1</i>  | TSS1500                    |
| cg13725340 | 9  | 135,432,492 | <i>CFAP77</i>    | Gene body                  |
| cg13732761 | 15 | 94,582,452  | <i>LINC01581</i> | Gene body                  |
| cg13743251 | 13 | 101,802,612 | <i>NALCN</i>     | Gene body                  |
| cg13755157 | 11 | 33,904,715  | <i>LMO2</i>      | Gene body/5'UTR/1st intron |
| cg13765638 | 14 | 38,110,448  | <i>TTC6</i>      | Gene body                  |
| cg13773247 | 2  | 42,276,988  | <i>PKDCC</i>     | Gene body/1st intron       |
| cg13774342 | 13 | 50,702,795  | <i>DLEU1</i>     | Gene body                  |
| cg13783936 | 6  | 54,547,974  | <i>N/A</i>       |                            |
| cg13784966 | 10 | 3,158,710   | <i>PFKP</i>      | Gene body                  |
| cg13793580 | 3  | 169,540,297 | <i>LRR1Q4</i>    | Gene body/1st exon         |
| cg13794868 | 17 | 9,998,770   | <i>GAS7</i>      | Gene body/1st intron       |
| cg13805884 | 9  | 37,627,045  | <i>N/A</i>       |                            |
| cg13811060 | 1  | 14,935,373  | <i>KAZN</i>      | Gene body/1st intron       |
| cg13815212 | 17 | 59,018,561  | <i>BCAS3</i>     | Gene body                  |
| cg13819913 | 8  | 128,138,702 | <i>N/A</i>       |                            |
| cg13835272 | 7  | 40,487,152  | <i>SUGCT</i>     | Gene body                  |
| cg13837834 | 5  | 180,728,293 | <i>N/A</i>       |                            |
| cg13846358 | 9  | 135,115,582 | <i>NTNG2</i>     | Gene body                  |
| cg13849029 | 5  | 15,935,993  | <i>FBXL7</i>     | Gene body                  |
| cg13857646 | 9  | 140,356,757 | <i>PNPLA7</i>    | Gene body                  |
| cg13873632 | 4  | 16,853,974  | <i>LDB2</i>      | Gene body                  |
| cg13877109 | 6  | 15,331,247  | <i>JARID2</i>    | Gene body/5'UTR/1st intron |
| cg13888854 | 2  | 102,643,898 | <i>ILIR2</i>     | Gene body                  |
| cg13898510 | 10 | 12,087,933  | <i>N/A</i>       |                            |
| cg13900773 | 12 | 130,824,015 | <i>PIWIL1</i>    | Gene body/5'UTR/1st intron |
| cg13908752 | 14 | 79,220,657  | <i>NRXN3</i>     | Gene body                  |
| cg13911116 | 1  | 11,174,850  | <i>MTOR</i>      | Gene body                  |
| cg13930892 | 11 | 2,292,000   | <i>ASCL2</i>     | Gene body/5'UTR/1st exon   |
| cg13949121 | 16 | 12,244,473  | <i>SNX29</i>     | Gene body                  |
| cg13950037 | 1  | 156,431,140 | <i>N/A</i>       |                            |
| cg13954022 | 13 | 106,825,650 | <i>N/A</i>       |                            |
| cg13968061 | 1  | 159,557,257 | <i>APCS</i>      | TSS1500                    |
| cg13970113 | 12 | 63,314,036  | <i>PPMIH</i>     | Gene body/1st intron       |
| cg13975924 | 11 | 124,007,252 | <i>VWA5A</i>     | Gene body                  |
| cg13977545 | 4  | 17,076,609  | <i>N/A</i>       |                            |
| cg13980623 | 22 | 29,328,962  | <i>ZNRF3</i>     | Gene body/5'UTR/1st intron |
| cg13987922 | 5  | 96,039,870  | <i>CAST</i>      | Gene body/5'UTR/1st intron |
| cg14002739 | 18 | 59,680,370  | <i>N/A</i>       |                            |
| cg14006863 | 3  | 121,903,107 | <i>CASR</i>      | TSS200                     |

|            |    |             |                  |                            |
|------------|----|-------------|------------------|----------------------------|
| cg14011419 | 2  | 1,494,681   | <i>TPO</i>       | Gene body                  |
| cg14019323 | 12 | 65,218,413  | <i>TBC1D30</i>   | Gene body/5'UTR/1st exon   |
| cg14029723 | 3  | 14,470,999  | <i>SLC6A6</i>    | Gene body/5'UTR            |
| cg14035861 | 12 | 131,129,172 | <i>RIMBP2</i>    | Gene body/5'UTR/1st intron |
| cg14037665 | 2  | 1,748,617   | <i>PXDN</i>      | TSS1500                    |
| cg14040735 | 5  | 149,857,155 | <i>NDST1-AS1</i> | Gene body                  |
| cg14042214 | 1  | 176,918,515 | <i>ASTN1</i>     | Gene body                  |
| cg14048271 | 19 | 35,577,342  | <i>HPN-AS1</i>   | Gene body                  |
| cg14054883 | 9  | 93,619,467  | <i>SYK</i>       | Gene body                  |
| cg14114910 | 9  | 124,924,045 | <i>MORN5</i>     | Gene body/1st intron       |
| cg14118690 | 11 | 47,431,358  | <i>SLC39A13</i>  | Gene body/5'UTR/1st intron |
| cg14123640 | 13 | 101,725,305 | <i>NALCN</i>     | Gene body                  |
| cg14135079 | 6  | 129,162,860 | <i>N/A</i>       |                            |
| cg14154406 | 18 | 52,792,171  | <i>LINC01929</i> | TSS1500                    |
| cg14172797 | 17 | 64,428,103  | <i>PRKCA</i>     | Gene body                  |
| cg14185105 | 6  | 97,264,803  | <i>GPR63</i>     | Gene body/5'UTR/1st intron |
| cg14189106 | 8  | 95,284,951  | <i>N/A</i>       |                            |
| cg14193129 | 9  | 16,964,111  | <i>N/A</i>       |                            |
| cg14204166 | 11 | 19,886,789  | <i>NAV2</i>      | Gene body                  |
| cg14205239 | 20 | 24,872,950  | <i>N/A</i>       |                            |
| cg14210790 | 15 | 70,877,277  | <i>LINC02204</i> | Gene body/1st intron       |
| cg14228830 | 3  | 139,257,229 | <i>RBPI</i>      | Gene body                  |
| cg14239515 | 19 | 38,885,242  | <i>SPRED3</i>    | Gene body                  |
| cg14252571 | 3  | 172,066,038 | <i>FNDC3B</i>    | Gene body                  |
| cg14255238 | 2  | 97,216,131  | <i>ARID5A</i>    | Gene body                  |
| cg14263858 | 19 | 4,328,745   | <i>STAP2</i>     | Gene body                  |
| cg14276730 | 20 | 40,040,268  | <i>CHD6</i>      | Gene body                  |
| cg14277284 | 5  | 134,463,795 | <i>C5orf66</i>   | Gene body/5'UTR            |
| cg14283647 | 2  | 227,662,014 | <i>IRS1</i>      | Gene body/1st exon         |
| cg14299508 | 8  | 105,907,690 | <i>N/A</i>       |                            |
| cg14307214 | 9  | 98,210,236  | <i>PTCHI</i>     | Gene body                  |
| cg14324694 | 19 | 52,099,597  | <i>N/A</i>       |                            |
| cg14331280 | 18 | 30,501,500  | <i>N/A</i>       |                            |
| cg14344348 | 4  | 84,519,514  | <i>GPAT3</i>     | Gene body                  |
| cg14361672 | 9  | 131,463,936 | <i>PKN3</i>      | TSS1500                    |
| cg14370314 | 14 | 23,834,891  | <i>EFS</i>       | TSS200                     |
| cg14386312 | 19 | 58,740,861  | <i>ZNF544</i>    | Gene body/5'UTR            |
| cg14387131 | 3  | 47,702,867  | <i>SMARCC1</i>   | Gene body                  |
| cg14392344 | 3  | 192,653,178 | <i>N/A</i>       |                            |
| cg14417226 | 14 | 64,702,172  | <i>ESR2</i>      | Gene body                  |
| cg14419882 | 10 | 79,770,315  | <i>POLR3A</i>    | Gene body                  |
| cg14425611 | 5  | 14,842,464  | <i>ANKH</i>      | Gene body/1st intron       |
| cg14431397 | 13 | 101,829,809 | <i>NALCN</i>     | Gene body                  |
| cg14440538 | 7  | 94,829,240  | <i>PPP1R9A</i>   | Gene body                  |
| cg14463995 | 9  | 139,048,330 | <i>N/A</i>       |                            |
| cg14477471 | 9  | 137,107,162 | <i>N/A</i>       |                            |
| cg14477868 | 5  | 92,938,260  | <i>N/A</i>       |                            |
| cg14479638 | 11 | 35,424,344  | <i>SLC1A2</i>    | Gene body/1st intron       |
| cg14481528 | 1  | 110,933,996 | <i>SLC16A4</i>   | TSS1500                    |
| cg14483137 | 12 | 12,837,495  | <i>GPR19</i>     | Gene body/5'UTR            |
| cg14496842 | 10 | 125,510,586 | <i>CPXM2</i>     | Gene body                  |
| cg14499053 | 7  | 19,158,954  | <i>N/A</i>       |                            |
| cg14508326 | 22 | 35,101,496  | <i>N/A</i>       |                            |
| cg14515424 | 2  | 97,193,524  | <i>N/A</i>       |                            |
| cg14518185 | 14 | 68,648,563  | <i>RAD51B</i>    | Gene body                  |
| cg14531663 | 6  | 32,116,933  | <i>PRRT1</i>     | Gene body/3'UTR            |

|            |    |             |                     |                            |
|------------|----|-------------|---------------------|----------------------------|
| cg14534279 | 10 | 3,329,966   | <i>N/A</i>          |                            |
| cg14557268 | 17 | 29,596,696  | <i>NF1</i>          | Gene body                  |
| cg14564638 | 1  | 173,835,211 | <i>SNORD44</i>      | TSS200                     |
| cg14567963 | 13 | 112,815,866 | <i>LOC100506016</i> | TSS1500                    |
| cg14574514 | 2  | 241,986,007 | <i>SNED1</i>        | Gene body                  |
| cg14581989 | 5  | 174,226,298 | <i>N/A</i>          |                            |
| cg14597098 | 7  | 949,390     | <i>ADAPI</i>        | Gene body                  |
| cg14599380 | 4  | 17,310,680  | <i>N/A</i>          |                            |
| cg14602087 | 8  | 37,556,386  | <i>ZNF703</i>       | Gene body/3'UTR            |
| cg14624145 | 17 | 37,024,169  | <i>N/A</i>          |                            |
| cg14624950 | 17 | 62,577,106  | <i>SMURF2</i>       | Gene body                  |
| cg14629595 | 18 | 74,092,327  | <i>ZNF516</i>       | Gene body                  |
| cg14638091 | 17 | 46,225,864  | <i>SKAPI</i>        | Gene body                  |
| cg14642562 | 1  | 230,717,560 | <i>N/A</i>          |                            |
| cg14644378 | 9  | 34,988,588  | <i>DNAJB5-ASI</i>   | Gene body/1st intron       |
| cg14646893 | 6  | 143,592,425 | <i>AIG1</i>         | Gene body                  |
| cg14652403 | 4  | 993,803     | <i>IDUA</i>         | Gene body                  |
| cg14657514 | 1  | 17,305,253  | <i>MFAP2</i>        | Gene body/5'UTR/1st intron |
| cg14668986 | 3  | 114,477,999 | <i>ZBTB20</i>       | Gene body/5'UTR/1st exon   |
| cg14679421 | 10 | 74,606,227  | <i>MCU</i>          | Gene body                  |
| cg14688317 | 5  | 1,117,702   | <i>N/A</i>          |                            |
| cg14696743 | 13 | 101,838,744 | <i>NALCN</i>        | Gene body                  |
| cg14700282 | 17 | 38,182,487  | <i>MED24</i>        | Gene body                  |
| cg14702263 | 4  | 121,684,464 | <i>PRDM5</i>        | Gene body                  |
| cg14702570 | 2  | 74,259,524  | <i>TET3</i>         | Gene body                  |
| cg14704124 | 12 | 132,514,956 | <i>SNORA49</i>      | TSS1500                    |
| cg14704980 | 7  | 41,607,500  | <i>N/A</i>          |                            |
| cg14707961 | 6  | 129,691,120 | <i>LAMA2</i>        | Gene body                  |
| cg14708990 | 11 | 76,839,217  | <i>MYO7A</i>        | TSS200                     |
| cg14723524 | 2  | 207,188,646 | <i>N/A</i>          |                            |
| cg14740860 | 8  | 144,572,001 | <i>ZC3H3</i>        | Gene body                  |
| cg14757228 | 6  | 32,116,858  | <i>PRRT1</i>        | Gene body/3'UTR            |
| cg14762528 | 13 | 101,746,298 | <i>NALCN</i>        | Gene body                  |
| cg14767619 | 2  | 241,988,881 | <i>SNED1</i>        | Gene body                  |
| cg14772800 | 3  | 127,796,115 | <i>RUVBL1-ASI</i>   | Gene body/1st intron       |
| cg14779973 | 10 | 115,949,613 | <i>TDRD1</i>        | Gene body                  |
| cg14784497 | 3  | 3,841,457   | <i>LRRN1</i>        | Gene body/5'UTR/1st exon   |
| cg14787753 | 2  | 168,917,992 | <i>STK39</i>        | Gene body                  |
| cg14787880 | 2  | 203,244,123 | <i>BMPR2</i>        | Gene body/1st intron       |
| cg14789142 | 6  | 148,589,223 | <i>N/A</i>          |                            |
| cg14812036 | 10 | 82,895,774  | <i>N/A</i>          |                            |
| cg14843038 | 4  | 57,813,082  | <i>N/A</i>          |                            |
| cg14858993 | 7  | 2,797,231   | <i>GNA12</i>        | Gene body/1st intron       |
| cg14859618 | 2  | 218,900,294 | <i>RUFY4</i>        | Gene body                  |
| cg14867732 | 1  | 176,918,289 | <i>ASTN1</i>        | Gene body                  |
| cg14878768 | 13 | 32,484,003  | <i>EEF1DP3</i>      | Gene body/1st intron       |
| cg14890025 | 8  | 126,668,111 | <i>N/A</i>          |                            |
| cg14902204 | 2  | 131,046,313 | <i>N/A</i>          |                            |
| cg14907617 | 2  | 160,025,801 | <i>TANCI</i>        | Gene body                  |
| cg14926196 | 6  | 37,616,482  | <i>MDGA1</i>        | Gene body                  |
| cg14933993 | 21 | 45,341,553  | <i>AGPAT3</i>       | Gene body/5'UTR            |
| cg14947955 | 14 | 50,877,341  | <i>N/A</i>          |                            |
| cg14977018 | 3  | 194,314,457 | <i>TMEM44</i>       | Gene body                  |
| cg14984824 | 2  | 201,725,800 | <i>CLK1</i>         | Gene body                  |
| cg14990252 | 10 | 125,691,586 | <i>N/A</i>          |                            |
| cg14991769 | 7  | 150,497,157 | <i>TMEM176B</i>     | Gene body/5'UTR/1st intron |

|            |    |             |                   |                            |
|------------|----|-------------|-------------------|----------------------------|
| cg15002294 | 3  | 147,126,444 | <i>ZIC1</i>       | TSS1500                    |
| cg15013527 | 11 | 316,339     | <i>N/A</i>        |                            |
| cg15016701 | 12 | 63,211,683  | <i>PPM1H</i>      | Gene body                  |
| cg15018838 | 6  | 129,661,398 | <i>LAMA2</i>      | Gene body                  |
| cg15045356 | 11 | 11,969,590  | <i>USP47</i>      | Gene body                  |
| cg15058210 | 2  | 240,196,877 | <i>HDAC4</i>      | Gene body                  |
| cg15066822 | 13 | 52,352,312  | <i>DHRS12</i>     | Gene body                  |
| cg15082034 | 8  | 1,457,142   | <i>DLGAP2</i>     | Gene body                  |
| cg15085603 | 19 | 49,250,252  | <i>IZUMO1</i>     | TSS200                     |
| cg15085668 | 12 | 123,626,924 | <i>N/A</i>        |                            |
| cg15095727 | 3  | 138,311,508 | <i>CEP70</i>      | TSS1500                    |
| cg15095922 | 5  | 1,800,542   | <i>MRPL36</i>     | TSS1500                    |
| cg15106134 | 3  | 181,428,466 | <i>SOX2</i>       | TSS1500                    |
| cg15128259 | 3  | 98,625,121  | <i>N/A</i>        |                            |
| cg15134099 | 5  | 176,764,116 | <i>LMAN2</i>      | Gene body                  |
| cg15142311 | 7  | 86,543,180  | <i>KIAA1324L</i>  | Gene body                  |
| cg15157151 | 12 | 9,917,374   | <i>N/A</i>        |                            |
| cg15173475 | 2  | 230,995,921 | <i>N/A</i>        |                            |
| cg15176020 | 13 | 100,743,795 | <i>PCCA</i>       | Gene body/5'UTR/1st intron |
| cg15200680 | 4  | 143,486,249 | <i>INPP4B</i>     | Gene body/5'UTR            |
| cg15209695 | 14 | 75,614,650  | <i>TMED10</i>     | Gene body                  |
| cg15233611 | 12 | 122,244,660 | <i>SETD1B</i>     | Gene body                  |
| cg15238531 | 17 | 49,512,913  | <i>LINC02073</i>  | Gene body/1st exon         |
| cg15239627 | 7  | 120,918,492 | <i>CPED1</i>      | Gene body                  |
| cg15255896 | 3  | 147,124,665 | <i>ZIC4</i>       | TSS200                     |
| cg15258829 | 10 | 114,145,251 | <i>ACSL5</i>      | Gene body/1st intron       |
| cg15261665 | 3  | 46,506,374  | <i>LTF</i>        | Gene body/5'UTR/1st exon   |
| cg15264878 | 13 | 77,000,241  | <i>N/A</i>        |                            |
| cg15270381 | 17 | 5,163,370   | <i>N/A</i>        |                            |
| cg15272974 | 15 | 64,130,186  | <i>N/A</i>        |                            |
| cg15276256 | 12 | 130,590,197 | <i>N/A</i>        |                            |
| cg15278646 | 15 | 28,341,980  | <i>OCA2</i>       | Gene body/5'UTR/1st intron |
| cg15285154 | 4  | 142,834,151 | <i>N/A</i>        |                            |
| cg15286206 | 15 | 38,233,268  | <i>TMCO5A</i>     | Gene body                  |
| cg15290913 | 8  | 38,884,010  | <i>ADAM9</i>      | Gene body                  |
| cg15293422 | 2  | 37,897,716  | <i>CDC42EP3</i>   | Gene body/5'UTR/1st intron |
| cg15299978 | 11 | 111,176,294 | <i>COLCA1</i>     | TSS1500                    |
| cg15315093 | 12 | 564,614     | <i>N/A</i>        |                            |
| cg15326755 | 17 | 25,620,596  | <i>WSB1</i>       | TSS1500                    |
| cg15331751 | 1  | 25,674,235  | <i>TMEM50A</i>    | Gene body                  |
| cg15341124 | 14 | 102,027,734 | <i>DIO3</i>       | Gene body/5'UTR/1st exon   |
| cg15357156 | 1  | 23,884,373  | <i>N/A</i>        |                            |
| cg15374435 | 13 | 80,911,692  | <i>SPRY2</i>      | Gene body                  |
| cg15384323 | 7  | 135,611,104 | <i>N/A</i>        |                            |
| cg15386377 | 5  | 38,591,594  | <i>LIFR</i>       | Gene body/5'UTR/1st intron |
| cg15389749 | 13 | 50,702,675  | <i>DLEU1</i>      | Gene body                  |
| cg15390986 | 1  | 117,558,768 | <i>CD101</i>      | Gene body                  |
| cg15391359 | 11 | 14,995,536  | <i>N/A</i>        |                            |
| cg15401862 | 12 | 70,824,537  | <i>KCNMB4</i>     | Gene body/3'UTR            |
| cg15416487 | 6  | 111,920,977 | <i>TRAF3IP2</i>   | Gene body                  |
| cg15423315 | 10 | 93,296,554  | <i>HECTD2-AS1</i> | Gene body                  |
| cg15423654 | 1  | 158,217,942 | <i>CD1A</i>       | TSS200                     |
| cg15430455 | 5  | 134,463,803 | <i>C5orf66</i>    | Gene body/5'UTR            |
| cg15430504 | 13 | 24,075,091  | <i>N/A</i>        |                            |
| cg15438703 | 13 | 96,295,657  | <i>DZIP1</i>      | Gene body/5'UTR            |
| cg15453482 | 11 | 65,561,749  | <i>OVOL1</i>      | Gene body                  |

|            |    |             |                   |                            |
|------------|----|-------------|-------------------|----------------------------|
| cg15474402 | 4  | 188,953,969 | <i>N/A</i>        |                            |
| cg15476994 | 6  | 130,114,801 | <i>N/A</i>        |                            |
| cg15507901 | 3  | 107,097,413 | <i>CCDC54</i>     | Gene body/1st exon         |
| cg15509361 | 7  | 19,183,325  | <i>N/A</i>        |                            |
| cg15529692 | 20 | 55,840,433  | <i>BMP7</i>       | Gene body/1st intron       |
| cg15543489 | 19 | 46,527,546  | <i>PGLYRP1</i>    | TSS1500                    |
| cg15548101 | 3  | 186,078,640 | <i>DGKG</i>       | Gene body/5'UTR/1st intron |
| cg15562758 | 2  | 15,209,081  | <i>N/A</i>        |                            |
| cg15570148 | 3  | 61,235,985  | <i>FHIT</i>       | Gene body/5'UTR/1st intron |
| cg15600488 | 8  | 17,271,119  | <i>MTMR7</i>      | TSS200                     |
| cg15605600 | 10 | 94,447,516  | <i>N/A</i>        |                            |
| cg15619756 | 16 | 17,436,933  | <i>XYLT1</i>      | Gene body                  |
| cg15643983 | 3  | 113,935,129 | <i>N/A</i>        |                            |
| cg15646593 | 4  | 121,684,353 | <i>PRDM5</i>      | Gene body                  |
| cg15656474 | 15 | 69,945,291  | <i>PCAT29</i>     | Gene body/1st intron       |
| cg15672972 | 12 | 120,484,844 | <i>BICDL1</i>     | Gene body                  |
| cg15676711 | 1  | 8,072,453   | <i>ERRF11</i>     | Gene body/3'UTR            |
| cg15693937 | 5  | 76,429,218  | <i>ZBED3-AS1</i>  | Gene body                  |
| cg15708127 | 1  | 224,914,799 | <i>CNIH3</i>      | Gene body                  |
| cg15714846 | 2  | 208,631,684 | <i>FZD5</i>       | Gene body/3'UTR            |
| cg15724945 | 1  | 119,548,527 | <i>N/A</i>        |                            |
| cg15727329 | 2  | 74,979,542  | <i>N/A</i>        |                            |
| cg15735438 | 13 | 113,349,625 | <i>ATP11A</i>     | Gene body/1st intron       |
| cg15735954 | 19 | 54,972,723  | <i>LENG8</i>      | Gene body/3'UTR            |
| cg15747192 | 20 | 5,824,829   | <i>C20orf196</i>  | Gene body                  |
| cg15756055 | 2  | 39,645,955  | <i>MAP4K3</i>     | Gene body/1st intron       |
| cg15759721 | 17 | 57,918,630  | <i>MIR21</i>      | Gene body/1st exon         |
| cg15768901 | 19 | 41,120,329  | <i>LTBP4</i>      | Gene body                  |
| cg15770225 | 10 | 115,479,194 | <i>CASP7</i>      | Gene body/1st intron       |
| cg15776244 | 2  | 71,091,885  | <i>N/A</i>        |                            |
| cg15778867 | 6  | 97,638,598  | <i>MMS22L</i>     | Gene body                  |
| cg15791967 | 1  | 111,211,473 | <i>KCNA3</i>      | Gene body/1st intron       |
| cg15799828 | 4  | 4,413,914   | <i>NSG1</i>       | Gene body                  |
| cg15801019 | 6  | 129,203,783 | <i>LAMA2</i>      | TSS1500                    |
| cg15830572 | 1  | 1,593,874   | <i>SLC35E2B</i>   | Gene body/3'UTR            |
| cg15852849 | 19 | 2,381,516   | <i>N/A</i>        |                            |
| cg15858917 | 10 | 88,621,211  | <i>BMPRIA</i>     | Gene body/5'UTR            |
| cg15880760 | 17 | 48,546,290  | <i>CHAD</i>       | TSS200                     |
| cg15888552 | 20 | 19,055,428  | <i>N/A</i>        |                            |
| cg15892872 | 20 | 56,412,647  | <i>N/A</i>        |                            |
| cg15897845 | 1  | 233,249,314 | <i>PCNX2</i>      | Gene body                  |
| cg15905507 | 8  | 81,209,647  | <i>N/A</i>        |                            |
| cg15909232 | 7  | 156,235,420 | <i>LOC285889</i>  | Gene body/1st intron       |
| cg15918459 | 6  | 10,411,444  | <i>TFAP2A-AS1</i> | TSS1500                    |
| cg15925374 | 20 | 8,412,846   | <i>PLCB1</i>      | Gene body                  |
| cg15977864 | 12 | 25,084,721  | <i>BCAT1</i>      | Gene body/1st intron       |
| cg15981484 | 22 | 29,378,073  | <i>ZNRF3</i>      | Gene body/5'UTR/1st intron |
| cg15989208 | 17 | 40,819,882  | <i>N/A</i>        |                            |
| cg15995075 | 3  | 142,451,487 | <i>TRPC1</i>      | Gene body/1st intron       |
| cg15996550 | 2  | 171,742,912 | <i>N/A</i>        |                            |
| cg15999997 | 3  | 3,885,955   | <i>LRRN1</i>      | Gene body/5'UTR/1st intron |
| cg16031250 | 5  | 135,365,012 | <i>TGFBI</i>      | Gene body/1st intron       |
| cg16039657 | 4  | 24,107,545  | <i>PPARGCIA</i>   | Gene body/5'UTR/1st intron |
| cg16046898 | 3  | 155,812,108 | <i>N/A</i>        |                            |
| cg16052267 | 11 | 47,242,087  | <i>DDB2</i>       | Gene body                  |
| cg16061590 | 17 | 36,179,637  | <i>N/A</i>        |                            |



|            |    |             |                     |                            |
|------------|----|-------------|---------------------|----------------------------|
| cg16064037 | 11 | 115,932,982 | <i>N/A</i>          |                            |
| cg16077120 | 11 | 66,947,568  | <i>KDM2A</i>        | Gene body                  |
| cg16082644 | 11 | 59,324,522  | <i>N/A</i>          |                            |
| cg16083503 | 2  | 12,266,549  | <i>MIR3681HG</i>    | Gene body                  |
| cg16106089 | 12 | 24,178,208  | <i>SOX5</i>         | Gene body/5'UTR            |
| cg16107690 | 1  | 216,749,868 | <i>ESRRG</i>        | Gene body                  |
| cg16125894 | 1  | 180,915,357 | <i>N/A</i>          |                            |
| cg16136068 | 10 | 51,589,507  | <i>NCOA4</i>        | Gene body/3'UTR            |
| cg16146501 | 15 | 72,095,296  | <i>N/A</i>          |                            |
| cg16152753 | 10 | 23,732,088  | <i>N/A</i>          |                            |
| cg16170930 | 22 | 26,877,061  | <i>HPS4</i>         | TSS1500                    |
| cg16171771 | 3  | 34,187,750  | <i>N/A</i>          |                            |
| cg16181497 | 6  | 45,409,732  | <i>RUNX2</i>        | Gene body                  |
| cg16189217 | 13 | 101,047,235 | <i>PCCA</i>         | Gene body                  |
| cg16201003 | 12 | 130,952,936 | <i>RIMBP2</i>       | Gene body                  |
| cg16203125 | 15 | 53,079,445  | <i>ONECUT1</i>      | Gene body/1st intron       |
| cg16207110 | 17 | 37,024,401  | <i>N/A</i>          |                            |
| cg16226396 | 7  | 95,424,493  | <i>DYNC111</i>      | Gene body/5'UTR/1st intron |
| cg16231241 | 6  | 33,215,838  | <i>HCG25</i>        | TSS1500                    |
| cg16232126 | 2  | 108,603,005 | <i>SLC5A7</i>       | Gene body/5'UTR/1st exon   |
| cg16235748 | 6  | 149,772,707 | <i>ZC3H12D</i>      | Gene body                  |
| cg16236270 | 7  | 99,697,319  | <i>MCM7</i>         | Gene body/5'UTR            |
| cg16238336 | 3  | 65,465,873  | <i>MAG11</i>        | Gene body                  |
| cg16251054 | 8  | 131,457,058 | <i>ASAP1</i>        | TSS1500                    |
| cg16261489 | 9  | 91,969,068  | <i>SECISBP2</i>     | Gene body                  |
| cg16261737 | 2  | 216,301,490 | <i>FN1</i>          | TSS1500                    |
| cg16264549 | 4  | 8,223,566   | <i>SH3TC1</i>       | Gene body                  |
| cg16276850 | 17 | 38,498,914  | <i>RARA-AS1</i>     | Gene body                  |
| cg16283102 | 2  | 197,940,260 | <i>ANKRD44</i>      | Gene body                  |
| cg16283208 | 11 | 59,323,398  | <i>N/A</i>          |                            |
| cg16285780 | 8  | 30,624,292  | <i>UBXN8</i>        | Gene body/3'UTR            |
| cg16295461 | 4  | 154,058,383 | <i>N/A</i>          |                            |
| cg16295725 | 4  | 10,459,219  | <i>ZNF518B</i>      | TSS200                     |
| cg16300565 | 5  | 32,388,665  | <i>ZFR</i>          | Gene body                  |
| cg16304656 | 7  | 641,337     | <i>LOC101926963</i> | TSS1500                    |
| cg16311163 | 6  | 6,495,300   | <i>LY86-AS1</i>     | Gene body                  |
| cg16317273 | 5  | 38,258,028  | <i>EGFLAM</i>       | TSS1500                    |
| cg16318729 | 17 | 59,302,659  | <i>BCAS3</i>        | Gene body                  |
| cg16321073 | 17 | 74,906,924  | <i>MGAT5B</i>       | Gene body                  |
| cg16326188 | 4  | 87,464,932  | <i>MIR4452</i>      | TSS1500                    |
| cg16338873 | 1  | 202,884,830 | <i>KLHL12</i>       | Gene body                  |
| cg16345171 | 18 | 35,066,382  | <i>CELF4</i>        | TSS1500                    |
| cg16348668 | 2  | 240,196,171 | <i>HDAC4</i>        | Gene body                  |
| cg16349662 | 3  | 186,314,716 | <i>N/A</i>          |                            |
| cg16351998 | 6  | 136,873,379 | <i>MAP7</i>         | TSS1500                    |
| cg16379091 | 11 | 315,751     | <i>N/A</i>          |                            |
| cg16379999 | 14 | 81,976,516  | <i>SEL1L</i>        | Gene body                  |
| cg16415863 | 19 | 17,516,339  | <i>BST2</i>         | Gene body/1st exon         |
| cg16415959 | 16 | 11,783,173  | <i>TXNDC11</i>      | Gene body                  |
| cg16427033 | 10 | 109,023,583 | <i>N/A</i>          |                            |
| cg16441900 | 17 | 750,848     | <i>NXN</i>          | Gene body/1st intron       |
| cg16445727 | 2  | 109,842,911 | <i>SH3RF3</i>       | Gene body/1st intron       |
| cg16449636 | 5  | 73,234,433  | <i>ARHGEF28</i>     | Gene body                  |
| cg16449649 | 3  | 158,290,728 | <i>MLF1</i>         | Gene body/5'UTR/1st intron |
| cg16464422 | 1  | 225,859,329 | <i>N/A</i>          |                            |
| cg16492341 | 10 | 26,856,105  | <i>APBB1IP</i>      | Gene body                  |

|            |    |             |                     |                            |
|------------|----|-------------|---------------------|----------------------------|
| cg16500150 | 4  | 87,825,274  | <i>N/A</i>          |                            |
| cg16500637 | 12 | 56,685,670  | <i>CS</i>           | Gene body/1st intron       |
| cg16519910 | 3  | 128,837,962 | <i>RAB43</i>        | Gene body                  |
| cg16527112 | 7  | 103,301,932 | <i>RELN</i>         | Gene body                  |
| cg16528730 | 8  | 30,437,346  | <i>GTF2E2</i>       | Gene body                  |
| cg16537097 | 7  | 90,149,985  | <i>N/A</i>          |                            |
| cg16561727 | 8  | 97,321,806  | <i>PTDSSI</i>       | Gene body                  |
| cg16566666 | 5  | 70,779,681  | <i>BDP1</i>         | Gene body                  |
| cg16581308 | 4  | 16,862,080  | <i>LDB2</i>         | Gene body/1st intron       |
| cg16591806 | 4  | 124,270,729 | <i>N/A</i>          |                            |
| cg16596496 | 3  | 99,904,397  | <i>TMEM30CP</i>     | TSS1500                    |
| cg16607349 | 5  | 67,539,485  | <i>PIK3R1</i>       | Gene body                  |
| cg16611662 | 21 | 33,736,934  | <i>URB1</i>         | Gene body                  |
| cg16615280 | 6  | 8,507,012   | <i>LOC100506207</i> | Gene body                  |
| cg16617297 | 7  | 130,582,172 | <i>LINC-PINT</i>    | Gene body                  |
| cg16622958 | 16 | 87,397,796  | <i>FBXO31</i>       | Gene body/1st intron       |
| cg16638024 | 7  | 41,652,435  | <i>N/A</i>          |                            |
| cg16648036 | 2  | 11,879,837  | <i>LPIN1</i>        | Gene body/5'UTR/1st intron |
| cg16648665 | 2  | 1,685,498   | <i>PXDN</i>         | Gene body                  |
| cg16652347 | 7  | 132,170,652 | <i>PLXNA4</i>       | Gene body                  |
| cg16660306 | 1  | 20,204,469  | <i>N/A</i>          |                            |
| cg16667421 | 11 | 106,911,576 | <i>N/A</i>          |                            |
| cg16688303 | 5  | 138,211,583 | <i>CTNNA1</i>       | Gene body/5'UTR/1st intron |
| cg16698186 | 8  | 72,836,376  | <i>MSC-ASI</i>      | Gene body/1st intron       |
| cg16703456 | 8  | 42,390,214  | <i>SLC20A2</i>      | Gene body/5'UTR/1st intron |
| cg16732616 | 1  | 50,886,782  | <i>DMRTA2</i>       | Gene body                  |
| cg16748130 | 7  | 100,114,076 | <i>N/A</i>          |                            |
| cg16750777 | 16 | 50,583,441  | <i>NKDI</i>         | Gene body                  |
| cg16758598 | 4  | 106,729,791 | <i>GSTCD</i>        | Gene body                  |
| cg16776967 | 10 | 17,105,309  | <i>CUBN</i>         | Gene body                  |
| cg16779158 | 1  | 23,371,084  | <i>KDM1A</i>        | Gene body                  |
| cg16781205 | 14 | 102,026,543 | <i>DIO3</i>         | TSS1500                    |
| cg16785291 | 7  | 133,974,228 | <i>SLC35B4</i>      | Gene body/3'UTR            |
| cg16799831 | 6  | 7,468,973   | <i>N/A</i>          |                            |
| cg16805846 | 13 | 52,239,080  | <i>WDFY2</i>        | Gene body                  |
| cg16809865 | 8  | 130,160,819 | <i>N/A</i>          |                            |
| cg16819395 | 13 | 102,051,007 | <i>NALCN</i>        | Gene body                  |
| cg16821706 | 2  | 174,986,477 | <i>OLA1</i>         | Gene body                  |
| cg16842634 | 12 | 46,780,880  | <i>LOC100288798</i> | Gene body/1st intron       |
| cg16861079 | 16 | 53,242,619  | <i>CHD9</i>         | Gene body/5'UTR/1st exon   |
| cg16864953 | 6  | 130,186,389 | <i>N/A</i>          |                            |
| cg16869349 | 18 | 35,069,156  | <i>CELF4</i>        | Gene body/1st intron       |
| cg16880773 | 7  | 150,038,666 | <i>RARRES2</i>      | Gene body/5'UTR/1st exon   |
| cg16885779 | 17 | 840,975     | <i>NXN</i>          | Gene body/1st intron       |
| cg16890935 | 4  | 121,742,336 | <i>PRDM5</i>        | Gene body                  |
| cg16904899 | 3  | 13,860,638  | <i>WNT7A</i>        | Gene body                  |
| cg16907093 | 10 | 103,372,983 | <i>FBXW4</i>        | Gene body                  |
| cg16918161 | 4  | 56,458,511  | <i>PDCL2</i>        | TSS200                     |
| cg16935794 | 5  | 71,525,514  | <i>MRPS27</i>       | Gene body                  |
| cg16975587 | 3  | 46,506,206  | <i>LTF</i>          | Gene body/1st intron       |
| cg16985333 | 3  | 169,389,990 | <i>N/A</i>          |                            |
| cg17018082 | 8  | 119,428,220 | <i>SAMD12</i>       | Gene body                  |
| cg17020988 | 5  | 116,412,824 | <i>N/A</i>          |                            |
| cg17031727 | 1  | 230,777,875 | <i>COG2</i>         | TSS1500                    |
| cg17031787 | 6  | 32,049,235  | <i>TNXB</i>         | Gene body                  |
| cg17033047 | 1  | 111,214,851 | <i>KCNA3</i>        | TSS1500                    |

|            |    |             |                     |                          |
|------------|----|-------------|---------------------|--------------------------|
| cg17053285 | 2  | 242,009,588 | <i>SNED1</i>        | Gene body                |
| cg17062665 | 12 | 77,715,621  | <i>N/A</i>          |                          |
| cg17063452 | 10 | 103,450,447 | <i>FBXW4</i>        | Gene body/1st intron     |
| cg17067935 | 17 | 37,033,646  | <i>LASP1</i>        | Gene body/1st intron     |
| cg17093485 | 1  | 149,294,708 | <i>N/A</i>          |                          |
| cg17102269 | 8  | 3,830,691   | <i>CSMD1</i>        | Gene body                |
| cg17102409 | 2  | 12,319,566  | <i>MIR3681HG</i>    | Gene body                |
| cg17131553 | 8  | 116,676,938 | <i>TRPS1</i>        | Gene body/1st intron     |
| cg17141212 | 7  | 99,718,026  | <i>TAF6</i>         | TSS1500                  |
| cg17172331 | 17 | 76,081,215  | <i>TNRC6C</i>       | Gene body                |
| cg17187785 | 11 | 132,107,476 | <i>NTM</i>          | Gene body                |
| cg17191109 | 10 | 126,851,326 | <i>N/A</i>          |                          |
| cg17192862 | 12 | 130,921,663 | <i>RIMBP2</i>       | Gene body                |
| cg17201225 | 7  | 41,778,209  | <i>INHBA-ASI</i>    | Gene body                |
| cg17203352 | 17 | 48,912,487  | <i>WFIKKN2</i>      | TSS200                   |
| cg17210728 | 8  | 10,809,205  | <i>XKR6</i>         | Gene body/1st intron     |
| cg17211514 | 22 | 26,877,092  | <i>HPS4</i>         | TSS1500                  |
| cg17224401 | 3  | 46,149,996  | <i>N/A</i>          |                          |
| cg17243996 | 2  | 230,435,771 | <i>DNER</i>         | Gene body                |
| cg17246140 | 2  | 43,020,264  | <i>HAAO</i>         | TSS1500                  |
| cg17248267 | 2  | 36,815,511  | <i>FEZ2</i>         | Gene body                |
| cg17255500 | 11 | 64,828,199  | <i>N/A</i>          |                          |
| cg17257554 | 2  | 242,004,824 | <i>SNED1</i>        | Gene body                |
| cg17258228 | 6  | 135,376,695 | <i>HBS1L</i>        | TSS1500                  |
| cg17258460 | 21 | 39,087,625  | <i>KCNJ6</i>        | Gene body                |
| cg17264299 | 2  | 239,452,574 | <i>LINC01107</i>    | Gene body                |
| cg17267654 | 6  | 170,411,557 | <i>N/A</i>          |                          |
| cg17270475 | 7  | 80,642,464  | <i>N/A</i>          |                          |
| cg17276853 | 17 | 32,964,596  | <i>TMEM132E</i>     | Gene body                |
| cg17284168 | 6  | 134,491,531 | <i>SGK1</i>         | Gene body                |
| cg17299818 | 8  | 16,959,809  | <i>MICU3</i>        | Gene body                |
| cg17308468 | 11 | 35,201,701  | <i>CD44</i>         | Gene body                |
| cg17310995 | 15 | 60,735,293  | <i>ICE2</i>         | Gene body                |
| cg17320738 | 8  | 32,726,179  | <i>N/A</i>          |                          |
| cg17352276 | 15 | 66,795,208  | <i>SNORD16</i>      | Gene body/1st exon       |
| cg17375197 | 7  | 7,593,357   | <i>LOC101927391</i> | Gene body                |
| cg17380533 | 8  | 72,875,102  | <i>MSC-ASI</i>      | Gene body/1st intron     |
| cg17384124 | 2  | 197,940,256 | <i>ANKRD44</i>      | Gene body                |
| cg17400812 | 7  | 41,854,825  | <i>N/A</i>          |                          |
| cg17404749 | 4  | 186,202,012 | <i>SNX25</i>        | Gene body                |
| cg17404942 | 6  | 106,640,857 | <i>ATG5</i>         | Gene body                |
| cg17418948 | 14 | 34,250,768  | <i>NPAS3</i>        | Gene body                |
| cg17419788 | 3  | 47,466,280  | <i>SCAP</i>         | Gene body                |
| cg17422120 | 12 | 2,103,365   | <i>DCP1B</i>        | Gene body                |
| cg17437960 | 16 | 58,672,446  | <i>N/A</i>          |                          |
| cg17455155 | 1  | 3,056,679   | <i>PRDM16</i>       | Gene body/1st intron     |
| cg17457545 | 15 | 62,404,382  | <i>N/A</i>          |                          |
| cg17465410 | 1  | 160,079,577 | <i>N/A</i>          |                          |
| cg17470882 | 6  | 15,463,247  | <i>JARID2</i>       | Gene body/5'UTR          |
| cg17479943 | 1  | 119,546,928 | <i>N/A</i>          |                          |
| cg17487719 | 2  | 239,628,789 | <i>N/A</i>          |                          |
| cg17491365 | 5  | 109,962,391 | <i>TMEM232</i>      | Gene body                |
| cg17497608 | 7  | 90,896,701  | <i>FZD1</i>         | Gene body/1st exon/3'UTR |
| cg17525428 | 19 | 51,197,463  | <i>SHANK1</i>       | Gene body                |
| cg17527798 | 3  | 46,506,404  | <i>LTF</i>          | Gene body/5'UTR/1st exon |
| cg17535895 | 20 | 56,719,651  | <i>N/A</i>          |                          |

|            |    |             |                     |                            |
|------------|----|-------------|---------------------|----------------------------|
| cg17546649 | 3  | 44,802,566  | <i>KIAA1143</i>     | Gene body/1st intron       |
| cg17552088 | 6  | 38,087,605  | <i>ZFAND3</i>       | Gene body                  |
| cg17552357 | 17 | 76,932,332  | <i>N/A</i>          |                            |
| cg17566002 | 5  | 7,080,810   | <i>N/A</i>          |                            |
| cg17585755 | 6  | 24,332,851  | <i>DCDC2</i>        | Gene body                  |
| cg17592008 | 20 | 52,784,516  | <i>CYP24A1</i>      | Gene body                  |
| cg17596058 | 1  | 15,242,180  | <i>KAZN</i>         | Gene body/1st intron       |
| cg17600231 | 13 | 45,008,526  | <i>TSC22D1</i>      | Gene body/3'UTR            |
| cg17603537 | 10 | 1,195,916   | <i>N/A</i>          |                            |
| cg17606996 | 2  | 171,572,472 | <i>SP5</i>          | Gene body/1st intron       |
| cg17632243 | 5  | 107,588,695 | <i>FBXL17</i>       | Gene body                  |
| cg17642685 | 17 | 63,554,803  | <i>AXIN2</i>        | Gene body/5'UTR            |
| cg17646117 | 13 | 99,431,210  | <i>N/A</i>          |                            |
| cg17655451 | 5  | 53,959,665  | <i>LOC102467080</i> | Gene body                  |
| cg17668846 | 5  | 116,365,501 | <i>N/A</i>          |                            |
| cg17680823 | 2  | 240,016,541 | <i>HDAC4</i>        | Gene body                  |
| cg17685017 | 2  | 241,981,188 | <i>SNED1</i>        | Gene body                  |
| cg17706612 | 15 | 26,282,839  | <i>LINC02346</i>    | Gene body                  |
| cg17707776 | 13 | 33,727,849  | <i>STARD13</i>      | Gene body                  |
| cg17709391 | 13 | 101,480,751 | <i>NALCN-ASI</i>    | Gene body                  |
| cg17725627 | 1  | 17,305,262  | <i>MFAP2</i>        | Gene body/5'UTR/1st intron |
| cg17744279 | 8  | 20,113,173  | <i>LZTS1</i>        | TSS1500                    |
| cg17749509 | 1  | 110,934,279 | <i>SLC16A4</i>      | TSS1500                    |
| cg17750096 | 5  | 138,211,435 | <i>CTNNA1</i>       | Gene body/5'UTR/1st intron |
| cg17751646 | 2  | 170,789,876 | <i>UBR3</i>         | Gene body                  |
| cg17752132 | 4  | 16,821,652  | <i>LDB2</i>         | Gene body/1st intron       |
| cg17752395 | 3  | 118,688,312 | <i>IGSF11</i>       | Gene body/1st intron       |
| cg17777186 | 12 | 131,135,979 | <i>RIMBP2</i>       | Gene body/5'UTR/1st intron |
| cg17806162 | 1  | 2,472,133   | <i>N/A</i>          |                            |
| cg17807424 | 1  | 171,591,293 | <i>N/A</i>          |                            |
| cg17810126 | 17 | 35,183,053  | <i>N/A</i>          |                            |
| cg17814977 | 4  | 16,961,695  | <i>N/A</i>          |                            |
| cg17832313 | 14 | 56,845,323  | <i>N/A</i>          |                            |
| cg17838745 | 12 | 28,054,299  | <i>N/A</i>          |                            |
| cg17856663 | 11 | 31,677,209  | <i>ELP4</i>         | Gene body                  |
| cg17885536 | 7  | 39,699,171  | <i>RALA</i>         | Gene body/5'UTR/1st intron |
| cg17890928 | 17 | 48,546,193  | <i>CHAD</i>         | Gene body/5'UTR/1st exon   |
| cg17897547 | 3  | 188,850,150 | <i>N/A</i>          |                            |
| cg17921464 | 12 | 58,132,114  | <i>AGAP2</i>        | TSS200                     |
| cg17931655 | 4  | 84,519,302  | <i>GPAT3</i>        | Gene body                  |
| cg17946266 | 6  | 12,747,208  | <i>PHACTR1</i>      | Gene body/1st intron       |
| cg17964888 | 14 | 68,622,944  | <i>RAD51B</i>       | Gene body                  |
| cg17973439 | 2  | 112,688,481 | <i>MERTK</i>        | Gene body                  |
| cg17979827 | 14 | 34,162,679  | <i>NPAS3</i>        | Gene body                  |
| cg18009484 | 11 | 131,630,593 | <i>NTM</i>          | Gene body/1st intron       |
| cg18011404 | 3  | 112,274,881 | <i>ATG3</i>         | Gene body                  |
| cg18031663 | 12 | 77,456,902  | <i>E2F7</i>         | Gene body                  |
| cg18045701 | 4  | 16,728,682  | <i>LDB2</i>         | Gene body                  |
| cg18049228 | 4  | 58,411,476  | <i>N/A</i>          |                            |
| cg18053164 | 6  | 157,806,829 | <i>ZDHHC14</i>      | Gene body/1st intron       |
| cg18085517 | 15 | 31,394,285  | <i>TRPM1</i>        | TSS1500                    |
| cg18090646 | 2  | 7,575,450   | <i>LOC100506274</i> | Gene body                  |
| cg18091264 | 15 | 66,795,595  | <i>SNORD18A</i>     | Gene body/1st exon         |
| cg18104680 | 10 | 73,460,737  | <i>CDH23</i>        | Gene body                  |
| cg18108786 | 1  | 118,847,561 | <i>N/A</i>          |                            |
| cg18111266 | 3  | 168,840,564 | <i>MECOM</i>        | Gene body                  |

|            |    |             |                     |                            |
|------------|----|-------------|---------------------|----------------------------|
| cg18147098 | 1  | 212,688,916 | <i>N/A</i>          |                            |
| cg18147162 | 8  | 124,038,163 | <i>DERL1</i>        | Gene body                  |
| cg18157642 | 8  | 104,992,636 | <i>RIMS2</i>        | Gene body                  |
| cg18160090 | 6  | 153,445,070 | <i>RGS17</i>        | Gene body/5'UTR/1st intron |
| cg18165550 | 15 | 97,954,410  | <i>LINC02254</i>    | Gene body                  |
| cg18178870 | 20 | 53,250,604  | <i>DOK5</i>         | Gene body                  |
| cg18201034 | 11 | 7,698,649   | <i>N/A</i>          |                            |
| cg18202080 | 2  | 232,765,247 | <i>N/A</i>          |                            |
| cg18209323 | 7  | 92,672,878  | <i>N/A</i>          |                            |
| cg18244817 | 5  | 42,949,610  | <i>N/A</i>          |                            |
| cg18254356 | 5  | 43,044,573  | <i>LOC153684</i>    | Gene body                  |
| cg18261431 | 6  | 130,165,025 | <i>TMEM244</i>      | Gene body                  |
| cg18270378 | 7  | 3,284,394   | <i>N/A</i>          |                            |
| cg18276556 | 6  | 129,681,176 | <i>LAMA2</i>        | Gene body                  |
| cg18311708 | 7  | 149,322,908 | <i>ZNF767P</i>      | TSS1500                    |
| cg18313762 | 1  | 17,305,365  | <i>MFAP2</i>        | Gene body/5'UTR/1st intron |
| cg18319250 | 6  | 3,798,040   | <i>N/A</i>          |                            |
| cg18321037 | 6  | 29,829,450  | <i>N/A</i>          |                            |
| cg18331412 | 5  | 135,364,986 | <i>TGFBI</i>        | Gene body/1st intron       |
| cg18337525 | 6  | 45,387,854  | <i>RUNX2</i>        | Gene body                  |
| cg18346634 | 1  | 29,190,137  | <i>OPRD1</i>        | Gene body/3'UTR            |
| cg18350885 | 4  | 158,623,024 | <i>N/A</i>          |                            |
| cg18353405 | 7  | 148,764,182 | <i>N/A</i>          |                            |
| cg18359088 | 8  | 141,199,506 | <i>TRAPPC9</i>      | Gene body                  |
| cg18360734 | 17 | 8,288,033   | <i>RPL26</i>        | TSS1500                    |
| cg18365960 | 10 | 118,643,262 | <i>SHTN1</i>        | Gene body/3'UTR            |
| cg18368658 | 15 | 40,785,717  | <i>N/A</i>          |                            |
| cg18368820 | 7  | 150,497,367 | <i>TMEM176B</i>     | Gene body/5'UTR/1st intron |
| cg18376497 | 4  | 143,488,622 | <i>INPP4B</i>       | Gene body/5'UTR            |
| cg18378811 | 4  | 114,900,050 | <i>ARSL</i>         | Gene body/5'UTR/1st exon   |
| cg18403852 | 21 | 44,016,328  | <i>N/A</i>          |                            |
| cg18405580 | 7  | 103,629,099 | <i>RELN</i>         | Gene body/1st intron       |
| cg18410110 | 5  | 31,963,583  | <i>PDZD2</i>        | Gene body                  |
| cg18417313 | 7  | 41,910,163  | <i>N/A</i>          |                            |
| cg18419276 | 2  | 96,971,862  | <i>SNRNP200</i>     | TSS1500                    |
| cg18432895 | 8  | 29,205,555  | <i>DUSP4</i>        | Gene body/5'UTR/1st exon   |
| cg18442168 | 12 | 81,657,499  | <i>PPFIA2</i>       | Gene body                  |
| cg18451484 | 12 | 112,760,326 | <i>HECTD4</i>       | Gene body/5'UTR/1st intron |
| cg18458183 | 5  | 78,851,744  | <i>N/A</i>          |                            |
| cg18466674 | 6  | 31,783,545  | <i>HSPA1A</i>       | Gene body/1st exon         |
| cg18481049 | 10 | 115,479,248 | <i>CASP7</i>        | Gene body/1st intron       |
| cg18495102 | 4  | 101,663,353 | <i>N/A</i>          |                            |
| cg18495141 | 15 | 60,735,223  | <i>ICE2</i>         | Gene body                  |
| cg18498096 | 13 | 101,213,081 | <i>GGACT</i>        | Gene body/5'UTR            |
| cg18520238 | 11 | 36,422,557  | <i>PRR5L</i>        | Gene body/5'UTR/1st exon   |
| cg18538954 | 16 | 56,511,477  | <i>N/A</i>          |                            |
| cg18541105 | 16 | 79,741,465  | <i>N/A</i>          |                            |
| cg18557047 | 4  | 106,106,175 | <i>TET2</i>         | Gene body/5'UTR/1st intron |
| cg18557556 | 12 | 75,905,681  | <i>KRR1</i>         | TSS1500                    |
| cg18576374 | 17 | 78,549,371  | <i>RPTOR</i>        | Gene body/1st intron       |
| cg18577239 | 12 | 53,955,664  | <i>ATF7</i>         | Gene body                  |
| cg18587484 | 6  | 43,449,436  | <i>TJAP1</i>        | Gene body/5'UTR            |
| cg18607411 | 13 | 80,911,808  | <i>SPRY2</i>        | Gene body                  |
| cg18618113 | 3  | 69,856,177  | <i>MITF</i>         | Gene body/1st intron       |
| cg18639238 | 2  | 1,625,185   | <i>N/A</i>          |                            |
| cg18646441 | 7  | 103,126,723 | <i>LOC101927870</i> | Gene body                  |

|            |    |             |                     |                            |
|------------|----|-------------|---------------------|----------------------------|
| cg18648125 | 7  | 115,573,765 | <i>N/A</i>          |                            |
| cg18666944 | 6  | 16,737,421  | <i>ATXN1</i>        | Gene body/5'UTR            |
| cg18668511 | 5  | 140,557,227 | <i>PCDHB8</i>       | TSS200                     |
| cg18675847 | 4  | 87,865,779  | <i>AFF1</i>         | Gene body/5'UTR/1st intron |
| cg18683604 | 14 | 51,561,293  | <i>TRIM9</i>        | Gene body/1st exon         |
| cg18686168 | 3  | 72,729,064  | <i>N/A</i>          |                            |
| cg18690922 | 3  | 98,429,487  | <i>N/A</i>          |                            |
| cg18701685 | 14 | 23,624,363  | <i>SLC7A8</i>       | Gene body/1st intron       |
| cg18706316 | 13 | 101,978,015 | <i>NALCN</i>        | Gene body                  |
| cg18712199 | 14 | 29,240,691  | <i>LINC01551</i>    | TSS1500                    |
| cg18725573 | 20 | 62,368,956  | <i>LIME1</i>        | Gene body                  |
| cg18726327 | 10 | 28,283,985  | <i>ARMC4</i>        | Gene body                  |
| cg18735473 | 18 | 35,015,946  | <i>CELF4</i>        | Gene body/5'UTR            |
| cg18745629 | 3  | 57,163,527  | <i>IL17RD</i>       | Gene body/1st intron       |
| cg18748888 | 17 | 76,102,450  | <i>TNRC6C</i>       | Gene body/3'UTR            |
| cg18753541 | 4  | 121,841,743 | <i>PRDM5</i>        | Gene body/1st intron       |
| cg18757087 | 5  | 173,317,332 | <i>CPEB4</i>        | Gene body/1st exon         |
| cg18760461 | 6  | 90,275,259  | <i>ANKRD6</i>       | TSS1500                    |
| cg18763536 | 12 | 11,812,062  | <i>ETV6</i>         | Gene body/1st intron       |
| cg18763712 | 2  | 74,829,898  | <i>MIAP</i>         | Gene body                  |
| cg18764015 | 2  | 214,148,856 | <i>LOC100130451</i> | Gene body/1st exon         |
| cg18768463 | 2  | 80,471,170  | <i>CTNNA2</i>       | Gene body                  |
| cg18773641 | 7  | 40,293,247  | <i>SUGCT</i>        | Gene body                  |
| cg18784831 | 20 | 56,205,357  | <i>N/A</i>          |                            |
| cg18786623 | 6  | 29,894,050  | <i>HCG4B</i>        | Gene body/1st exon         |
| cg18798922 | 2  | 171,572,863 | <i>SP5</i>          | Gene body                  |
| cg18804615 | 14 | 102,027,760 | <i>DIO3</i>         | Gene body/5'UTR/1st exon   |
| cg18807895 | 5  | 110,427,112 | <i>WDR36</i>        | TSS1500                    |
| cg18821122 | 2  | 66,916,737  | <i>LINC01798</i>    | Gene body                  |
| cg18834729 | 12 | 117,798,135 | <i>NOS1</i>         | Gene body/5'UTR/1st intron |
| cg18865112 | 1  | 849,540     | <i>N/A</i>          |                            |
| cg18871494 | 11 | 18,672,602  | <i>N/A</i>          |                            |
| cg18874265 | 2  | 12,411,599  | <i>MIR3681HG</i>    | Gene body                  |
| cg18896948 | 15 | 35,965,389  | <i>DPH6-AS1</i>     | Gene body/1st intron       |
| cg18922212 | 18 | 3,493,953   | <i>N/A</i>          |                            |
| cg18932687 | 10 | 129,986,003 | <i>N/A</i>          |                            |
| cg18947951 | 2  | 63,285,739  | <i>N/A</i>          |                            |
| cg18949259 | 12 | 93,503,799  | <i>LOC643339</i>    | Gene body                  |
| cg18975130 | 8  | 94,238,749  | <i>N/A</i>          |                            |
| cg18976212 | 2  | 53,868,889  | <i>N/A</i>          |                            |
| cg18995275 | 15 | 89,659,639  | <i>ABHD2</i>        | Gene body                  |
| cg19010136 | 1  | 159,220,259 | <i>N/A</i>          |                            |
| cg19044242 | 12 | 68,845,935  | <i>LINC02384</i>    | TSS1500                    |
| cg19046826 | 17 | 48,546,297  | <i>CHAD</i>         | TSS200                     |
| cg19066932 | 6  | 136,356,611 | <i>PDE7B</i>        | Gene body                  |
| cg19075225 | 2  | 242,009,513 | <i>SNED1</i>        | Gene body                  |
| cg19075333 | 18 | 9,454,527   | <i>N/A</i>          |                            |
| cg19125901 | 7  | 93,866,568  | <i>N/A</i>          |                            |
| cg19163939 | 7  | 944,607     | <i>ADAPI</i>        | Gene body                  |
| cg19166896 | 15 | 92,410,356  | <i>SLCO3A1</i>      | Gene body/1st intron       |
| cg19177777 | 19 | 40,175,038  | <i>LGALS17A</i>     | Gene body                  |
| cg19181690 | 17 | 63,694,512  | <i>CEP112</i>       | Gene body                  |
| cg19188997 | 2  | 191,979,239 | <i>STAT4</i>        | Gene body                  |
| cg19192280 | 6  | 32,116,893  | <i>PRRT1</i>        | Gene body/3'UTR            |
| cg19195069 | 3  | 187,607,568 | <i>N/A</i>          |                            |
| cg19205240 | 7  | 103,126,837 | <i>LOC101927870</i> | Gene body                  |

|            |    |             |                       |                            |
|------------|----|-------------|-----------------------|----------------------------|
| cg19209689 | 18 | 35,064,900  | <i>CELF4</i>          | Gene body/5'UTR            |
| cg19213633 | 7  | 13,989,896  | <i>ETV1</i>           | Gene body/1st intron       |
| cg19228034 | 7  | 92,672,812  | <i>N/A</i>            |                            |
| cg19238058 | 1  | 239,551,177 | <i>CHRM3</i>          | Gene body/5'UTR/1st intron |
| cg19256813 | 12 | 117,627,286 | <i>FBXO21</i>         | Gene body/1st intron       |
| cg19272348 | 17 | 1,521,405   | <i>SLC43A2</i>        | Gene body                  |
| cg19287349 | 15 | 63,358,260  | <i>TPM1</i>           | Gene body                  |
| cg19299499 | 10 | 64,996,091  | <i>JMJD1C</i>         | Gene body/5'UTR            |
| cg19307112 | 16 | 71,576,484  | <i>N/A</i>            |                            |
| cg19315472 | 1  | 42,122,171  | <i>HIVEP3</i>         | Gene body/5'UTR            |
| cg19325152 | 2  | 9,527,430   | <i>ASAP2</i>          | Gene body                  |
| cg19325791 | 17 | 46,560,683  | <i>N/A</i>            |                            |
| cg19331466 | 2  | 9,527,051   | <i>ASAP2</i>          | Gene body                  |
| cg19336815 | 17 | 48,297,434  | <i>N/A</i>            |                            |
| cg19336959 | 7  | 150,497,703 | <i>TMEM176B</i>       | TSS200                     |
| cg19338056 | 9  | 14,992,172  | <i>LOC389705</i>      | TSS1500                    |
| cg19351398 | 7  | 149,472,134 | <i>SSPO</i>           | TSS1500                    |
| cg19365643 | 11 | 62,491,908  | <i>HNRNPUL2-BSCL2</i> | Gene body/1st intron       |
| cg19378892 | 1  | 159,283,536 | <i>OR10J3</i>         | Gene body/1st exon         |
| cg19394039 | 6  | 15,901,433  | <i>N/A</i>            |                            |
| cg19400316 | 1  | 8,815,225   | <i>RERE</i>           | Gene body/5'UTR            |
| cg19414383 | 1  | 17,528,238  | <i>N/A</i>            |                            |
| cg19419291 | 5  | 95,295,965  | <i>ELL2</i>           | Gene body/1st intron       |
| cg19419926 | 7  | 39,121,830  | <i>POU6F2</i>         | Gene body                  |
| cg19438746 | 4  | 174,191,964 | <i>GALNT7</i>         | Gene body                  |
| cg19442241 | 2  | 207,314,881 | <i>ADAM23</i>         | Gene body                  |
| cg19491111 | 20 | 5,741,690   | <i>C20orf196</i>      | Gene body/5'UTR/1st intron |
| cg19506849 | 10 | 114,767,609 | <i>TCF7L2</i>         | Gene body                  |
| cg19517718 | 2  | 1,747,082   | <i>PXDN</i>           | Gene body/1st intron       |
| cg19542542 | 4  | 41,157,025  | <i>APBB2</i>          | Gene body/5'UTR/1st intron |
| cg19556284 | 6  | 158,909,455 | <i>TULP4</i>          | Gene body                  |
| cg19564884 | 17 | 8,193,298   | <i>RANGRF</i>         | Gene body/3'UTR            |
| cg19571285 | 1  | 58,498,282  | <i>DAB1</i>           | Gene body/5'UTR/1st intron |
| cg19576362 | 16 | 67,589,726  | <i>N/A</i>            |                            |
| cg19576556 | 17 | 80,024,177  | <i>DUSIL</i>          | TSS1500                    |
| cg19579183 | 11 | 59,324,467  | <i>N/A</i>            |                            |
| cg19591183 | 2  | 86,439,059  | <i>MRPL35</i>         | Gene body                  |
| cg19597227 | 19 | 41,119,286  | <i>LTBP4</i>          | Gene body                  |
| cg19619576 | 17 | 17,718,525  | <i>MIR33B</i>         | TSS1500                    |
| cg19624849 | 1  | 145,415,412 | <i>HFE2</i>           | Gene body/5'UTR            |
| cg19626253 | 1  | 15,062,529  | <i>KAZN</i>           | Gene body/1st intron       |
| cg19629201 | 5  | 43,389,814  | <i>CCL28</i>          | Gene body/5'UTR/1st intron |
| cg19635628 | 8  | 21,313,850  | <i>N/A</i>            |                            |
| cg19659619 | 10 | 104,060,512 | <i>GBF1</i>           | Gene body                  |
| cg19664013 | 6  | 28,757,366  | <i>N/A</i>            |                            |
| cg19665696 | 7  | 949,154     | <i>ADAP1</i>          | Gene body                  |
| cg19685066 | 1  | 18,082,003  | <i>ACTL8</i>          | Gene body/5'UTR/1st intron |
| cg19696343 | 6  | 105,526,588 | <i>LIN28B</i>         | Gene body                  |
| cg19708702 | 7  | 40,349,969  | <i>SUGCT</i>          | Gene body                  |
| cg19719207 | 4  | 121,839,493 | <i>PRDM5</i>          | Gene body/1st intron       |
| cg19743153 | 11 | 124,021,494 | <i>N/A</i>            |                            |
| cg19797516 | 10 | 26,856,454  | <i>APBB1IP</i>        | Gene body/3'UTR            |
| cg19814934 | 5  | 42,950,152  | <i>N/A</i>            |                            |
| cg19831369 | 22 | 26,881,026  | <i>SRRD</i>           | Gene body/1st intron       |
| cg19835973 | 19 | 54,746,613  | <i>LILRA6</i>         | TSS200                     |
| cg19853833 | 18 | 35,146,668  | <i>CELF4</i>          | TSS1500                    |

|            |    |             |                     |                            |
|------------|----|-------------|---------------------|----------------------------|
| cg19856981 | 7  | 103,321,281 | <i>RELN</i>         | Gene body                  |
| cg19865002 | 6  | 18,395,321  | <i>RNF144B</i>      | Gene body/5'UTR/1st intron |
| cg19877430 | 10 | 100,424,450 | <i>HPSE2</i>        | Gene body                  |
| cg19897964 | 20 | 56,416,164  | <i>N/A</i>          |                            |
| cg19905109 | 20 | 57,892,254  | <i>EDN3</i>         | Gene body                  |
| cg19932250 | 20 | 13,221,792  | <i>ISM1-AS1</i>     | TSS1500                    |
| cg19940312 | 4  | 20,257,590  | <i>SLIT2</i>        | Gene body/1st intron       |
| cg19949591 | 17 | 63,549,322  | <i>AXIN2</i>        | Gene body                  |
| cg19960420 | 10 | 101,282,185 | <i>N/A</i>          |                            |
| cg19961043 | 17 | 48,546,431  | <i>CHAD</i>         | TSS1500                    |
| cg19965042 | 15 | 49,101,851  | <i>CEP152</i>       | Gene body/5'UTR/1st intron |
| cg19972686 | 1  | 43,638,987  | <i>EBNA1BP2</i>     | TSS1500                    |
| cg19981243 | 3  | 114,478,256 | <i>ZBTB20</i>       | TSS200                     |
| cg19987768 | 17 | 750,306     | <i>NXN</i>          | Gene body/1st intron       |
| cg19988426 | 10 | 130,064,021 | <i>N/A</i>          |                            |
| cg20002209 | 16 | 3,004,363   | <i>N/A</i>          |                            |
| cg20003179 | 1  | 159,175,295 | <i>ACKR1</i>        | Gene body/1st exon         |
| cg20018022 | 17 | 35,851,415  | <i>DUSP14</i>       | Gene body/5'UTR/1st intron |
| cg20035319 | 17 | 76,102,438  | <i>TNRC6C</i>       | Gene body/3'UTR            |
| cg20047612 | 7  | 40,832,276  | <i>SUGCT</i>        | Gene body                  |
| cg20053110 | 6  | 37,617,864  | <i>MDGA1</i>        | Gene body                  |
| cg20055548 | 7  | 134,571,494 | <i>CALD1</i>        | Gene body                  |
| cg20066282 | 15 | 43,595,940  | <i>TGM7</i>         | TSS1500                    |
| cg20066782 | 7  | 102,574,504 | <i>LRRC17</i>       | Gene body                  |
| cg20076442 | 8  | 72,745,197  | <i>N/A</i>          |                            |
| cg20077343 | 11 | 1,036,307   | <i>MUC6</i>         | Gene body/1st intron       |
| cg20079992 | 19 | 51,192,728  | <i>SHANK1</i>       | Gene body                  |
| cg20100445 | 10 | 134,756,707 | <i>CFAP46</i>       | TSS1500                    |
| cg20125971 | 4  | 56,458,333  | <i>PDCL2</i>        | Gene body/5'UTR/1st exon   |
| cg20141578 | 12 | 12,225,262  | <i>BCL2L14</i>      | Gene body/5'UTR/1st intron |
| cg20161471 | 2  | 234,891,119 | <i>TRPM8</i>        | Gene body                  |
| cg20169521 | 2  | 202,563,587 | <i>MPP4</i>         | TSS200                     |
| cg20178107 | 7  | 41,914,145  | <i>N/A</i>          |                            |
| cg20196537 | 2  | 171,574,548 | <i>LOC101926913</i> | Gene body                  |
| cg20214871 | 17 | 77,478,637  | <i>RBFOX3</i>       | Gene body/5'UTR/1st exon   |
| cg20256216 | 7  | 98,927,457  | <i>ARPC1A</i>       | Gene body/5'UTR/1st intron |
| cg20262857 | 8  | 81,718,227  | <i>ZNF704</i>       | Gene body                  |
| cg20268815 | 14 | 34,116,676  | <i>NPAS3</i>        | Gene body                  |
| cg20280553 | 11 | 61,366,940  | <i>LOC101927495</i> | Gene body                  |
| cg20286956 | 1  | 39,547,918  | <i>N/A</i>          |                            |
| cg20291796 | 7  | 150,728,263 | <i>ABCB8</i>        | Gene body/1st intron       |
| cg20323072 | 22 | 34,270,444  | <i>LARGE1</i>       | Gene body/5'UTR/1st intron |
| cg20332195 | 4  | 10,459,929  | <i>ZNF518B</i>      | TSS1500                    |
| cg20340720 | 10 | 104,512,523 | <i>WBP1L</i>        | Gene body/1st intron       |
| cg20393908 | 1  | 149,958,467 | <i>OTUD7B</i>       | Gene body/5'UTR/1st intron |
| cg20402284 | 5  | 493,448     | <i>SLC9A3</i>       | Gene body/1st intron       |
| cg20408002 | 20 | 10,838,068  | <i>N/A</i>          |                            |
| cg20408776 | 17 | 43,319,382  | <i>FMNL1</i>        | Gene body                  |
| cg20422160 | 6  | 12,729,828  | <i>PHACTR1</i>      | Gene body/1st intron       |
| cg20438207 | 3  | 3,886,242   | <i>LRRN1</i>        | Gene body/5'UTR            |
| cg20460166 | 1  | 54,423,202  | <i>LRRC42</i>       | Gene body                  |
| cg20460986 | 15 | 62,267,098  | <i>VPS13C</i>       | Gene body                  |
| cg20475322 | 11 | 121,971,232 | <i>MIR100HG</i>     | Gene body/1st exon         |
| cg20480274 | 17 | 27,313,125  | <i>SEZ6</i>         | Gene body/1st intron       |
| cg20502234 | 10 | 105,154,943 | <i>MIR1307</i>      | TSS1500                    |
| cg20513582 | 7  | 41,869,362  | <i>N/A</i>          |                            |



|            |    |             |                     |                            |
|------------|----|-------------|---------------------|----------------------------|
| cg20517806 | 15 | 93,430,216  | <i>LINC01578</i>    | Gene body                  |
| cg20520804 | 10 | 3,149,673   | <i>PFKP</i>         | Gene body                  |
| cg20523147 | 8  | 22,471,776  | <i>CCAR2</i>        | Gene body                  |
| cg20559215 | 6  | 36,076,933  | <i>MAPK14</i>       | Gene body/3'UTR            |
| cg20563911 | 18 | 21,128,055  | <i>NPC1</i>         | Gene body                  |
| cg20564330 | 1  | 47,152,369  | <i>EFCAB14-AS1</i>  | Gene body                  |
| cg20566934 | 3  | 143,993,048 | <i>N/A</i>          |                            |
| cg20567570 | 8  | 98,992,580  | <i>MATN2</i>        | Gene body                  |
| cg20587808 | 3  | 184,320,123 | <i>N/A</i>          |                            |
| cg20608966 | 18 | 74,113,813  | <i>ZNF516</i>       | Gene body                  |
| cg20617256 | 5  | 57,753,051  | <i>PLK2</i>         | Gene body                  |
| cg20671059 | 20 | 57,875,735  | <i>EDN3</i>         | Gene body/5'UTR/1st exon   |
| cg20678604 | 17 | 59,396,204  | <i>BCAS3</i>        | Gene body                  |
| cg20695627 | 2  | 48,573,478  | <i>FOXP2</i>        | Gene body                  |
| cg20709373 | 7  | 128,322,280 | <i>FAM71F2</i>      | Gene body                  |
| cg20725245 | 17 | 48,297,235  | <i>N/A</i>          |                            |
| cg20726993 | 3  | 107,565,406 | <i>LINC00635</i>    | Gene body                  |
| cg20748533 | 19 | 51,189,975  | <i>SHANK1</i>       | Gene body                  |
| cg20785560 | 1  | 78,511,235  | <i>GIPC2</i>        | TSS1500                    |
| cg20792436 | 17 | 79,972,570  | <i>ASPSCR1</i>      | Gene body                  |
| cg20802407 | 7  | 95,496,933  | <i>DYNCH1</i>       | Gene body                  |
| cg20806928 | 5  | 135,288,873 | <i>LECT2</i>        | Gene body/1st intron       |
| cg20821566 | 17 | 81,014,667  | <i>N/A</i>          |                            |
| cg20837403 | 5  | 6,328,447   | <i>LINC02145</i>    | Gene body/1st intron       |
| cg20852788 | 4  | 119,676,722 | <i>SEC24D</i>       | Gene body                  |
| cg20855242 | 2  | 32,390,099  | <i>SLC30A6</i>      | TSS1500                    |
| cg20859037 | 8  | 38,796,989  | <i>PLEKHA2</i>      | Gene body                  |
| cg20889395 | 17 | 48,912,556  | <i>WFIKN2</i>       | TSS200                     |
| cg20923661 | 12 | 76,379,144  | <i>N/A</i>          |                            |
| cg20924082 | 7  | 40,546,851  | <i>SUGCT</i>        | Gene body                  |
| cg20925383 | 13 | 50,702,410  | <i>DLEU1</i>        | Gene body                  |
| cg20926939 | 4  | 17,030,288  | <i>N/A</i>          |                            |
| cg20927731 | 15 | 74,726,561  | <i>SEMA7A</i>       | TSS1500                    |
| cg20939622 | 5  | 89,814,943  | <i>LYSMD3</i>       | Gene body/3'UTR            |
| cg20939663 | 3  | 118,352,445 | <i>LOC105374060</i> | Gene body                  |
| cg20947259 | 1  | 201,572,159 | <i>N/A</i>          |                            |
| cg20956520 | 12 | 88,242,651  | <i>N/A</i>          |                            |
| cg20956815 | 3  | 184,320,006 | <i>N/A</i>          |                            |
| cg21024942 | 17 | 49,265,825  | <i>MBTD1</i>        | Gene body                  |
| cg21040094 | 17 | 78,475,995  | <i>N/A</i>          |                            |
| cg21043558 | 7  | 140,625,365 | <i>BRAF</i>         | TSS1500                    |
| cg21051791 | 6  | 137,355,264 | <i>IL20RA</i>       | Gene body/5'UTR/1st intron |
| cg21052608 | 5  | 81,652,962  | <i>N/A</i>          |                            |
| cg21052932 | 14 | 51,342,320  | <i>ABHD12B</i>      | Gene body/5'UTR/1st intron |
| cg21055126 | 3  | 46,506,653  | <i>LTF</i>          | Gene body/5'UTR/1st exon   |
| cg21056220 | 10 | 77,871,664  | <i>LRMDA</i>        | Gene body                  |
| cg21078322 | 6  | 134,491,163 | <i>SGK1</i>         | Gene body/3'UTR            |
| cg21104276 | 7  | 90,896,572  | <i>FZD1</i>         | Gene body/1st exon/3'UTR   |
| cg21110337 | 12 | 113,671,028 | <i>TPCNI</i>        | Gene body                  |
| cg21121883 | 12 | 94,812,258  | <i>CEP83</i>        | Gene body/5'UTR/1st intron |
| cg21126403 | 3  | 114,343,227 | <i>ZBTB20</i>       | TSS200                     |
| cg21138455 | 4  | 14,135,882  | <i>LINC01085</i>    | Gene body                  |
| cg21144797 | 17 | 31,098,630  | <i>MYO1D</i>        | Gene body                  |
| cg21145205 | 10 | 85,773,016  | <i>N/A</i>          |                            |
| cg21145248 | 5  | 176,816,679 | <i>SLC34A1</i>      | Gene body                  |
| cg21150026 | 2  | 207,904,284 | <i>N/A</i>          |                            |

|            |    |             |                     |                            |
|------------|----|-------------|---------------------|----------------------------|
| cg21158745 | 3  | 149,167,801 | <i>N/A</i>          |                            |
| cg21158976 | 17 | 73,934,062  | <i>FBF1</i>         | Gene body/1st intron       |
| cg21170629 | 17 | 48,546,341  | <i>CHAD</i>         | TSS200                     |
| cg21178365 | 7  | 150,497,329 | <i>TMEM176B</i>     | Gene body/5'UTR/1st intron |
| cg21197224 | 17 | 56,082,780  | <i>SRSF1</i>        | Gene body                  |
| cg21197843 | 8  | 86,959,593  | <i>N/A</i>          |                            |
| cg21200293 | 3  | 178,043,561 | <i>N/A</i>          |                            |
| cg21228259 | 9  | 133,357,121 | <i>ASS1</i>         | Gene body                  |
| cg21242079 | 15 | 79,101,063  | <i>ADAMTS7</i>      | Gene body/1st intron       |
| cg21243356 | 18 | 3,582,726   | <i>DLGAP1</i>       | Gene body                  |
| cg21252529 | 12 | 131,129,235 | <i>RIMBP2</i>       | Gene body/5'UTR/1st intron |
| cg21291134 | 1  | 159,558,512 | <i>APCS</i>         | Gene body/3'UTR            |
| cg21293943 | 6  | 32,337,906  | <i>C6orf10</i>      | Gene body/1st intron       |
| cg21315720 | 11 | 68,661,124  | <i>MRPL21</i>       | Gene body                  |
| cg21326613 | 7  | 40,786,160  | <i>SUGCT</i>        | Gene body                  |
| cg21333884 | 15 | 85,859,614  | <i>N/A</i>          |                            |
| cg21348134 | 5  | 179,046,114 | <i>HNRNPH1</i>      | Gene body                  |
| cg21348357 | 2  | 171,574,592 | <i>LOC101926913</i> | Gene body                  |
| cg21365566 | 11 | 2,292,256   | <i>ASCL2</i>        | TSS200                     |
| cg21366688 | 6  | 134,491,421 | <i>SGK1</i>         | Gene body                  |
| cg21367940 | 5  | 16,758,222  | <i>MYO10</i>        | Gene body                  |
| cg21368375 | 7  | 19,120,257  | <i>N/A</i>          |                            |
| cg21375294 | 18 | 35,065,040  | <i>CELF4</i>        | Gene body/5'UTR            |
| cg21396064 | 16 | 14,397,766  | <i>MIR193B</i>      | TSS200                     |
| cg21396956 | 18 | 56,340,167  | <i>LOC101927322</i> | TSS1500                    |
| cg21433297 | 7  | 158,918,788 | <i>VIPR2</i>        | Gene body                  |
| cg21459340 | 20 | 2,781,324   | <i>CPXMI</i>        | TSS200                     |
| cg21464891 | 14 | 88,362,339  | <i>N/A</i>          |                            |
| cg21477262 | 12 | 22,777,430  | <i>LOC105369691</i> | Gene body/1st intron       |
| cg21484573 | 6  | 163,730,853 | <i>PACRG</i>        | Gene body                  |
| cg21499470 | 11 | 115,867,910 | <i>N/A</i>          |                            |
| cg21535462 | 12 | 75,905,660  | <i>KRR1</i>         | TSS1500                    |
| cg21541638 | 3  | 61,236,016  | <i>FHIT</i>         | Gene body/5'UTR/1st intron |
| cg21551478 | 2  | 13,069,907  | <i>N/A</i>          |                            |
| cg21566071 | 3  | 175,495,361 | <i>NAALADL2-ASI</i> | TSS1500                    |
| cg21577472 | 7  | 2,561,029   | <i>LFNG</i>         | Gene body/1st intron       |
| cg21608953 | 21 | 16,273,878  | <i>LINC02246</i>    | Gene body/1st intron       |
| cg21610927 | 5  | 14,230,166  | <i>TRIO</i>         | Gene body/1st intron       |
| cg21626564 | 2  | 1,636,438   | <i>PXDN</i>         | Gene body/3'UTR            |
| cg21627604 | 17 | 73,934,020  | <i>FBF1</i>         | Gene body/1st intron       |
| cg21641008 | 6  | 15,319,176  | <i>JARID2</i>       | Gene body/5'UTR/1st intron |
| cg21643178 | 6  | 30,139,573  | <i>TRIM15</i>       | Gene body                  |
| cg21645113 | 2  | 207,275,161 | <i>N/A</i>          |                            |
| cg21648813 | 5  | 116,284,136 | <i>N/A</i>          |                            |
| cg21649461 | 4  | 16,766,592  | <i>LDB2</i>         | Gene body/1st intron       |
| cg21714530 | 15 | 49,324,284  | <i>SECISBP2L</i>    | Gene body                  |
| cg21719957 | 3  | 127,794,225 | <i>RUVBL1-ASI</i>   | TSS1500                    |
| cg21739584 | 3  | 187,452,863 | <i>BCL6</i>         | TSS200                     |
| cg21766667 | 17 | 48,287,888  | <i>N/A</i>          |                            |
| cg21774136 | 1  | 8,593,495   | <i>RERE</i>         | Gene body                  |
| cg21777965 | 5  | 156,799,069 | <i>LOC102724404</i> | Gene body/1st intron       |
| cg21797001 | 20 | 55,904,364  | <i>SPO11</i>        | TSS1500                    |
| cg21811204 | 5  | 132,158,625 | <i>SHROOM1</i>      | Gene body                  |
| cg21814875 | 16 | 4,068,622   | <i>ADCY9</i>        | Gene body                  |
| cg21825143 | 2  | 11,558,156  | <i>N/A</i>          |                            |
| cg21829783 | 1  | 160,493,089 | <i>SLAMF6</i>       | TSS200                     |

|            |    |             |                     |                            |
|------------|----|-------------|---------------------|----------------------------|
| cg21854617 | 8  | 49,595,651  | <i>LOC101929268</i> | Gene body                  |
| cg21860825 | 12 | 19,358,289  | <i>PLEKHA5</i>      | Gene body/5'UTR/1st exon   |
| cg21862992 | 11 | 68,658,383  | <i>N/A</i>          |                            |
| cg21865150 | 17 | 46,804,239  | <i>HOXB13</i>       | Gene body                  |
| cg21865795 | 6  | 42,283,155  | <i>TRERF1</i>       | Gene body/5'UTR            |
| cg21885317 | 8  | 124,248,094 | <i>C8orf76</i>      | Gene body                  |
| cg21886807 | 8  | 17,463,091  | <i>PDGFRL</i>       | Gene body                  |
| cg21920693 | 3  | 3,841,720   | <i>LRRN1</i>        | Gene body/5'UTR/1st intron |
| cg21934772 | 13 | 110,198,949 | <i>N/A</i>          |                            |
| cg21950107 | 6  | 37,109,522  | <i>N/A</i>          |                            |
| cg21973527 | 19 | 5,090,962   | <i>KDM4B</i>        | Gene body                  |
| cg21978251 | 18 | 21,717,686  | <i>CABYR</i>        | TSS1500                    |
| cg21980994 | 10 | 91,907,883  | <i>N/A</i>          |                            |
| cg21982924 | 6  | 31,516,059  | <i>NFKBIL1</i>      | Gene body                  |
| cg22002752 | 8  | 72,834,629  | <i>MSC-ASI</i>      | Gene body/1st intron       |
| cg22031873 | 4  | 143,765,657 | <i>INPP4B</i>       | Gene body/5'UTR/1st intron |
| cg22036487 | 6  | 1,446,441   | <i>N/A</i>          |                            |
| cg22037435 | 19 | 49,250,688  | <i>IZUMO1</i>       | TSS1500                    |
| cg22043544 | 4  | 169,461,374 | <i>PALLD</i>        | Gene body                  |
| cg22045878 | 11 | 76,082,430  | <i>THAP12</i>       | Gene body/1st intron       |
| cg22048348 | 6  | 84,289,493  | <i>SNAP91</i>       | Gene body                  |
| cg22071224 | 2  | 171,572,348 | <i>SP5</i>          | Gene body/1st intron       |
| cg22111714 | 20 | 21,125,520  | <i>KIZ</i>          | Gene body                  |
| cg22118885 | 3  | 33,996,317  | <i>N/A</i>          |                            |
| cg22127309 | 6  | 111,907,043 | <i>TRAF3IP2</i>     | Gene body                  |
| cg22141650 | 2  | 12,282,894  | <i>MIR3681HG</i>    | Gene body                  |
| cg22149137 | 17 | 46,804,414  | <i>HOXB13</i>       | Gene body/1st intron       |
| cg22154859 | 20 | 52,823,177  | <i>PFDN4</i>        | TSS1500                    |
| cg22160073 | 11 | 5,653,405   | <i>TRIM34</i>       | TSS200                     |
| cg22161386 | 6  | 83,616,621  | <i>UBE3D</i>        | Gene body                  |
| cg22178396 | 2  | 65,297,706  | <i>CEP68</i>        | Gene body                  |
| cg22217793 | 18 | 76,683,160  | <i>N/A</i>          |                            |
| cg22218316 | 12 | 3,164,855   | <i>N/A</i>          |                            |
| cg22221487 | 18 | 56,340,068  | <i>LOC101927322</i> | TSS1500                    |
| cg22249658 | 3  | 120,063,232 | <i>LRRC58</i>       | Gene body/1st intron       |
| cg22252897 | 21 | 33,373,888  | <i>HUNK</i>         | Gene body/3'UTR            |
| cg22261083 | 1  | 61,710,490  | <i>NFIA</i>         | Gene body                  |
| cg22283633 | 2  | 233,845,150 | <i>NGEF</i>         | Gene body/5'UTR/1st intron |
| cg22293261 | 17 | 79,958,141  | <i>ASPSCR1</i>      | Gene body                  |
| cg22318792 | 13 | 43,682,146  | <i>DNAJC15</i>      | Gene body/3'UTR            |
| cg22321327 | 11 | 47,639,458  | <i>MTCH2</i>        | Gene body/3'UTR            |
| cg22344703 | 2  | 219,736,312 | <i>WNT6</i>         | Gene body                  |
| cg22346124 | 11 | 2,291,677   | <i>ASCL2</i>        | Gene body/5'UTR/1st exon   |
| cg22349363 | 4  | 55,182,038  | <i>N/A</i>          |                            |
| cg22352818 | 2  | 97,193,289  | <i>N/A</i>          |                            |
| cg22355342 | 7  | 133,717,055 | <i>EXOC4</i>        | Gene body                  |
| cg22381068 | 1  | 906,363     | <i>PLEKHNI</i>      | Gene body                  |
| cg22409914 | 6  | 72,000,436  | <i>OGFRL1</i>       | Gene body/1st intron       |
| cg22410083 | 3  | 59,803,976  | <i>FHIT</i>         | Gene body                  |
| cg22433677 | 7  | 95,529,433  | <i>DYNC111</i>      | Gene body                  |
| cg22435313 | 17 | 64,669,739  | <i>PRKCA</i>        | Gene body                  |
| cg22450406 | 2  | 235,422,165 | <i>N/A</i>          |                            |
| cg22456162 | 6  | 45,387,932  | <i>RUNX2</i>        | Gene body                  |
| cg22461130 | 8  | 123,160,166 | <i>N/A</i>          |                            |
| cg22466032 | 22 | 24,681,310  | <i>SPECCIL</i>      | Gene body/5'UTR/1st intron |
| cg22477100 | 12 | 120,307,157 | <i>CIT</i>          | Gene body                  |

|            |    |             |                     |                            |
|------------|----|-------------|---------------------|----------------------------|
| cg22482787 | 1  | 168,080,625 | <i>GPR161</i>       | Gene body/5'UTR            |
| cg22486777 | 19 | 34,965,973  | <i>N/A</i>          |                            |
| cg22490249 | 15 | 57,506,050  | <i>TCF12</i>        | Gene body                  |
| cg22505411 | 7  | 1,029,594   | <i>N/A</i>          |                            |
| cg22520036 | 17 | 73,933,753  | <i>FBF1</i>         | Gene body/1st intron       |
| cg22549610 | 7  | 40,240,143  | <i>SUGCT</i>        | Gene body                  |
| cg22551587 | 3  | 57,839,184  | <i>SLMAP</i>        | Gene body                  |
| cg22566312 | 7  | 40,515,317  | <i>SUGCT</i>        | Gene body                  |
| cg22571664 | 5  | 32,713,112  | <i>NPR3</i>         | Gene body/1st intron       |
| cg22572779 | 6  | 10,434,761  | <i>MIR5689HG</i>    | Gene body/1st intron       |
| cg22575966 | 13 | 101,283,034 | <i>TMTC4</i>        | Gene body                  |
| cg22581289 | 7  | 40,760,419  | <i>SUGCT</i>        | Gene body                  |
| cg22583065 | 13 | 103,052,828 | <i>FGF14</i>        | Gene body/1st intron       |
| cg22586726 | 10 | 134,150,542 | <i>LRRC27</i>       | TSS200                     |
| cg22594214 | 8  | 135,842,299 | <i>N/A</i>          |                            |
| cg22596998 | 14 | 102,343,072 | <i>PPP2R5C</i>      | Gene body                  |
| cg22607005 | 10 | 4,855,272   | <i>N/A</i>          |                            |
| cg22625918 | 5  | 57,021,011  | <i>N/A</i>          |                            |
| cg22637837 | 5  | 140,730,092 | <i>PCDHGB1</i>      | Gene body/1st exon         |
| cg22657059 | 5  | 140,557,256 | <i>PCDHB8</i>       | TSS200                     |
| cg22664614 | 7  | 129,991,187 | <i>CPA5</i>         | Gene body                  |
| cg22675660 | 17 | 2,827,599   | <i>RAP1GAP2</i>     | Gene body                  |
| cg22687039 | 15 | 52,542,874  | <i>MYO5C</i>        | Gene body                  |
| cg22688428 | 14 | 102,027,671 | <i>DIO3</i>         | TSS200                     |
| cg22699361 | 1  | 854,918     | <i>LOC100130417</i> | Gene body/1st exon         |
| cg22706505 | 2  | 202,563,406 | <i>MPP4</i>         | Gene body/5'UTR/1st exon   |
| cg22710065 | 19 | 54,668,256  | <i>TMC4</i>         | Gene body                  |
| cg22715094 | 6  | 31,783,021  | <i>HSPAIL</i>       | TSS200                     |
| cg22727783 | 5  | 14,441,074  | <i>TRIO</i>         | Gene body                  |
| cg22731812 | 4  | 108,815,258 | <i>SGMS2</i>        | Gene body/5'UTR/1st intron |
| cg22736807 | 5  | 92,938,149  | <i>N/A</i>          |                            |
| cg22746449 | 14 | 67,585,119  | <i>GPHN</i>         | Gene body                  |
| cg22763134 | 4  | 140,715,994 | <i>MAML3</i>        | Gene body                  |
| cg22763593 | 2  | 135,125,439 | <i>MGAT5</i>        | Gene body                  |
| cg22769375 | 8  | 123,150,055 | <i>N/A</i>          |                            |
| cg22809682 | 17 | 63,549,924  | <i>AXIN2</i>        | Gene body                  |
| cg22816087 | 8  | 127,516,484 | <i>N/A</i>          |                            |
| cg22816343 | 8  | 26,243,601  | <i>BNIP3L</i>       | Gene body/1st intron       |
| cg22831101 | 6  | 129,769,086 | <i>LAMA2</i>        | Gene body                  |
| cg22833065 | 17 | 38,095,691  | <i>N/A</i>          |                            |
| cg22834052 | 2  | 86,362,424  | <i>SNORD94</i>      | TSS1500                    |
| cg22836203 | 2  | 12,423,803  | <i>MIR3681HG</i>    | Gene body                  |
| cg22839394 | 7  | 40,397,500  | <i>SUGCT</i>        | Gene body                  |
| cg22841772 | 6  | 27,559,939  | <i>N/A</i>          |                            |
| cg22855642 | 5  | 97,912,185  | <i>N/A</i>          |                            |
| cg22890605 | 22 | 46,858,819  | <i>CELSR1</i>       | Gene body                  |
| cg22891739 | 1  | 240,549,882 | <i>FMN2</i>         | Gene body                  |
| cg22901919 | 4  | 141,317,067 | <i>CLGN</i>         | Gene body                  |
| cg22932808 | 7  | 41,909,842  | <i>N/A</i>          |                            |
| cg22949575 | 17 | 79,948,825  | <i>ASPSCR1</i>      | Gene body                  |
| cg22957360 | 10 | 101,282,572 | <i>N/A</i>          |                            |
| cg22961747 | 17 | 28,973,565  | <i>N/A</i>          |                            |
| cg22962698 | 7  | 150,497,496 | <i>TMEM176B</i>     | Gene body/5'UTR/1st exon   |
| cg22963750 | 12 | 4,581,520   | <i>N/A</i>          |                            |
| cg22965432 | 5  | 100,240,059 | <i>ST8SIA4</i>      | TSS1500                    |
| cg22975540 | 22 | 20,164,349  | <i>N/A</i>          |                            |

|             |    |             |                   |                            |
|-------------|----|-------------|-------------------|----------------------------|
| cg22986606  | 2  | 206,678,431 | <i>N/A</i>        |                            |
| cg23007425  | 14 | 105,600,994 | <i>N/A</i>        |                            |
| cg23007705  | 12 | 81,471,681  | <i>ACSS3</i>      | TSS200                     |
| cg23013309  | 12 | 65,218,841  | <i>TBC1D30</i>    | Gene body/1st intron       |
| cg23021160  | 2  | 73,869,666  | <i>NAT8</i>       | TSS200                     |
| cg23029193  | 5  | 38,258,216  | <i>EGFLAM</i>     | TSS1500                    |
| cg23031748  | 14 | 75,614,844  | <i>TMED10</i>     | Gene body                  |
| cg23040290  | 18 | 2,515,569   | <i>N/A</i>        |                            |
| cg23044005  | 7  | 22,588,840  | <i>N/A</i>        |                            |
| cg23049226  | 15 | 102,182,534 | <i>TM2D3</i>      | Gene body/3'UTR            |
| cg23055481  | 9  | 139,120,479 | <i>QSOX2</i>      | Gene body/1st intron       |
| cg23059304  | 14 | 29,253,725  | <i>LINC02282</i>  | Gene body                  |
| cg23064424  | 3  | 114,219,198 | <i>ZBTB20-AS5</i> | Gene body/1st intron       |
| cg23068312  | 9  | 103,477,296 | <i>N/A</i>        |                            |
| cg23069167  | 3  | 61,550,379  | <i>PTPRG</i>      | Gene body/1st intron       |
| cg23074481  | 18 | 25,867,090  | <i>N/A</i>        |                            |
| cg23075506  | 1  | 212,688,997 | <i>N/A</i>        |                            |
| cg23082515  | 1  | 62,776,914  | <i>KANK4</i>      | Gene body/5'UTR/1st intron |
| cg23087546  | 7  | 83,960,503  | <i>N/A</i>        |                            |
| cg23087992  | 3  | 181,430,208 | <i>SOX2</i>       | Gene body/1st exon         |
| cg23104951  | 6  | 39,855,586  | <i>DAAM2</i>      | Gene body                  |
| cg23109968  | 4  | 152,966,935 | <i>N/A</i>        |                            |
| cg23110005  | 12 | 28,124,233  | <i>PTHLH</i>      | Gene body/5'UTR/1st intron |
| cg23115674  | 2  | 23,422,227  | <i>N/A</i>        |                            |
| cg23133355  | 7  | 2,519,789   | <i>N/A</i>        |                            |
| cg23155911  | 5  | 126,205,009 | <i>3-Mar</i>      | Gene body/3'UTR            |
| cg23166964  | 12 | 124,493,296 | <i>ZNF664</i>     | Gene body/5'UTR            |
| cg23186952  | 11 | 58,384,274  | <i>ZFP91-CNTF</i> | Gene body                  |
| cg23189044  | 11 | 74,178,114  | <i>KCNE3</i>      | Gene body/5'UTR/1st intron |
| cg23189410  | 3  | 147,125,712 | <i>ZIC4</i>       | TSS1500                    |
| cg23196581  | 16 | 79,862,005  | <i>N/A</i>        |                            |
| cg23206209  | 15 | 53,079,494  | <i>ONECUT1</i>    | Gene body/1st intron       |
| cg23217290  | 11 | 68,665,306  | <i>MRPL21</i>     | Gene body                  |
| cg23217765  | 9  | 88,224,992  | <i>AGTPBP1</i>    | Gene body                  |
| cg23227960  | 9  | 686,786     | <i>KANK1</i>      | Gene body/5'UTR/1st exon   |
| cg23229261  | 2  | 63,284,066  | <i>OTX1</i>       | Gene body/3'UTR            |
| cg23237976  | 1  | 236,318,493 | <i>GPR137B</i>    | Gene body/1st intron       |
| cg23256802  | 5  | 133,313,281 | <i>VDAC1</i>      | Gene body                  |
| cg23282115  | 3  | 192,711,447 | <i>N/A</i>        |                            |
| cg23294090  | 8  | 139,509,672 | <i>FAM135B</i>    | TSS1500                    |
| cg23298443  | 7  | 158,818,164 | <i>LINC00689</i>  | Gene body                  |
| cg23305168  | 17 | 66,938,761  | <i>ABCA8</i>      | Gene body/5'UTR            |
| cg23316648  | 4  | 17,096,664  | <i>N/A</i>        |                            |
| cg233350327 | 7  | 73,314,157  | <i>N/A</i>        |                            |
| cg233357995 | 1  | 210,567,246 | <i>HHAT</i>       | Gene body                  |
| cg233369107 | 2  | 207,305,318 | <i>N/A</i>        |                            |
| cg233369683 | 2  | 61,166,843  | <i>N/A</i>        |                            |
| cg23378365  | 5  | 156,696,351 | <i>CYFIP2</i>     | Gene body/5'UTR/1st exon   |
| cg23387597  | 10 | 106,093,778 | <i>ITPRIP</i>     | TSS200                     |
| cg23395702  | 1  | 151,589,144 | <i>SNX27</i>      | Gene body/1st intron       |
| cg23396786  | 2  | 73,299,151  | <i>SFXN5</i>      | TSS200                     |
| cg23407151  | 6  | 53,579,798  | <i>N/A</i>        |                            |
| cg23425865  | 5  | 9,849,111   | <i>LINC02112</i>  | Gene body                  |
| cg23443790  | 2  | 9,527,441   | <i>ASAP2</i>      | Gene body                  |
| cg23448584  | 20 | 2,781,316   | <i>CPXMI</i>      | TSS200                     |
| cg23462242  | 5  | 156,696,185 | <i>CYFIP2</i>     | TSS200                     |

|            |    |             |                   |                            |
|------------|----|-------------|-------------------|----------------------------|
| cg23480730 | 14 | 33,402,027  | <i>N/A</i>        |                            |
| cg23492351 | 2  | 242,008,100 | <i>SNED1</i>      | Gene body                  |
| cg23507521 | 18 | 3,246,932   | <i>MYL12A</i>     | TSS1500                    |
| cg23516261 | 6  | 20,428,221  | <i>E2F3</i>       | Gene body/1st intron       |
| cg23528617 | 5  | 14,440,924  | <i>TRIO</i>       | Gene body                  |
| cg23530486 | 19 | 40,175,047  | <i>LGALS17A</i>   | Gene body                  |
| cg23541304 | 6  | 144,329,726 | <i>HYMAI</i>      | Gene body/1st exon         |
| cg23548151 | 12 | 130,823,838 | <i>PIWIL1</i>     | Gene body/5'UTR/1st intron |
| cg23557746 | 10 | 104,060,662 | <i>GBF1</i>       | Gene body                  |
| cg23573337 | 13 | 42,325,829  | <i>VWA8</i>       | Gene body                  |
| cg23613963 | 3  | 15,819,649  | <i>ANKRD28</i>    | Gene body/5'UTR            |
| cg23615393 | 1  | 159,683,683 | <i>CRP</i>        | Gene body                  |
| cg23625660 | 5  | 135,266,516 | <i>FBXL21</i>     | Gene body/5'UTR/1st intron |
| cg23637803 | 6  | 131,017,503 | <i>N/A</i>        |                            |
| cg23644624 | 22 | 21,386,989  | <i>SLC7A4</i>     | TSS200                     |
| cg23652850 | 14 | 69,425,084  | <i>ACTN1</i>      | Gene body/1st intron       |
| cg23653492 | 12 | 130,590,137 | <i>N/A</i>        |                            |
| cg23653885 | 18 | 74,779,597  | <i>MBP</i>        | Gene body                  |
| cg23660154 | 1  | 110,626,540 | <i>LINC01397</i>  | Gene body/1st intron       |
| cg23663875 | 10 | 118,525,489 | <i>HSPA12A</i>    | Gene body                  |
| cg23684878 | 12 | 65,218,260  | <i>TBC1D30</i>    | TSS200                     |
| cg23685736 | 11 | 126,204,807 | <i>DCPS</i>       | Gene body                  |
| cg23692577 | 4  | 16,995,713  | <i>N/A</i>        |                            |
| cg23710218 | 8  | 72,756,656  | <i>MSC</i>        | Gene body/5'UTR/1st exon   |
| cg23713299 | 2  | 75,829,982  | <i>N/A</i>        |                            |
| cg23729005 | 2  | 219,596,471 | <i>TLL4</i>       | Gene body/5'UTR            |
| cg23729407 | 2  | 235,879,320 | <i>SH3BP4</i>     | Gene body/5'UTR/1st intron |
| cg23731089 | 8  | 141,599,208 | <i>AGO2</i>       | Gene body/1st intron       |
| cg23731267 | 8  | 121,377,713 | <i>COL14A1</i>    | Gene body                  |
| cg23738274 | 20 | 35,122,196  | <i>DLGAP4</i>     | Gene body/1st intron       |
| cg23787937 | 12 | 29,303,160  | <i>FAR2</i>       | Gene body/5'UTR/1st intron |
| cg23811850 | 6  | 24,936,246  | <i>RIPOR2</i>     | Gene body/5'UTR/1st exon   |
| cg23812938 | 4  | 84,474,115  | <i>GPAT3</i>      | Gene body                  |
| cg23836322 | 2  | 159,854,313 | <i>TANC1</i>      | Gene body/5'UTR/1st intron |
| cg23849596 | 4  | 159,574,287 | <i>RXFP1</i>      | Gene body/3'UTR            |
| cg23856611 | 2  | 236,409,849 | <i>AGAP1</i>      | Gene body/1st intron       |
| cg23879831 | 10 | 115,478,900 | <i>CASP7</i>      | Gene body/1st intron       |
| cg23883716 | 17 | 19,215,597  | <i>EPN2</i>       | Gene body                  |
| cg23885854 | 2  | 238,074,797 | <i>N/A</i>        |                            |
| cg23904453 | 18 | 34,119,957  | <i>FHOD3</i>      | Gene body                  |
| cg23909657 | 11 | 125,036,088 | <i>PKNOX2</i>     | Gene body/5'UTR/1st intron |
| cg23926670 | 12 | 28,121,938  | <i>PTHLH</i>      | Gene body                  |
| cg23929343 | 7  | 27,903,724  | <i>JAZF1</i>      | Gene body                  |
| cg23935684 | 8  | 145,103,868 | <i>N/A</i>        |                            |
| cg23940878 | 8  | 90,425,676  | <i>N/A</i>        |                            |
| cg23942526 | 7  | 27,882,598  | <i>JAZF1</i>      | Gene body                  |
| cg23959068 | 1  | 10,499,150  | <i>CENPS</i>      | Gene body                  |
| cg23959206 | 12 | 77,456,884  | <i>E2F7</i>       | Gene body                  |
| cg23960088 | 5  | 34,006,894  | <i>AMACR</i>      | Gene body/1st intron       |
| cg23980878 | 20 | 56,488,345  | <i>N/A</i>        |                            |
| cg23991845 | 4  | 121,770,445 | <i>PRDM5</i>      | Gene body                  |
| cg23995753 | 2  | 160,760,732 | <i>LY75-CD302</i> | Gene body/1st intron       |
| cg23995914 | 4  | 10,459,228  | <i>ZNF518B</i>    | TSS200                     |
| cg24011511 | 6  | 130,288,563 | <i>N/A</i>        |                            |
| cg24024752 | 3  | 145,866,227 | <i>PLOD2</i>      | Gene body/1st intron       |
| cg24041594 | 6  | 100,442,603 | <i>MCHR2</i>      | TSS1500                    |

|            |    |             |                     |                            |
|------------|----|-------------|---------------------|----------------------------|
| cg24052683 | 11 | 113,708,376 | <i>USP28</i>        | Gene body                  |
| cg24053168 | 8  | 71,922,639  | <i>N/A</i>          |                            |
| cg24060744 | 7  | 41,045,529  | <i>N/A</i>          |                            |
| cg24064055 | 8  | 145,104,176 | <i>N/A</i>          |                            |
| cg24064154 | 19 | 44,023,606  | <i>ETHE1</i>        | Gene body/1st intron       |
| cg24069928 | 6  | 167,366,776 | <i>RNASET2</i>      | Gene body/1st intron       |
| cg24083324 | 1  | 214,162,604 | <i>PROX1</i>        | Gene body/5'UTR/1st intron |
| cg24105287 | 2  | 66,809,985  | <i>LINC01798</i>    | Gene body/1st intron       |
| cg24119225 | 5  | 140,344,483 | <i>PCDHAC2</i>      | TSS1500                    |
| cg24122814 | 20 | 62,179,037  | <i>SRMS</i>         | TSS200                     |
| cg24126903 | 11 | 106,119,905 | <i>LOC101928535</i> | TSS1500                    |
| cg24129977 | 2  | 1,748,872   | <i>PXDN</i>         | TSS1500                    |
| cg24148133 | 13 | 114,054,237 | <i>LOC101928841</i> | Gene body/3'UTR            |
| cg24185447 | 5  | 15,935,879  | <i>FBXL7</i>        | Gene body                  |
| cg24202485 | 5  | 1,009,457   | <i>NKD2</i>         | Gene body                  |
| cg24213115 | 11 | 121,970,740 | <i>MIR125B1</i>     | TSS200                     |
| cg24213954 | 2  | 169,560,598 | <i>CERS6</i>        | Gene body                  |
| cg24214699 | 10 | 134,150,451 | <i>LRRC27</i>       | TSS200                     |
| cg24229701 | 12 | 130,821,962 | <i>PIWIL1</i>       | TSS1500                    |
| cg24230185 | 10 | 103,698,992 | <i>C10orf76</i>     | Gene body                  |
| cg24243287 | 1  | 166,938,831 | <i>ILDR2</i>        | Gene body/1st intron       |
| cg24249411 | 11 | 27,744,759  | <i>BDNF</i>         | TSS1500                    |
| cg24253482 | 20 | 33,064,396  | <i>ITCH</i>         | Gene body                  |
| cg24279934 | 2  | 12,624,601  | <i>MIR3681HG</i>    | Gene body                  |
| cg24280832 | 10 | 77,871,958  | <i>LRMDA</i>        | Gene body                  |
| cg24286812 | 7  | 1,026,949   | <i>CYP2W1</i>       | Gene body                  |
| cg24309040 | 12 | 111,664,600 | <i>CUX2</i>         | Gene body                  |
| cg24309788 | 2  | 25,824,577  | <i>DTNB</i>         | Gene body                  |
| cg24361201 | 7  | 19,152,418  | <i>N/A</i>          |                            |
| cg24373619 | 10 | 96,059,372  | <i>PLCE1</i>        | Gene body                  |
| cg24379122 | 1  | 43,290,402  | <i>ERMAP</i>        | TSS1500                    |
| cg24383480 | 3  | 47,466,266  | <i>SCAP</i>         | Gene body                  |
| cg24391912 | 15 | 100,259,320 | <i>N/A</i>          |                            |
| cg24401026 | 6  | 136,732,287 | <i>MAP7</i>         | Gene body                  |
| cg24407459 | 19 | 51,586,331  | <i>KLK14</i>        | Gene body/5'UTR/1st intron |
| cg24420947 | 8  | 117,987,812 | <i>SLC30A8</i>      | Gene body/5'UTR/1st intron |
| cg24421668 | 5  | 179,244,452 | <i>SQSTM1</i>       | Gene body/5'UTR            |
| cg24431872 | 4  | 11,429,036  | <i>HS3ST1</i>       | Gene body/5'UTR/1st intron |
| cg24437311 | 3  | 44,753,069  | <i>ZNF502</i>       | TSS1500                    |
| cg24441324 | 1  | 150,523,231 | <i>MIR4257</i>      | TSS1500                    |
| cg24446429 | 18 | 74,798,054  | <i>MBP</i>          | Gene body                  |
| cg24459951 | 20 | 57,090,236  | <i>APCDD1L-AS1</i>  | TSS200                     |
| cg24464915 | 5  | 66,254,431  | <i>MAST4</i>        | TSS1500                    |
| cg24481182 | 12 | 97,052,035  | <i>CFAP54</i>       | Gene body                  |
| cg24495412 | 7  | 13,218,856  | <i>N/A</i>          |                            |
| cg24504925 | 7  | 41,927,150  | <i>N/A</i>          |                            |
| cg24506862 | 18 | 35,146,670  | <i>CELF4</i>        | TSS1500                    |
| cg24555067 | 19 | 58,740,820  | <i>ZNF544</i>       | Gene body/5'UTR/1st intron |
| cg24568796 | 8  | 99,916,985  | <i>STK3</i>         | Gene body/5'UTR/1st intron |
| cg24584031 | 8  | 108,569,070 | <i>N/A</i>          |                            |
| cg24599651 | 17 | 1,521,034   | <i>SLC43A2</i>      | Gene body                  |
| cg24603444 | 11 | 121,971,247 | <i>MIR100HG</i>     | Gene body/1st exon         |
| cg24606807 | 21 | 43,782,500  | <i>TFF1</i>         | Gene body/3'UTR            |
| cg24632943 | 20 | 51,826,334  | <i>TSHZ2</i>        | Gene body/1st intron       |
| cg24635834 | 5  | 42,949,919  | <i>N/A</i>          |                            |
| cg24636327 | 6  | 129,614,085 | <i>LAMA2</i>        | Gene body                  |

|            |    |             |                     |                            |
|------------|----|-------------|---------------------|----------------------------|
| cg24641646 | 16 | 14,020,486  | <i>ERCC4</i>        | Gene body                  |
| cg24645671 | 7  | 42,656,871  | <i>N/A</i>          |                            |
| cg24669389 | 4  | 169,330,464 | <i>DDX60L</i>       | Gene body                  |
| cg24672022 | 7  | 92,028,946  | <i>ANKIB1</i>       | Gene body/3'UTR            |
| cg24691911 | 2  | 150,991,316 | <i>N/A</i>          |                            |
| cg24696112 | 2  | 160,256,295 | <i>BAZ2B</i>        | Gene body                  |
| cg24699871 | 6  | 30,123,191  | <i>TRIM10</i>       | Gene body                  |
| cg24722198 | 13 | 113,567,732 | <i>N/A</i>          |                            |
| cg24740850 | 5  | 173,317,560 | <i>CPEB4</i>        | Gene body/1st exon         |
| cg24754843 | 12 | 5,497,458   | <i>N/A</i>          |                            |
| cg24764730 | 1  | 202,884,270 | <i>KLHL12</i>       | Gene body                  |
| cg24780185 | 10 | 74,653,173  | <i>OIT3</i>         | TSS200                     |
| cg24782083 | 4  | 41,198,939  | <i>APBB2</i>        | Gene body/5'UTR/1st intron |
| cg24802184 | 20 | 6,673,624   | <i>N/A</i>          |                            |
| cg24805998 | 13 | 98,283,645  | <i>N/A</i>          |                            |
| cg24811265 | 4  | 109,086,525 | <i>LEF1</i>         | Gene body/1st intron       |
| cg24813176 | 2  | 219,736,167 | <i>WNT6</i>         | Gene body                  |
| cg24813857 | 4  | 16,859,428  | <i>LDB2</i>         | Gene body/1st intron       |
| cg24819475 | 4  | 57,397,423  | <i>THEGL</i>        | Gene body/1st intron       |
| cg24824295 | 6  | 148,835,054 | <i>SASH1</i>        | Gene body/5'UTR/1st intron |
| cg24827258 | 5  | 1,800,961   | <i>NDUFS6</i>       | TSS1500                    |
| cg24855857 | 5  | 57,754,512  | <i>PLK2</i>         | Gene body                  |
| cg24872610 | 10 | 3,158,994   | <i>PFKP</i>         | Gene body                  |
| cg24874602 | 4  | 16,960,938  | <i>N/A</i>          |                            |
| cg24898373 | 6  | 152,959,655 | <i>SYNE1</i>        | TSS1500                    |
| cg24910887 | 7  | 3,457,425   | <i>SDK1</i>         | Gene body/1st intron       |
| cg24934492 | 12 | 58,923,839  | <i>N/A</i>          |                            |
| cg24938072 | 17 | 13,460,471  | <i>HS3ST3A1</i>     | Gene body/1st intron       |
| cg24951158 | 22 | 39,749,676  | <i>SYNGR1</i>       | Gene body/1st intron       |
| cg24955672 | 22 | 41,956,735  | <i>LOC105373044</i> | Gene body/1st exon         |
| cg24965450 | 2  | 7,578,495   | <i>LOC100506274</i> | Gene body                  |
| cg24976805 | 1  | 159,685,684 | <i>CRP</i>          | TSS1500                    |
| cg24984777 | 17 | 40,636,525  | <i>ATP6V0A1</i>     | Gene body                  |
| cg24985438 | 2  | 1,644,626   | <i>PXDN</i>         | Gene body                  |
| cg25003598 | 6  | 152,144,059 | <i>ESR1</i>         | Gene body/5'UTR/1st intron |
| cg25014676 | 4  | 129,500,763 | <i>N/A</i>          |                            |
| cg25017900 | 10 | 35,102,487  | <i>PARD3</i>        | Gene body/1st intron       |
| cg25042346 | 6  | 18,990,714  | <i>N/A</i>          |                            |
| cg25050332 | 11 | 316,088     | <i>N/A</i>          |                            |
| cg25074329 | 14 | 29,151,045  | <i>N/A</i>          |                            |
| cg25095994 | 2  | 231,191,727 | <i>SP140L</i>       | TSS200                     |
| cg25112312 | 4  | 10,459,352  | <i>ZNF518B</i>      | TSS1500                    |
| cg25123362 | 10 | 133,793,734 | <i>BNIP3</i>        | Gene body/1st intron       |
| cg25124476 | 7  | 150,497,738 | <i>TMEM176A</i>     | TSS200                     |
| cg25137484 | 11 | 103,339,057 | <i>DYNC2H1</i>      | Gene body                  |
| cg25139259 | 5  | 180,627,171 | <i>TRIM7</i>        | Gene body/5'UTR/1st exon   |
| cg25144770 | 6  | 130,171,043 | <i>TMEM244</i>      | Gene body/1st intron       |
| cg25147604 | 6  | 7,540,971   | <i>DSP</i>          | TSS1500                    |
| cg25168494 | 2  | 63,286,355  | <i>N/A</i>          |                            |
| cg25181651 | 2  | 1,748,132   | <i>PXDN</i>         | Gene body/1st exon         |
| cg25191628 | 1  | 50,886,949  | <i>DMRTA2</i>       | Gene body                  |
| cg25198612 | 7  | 40,591,280  | <i>SUGCT</i>        | Gene body                  |
| cg25218107 | 11 | 86,502,006  | <i>PRSS23</i>       | TSS200                     |
| cg25223327 | 8  | 87,429,423  | <i>WWP1</i>         | Gene body                  |
| cg25228422 | 7  | 19,152,335  | <i>N/A</i>          |                            |
| cg25233900 | 10 | 133,793,646 | <i>BNIP3</i>        | Gene body/1st intron       |



|            |    |             |                     |                            |
|------------|----|-------------|---------------------|----------------------------|
| cg25236512 | 5  | 116,150,282 | <i>N/A</i>          |                            |
| cg25238978 | 3  | 66,349,230  | <i>SLC25A26</i>     | Gene body                  |
| cg25241559 | 2  | 241,989,379 | <i>SNED1</i>        | Gene body                  |
| cg25242556 | 15 | 91,423,375  | <i>FURIN</i>        | Gene body                  |
| cg25247520 | 8  | 128,808,017 | <i>MIR1204</i>      | TSS200                     |
| cg25264630 | 7  | 157,849,744 | <i>PTPRN2</i>       | Gene body                  |
| cg25267513 | 5  | 156,708,190 | <i>CYFIP2</i>       | Gene body/5'UTR/1st intron |
| cg25283465 | 1  | 111,323,341 | <i>N/A</i>          |                            |
| cg25288039 | 20 | 51,107,341  | <i>N/A</i>          |                            |
| cg25298161 | 15 | 41,806,135  | <i>LTK</i>          | TSS200                     |
| cg25298235 | 7  | 107,205,392 | <i>COG5</i>         | TSS1500                    |
| cg25298958 | 6  | 14,373,262  | <i>N/A</i>          |                            |
| cg25310917 | 13 | 101,944,700 | <i>NALCN</i>        | Gene body                  |
| cg25326491 | 6  | 152,960,531 | <i>N/A</i>          |                            |
| cg25349729 | 1  | 214,560,352 | <i>PTPN14</i>       | Gene body                  |
| cg25353287 | 2  | 42,277,667  | <i>PKDCC</i>        | Gene body/1st intron       |
| cg25364972 | 2  | 217,075,573 | <i>N/A</i>          |                            |
| cg25373630 | 18 | 60,984,656  | <i>BCL2</i>         | Gene body                  |
| cg25436826 | 1  | 188,751,462 | <i>N/A</i>          |                            |
| cg25457956 | 11 | 27,743,664  | <i>BDNF</i>         | TSS200                     |
| cg25473910 | 7  | 41,254,173  | <i>N/A</i>          |                            |
| cg25474235 | 8  | 8,203,377   | <i>PRAG1</i>        | Gene body                  |
| cg25494480 | 6  | 45,387,917  | <i>RUNX2</i>        | Gene body                  |
| cg25499067 | 8  | 23,559,988  | <i>NKX2-6</i>       | Gene body                  |
| cg25504717 | 4  | 38,134,130  | <i>TBC1D1</i>       | Gene body                  |
| cg25506413 | 11 | 59,323,620  | <i>N/A</i>          |                            |
| cg25508319 | 11 | 128,778,506 | <i>KCNJ5</i>        | Gene body/5'UTR/1st intron |
| cg25528916 | 19 | 4,328,818   | <i>STAP2</i>        | Gene body                  |
| cg25547520 | 15 | 67,431,285  | <i>SMAD3</i>        | Gene body/1st intron       |
| cg25556432 | 2  | 239,628,926 | <i>N/A</i>          |                            |
| cg25577497 | 12 | 130,937,299 | <i>RIMBP2</i>       | Gene body                  |
| cg25595762 | 5  | 35,130,547  | <i>PRLR</i>         | Gene body/5'UTR/1st intron |
| cg25605633 | 12 | 101,870,005 | <i>SPIC</i>         | Gene body/5'UTR/1st intron |
| cg25610515 | 1  | 23,495,577  | <i>LUZP1</i>        | TSS1500                    |
| cg25612754 | 7  | 948,567     | <i>ADAP1</i>        | Gene body                  |
| cg25622366 | 2  | 63,281,139  | <i>OTX1</i>         | Gene body                  |
| cg25625968 | 5  | 38,464,319  | <i>EGFLAM</i>       | Gene body/3'UTR            |
| cg25635022 | 3  | 170,147,199 | <i>CLDN11</i>       | Gene body                  |
| cg25640931 | 13 | 33,694,410  | <i>STARD13</i>      | Gene body                  |
| cg25641330 | 6  | 54,670,167  | <i>N/A</i>          |                            |
| cg25659364 | 6  | 134,851,388 | <i>LOC101928304</i> | Gene body                  |
| cg25677394 | 3  | 11,178,758  | <i>HRH1</i>         | TSS200                     |
| cg25682112 | 1  | 23,066,408  | <i>EPHB2</i>        | Gene body/1st intron       |
| cg25697694 | 19 | 768,714     | <i>N/A</i>          |                            |
| cg25715498 | 1  | 160,492,991 | <i>SLAMF6</i>       | Gene body/5'UTR/1st exon   |
| cg25730298 | 1  | 245,581,404 | <i>KIF26B</i>       | Gene body                  |
| cg25736251 | 3  | 61,235,869  | <i>FHIT</i>         | Gene body/5'UTR/1st intron |
| cg25751172 | 10 | 54,074,967  | <i>DKK1</i>         | Gene body                  |
| cg25792518 | 17 | 48,545,950  | <i>ACSF2</i>        | Gene body/1st intron       |
| cg25806249 | 13 | 24,297,754  | <i>N/A</i>          |                            |
| cg25807487 | 11 | 68,782,106  | <i>MRGPRF</i>       | TSS1500                    |
| cg25813178 | 7  | 41,613,924  | <i>N/A</i>          |                            |
| cg25824236 | 2  | 214,857,742 | <i>SPAG16</i>       | Gene body                  |
| cg25826143 | 9  | 696,918     | <i>KANK1</i>        | Gene body/5'UTR/1st intron |
| cg25828496 | 17 | 72,415,019  | <i>N/A</i>          |                            |
| cg25830307 | 10 | 77,871,644  | <i>LRMDA</i>        | Gene body                  |

|            |    |             |                     |                            |
|------------|----|-------------|---------------------|----------------------------|
| cg25834238 | 7  | 107,455,883 | <i>N/A</i>          |                            |
| cg25873514 | 17 | 81,014,413  | <i>N/A</i>          |                            |
| cg25893560 | 11 | 128,710,122 | <i>KCNJI</i>        | Gene body                  |
| cg25903319 | 1  | 170,500,150 | <i>GORAB</i>        | TSS1500                    |
| cg25907642 | 5  | 78,260,853  | <i>ARSB</i>         | Gene body                  |
| cg25909532 | 7  | 158,821,175 | <i>VIPR2</i>        | Gene body/3'UTR            |
| cg25923788 | 2  | 207,854,583 | <i>N/A</i>          |                            |
| cg25930780 | 3  | 46,506,292  | <i>LTF</i>          | Gene body/1st intron       |
| cg25937790 | 3  | 119,114,849 | <i>ARHGAP31</i>     | Gene body                  |
| cg25938025 | 6  | 167,508,001 | <i>N/A</i>          |                            |
| cg25946205 | 19 | 13,929,080  | <i>ZSWIM4</i>       | Gene body                  |
| cg25949033 | 10 | 3,149,760   | <i>PFKP</i>         | Gene body                  |
| cg25955126 | 12 | 94,121,046  | <i>LOC101928731</i> | Gene body                  |
| cg25955365 | 2  | 12,213,775  | <i>MIR3681HG</i>    | Gene body                  |
| cg25956481 | 6  | 136,231,018 | <i>PDE7B</i>        | Gene body/1st intron       |
| cg25978327 | 1  | 8,065,039   | <i>N/A</i>          |                            |
| cg25984189 | 17 | 40,625,228  | <i>ATP6V0A1</i>     | Gene body                  |
| cg26001799 | 12 | 120,451,819 | <i>BICDL1</i>       | Gene body                  |
| cg26011314 | 6  | 129,255,129 | <i>LAMA2</i>        | Gene body/1st intron       |
| cg26057683 | 8  | 145,089,059 | <i>SPATC1</i>       | Gene body/1st intron       |
| cg26058474 | 2  | 241,975,035 | <i>SNED1</i>        | Gene body                  |
| cg26066455 | 8  | 23,190,767  | <i>LOXL2</i>        | Gene body                  |
| cg26083389 | 5  | 132,323,789 | <i>N/A</i>          |                            |
| cg26111867 | 4  | 16,838,205  | <i>LDB2</i>         | Gene body/1st intron       |
| cg26147947 | 12 | 130,590,231 | <i>N/A</i>          |                            |
| cg26160218 | 3  | 24,538,388  | <i>THRB-AS1</i>     | Gene body/1st intron       |
| cg26160985 | 6  | 131,703,042 | <i>N/A</i>          |                            |
| cg26168873 | 20 | 56,547,387  | <i>N/A</i>          |                            |
| cg26209975 | 14 | 66,170,994  | <i>FUT8</i>         | Gene body                  |
| cg26218577 | 15 | 69,744,466  | <i>RPLP1</i>        | TSS1500                    |
| cg26261298 | 6  | 144,263,435 | <i>PLAGL1</i>       | Gene body                  |
| cg26263766 | 19 | 58,739,734  | <i>ZNF544</i>       | TSS1500                    |
| cg26274046 | 22 | 29,312,841  | <i>ZNRF3</i>        | TSS1500                    |
| cg26276667 | 10 | 92,916,289  | <i>N/A</i>          |                            |
| cg26277237 | 9  | 631,910     | <i>KANK1</i>        | Gene body/5'UTR            |
| cg26278103 | 7  | 124,404,244 | <i>GPR37</i>        | Gene body/1st exon         |
| cg26304948 | 2  | 36,905,302  | <i>N/A</i>          |                            |
| cg26307117 | 3  | 46,506,552  | <i>LTF</i>          | Gene body/5'UTR/1st exon   |
| cg26320230 | 22 | 35,419,165  | <i>N/A</i>          |                            |
| cg26343910 | 3  | 50,127,982  | <i>RBM5</i>         | Gene body                  |
| cg26344867 | 4  | 157,536,266 | <i>N/A</i>          |                            |
| cg26353598 | 1  | 14,824,776  | <i>N/A</i>          |                            |
| cg26362257 | 12 | 21,788,425  | <i>LDHB</i>         | Gene body/3'UTR            |
| cg26363753 | 3  | 177,913,761 | <i>N/A</i>          |                            |
| cg26381919 | 2  | 1,695,357   | <i>PXDN</i>         | Gene body                  |
| cg26385222 | 7  | 150,497,077 | <i>TMEM176B</i>     | Gene body/5'UTR/1st intron |
| cg26389330 | 5  | 151,057,860 | <i>CLMAT3</i>       | Gene body/1st intron       |
| cg26401955 | 19 | 58,740,730  | <i>ZNF544</i>       | Gene body/5'UTR/1st intron |
| cg26403843 | 5  | 158,634,085 | <i>RNF145</i>       | Gene body/1st intron       |
| cg26416766 | 13 | 28,028,981  | <i>N/A</i>          |                            |
| cg26427109 | 11 | 60,739,019  | <i>CD6</i>          | TSS200                     |
| cg26427165 | 12 | 99,550,106  | <i>ANKS1B</i>       | TSS1500                    |
| cg26433505 | 3  | 118,914,139 | <i>UPK1B</i>        | Gene body                  |
| cg26451499 | 17 | 63,694,336  | <i>CEP112</i>       | Gene body                  |
| cg26451735 | 15 | 74,494,900  | <i>STRA6</i>        | Gene body/5'UTR/1st exon   |
| cg26460366 | 4  | 17,068,050  | <i>N/A</i>          |                            |

|            |    |             |                  |                      |
|------------|----|-------------|------------------|----------------------|
| cg26464998 | 2  | 242,011,086 | <i>SNEDI</i>     | Gene body            |
| cg26490070 | 8  | 135,380,081 | <i>N/A</i>       |                      |
| cg26500016 | 5  | 95,068,252  | <i>SPATA9</i>    | TSS1500              |
| cg26513521 | 7  | 14,060,118  | <i>N/A</i>       |                      |
| cg26519401 | 4  | 53,729,056  | <i>RASL11B</i>   | Gene body/1st intron |
| cg26522157 | 19 | 49,003,082  | <i>LMTK3</i>     | Gene body            |
| cg26531023 | 5  | 135,265,920 | <i>FBXL21</i>    | TSS200               |
| cg26542406 | 7  | 41,921,262  | <i>N/A</i>       |                      |
| cg26551697 | 5  | 176,816,539 | <i>SLC34A1</i>   | Gene body            |
| cg26552003 | 20 | 51,065,550  | <i>N/A</i>       |                      |
| cg26558287 | 16 | 67,428,155  | <i>TPPP3</i>     | TSS1500              |
| cg26562007 | 6  | 111,920,964 | <i>TRAF3IP2</i>  | Gene body            |
| cg26571326 | 19 | 54,986,999  | <i>N/A</i>       |                      |
| cg26585452 | 13 | 50,702,914  | <i>DLEU1</i>     | Gene body            |
| cg26603910 | 17 | 81,014,009  | <i>N/A</i>       |                      |
| cg26616261 | 6  | 31,783,285  | <i>HSPA1A</i>    | TSS200               |
| cg26627769 | 5  | 92,938,402  | <i>N/A</i>       |                      |
| cg26649851 | 7  | 41,611,383  | <i>N/A</i>       |                      |
| cg26654097 | 3  | 168,803,873 | <i>MECOM</i>     | Gene body            |
| cg26657404 | 16 | 85,684,821  | <i>GSE1</i>      | Gene body            |
| cg26667356 | 12 | 65,218,078  | <i>TBC1D30</i>   | TSS1500              |
| cg26677741 | 10 | 54,074,260  | <i>DKK1</i>      | Gene body/1st exon   |
| cg26689716 | 10 | 113,855,489 | <i>N/A</i>       |                      |
| cg26691179 | 16 | 78,211,809  | <i>WWOX</i>      | Gene body            |
| cg26694386 | 1  | 244,868,765 | <i>DESI2</i>     | Gene body            |
| cg26707265 | 11 | 45,713,675  | <i>MIR7154</i>   | TSS1500              |
| cg26716902 | 17 | 40,835,920  | <i>CNTNAP1</i>   | Gene body            |
| cg26717066 | 5  | 132,581,310 | <i>FSTL4</i>     | Gene body            |
| cg26724546 | 8  | 117,140,837 | <i>LINC00536</i> | Gene body            |
| cg26780614 | 19 | 13,929,095  | <i>ZSWIM4</i>    | Gene body            |
| cg26822292 | 10 | 121,329,994 | <i>N/A</i>       |                      |
| cg26827533 | 8  | 22,458,122  | <i>C8orf58</i>   | Gene body/1st intron |
| cg26828058 | 6  | 130,544,162 | <i>SAMD3</i>     | TSS200               |
| cg26856631 | 7  | 32,526,065  | <i>LSM5</i>      | Gene body/3'UTR      |
| cg26886885 | 16 | 85,603,371  | <i>N/A</i>       |                      |
| cg26888463 | 16 | 73,186,844  | <i>N/A</i>       |                      |
| cg26888672 | 10 | 105,655,116 | <i>STN1</i>      | Gene body            |
| cg26895768 | 3  | 188,850,350 | <i>N/A</i>       |                      |
| cg26923045 | 16 | 27,781,225  | <i>KIAA0556</i>  | Gene body            |
| cg26927618 | 7  | 19,402,020  | <i>N/A</i>       |                      |
| cg26932790 | 16 | 21,813,670  | <i>RRN3P1</i>    | Gene body            |
| cg26945941 | 12 | 130,950,952 | <i>RIMBP2</i>    | Gene body            |
| cg26946617 | 8  | 53,191,266  | <i>ST18</i>      | Gene body/5'UTR      |
| cg26957356 | 17 | 38,463,355  | <i>N/A</i>       |                      |
| cg26963367 | 15 | 89,157,841  | <i>N/A</i>       |                      |
| cg27010079 | 1  | 94,529,263  | <i>ABCA4</i>     | Gene body            |
| cg27030279 | 15 | 94,642,674  | <i>LINC01581</i> | Gene body/1st intron |
| cg27045845 | 9  | 14,992,232  | <i>LOC389705</i> | TSS1500              |
| cg27053866 | 3  | 15,428,229  | <i>N/A</i>       |                      |
| cg27064684 | 15 | 94,614,694  | <i>LINC01581</i> | Gene body            |
| cg27091338 | 22 | 35,622,529  | <i>LINC01399</i> | Gene body/1st intron |
| cg27111602 | 1  | 182,376,239 | <i>LINC00272</i> | TSS1500              |
| cg27127608 | 5  | 158,488,659 | <i>EBF1</i>      | Gene body            |
| cg27128939 | 7  | 40,351,128  | <i>SUGCT</i>     | Gene body            |
| cg27131008 | 6  | 160,030,530 | <i>N/A</i>       |                      |
| cg27132471 | 15 | 92,613,280  | <i>SLCO3A1</i>   | Gene body            |

|            |    |             |                  |                            |
|------------|----|-------------|------------------|----------------------------|
| cg27144670 | 15 | 52,161,438  | <i>TMOD3</i>     | Gene body                  |
| cg27165956 | 19 | 11,186,823  | <i>N/A</i>       |                            |
| cg27167937 | 10 | 67,565,861  | <i>N/A</i>       |                            |
| cg27177841 | 1  | 213,125,950 | <i>VASH2</i>     | Gene body                  |
| cg27183311 | 1  | 227,260,129 | <i>CDC42BPA</i>  | Gene body                  |
| cg27207681 | 8  | 57,472,071  | <i>LINC00968</i> | Gene body/1st exon         |
| cg27209464 | 1  | 224,598,183 | <i>WDR26</i>     | Gene body                  |
| cg27215601 | 8  | 126,275,042 | <i>NSMCE2</i>    | Gene body                  |
| cg27219287 | 8  | 72,460,890  | <i>N/A</i>       |                            |
| cg27222368 | 8  | 107,666,942 | <i>OXR1</i>      | Gene body                  |
| cg27226320 | 1  | 175,158,326 | <i>KIAA0040</i>  | Gene body/5'UTR/1st intron |
| cg27230739 | 5  | 138,280,522 | <i>N/A</i>       |                            |
| cg27274947 | 3  | 33,397,605  | <i>FBXL2</i>     | Gene body                  |
| cg27275723 | 1  | 185,887,838 | <i>HMCN1</i>     | Gene body                  |
| cg27282900 | 6  | 30,095,258  | <i>N/A</i>       |                            |
| cg27289181 | 10 | 125,602,907 | <i>CPXM2</i>     | Gene body                  |
| cg27297662 | 21 | 32,509,317  | <i>TIAMI</i>     | Gene body                  |
| cg27298566 | 8  | 117,366,183 | <i>N/A</i>       |                            |
| cg27311153 | 15 | 94,651,923  | <i>LINC01581</i> | TSS1500                    |
| cg27312406 | 6  | 58,490,351  | <i>N/A</i>       |                            |
| cg27314002 | 3  | 46,506,519  | <i>LTF</i>       | Gene body/5'UTR/1st exon   |
| cg27320518 | 10 | 81,678,829  | <i>MBL1P</i>     | TSS1500                    |
| cg27324576 | 3  | 157,212,036 | <i>VEPH1</i>     | Gene body/1st intron       |
| cg27331665 | 11 | 316,456     | <i>N/A</i>       |                            |
| cg27336258 | 14 | 51,886,718  | <i>N/A</i>       |                            |
| cg27344140 | 3  | 43,265,296  | <i>N/A</i>       |                            |
| cg27357306 | 10 | 63,657,059  | <i>N/A</i>       |                            |
| cg27363021 | 13 | 72,202,615  | <i>DACHI</i>     | Gene body                  |
| cg27364560 | 9  | 12,698,601  | <i>TYRP1</i>     | Gene body                  |
| cg27366261 | 1  | 157,980,837 | <i>KIRREL1</i>   | Gene body/1st intron       |
| cg27387239 | 1  | 218,667,548 | <i>MIR548F3</i>  | Gene body                  |
| cg27408431 | 12 | 53,848,281  | <i>PCBP2</i>     | Gene body/5'UTR/1st intron |
| cg27424593 | 3  | 194,168,156 | <i>ATPI3A3</i>   | Gene body                  |
| cg27432352 | 6  | 94,134,198  | <i>N/A</i>       |                            |
| cg27438152 | 15 | 31,515,761  | <i>LOC283710</i> | Gene body                  |
| cg27439042 | 6  | 129,478,919 | <i>LAMA2</i>     | Gene body                  |
| cg27457457 | 8  | 90,556,162  | <i>N/A</i>       |                            |
| cg27477485 | 8  | 126,301,474 | <i>NSMCE2</i>    | Gene body                  |
| cg27490043 | 7  | 71,086,708  | <i>GALNT17</i>   | Gene body                  |
| cg27501362 | 22 | 24,796,628  | <i>SPECCIL</i>   | Gene body                  |
| cg27509092 | 16 | 20,879,305  | <i>DCUNID3</i>   | Gene body/5'UTR/1st intron |
| cg27509510 | 2  | 26,200,001  | <i>KIF3C</i>     | Gene body/1st intron       |
| cg27541188 | 8  | 145,104,322 | <i>N/A</i>       |                            |
| cg27576888 | 6  | 130,537,000 | <i>SAMD3</i>     | Gene body/5'UTR/1st exon   |
| cg27579582 | 2  | 177,992,797 | <i>N/A</i>       |                            |
| cg27586968 | 17 | 38,498,912  | <i>RARA-AS1</i>  | Gene body                  |
| cg27591349 | 10 | 54,074,250  | <i>DKK1</i>      | Gene body/1st exon         |
| cg27594683 | 6  | 7,468,945   | <i>N/A</i>       |                            |
| cg27606564 | 7  | 14,032,365  | <i>ETV1</i>      | TSS1500                    |
| cg27607708 | 8  | 48,592,966  | <i>SPDR</i>      | Gene body                  |
| cg27618671 | 17 | 19,483,043  | <i>N/A</i>       |                            |
| cg27621724 | 20 | 49,308,200  | <i>RIPOR3</i>    | TSS200                     |
| cg27624636 | 2  | 177,499,599 | <i>LINC01116</i> | Gene body/1st intron       |
| cg27626620 | 6  | 167,171,727 | <i>RPS6KA2</i>   | Gene body/1st intron       |
| cg27638035 | 18 | 35,015,753  | <i>CELF4</i>     | Gene body/5'UTR            |
| cg27641801 | 4  | 4,429,265   | <i>STX18</i>     | Gene body                  |

|            |    |            |                 |           |
|------------|----|------------|-----------------|-----------|
| cg27645259 | 19 | 41,119,669 | <i>LTBP4</i>    | Gene body |
| cg27664085 | 15 | 89,157,815 | <i>RARA-ASI</i> | Gene body |

---

<sup>a</sup>Probe ID of the Infinium MethylationEPIC BeadChip. <sup>b</sup>National Center for Biotechnology Information (NCBI) database (Genome Build 37). <sup>c</sup>N/A, not annotated (designed for the intergenic regions). <sup>d</sup>Probe CpG sites were annotated as (a) from 200 bp upstream of the transcription start site (TSS) to 1500 bp upstream of it (TSS1500), (b) from TSS to 200 bp upstream of TSS (TSS200), (c) the 5' untranslated region (UTR), (d) the first exon, (e) the first intron, (f) the gene body (TSS to transcription termination site), (g) the 3' UTR and (h) the intergenic region based on the RefSeq database (<http://www.ncbi.nlm.nih.gov/refseq/>).
