# Supplementary material for: Genome-wide DNA methylation profile of early-onset endometrial cancer: its correlation with genetic aberrations and comparison with late-onset endometrial cancer
Source: PubMed Central journal article supplement — Carcinogenesis. 2019 Mar 9;40(5):611–23. doi: 10.1093/carcin/bgz046 (PMC6610171; doi:10.1093/carcin/bgz046), 2019-03-09
Supplement: bgz046_suppl_supplementary_table_s7.pdf [file bgz046_suppl_supplementary_table_s7.pdf]

**Supplementary Table 7.** The 1,133 probes showing significant differences in DNA methylation levels between 10 samples of late-onset endometrioid endometrial cancer tissue (LE) (patient age >40 yr) with somatic mutations of the *FGFR2* gene (FGFR2-M) and 30 LE samples without such mutations (FGFR2-W) (Welch's t test  $P < 0.01$  and  $\Delta\beta_{\text{FGFR2-M-FGFR2-W}}$  value of more than 0.15 or less than -0.15).

| Target ID <sup>a</sup> | Chromosome | Position <sup>b</sup> | Gene symbol <sup>c</sup> | Gene region <sup>d</sup>   |
|------------------------|------------|-----------------------|--------------------------|----------------------------|
| cg00008075             | 5          | 126,938,799           | <i>N/A</i>               |                            |
| cg00014467             | 20         | 44,081,018            | <i>N/A</i>               |                            |
| cg00018107             | 3          | 6,785,373             | <i>GRM7-AS3</i>          | Gene body                  |
| cg00018276             | 9          | 107,954,218           | <i>N/A</i>               |                            |
| cg00042156             | 10         | 42,970,842            | <i>LINC00839</i>         | TSS200                     |
| cg00055030             | 2          | 204,684,721           | <i>N/A</i>               |                            |
| cg00091953             | 4          | 143,326,541           | <i>INPP4B</i>            | Gene body                  |
| cg00118740             | 13         | 110,069,919           | <i>N/A</i>               |                            |
| cg00140447             | 7          | 128,580,709           | <i>IRF5</i>              | TSS200                     |
| cg00151176             | 1          | 57,934,955            | <i>DAB1</i>              | Gene body/5'UTR            |
| cg00167455             | 4          | 76,277,795            | <i>LINC02483</i>         | TSS1500                    |
| cg00233633             | 7          | 29,153,560            | <i>CPVL</i>              | Gene body                  |
| cg00267142             | 6          | 167,104,601           | <i>RPS6KA2</i>           | Gene body                  |
| cg00308503             | 5          | 160,171,384           | <i>ATP10B</i>            | Gene body/5'UTR            |
| cg00318166             | 4          | 190,230,730           | <i>N/A</i>               |                            |
| cg00355275             | 9          | 34,330,685            | <i>NUDT2</i>             | Gene body/5'UTR/1st intron |
| cg00370748             | 10         | 5,334,280             | <i>N/A</i>               |                            |
| cg00406319             | 10         | 126,851,303           | <i>N/A</i>               |                            |
| cg00409126             | 5          | 67,730,128            | <i>N/A</i>               |                            |
| cg00409861             | 5          | 143,365,769           | <i>N/A</i>               |                            |
| cg00421139             | 8          | 97,172,961            | <i>GDF6</i>              | Gene body/5'UTR/1st exon   |
| cg00437124             | 6          | 114,475,951           | <i>HDAC2-AS2</i>         | Gene body                  |
| cg00512513             | 9          | 112,495,758           | <i>PALM2</i>             | Gene body/1st intron       |
| cg00538147             | 10         | 125,751,609           | <i>N/A</i>               |                            |
| cg00546403             | 7          | 130,695,732           | <i>LINC-PINT</i>         | Gene body                  |
| cg00554453             | 11         | 126,273,058           | <i>ST3GAL4</i>           | TSS1500                    |
| cg00571442             | 3          | 142,613,439           | <i>N/A</i>               |                            |
| cg00606968             | 9          | 123,783,802           | <i>C5</i>                | Gene body                  |
| cg00618155             | 10         | 72,459,629            | <i>ADAMTS14</i>          | Gene body                  |
| cg00618309             | 8          | 129,263,509           | <i>N/A</i>               |                            |
| cg00644330             | 6          | 86,129,097            | <i>N/A</i>               |                            |
| cg00735923             | 7          | 117,119,963           | <i>CFTR</i>              | TSS200                     |
| cg00765828             | 12         | 130,389,013           | <i>TMEM132D</i>          | TSS1500                    |
| cg00791412             | 8          | 40,062,763            | <i>N/A</i>               |                            |
| cg00793655             | 9          | 113,342,021           | <i>SVEP1</i>             | Gene body/5'UTR/1st exon   |
| cg00805506             | 17         | 10,634,532            | <i>TMEM220</i>           | TSS1500                    |
| cg00840927             | 14         | 72,489,762            | <i>RGS6</i>              | Gene body                  |
| cg00843009             | 10         | 123,907,206           | <i>TACC2</i>             | Gene body/5'UTR            |
| cg00868390             | 10         | 130,894,401           | <i>N/A</i>               |                            |
| cg00886780             | 6          | 35,149,727            | <i>N/A</i>               |                            |
| cg00914990             | 3          | 132,360,928           | <i>ACAD11</i>            | Gene body                  |
| cg00961024             | 2          | 225,061,695           | <i>N/A</i>               |                            |
| cg00997387             | 1          | 233,363,393           | <i>PCNX2</i>             | Gene body                  |
| cg01027229             | 7          | 86,572,891            | <i>KIAA1324L</i>         | Gene body                  |
| cg01041257             | 3          | 126,962,922           | <i>N/A</i>               |                            |
| cg01045626             | 11         | 126,273,108           | <i>ST3GAL4</i>           | TSS1500                    |
| cg01046945             | 22         | 38,034,539            | <i>SH3BP1</i>            | TSS1500                    |
| cg01086526             | 5          | 3,188,191             | <i>N/A</i>               |                            |
| cg01113488             | 6          | 119,027,122           | <i>CEP85L</i>            | Gene body/5'UTR/1st intron |
| cg01215169             | 13         | 114,855,572           | <i>RASA3</i>             | Gene body/5'UTR/1st intron |

|            |    |             |                  |                            |
|------------|----|-------------|------------------|----------------------------|
| cg01217815 | 12 | 23,192,600  | <i>N/A</i>       |                            |
| cg01221959 | 16 | 57,864,910  | <i>N/A</i>       |                            |
| cg01261729 | 7  | 86,634,018  | <i>KIAA1324L</i> | Gene body/5'UTR/1st intron |
| cg01290009 | 10 | 134,980,513 | <i>KNDC1</i>     | Gene body/1st intron       |
| cg01297020 | 13 | 106,117,425 | <i>DAOA</i>      | TSS1500                    |
| cg01347553 | 12 | 1,906,764   | <i>CACNA2D4</i>  | Gene body                  |
| cg01356139 | 7  | 40,925,162  | <i>N/A</i>       |                            |
| cg01361499 | 15 | 75,467,997  | <i>N/A</i>       |                            |
| cg01391631 | 5  | 75,477,137  | <i>SV2C</i>      | Gene body                  |
| cg01402360 | 5  | 179,390,655 | <i>RNF130</i>    | Gene body                  |
| cg01403738 | 20 | 53,683,751  | <i>N/A</i>       |                            |
| cg01420564 | 2  | 179,076,804 | <i>OSBPL6</i>    | Gene body/5'UTR/1st intron |
| cg01451973 | 3  | 87,301,674  | <i>CHMP2B</i>    | Gene body                  |
| cg01462856 | 13 | 108,922,745 | <i>TNFSF13B</i>  | Gene body                  |
| cg01513078 | 14 | 105,437,094 | <i>AHNAK2</i>    | TSS1500                    |
| cg01539036 | 20 | 61,340,116  | <i>NTSR1</i>     | TSS200                     |
| cg01539577 | 5  | 126,084,077 | <i>N/A</i>       |                            |
| cg01539879 | 12 | 45,308,559  | <i>NELL2</i>     | TSS1500                    |
| cg01547912 | 6  | 149,915,780 | <i>N/A</i>       |                            |
| cg01561389 | 5  | 20,577,418  | <i>CDH18</i>     | TSS1500                    |
| cg01579600 | 5  | 123,589,203 | <i>LINC01170</i> | Gene body                  |
| cg01624768 | 16 | 85,465,657  | <i>N/A</i>       |                            |
| cg01629746 | 15 | 80,503,618  | <i>CTXND1</i>    | Gene body/5'UTR/1st intron |
| cg01631816 | 12 | 30,155,743  | <i>N/A</i>       |                            |
| cg01719718 | 13 | 36,458,809  | <i>DCLK1</i>     | Gene body                  |
| cg01773689 | 1  | 3,351,615   | <i>PRDM16</i>    | Gene body/3'UTR            |
| cg01781374 | 5  | 110,777,659 | <i>CAMK4</i>     | Gene body/5'UTR            |
| cg01802062 | 16 | 29,833,153  | <i>MVP</i>       | Gene body/5'UTR/1st intron |
| cg01808547 | 15 | 100,742,236 | <i>ADAMTS17</i>  | Gene body                  |
| cg01830177 | 1  | 205,235,444 | <i>TMCC2</i>     | Gene body/1st intron       |
| cg01839674 | 18 | 47,845,303  | <i>N/A</i>       |                            |
| cg01903440 | 13 | 77,063,526  | <i>N/A</i>       |                            |
| cg01910804 | 14 | 38,091,034  | <i>TTC6</i>      | Gene body                  |
| cg01942816 | 7  | 5,535,463   | <i>MIR589</i>    | Gene body/1st exon         |
| cg01948944 | 2  | 85,641,379  | <i>CAPG</i>      | TSS200                     |
| cg01961252 | 12 | 54,955,143  | <i>PDE1B</i>     | TSS200                     |
| cg01987164 | 7  | 140,773,893 | <i>TMEM178B</i>  | TSS200                     |
| cg02005600 | 7  | 27,183,686  | <i>HOXA5</i>     | TSS1500                    |
| cg02089629 | 10 | 135,050,933 | <i>VENTX</i>     | TSS1500                    |
| cg02093006 | 10 | 32,201,942  | <i>ARHGAP12</i>  | Gene body/5'UTR/1st intron |
| cg02117095 | 18 | 52,520,188  | <i>RAB27B</i>    | Gene body/5'UTR/1st intron |
| cg02131499 | 10 | 127,445,277 | <i>EDRF1</i>     | Gene body                  |
| cg02221604 | 3  | 32,464,672  | <i>CMTM7</i>     | Gene body/1st intron       |
| cg02244431 | 2  | 236,588,226 | <i>AGAPI</i>     | Gene body/1st intron       |
| cg02244450 | 12 | 75,083,361  | <i>N/A</i>       |                            |
| cg02246605 | 20 | 39,591,425  | <i>N/A</i>       |                            |
| cg02269453 | 8  | 9,009,499   | <i>PPP1R3B</i>   | TSS1500                    |
| cg02292809 | 6  | 17,101,478  | <i>STMND1</i>    | TSS1500                    |
| cg02300329 | 14 | 55,574,999  | <i>N/A</i>       |                            |
| cg02302574 | 13 | 29,280,140  | <i>SLC46A3</i>   | Gene body                  |
| cg02322911 | 12 | 91,575,609  | <i>DCN</i>       | Gene body/5'UTR/1st intron |
| cg02325664 | 15 | 51,507,425  | <i>CYP19A1</i>   | Gene body                  |
| cg02336919 | 11 | 68,694,943  | <i>IGHMBP2</i>   | Gene body                  |
| cg02425511 | 1  | 64,637,392  | <i>ROR1</i>      | Gene body                  |
| cg02459648 | 12 | 104,613,282 | <i>TXNRD1</i>    | Gene body/1st intron       |
| cg02468728 | 19 | 611,107     | <i>HCN2</i>      | Gene body                  |

|            |    |             |                   |                            |
|------------|----|-------------|-------------------|----------------------------|
| cg02472998 | 13 | 45,945,362  | <i>TPT1-AS1</i>   | Gene body                  |
| cg02486009 | 15 | 22,428,395  | <i>N/A</i>        |                            |
| cg02501473 | 3  | 189,909,740 | <i>N/A</i>        |                            |
| cg02502727 | 20 | 11,780,146  | <i>N/A</i>        |                            |
| cg02523356 | 1  | 19,728,685  | <i>CAPZB</i>      | Gene body                  |
| cg02575448 | 5  | 140,749,735 | <i>PCDHGB3</i>    | TSS200                     |
| cg02621446 | 5  | 1,119,344   | <i>N/A</i>        |                            |
| cg02646423 | 7  | 27,183,794  | <i>HOXA5</i>      | TSS1500                    |
| cg02666815 | 18 | 53,815,428  | <i>LOC642484</i>  | Gene body                  |
| cg02672827 | 3  | 16,557,690  | <i>N/A</i>        |                            |
| cg02682249 | 20 | 38,521,893  | <i>N/A</i>        |                            |
| cg02690881 | 12 | 68,767,945  | <i>N/A</i>        |                            |
| cg02727150 | 12 | 116,774,745 | <i>N/A</i>        |                            |
| cg02733351 | 20 | 43,802,992  | <i>PI3</i>        | TSS1500                    |
| cg02738379 | 6  | 42,284,567  | <i>TRERF1</i>     | Gene body/5'UTR            |
| cg02749784 | 8  | 120,219,927 | <i>MAL2</i>       | TSS1500                    |
| cg02750974 | 14 | 59,214,279  | <i>N/A</i>        |                            |
| cg02833180 | 2  | 198,815,064 | <i>PLCL1</i>      | Gene body/1st intron       |
| cg02870602 | 8  | 119,659,346 | <i>SAMD12-AS1</i> | Gene body                  |
| cg02890772 | 7  | 788,831     | <i>DNAAF5</i>     | Gene body                  |
| cg02920196 | 6  | 32,605,283  | <i>HLA-DQA1</i>   | Gene body/1st exon         |
| cg02925118 | 14 | 75,766,014  | <i>N/A</i>        |                            |
| cg02927327 | 6  | 35,265,759  | <i>DEF6</i>       | Gene body/1st intron       |
| cg02955348 | 3  | 101,546,408 | <i>NFKBIZ</i>     | TSS1500                    |
| cg02958455 | 22 | 30,366,883  | <i>MTMR3</i>      | Gene body/5'UTR            |
| cg03035213 | 16 | 88,497,077  | <i>ZNF469</i>     | Gene body/1st intron       |
| cg03041641 | 17 | 64,671,047  | <i>PRKCA</i>      | Gene body                  |
| cg03049220 | 19 | 57,862,965  | <i>ZNF304</i>     | Gene body/5'UTR/1st exon   |
| cg03052004 | 6  | 11,702,389  | <i>N/A</i>        |                            |
| cg03073665 | 5  | 97,480,475  | <i>LINC01846</i>  | Gene body                  |
| cg03075889 | 7  | 1,976,457   | <i>MAD1L1</i>     | Gene body                  |
| cg03076037 | 17 | 79,071,361  | <i>BAIAP2</i>     | Gene body                  |
| cg03125462 | 3  | 29,228,761  | <i>N/A</i>        |                            |
| cg03135704 | 11 | 5,712,109   | <i>TRIM22</i>     | Gene body/5'UTR/1st intron |
| cg03160370 | 20 | 53,223,875  | <i>DOK5</i>       | Gene body                  |
| cg03176205 | 18 | 73,946,714  | <i>N/A</i>        |                            |
| cg03186331 | 1  | 64,087,577  | <i>PGM1</i>       | TSS1500                    |
| cg03195531 | 4  | 57,977,040  | <i>IGFBP7</i>     | TSS1500                    |
| cg03206359 | 5  | 172,663,793 | <i>NKX2-5</i>     | TSS1500                    |
| cg03207666 | 7  | 27,183,950  | <i>HOXA5</i>      | TSS1500                    |
| cg03209812 | 5  | 43,008,306  | <i>N/A</i>        |                            |
| cg03212131 | 5  | 33,958,213  | <i>SLC45A2</i>    | Gene body                  |
| cg03242417 | 18 | 42,871,675  | <i>SLC14A2</i>    | Gene body/5'UTR/1st intron |
| cg03261565 | 10 | 29,312,799  | <i>N/A</i>        |                            |
| cg03280839 | 3  | 3,865,730   | <i>LRRN1</i>      | Gene body/5'UTR            |
| cg03282572 | 11 | 20,077,814  | <i>NAV2</i>       | Gene body                  |
| cg03288751 | 3  | 15,717,692  | <i>ANKRD28</i>    | Gene body                  |
| cg03290400 | 6  | 100,903,909 | <i>SIM1</i>       | Gene body/1st intron       |
| cg03348685 | 11 | 64,728,258  | <i>MAJIN</i>      | Gene body/5'UTR/1st intron |
| cg03409737 | 16 | 24,902,498  | <i>SLC5A11</i>    | Gene body                  |
| cg03420881 | 2  | 130,763,516 | <i>N/A</i>        |                            |
| cg03434660 | 17 | 66,082,213  | <i>N/A</i>        |                            |
| cg03443943 | 4  | 177,922,420 | <i>N/A</i>        |                            |
| cg03449448 | 20 | 57,721,575  | <i>N/A</i>        |                            |
| cg03453917 | 10 | 124,896,232 | <i>HMX3</i>       | Gene body/1st intron       |
| cg03454017 | 15 | 71,479,333  | <i>THSD4-AS1</i>  | Gene body/1st intron       |

|            |    |             |                     |                            |
|------------|----|-------------|---------------------|----------------------------|
| cg03458316 | 10 | 77,258,084  | <i>LRMDA</i>        | Gene body                  |
| cg03473518 | 13 | 20,805,656  | <i>GJB6</i>         | TSS1500                    |
| cg03478122 | 2  | 66,809,241  | <i>LINC01798</i>    | Gene body/1st intron       |
| cg03585720 | 1  | 235,048,762 | <i>N/A</i>          |                            |
| cg03683583 | 11 | 118,314,223 | <i>KMT2A</i>        | Gene body/1st intron       |
| cg03734437 | 8  | 97,173,526  | <i>GDF6</i>         | TSS1500                    |
| cg03739737 | 6  | 82,643,203  | <i>LINC02542</i>    | TSS200                     |
| cg03778155 | 6  | 127,440,843 | <i>RSPO3</i>        | Gene body/1st intron       |
| cg03799405 | 4  | 1,595,726   | <i>N/A</i>          |                            |
| cg03820640 | 10 | 123,914,963 | <i>TACC2</i>        | Gene body/5'UTR            |
| cg03845718 | 17 | 80,186,085  | <i>SLC16A3</i>      | TSS200                     |
| cg03852144 | 5  | 95,159,639  | <i>GLRX</i>         | TSS1500                    |
| cg03877418 | 2  | 242,757,444 | <i>NEU4</i>         | Gene body                  |
| cg03898952 | 13 | 107,069,935 | <i>N/A</i>          |                            |
| cg03899412 | 5  | 3,325,319   | <i>N/A</i>          |                            |
| cg03921357 | 1  | 3,809,431   | <i>C1orf174</i>     | Gene body                  |
| cg04015541 | 9  | 127,558,373 | <i>OLFML2A</i>      | Gene body                  |
| cg04041976 | 8  | 67,085,823  | <i>TRIM55</i>       | Gene body                  |
| cg04057934 | 11 | 10,616,273  | <i>MRVII-ASI</i>    | Gene body                  |
| cg04058516 | 19 | 49,465,843  | <i>N/A</i>          |                            |
| cg04059338 | 13 | 108,922,375 | <i>TNFSF13B</i>     | Gene body/1st exon         |
| cg04063945 | 10 | 23,982,480  | <i>KIAA1217</i>     | TSS1500                    |
| cg04075726 | 2  | 69,499,425  | <i>N/A</i>          |                            |
| cg04084447 | 7  | 28,394,254  | <i>CREB5</i>        | Gene body/5'UTR/1st intron |
| cg04086097 | 7  | 128,580,792 | <i>IRF5</i>         | Gene body/5'UTR/1st exon   |
| cg04132288 | 2  | 169,922,793 | <i>DHRS9</i>        | TSS1500                    |
| cg04172297 | 20 | 38,457,715  | <i>N/A</i>          |                            |
| cg04176388 | 11 | 12,116,675  | <i>N/A</i>          |                            |
| cg04184297 | 17 | 80,186,266  | <i>SLC16A3</i>      | TSS200                     |
| cg04189665 | 20 | 16,555,226  | <i>KIF16B</i>       | TSS1500                    |
| cg04327529 | 10 | 52,834,121  | <i>PRKG1</i>        | TSS200                     |
| cg04353474 | 3  | 18,787,223  | <i>N/A</i>          |                            |
| cg04364800 | 3  | 160,653,423 | <i>PPM1L</i>        | Gene body                  |
| cg04373123 | 10 | 29,063,071  | <i>LINC01517</i>    | Gene body                  |
| cg04442818 | 20 | 38,245,193  | <i>N/A</i>          |                            |
| cg04488894 | 10 | 5,067,466   | <i>N/A</i>          |                            |
| cg04542365 | 2  | 186,601,423 | <i>LOC101927196</i> | Gene body/1st intron       |
| cg04585778 | 17 | 54,395,292  | <i>ANKFN1</i>       | Gene body                  |
| cg04606087 | 11 | 129,907,308 | <i>N/A</i>          |                            |
| cg04648402 | 4  | 987,561     | <i>SLC26A1</i>      | TSS1500                    |
| cg04737018 | 12 | 83,867,579  | <i>N/A</i>          |                            |
| cg04774930 | 16 | 23,768,982  | <i>CHP2</i>         | Gene body/3'UTR            |
| cg04795044 | 3  | 129,344,706 | <i>N/A</i>          |                            |
| cg04846720 | 14 | 103,295,640 | <i>TRAF3</i>        | Gene body/5'UTR/1st intron |
| cg04848660 | 7  | 41,174,125  | <i>N/A</i>          |                            |
| cg04935792 | 12 | 45,354,182  | <i>N/A</i>          |                            |
| cg04963199 | 16 | 87,868,947  | <i>MIR6775</i>      | TSS1500                    |
| cg04974584 | 6  | 127,440,729 | <i>RSPO3</i>        | Gene body/1st intron       |
| cg04983543 | 14 | 77,526,156  | <i>LINC02288</i>    | Gene body                  |
| cg04998327 | 11 | 103,453,960 | <i>N/A</i>          |                            |
| cg05030067 | 14 | 75,765,449  | <i>N/A</i>          |                            |
| cg05103064 | 10 | 7,311,500   | <i>SFMBT2</i>       | Gene body                  |
| cg05115985 | 9  | 135,458,034 | <i>BARHL1</i>       | Gene body/5'UTR/1st exon   |
| cg05186771 | 7  | 41,020,750  | <i>LINC01450</i>    | TSS1500                    |
| cg05202414 | 20 | 38,259,025  | <i>N/A</i>          |                            |
| cg05203113 | 4  | 11,489,579  | <i>N/A</i>          |                            |

|            |    |             |                     |                            |
|------------|----|-------------|---------------------|----------------------------|
| cg05227865 | 5  | 173,221,156 | <i>N/A</i>          |                            |
| cg05248742 | 16 | 24,142,386  | <i>PRKCB</i>        | Gene body                  |
| cg05272349 | 5  | 122,434,379 | <i>PRDM6</i>        | Gene body                  |
| cg05277122 | 14 | 103,538,143 | <i>N/A</i>          |                            |
| cg05295038 | 20 | 61,340,107  | <i>NTSR1</i>        | TSS200                     |
| cg05309683 | 18 | 34,107,658  | <i>FHOD3</i>        | Gene body                  |
| cg05339108 | 14 | 54,970,214  | <i>N/A</i>          |                            |
| cg05365199 | 1  | 221,604,887 | <i>N/A</i>          |                            |
| cg05367053 | 8  | 107,141,442 | <i>N/A</i>          |                            |
| cg05524170 | 8  | 18,069,641  | <i>NAT1</i>         | Gene body/5'UTR/1st intron |
| cg05562252 | 6  | 109,692,255 | <i>CD164</i>        | Gene body                  |
| cg05564182 | 1  | 221,219,852 | <i>N/A</i>          |                            |
| cg05568059 | 16 | 83,877,598  | <i>N/A</i>          |                            |
| cg05593194 | 7  | 150,759,483 | <i>SLC4A2</i>       | TSS200                     |
| cg05620690 | 10 | 117,875,637 | <i>GFRA1</i>        | Gene body                  |
| cg05630016 | 19 | 51,815,281  | <i>IGLON5</i>       | Gene body/1st intron       |
| cg05646686 | 14 | 33,402,368  | <i>N/A</i>          |                            |
| cg05658053 | 18 | 67,347,747  | <i>DOK6</i>         | Gene body                  |
| cg05681826 | 7  | 5,526,443   | <i>FBXL18</i>       | Gene body                  |
| cg05686633 | 17 | 80,186,161  | <i>SLC16A3</i>      | TSS200                     |
| cg05688936 | 7  | 77,724,828  | <i>MAGI2</i>        | Gene body                  |
| cg05690276 | 9  | 96,293,821  | <i>FAM120A</i>      | Gene body                  |
| cg05708584 | 14 | 92,210,632  | <i>N/A</i>          |                            |
| cg05732044 | 15 | 73,290,700  | <i>N/A</i>          |                            |
| cg05754361 | 16 | 57,209,801  | <i>FAM192A</i>      | Gene body/1st intron       |
| cg05768331 | 11 | 20,689,672  | <i>NELL1</i>        | TSS1500                    |
| cg05819371 | 12 | 92,540,484  | <i>LOC101928617</i> | Gene body                  |
| cg05822984 | 12 | 75,083,385  | <i>N/A</i>          |                            |
| cg05833067 | 7  | 43,094,396  | <i>N/A</i>          |                            |
| cg05907046 | 2  | 187,713,986 | <i>ZSWIM2</i>       | TSS200                     |
| cg06008062 | 11 | 73,358,518  | <i>PLEKHB1</i>      | TSS200                     |
| cg06106103 | 13 | 28,493,012  | <i>PDX1</i>         | TSS1500                    |
| cg06127572 | 12 | 68,954,021  | <i>N/A</i>          |                            |
| cg06129705 | 5  | 33,840,879  | <i>ADAMTS12</i>     | Gene body                  |
| cg06134744 | 13 | 77,964,626  | <i>N/A</i>          |                            |
| cg06188746 | 7  | 27,179,800  | <i>HOXA-AS3</i>     | TSS200                     |
| cg06263193 | 18 | 28,622,912  | <i>DSC3</i>         | TSS200                     |
| cg06356708 | 1  | 17,760,589  | <i>RCC2</i>         | Gene body/1st intron       |
| cg06373086 | 20 | 48,658,164  | <i>TRERNA1</i>      | Gene body/1st exon         |
| cg06389521 | 1  | 226,016,396 | <i>EPHX1</i>        | Gene body/5'UTR/1st intron |
| cg06402858 | 9  | 91,692,642  | <i>SHC3</i>         | Gene body                  |
| cg06404662 | 20 | 62,038,206  | <i>KCNQ2</i>        | Gene body                  |
| cg06433467 | 5  | 67,730,071  | <i>N/A</i>          |                            |
| cg06440574 | 5  | 33,910,837  | <i>N/A</i>          |                            |
| cg06495946 | 4  | 1,303,094   | <i>MAEA</i>         | TSS200                     |
| cg06500714 | 10 | 135,050,622 | <i>VENTX</i>        | TSS1500                    |
| cg06529676 | 5  | 170,119,162 | <i>KCNIP1</i>       | Gene body/1st intron       |
| cg06576393 | 10 | 99,531,416  | <i>SFRP5</i>        | Gene body/1st exon         |
| cg06634473 | 14 | 88,792,937  | <i>KCNK10</i>       | Gene body/5'UTR/1st exon   |
| cg06652632 | 2  | 24,584,081  | <i>ITSN2</i>        | TSS1500                    |
| cg06655097 | 4  | 177,455,600 | <i>N/A</i>          |                            |
| cg06658791 | 4  | 146,408,069 | <i>SMAD1</i>        | Gene body/5'UTR/1st intron |
| cg06667574 | 19 | 51,830,634  | <i>IGLON5</i>       | Gene body                  |
| cg06671642 | 6  | 137,736,980 | <i>N/A</i>          |                            |
| cg06676119 | 2  | 183,312,755 | <i>PDE1A</i>        | Gene body/1st intron       |
| cg06764239 | 1  | 119,544,772 | <i>LOC105378933</i> | TSS1500                    |

|            |    |             |                  |                            |
|------------|----|-------------|------------------|----------------------------|
| cg06776644 | 11 | 93,218,074  | <i>SMCO4</i>     | Gene body/5'UTR            |
| cg06795649 | 15 | 30,135,976  | <i>TJP1</i>      | Gene body                  |
| cg06795995 | 5  | 56,204,613  | <i>SETD9</i>     | TSS1500                    |
| cg06798578 | 3  | 135,503,635 | <i>N/A</i>       |                            |
| cg06799735 | 14 | 105,437,141 | <i>AHNAK2</i>    | TSS1500                    |
| cg06805940 | 5  | 160,062,666 | <i>ATP10B</i>    | Gene body                  |
| cg06813732 | 7  | 77,771,161  | <i>MAGI2</i>     | Gene body                  |
| cg06842253 | 2  | 47,863,922  | <i>N/A</i>       |                            |
| cg06885320 | 1  | 35,408,885  | <i>N/A</i>       |                            |
| cg06932780 | 7  | 5,526,333   | <i>FBXL18</i>    | Gene body                  |
| cg06945523 | 14 | 36,974,800  | <i>SFTA3</i>     | Gene body/1st intron       |
| cg06968859 | 2  | 80,724,209  | <i>CTNNA2</i>    | Gene body                  |
| cg07002468 | 9  | 125,404,891 | <i>N/A</i>       |                            |
| cg07025011 | 7  | 32,299,702  | <i>PDE1C</i>     | Gene body/1st intron       |
| cg07028821 | 7  | 140,773,905 | <i>TMEM178B</i>  | TSS200                     |
| cg07062747 | 3  | 28,122,982  | <i>N/A</i>       |                            |
| cg07112162 | 14 | 72,920,769  | <i>RGS6</i>      | Gene body                  |
| cg07115262 | 12 | 52,702,819  | <i>KRT86</i>     | Gene body/3'UTR            |
| cg07121221 | 12 | 100,310,532 | <i>ANKS1B</i>    | Gene body/1st intron       |
| cg07133760 | 10 | 135,266,884 | <i>SCART1</i>    | TSS1500                    |
| cg07136210 | 1  | 89,765,537  | <i>N/A</i>       |                            |
| cg07142406 | 3  | 189,791,243 | <i>P3H2</i>      | Gene body/1st intron       |
| cg07151897 | 7  | 140,773,891 | <i>TMEM178B</i>  | TSS200                     |
| cg07154517 | 20 | 38,440,895  | <i>N/A</i>       |                            |
| cg07195851 | 5  | 3,517,522   | <i>LINC01019</i> | Gene body                  |
| cg07247925 | 19 | 15,635,627  | <i>CYP4F22</i>   | Gene body/5'UTR            |
| cg07254040 | 8  | 139,988,194 | <i>N/A</i>       |                            |
| cg07328369 | 9  | 21,413,718  | <i>N/A</i>       |                            |
| cg07332336 | 4  | 156,130,588 | <i>NPY2R</i>     | Gene body/5'UTR/1st intron |
| cg07341230 | 13 | 36,564,524  | <i>DCLK1</i>     | Gene body                  |
| cg07348418 | 1  | 44,903,330  | <i>RNF220</i>    | Gene body/5'UTR/1st intron |
| cg07370771 | 10 | 135,050,957 | <i>VENTX</i>     | TSS1500                    |
| cg07375732 | 12 | 29,312,659  | <i>FAR2</i>      | Gene body/5'UTR/1st intron |
| cg07398316 | 3  | 18,168,830  | <i>LOC339862</i> | Gene body                  |
| cg07436694 | 16 | 21,638,444  | <i>METTL9</i>    | Gene body                  |
| cg07437284 | 10 | 93,516,234  | <i>N/A</i>       |                            |
| cg07464278 | 19 | 2,677,176   | <i>GNG7</i>      | Gene body/5'UTR/1st intron |
| cg07474682 | 16 | 89,573,562  | <i>SPG7</i>      | TSS1500                    |
| cg07501635 | 3  | 53,714,168  | <i>CACNA1D</i>   | Gene body                  |
| cg07548607 | 2  | 187,713,964 | <i>ZSWIM2</i>    | TSS200                     |
| cg07564261 | 17 | 66,379,574  | <i>ARSG</i>      | Gene body                  |
| cg07596743 | 13 | 24,029,640  | <i>N/A</i>       |                            |
| cg07615111 | 13 | 114,965,537 | <i>N/A</i>       |                            |
| cg07628784 | 7  | 7,801,586   | <i>UMAD1</i>     | Gene body                  |
| cg07630449 | 20 | 23,321,299  | <i>N/A</i>       |                            |
| cg07639783 | 7  | 1,610,747   | <i>PSMG3-AS1</i> | Gene body/1st intron       |
| cg07656520 | 18 | 9,658,170   | <i>N/A</i>       |                            |
| cg07675221 | 17 | 1,034,285   | <i>ABR</i>       | Gene body/1st intron       |
| cg07698834 | 10 | 14,029,616  | <i>FRMD4A</i>    | Gene body/1st intron       |
| cg07751325 | 3  | 7,340,242   | <i>GRM7</i>      | Gene body                  |
| cg07761546 | 11 | 104,069,562 | <i>N/A</i>       |                            |
| cg07807111 | 17 | 8,699,116   | <i>N/A</i>       |                            |
| cg07824053 | 9  | 107,381,132 | <i>OR13C9</i>    | TSS1500                    |
| cg07832006 | 1  | 115,397,374 | <i>SYCP1</i>     | TSS200                     |
| cg07913086 | 3  | 18,278,830  | <i>LOC339862</i> | Gene body                  |
| cg07919205 | 15 | 48,647,187  | <i>N/A</i>       |                            |

|            |    |             |                  |                            |
|------------|----|-------------|------------------|----------------------------|
| cg07953656 | 16 | 1,312,628   | <i>N/A</i>       |                            |
| cg08003251 | 6  | 137,469,991 | <i>IL22RA2</i>   | Gene body                  |
| cg08016257 | 7  | 134,833,166 | <i>TMEM140</i>   | Gene body/5'UTR/1st intron |
| cg08057985 | 22 | 42,470,123  | <i>FAM109B</i>   | TSS200                     |
| cg08058192 | 16 | 52,173,910  | <i>N/A</i>       |                            |
| cg08069211 | 17 | 72,159,332  | <i>N/A</i>       |                            |
| cg08084441 | 19 | 2,577,160   | <i>GNG7</i>      | Gene body/5'UTR            |
| cg08092318 | 16 | 75,625,571  | <i>N/A</i>       |                            |
| cg08101264 | 20 | 44,486,710  | <i>ZSWIM3</i>    | Gene body/1st intron       |
| cg08103980 | 16 | 1,682,130   | <i>CRAMP1</i>    | Gene body                  |
| cg08125310 | 13 | 77,989,720  | <i>N/A</i>       |                            |
| cg08183467 | 1  | 31,989,517  | <i>LINC01226</i> | Gene body                  |
| cg08196933 | 13 | 79,263,402  | <i>N/A</i>       |                            |
| cg08249988 | 19 | 19,322,818  | <i>NCAN</i>      | Gene body/5'UTR/1st exon   |
| cg08292018 | 18 | 53,453,900  | <i>N/A</i>       |                            |
| cg08296680 | 17 | 80,186,275  | <i>SLC16A3</i>   | TSS200                     |
| cg08322181 | 13 | 111,980,655 | <i>TEX29</i>     | Gene body                  |
| cg08355045 | 6  | 80,787,529  | <i>N/A</i>       |                            |
| cg08360638 | 13 | 20,781,097  | <i>N/A</i>       |                            |
| cg08364510 | 7  | 157,295,931 | <i>N/A</i>       |                            |
| cg08387459 | 2  | 111,752,234 | <i>ACOXL</i>     | Gene body                  |
| cg08466395 | 11 | 126,272,964 | <i>ST3GAL4</i>   | TSS1500                    |
| cg08479752 | 19 | 54,567,279  | <i>VSTMI</i>     | TSS200                     |
| cg08484423 | 10 | 34,978,246  | <i>PARD3</i>     | Gene body                  |
| cg08489309 | 3  | 54,067,965  | <i>N/A</i>       |                            |
| cg08515380 | 22 | 39,662,795  | <i>N/A</i>       |                            |
| cg08577063 | 2  | 169,957,562 | <i>N/A</i>       |                            |
| cg08593626 | 20 | 38,428,248  | <i>N/A</i>       |                            |
| cg08607317 | 18 | 53,638,570  | <i>N/A</i>       |                            |
| cg08622826 | 8  | 134,094,692 | <i>SLA</i>       | Gene body/1st intron       |
| cg08648894 | 8  | 29,097,868  | <i>KIF13B</i>    | Gene body                  |
| cg08663152 | 19 | 48,244,519  | <i>EHD2</i>      | Gene body                  |
| cg08671346 | 9  | 140,803,989 | <i>CACNA1B</i>   | Gene body                  |
| cg08678514 | 20 | 61,340,340  | <i>NTSR1</i>     | Gene body/5'UTR/1st exon   |
| cg08693140 | 7  | 6,653,510   | <i>N/A</i>       |                            |
| cg08699164 | 9  | 113,342,024 | <i>SVEP1</i>     | Gene body/5'UTR/1st exon   |
| cg08701550 | 2  | 169,890,994 | <i>N/A</i>       |                            |
| cg08735211 | 6  | 32,920,657  | <i>HLA-DMA</i>   | Gene body/1st intron       |
| cg08752062 | 2  | 183,164,357 | <i>PDE1A</i>     | Gene body/1st intron       |
| cg08764227 | 14 | 95,047,880  | <i>SERPINA5</i>  | Gene body/5'UTR/1st intron |
| cg08781681 | 10 | 131,840,772 | <i>N/A</i>       |                            |
| cg08815970 | 10 | 134,994,424 | <i>KNDC1</i>     | Gene body                  |
| cg08823359 | 4  | 108,641,437 | <i>PAPSS1</i>    | TSS200                     |
| cg08828787 | 7  | 42,031,896  | <i>GLI3</i>      | Gene body                  |
| cg08835992 | 11 | 7,870,404   | <i>OR5E1P</i>    | TSS200                     |
| cg08857994 | 2  | 130,763,641 | <i>N/A</i>       |                            |
| cg08858521 | 16 | 681,022     | <i>WFIKKN1</i>   | Gene body/5'UTR/1st exon   |
| cg08893901 | 20 | 47,201,949  | <i>N/A</i>       |                            |
| cg08894561 | 17 | 76,347,977  | <i>N/A</i>       |                            |
| cg08896757 | 20 | 38,457,541  | <i>N/A</i>       |                            |
| cg08912801 | 1  | 3,399,260   | <i>N/A</i>       |                            |
| cg08934077 | 7  | 90,453,412  | <i>CDK14</i>     | Gene body                  |
| cg08943645 | 14 | 60,191,308  | <i>RTNI</i>      | Gene body                  |
| cg08991373 | 1  | 214,892,809 | <i>N/A</i>       |                            |
| cg09050775 | 12 | 46,762,708  | <i>SLC38A2</i>   | Gene body                  |
| cg09060275 | 22 | 27,053,596  | <i>MIAT</i>      | Gene body/1st exon         |

|            |    |             |                     |                            |
|------------|----|-------------|---------------------|----------------------------|
| cg09080788 | 17 | 13,927,712  | <i>CDRT15P1</i>     | TSS200                     |
| cg09088836 | 6  | 2,510,144   | <i>N/A</i>          |                            |
| cg09100196 | 5  | 39,604,771  | <i>N/A</i>          |                            |
| cg09104457 | 20 | 38,224,920  | <i>N/A</i>          |                            |
| cg09126279 | 4  | 40,675,171  | <i>N/A</i>          |                            |
| cg09162992 | 11 | 126,273,065 | <i>ST3GAL4</i>      | TSS1500                    |
| cg09190656 | 6  | 32,363,212  | <i>BTNL2</i>        | Gene body                  |
| cg09232790 | 9  | 128,819,840 | <i>N/A</i>          |                            |
| cg09249339 | 3  | 29,831,289  | <i>RBMS3</i>        | Gene body                  |
| cg09295209 | 3  | 181,160,290 | <i>LOC102724604</i> | TSS200                     |
| cg09295573 | 4  | 37,245,514  | <i>NWD2</i>         | TSS1500                    |
| cg09314495 | 7  | 90,454,617  | <i>CDK14</i>        | Gene body                  |
| cg09321817 | 6  | 33,041,343  | <i>HLA-DPA1</i>     | Gene body/1st exon         |
| cg09337709 | 10 | 115,423,757 | <i>NRAP</i>         | Gene body/5'UTR/1st exon   |
| cg09344986 | 7  | 140,774,104 | <i>TMEM178B</i>     | Gene body/5'UTR/1st exon   |
| cg09350930 | 5  | 135,485,798 | <i>SMAD5</i>        | Gene body/5'UTR/1st intron |
| cg09357655 | 3  | 10,478,709  | <i>ATP2B2</i>       | Gene body                  |
| cg09369269 | 10 | 11,667,257  | <i>N/A</i>          |                            |
| cg09402943 | 16 | 18,939,180  | <i>SMG1</i>         | TSS1500                    |
| cg09404376 | 6  | 134,499,189 | <i>SGK1</i>         | TSS200                     |
| cg09413268 | 1  | 64,189,470  | <i>N/A</i>          |                            |
| cg09449235 | 6  | 108,766,787 | <i>AFG1L</i>        | Gene body                  |
| cg09456260 | 5  | 134,356,061 | <i>N/A</i>          |                            |
| cg09478243 | 5  | 168,405,226 | <i>SLIT3</i>        | Gene body                  |
| cg09533758 | 1  | 223,432,389 | <i>SUSD4</i>        | Gene body                  |
| cg09556515 | 16 | 85,470,485  | <i>N/A</i>          |                            |
| cg09575532 | 3  | 43,221,763  | <i>N/A</i>          |                            |
| cg09627057 | 3  | 15,377,670  | <i>SH3BP5</i>       | Gene body/5'UTR/1st intron |
| cg09639725 | 10 | 134,901,294 | <i>ADGRA1</i>       | TSS1500                    |
| cg09664118 | 12 | 89,769,621  | <i>N/A</i>          |                            |
| cg09788762 | 1  | 3,334,101   | <i>PRDM16</i>       | Gene body                  |
| cg09825979 | 7  | 27,179,432  | <i>HOXA-AS3</i>     | TSS1500                    |
| cg09832276 | 14 | 63,121,958  | <i>N/A</i>          |                            |
| cg09851981 | 3  | 121,453,622 | <i>GOLGB1</i>       | Gene body/5'UTR/1st intron |
| cg09876992 | 22 | 42,470,868  | <i>FAM109B</i>      | Gene body/5'UTR/1st intron |
| cg09893588 | 20 | 61,340,109  | <i>NTSR1</i>        | TSS200                     |
| cg09893827 | 3  | 35,763,087  | <i>ARPP21</i>       | Gene body                  |
| cg09894655 | 2  | 132,430,151 | <i>N/A</i>          |                            |
| cg09918318 | 17 | 1,824,386   | <i>N/A</i>          |                            |
| cg09952002 | 17 | 46,640,774  | <i>HOXB3</i>        | Gene body/5'UTR/1st intron |
| cg09988111 | 16 | 71,759,364  | <i>PHLPP2</i>       | TSS1500                    |
| cg10012422 | 11 | 121,139,309 | <i>N/A</i>          |                            |
| cg10017626 | 2  | 65,085,243  | <i>LINC01800</i>    | Gene body/1st intron       |
| cg10032269 | 14 | 62,547,769  | <i>SYT16</i>        | Gene body                  |
| cg10040669 | 8  | 9,010,317   | <i>PPP1R3B</i>      | TSS1500                    |
| cg10085849 | 3  | 80,839,313  | <i>N/A</i>          |                            |
| cg10122574 | 16 | 89,028,783  | <i>CBFA2T3</i>      | Gene body/1st intron       |
| cg10139430 | 11 | 64,728,252  | <i>MAJIN</i>        | Gene body/5'UTR/1st intron |
| cg10198171 | 18 | 77,569,776  | <i>N/A</i>          |                            |
| cg10255237 | 12 | 90,150,622  | <i>N/A</i>          |                            |
| cg10260470 | 2  | 227,555,897 | <i>N/A</i>          |                            |
| cg10297617 | 14 | 91,610,405  | <i>DGLUCY</i>       | Gene body/5'UTR/1st intron |
| cg10309886 | 20 | 57,407,747  | <i>GNAS-ASI</i>     | Gene body                  |
| cg10325478 | 14 | 88,793,021  | <i>KCNK10</i>       | Gene body/5'UTR/1st exon   |
| cg10329351 | 19 | 16,254,282  | <i>HSH2D</i>        | TSS200                     |
| cg10359304 | 14 | 85,911,161  | <i>N/A</i>          |                            |



|            |    |             |                     |                            |
|------------|----|-------------|---------------------|----------------------------|
| cg10409077 | 21 | 47,168,157  | <i>PCBP3</i>        | Gene body/5'UTR/1st intron |
| cg10459387 | 3  | 180,319,718 | <i>TTC14</i>        | TSS200                     |
| cg10482632 | 1  | 201,476,606 | <i>CSRP1</i>        | TSS1500                    |
| cg10515232 | 2  | 240,062,353 | <i>HDAC4</i>        | Gene body                  |
| cg10525372 | 6  | 112,375,333 | <i>WISP3</i>        | TSS200                     |
| cg10538440 | 21 | 38,117,682  | <i>SIM2</i>         | Gene body                  |
| cg10554126 | 16 | 30,851,519  | <i>BCL7C</i>        | Gene body                  |
| cg10625601 | 14 | 71,867,919  | <i>SIPA1L1</i>      | Gene body/5'UTR            |
| cg10628201 | 22 | 21,977,597  | <i>UBE2L3</i>       | Gene body                  |
| cg10634322 | 9  | 22,079,858  | <i>CDKN2B-AS1</i>   | Gene body                  |
| cg10654659 | 18 | 67,430,073  | <i>DOK6</i>         | Gene body                  |
| cg10682566 | 5  | 127,033,878 | <i>N/A</i>          |                            |
| cg10706649 | 11 | 65,064,139  | <i>POLA2</i>        | Gene body                  |
| cg10712491 | 7  | 1,610,757   | <i>PSMG3-AS1</i>    | Gene body/1st intron       |
| cg10719144 | 3  | 29,182,931  | <i>N/A</i>          |                            |
| cg10727229 | 4  | 6,635,485   | <i>N/A</i>          |                            |
| cg10727673 | 3  | 136,537,267 | <i>SLC35G2</i>      | TSS1500                    |
| cg10728351 | 4  | 122,628,020 | <i>N/A</i>          |                            |
| cg10814646 | 21 | 38,117,644  | <i>SIM2</i>         | Gene body                  |
| cg10861596 | 1  | 112,017,031 | <i>C1orf162</i>     | Gene body/5'UTR/1st intron |
| cg10864680 | 13 | 108,922,274 | <i>TNFSF13B</i>     | Gene body/1st exon         |
| cg10946404 | 8  | 59,575,772  | <i>N/A</i>          |                            |
| cg10972155 | 5  | 118,373,307 | <i>LOC105379143</i> | Gene body/1st intron       |
| cg10991752 | 6  | 155,845,314 | <i>LOC105378068</i> | Gene body                  |
| cg10996039 | 7  | 27,178,861  | <i>HOXA-AS3</i>     | TSS1500                    |
| cg11005692 | 4  | 1,595,294   | <i>N/A</i>          |                            |
| cg11040735 | 14 | 56,845,236  | <i>N/A</i>          |                            |
| cg11043718 | 12 | 113,489,002 | <i>N/A</i>          |                            |
| cg11134825 | 1  | 90,185,796  | <i>N/A</i>          |                            |
| cg11204152 | 14 | 72,638,695  | <i>RGS6</i>         | Gene body                  |
| cg11230866 | 6  | 150,400,090 | <i>N/A</i>          |                            |
| cg11234449 | 7  | 43,402,521  | <i>HECW1</i>        | Gene body                  |
| cg11262850 | 5  | 154,071,158 | <i>N/A</i>          |                            |
| cg11320208 | 5  | 167,157,167 | <i>TENM2</i>        | Gene body                  |
| cg11397668 | 8  | 71,100,641  | <i>NCOA2</i>        | Gene body                  |
| cg11449128 | 6  | 13,874,574  | <i>N/A</i>          |                            |
| cg11523618 | 2  | 169,944,632 | <i>DHRS9</i>        | Gene body                  |
| cg11536940 | 8  | 97,658,076  | <i>CPQ</i>          | Gene body/5'UTR/1st intron |
| cg11578213 | 6  | 144,636,859 | <i>UTRN</i>         | Gene body/1st intron       |
| cg11601297 | 19 | 41,224,147  | <i>ITPKC</i>        | Gene body/1st exon         |
| cg11618935 | 21 | 15,669,681  | <i>ABCC13</i>       | Gene body                  |
| cg11623216 | 8  | 125,274,098 | <i>N/A</i>          |                            |
| cg11637139 | 6  | 113,852,032 | <i>N/A</i>          |                            |
| cg11660970 | 2  | 241,232,802 | <i>N/A</i>          |                            |
| cg11669841 | 15 | 45,612,859  | <i>N/A</i>          |                            |
| cg11686154 | 13 | 22,040,483  | <i>N/A</i>          |                            |
| cg11724567 | 3  | 17,984,472  | <i>N/A</i>          |                            |
| cg11742646 | 10 | 129,611,529 | <i>N/A</i>          |                            |
| cg11760748 | 6  | 127,440,780 | <i>RSPO3</i>        | Gene body/1st intron       |
| cg11800117 | 11 | 93,270,375  | <i>SMCO4</i>        | Gene body/5'UTR/1st intron |
| cg11809091 | 5  | 140,552,105 | <i>PCDHB7</i>       | TSS200                     |
| cg11830461 | 20 | 49,039,858  | <i>N/A</i>          |                            |
| cg11832722 | 18 | 28,623,060  | <i>DSC3</i>         | TSS1500                    |
| cg11872370 | 21 | 43,869,658  | <i>N/A</i>          |                            |
| cg11880466 | 2  | 40,588,281  | <i>SLC8A1</i>       | Gene body/1st intron       |
| cg11899325 | 20 | 42,012,650  | <i>N/A</i>          |                            |

|            |    |             |                     |                            |
|------------|----|-------------|---------------------|----------------------------|
| cg11909912 | 17 | 43,974,919  | <i>MAPT-IT1</i>     | Gene body/1st exon         |
| cg11911679 | 2  | 182,520,919 | <i>CERKL</i>        | Gene body/1st intron       |
| cg11982176 | 13 | 114,054,286 | <i>LOC101928841</i> | Gene body/3'UTR            |
| cg12009872 | 15 | 51,520,739  | <i>CYP19A1</i>      | Gene body                  |
| cg12015737 | 7  | 27,184,030  | <i>HOXA5</i>        | TSS1500                    |
| cg12042598 | 2  | 74,097,426  | <i>STAMBP</i>       | Gene body                  |
| cg12054833 | 6  | 30,059,588  | <i>N/A</i>          |                            |
| cg12065750 | 2  | 169,929,133 | <i>DHRS9</i>        | Gene body/5'UTR/1st exon   |
| cg12090729 | 21 | 38,117,064  | <i>SIM2</i>         | Gene body                  |
| cg12146699 | 3  | 17,987,505  | <i>N/A</i>          |                            |
| cg12178385 | 16 | 69,761,720  | <i>NQO1</i>         | TSS1500                    |
| cg12182186 | 6  | 125,420,338 | <i>N/A</i>          |                            |
| cg12190219 | 1  | 89,591,466  | <i>GBP2</i>         | Gene body/5'UTR/1st intron |
| cg12199172 | 4  | 24,034,516  | <i>PPARGCIA</i>     | Gene body                  |
| cg12244594 | 8  | 37,650,963  | <i>N/A</i>          |                            |
| cg12250896 | 10 | 134,001,112 | <i>DPYSL4</i>       | Gene body/1st intron       |
| cg12303427 | 11 | 64,281,240  | <i>N/A</i>          |                            |
| cg12304937 | 7  | 680,013     | <i>PRKAR1B</i>      | Gene body                  |
| cg12342334 | 10 | 99,531,038  | <i>SFRP5</i>        | Gene body/1st intron       |
| cg12389346 | 4  | 1,215,112   | <i>CTBP1</i>        | Gene body                  |
| cg12411992 | 11 | 107,859,214 | <i>N/A</i>          |                            |
| cg12429049 | 14 | 97,585,663  | <i>N/A</i>          |                            |
| cg12439472 | 13 | 43,565,399  | <i>EPSTH1</i>       | Gene body/1st intron       |
| cg12503797 | 9  | 133,748,519 | <i>ABL1</i>         | Gene body                  |
| cg12523408 | 1  | 59,483,605  | <i>N/A</i>          |                            |
| cg12524307 | 14 | 75,765,352  | <i>N/A</i>          |                            |
| cg12531709 | 5  | 33,834,545  | <i>ADAMTS12</i>     | Gene body                  |
| cg12595335 | 6  | 164,159,736 | <i>N/A</i>          |                            |
| cg12612082 | 20 | 44,634,212  | <i>N/A</i>          |                            |
| cg12647478 | 1  | 158,979,481 | <i>IFI16</i>        | TSS200                     |
| cg12656085 | 2  | 85,173,360  | <i>N/A</i>          |                            |
| cg12667294 | 2  | 223,670,481 | <i>N/A</i>          |                            |
| cg12699286 | 12 | 54,394,194  | <i>HOXC9</i>        | Gene body/1st exon         |
| cg12742636 | 18 | 48,917,120  | <i>LINC01630</i>    | TSS1500                    |
| cg12744979 | 16 | 78,176,760  | <i>WWOX</i>         | Gene body                  |
| cg12750060 | 5  | 75,605,022  | <i>SV2C</i>         | Gene body                  |
| cg12776720 | 21 | 35,918,104  | <i>RCANI</i>        | Gene body/1st intron       |
| cg12791631 | 1  | 206,676,939 | <i>N/A</i>          |                            |
| cg12837343 | 15 | 61,026,728  | <i>RORA</i>         | Gene body/1st intron       |
| cg12847194 | 12 | 121,199,537 | <i>N/A</i>          |                            |
| cg12915421 | 3  | 28,615,891  | <i>LINC00693</i>    | TSS1500                    |
| cg12959840 | 11 | 104,906,152 | <i>CASP1</i>        | TSS1500                    |
| cg12969491 | 5  | 140,551,994 | <i>PCDHB7</i>       | TSS1500                    |
| cg12973294 | 4  | 119,869,807 | <i>SYNPO2</i>       | Gene body/1st intron       |
| cg13012649 | 16 | 1,682,232   | <i>CRAMP1</i>       | Gene body                  |
| cg13029130 | 2  | 68,593,246  | <i>PLEK</i>         | Gene body/1st intron       |
| cg13036107 | 18 | 2,857,947   | <i>EMILIN2</i>      | Gene body                  |
| cg13053861 | 2  | 174,888,959 | <i>LINC01960</i>    | TSS1500                    |
| cg13071508 | 1  | 24,373,210  | <i>N/A</i>          |                            |
| cg13077359 | 5  | 76,512,781  | <i>PDE8B</i>        | Gene body/1st intron       |
| cg13079837 | 12 | 1,104,452   | <i>ERC1</i>         | Gene body/1st intron       |
| cg13085141 | 10 | 29,280,409  | <i>N/A</i>          |                            |
| cg13110775 | 5  | 32,028,055  | <i>PDZD2</i>        | Gene body                  |
| cg13145081 | 11 | 106,045,732 | <i>N/A</i>          |                            |
| cg13157669 | 8  | 124,585,573 | <i>N/A</i>          |                            |
| cg13193239 | 4  | 111,539,479 | <i>PITX2</i>        | Gene body                  |

|            |    |             |                   |                            |
|------------|----|-------------|-------------------|----------------------------|
| cg13217675 | 13 | 48,796,797  | <i>N/A</i>        |                            |
| cg13250654 | 12 | 84,274,211  | <i>N/A</i>        |                            |
| cg13279009 | 2  | 24,584,023  | <i>ITSN2</i>      | TSS1500                    |
| cg13289490 | 6  | 134,965,825 | <i>N/A</i>        |                            |
| cg13373589 | 6  | 10,416,034  | <i>TFAP2A</i>     | TSS1500                    |
| cg13382148 | 3  | 189,655,457 | <i>N/A</i>        |                            |
| cg13410764 | 9  | 90,407,888  | <i>N/A</i>        |                            |
| cg13434669 | 1  | 77,013,304  | <i>ST6GALNAC3</i> | Gene body                  |
| cg13509677 | 20 | 23,625,546  | <i>N/A</i>        |                            |
| cg13638427 | 6  | 29,617,320  | <i>N/A</i>        |                            |
| cg13668339 | 3  | 67,704,244  | <i>SUCLG2</i>     | Gene body/1st intron       |
| cg13677144 | 19 | 57,683,885  | <i>N/A</i>        |                            |
| cg13682333 | 9  | 37,938,667  | <i>SHB</i>        | Gene body                  |
| cg13712012 | 2  | 40,165,558  | <i>SLC8A1-ASI</i> | Gene body                  |
| cg13723431 | 5  | 1,444,395   | <i>SLC6A3</i>     | Gene body/5'UTR/1st intron |
| cg13724732 | 2  | 53,731,598  | <i>N/A</i>        |                            |
| cg13726458 | 22 | 18,319,904  | <i>MICAL3</i>     | Gene body                  |
| cg13736376 | 4  | 111,539,291 | <i>PITX2</i>      | Gene body                  |
| cg13778274 | 9  | 132,478,358 | <i>PRRX2-ASI</i>  | Gene body/1st intron       |
| cg13799365 | 13 | 107,070,218 | <i>N/A</i>        |                            |
| cg13834146 | 15 | 77,927,305  | <i>LINGO1</i>     | Gene body/5'UTR            |
| cg13840922 | 7  | 98,258,974  | <i>NPTX2</i>      | Gene body/3'UTR            |
| cg13862597 | 20 | 34,865,432  | <i>N/A</i>        |                            |
| cg13868604 | 20 | 42,875,931  | <i>GDAP1L1</i>    | Gene body/5'UTR/1st exon   |
| cg13901526 | 2  | 127,414,455 | <i>GYPC</i>       | Gene body/1st intron       |
| cg13966005 | 9  | 136,127,999 | <i>N/A</i>        |                            |
| cg13972557 | 5  | 116,075,820 | <i>N/A</i>        |                            |
| cg14001664 | 2  | 132,088,801 | <i>N/A</i>        |                            |
| cg14014955 | 7  | 27,183,701  | <i>HOXA5</i>      | TSS1500                    |
| cg14035807 | 2  | 237,233,067 | <i>IQCA1</i>      | Gene body/3'UTR            |
| cg14058329 | 7  | 27,183,946  | <i>HOXA5</i>      | TSS1500                    |
| cg14060417 | 12 | 112,746,621 | <i>HECTD4</i>     | Gene body                  |
| cg14083593 | 5  | 30,969,240  | <i>N/A</i>        |                            |
| cg14137166 | 22 | 50,979,665  | <i>N/A</i>        |                            |
| cg14137723 | 16 | 85,211,190  | <i>N/A</i>        |                            |
| cg14151776 | 2  | 238,647,283 | <i>LRRFIP1</i>    | Gene body                  |
| cg14153983 | 20 | 38,454,845  | <i>N/A</i>        |                            |
| cg14156084 | 10 | 134,303,899 | <i>N/A</i>        |                            |
| cg14186321 | 2  | 151,544,796 | <i>N/A</i>        |                            |
| cg14223474 | 1  | 1,902,224   | <i>CFAP74</i>     | Gene body                  |
| cg14233709 | 18 | 56,457,387  | <i>N/A</i>        |                            |
| cg14241509 | 4  | 6,196,512   | <i>JAKMIP1</i>    | TSS200                     |
| cg14247325 | 13 | 36,501,687  | <i>DCLK1</i>      | Gene body                  |
| cg14253965 | 17 | 66,379,662  | <i>ARSG</i>       | Gene body                  |
| cg14264125 | 7  | 158,512,597 | <i>N/A</i>        |                            |
| cg14289511 | 16 | 24,682,446  | <i>LINC01567</i>  | TSS200                     |
| cg14313499 | 11 | 60,272,341  | <i>MS4A12</i>     | Gene body                  |
| cg14328771 | 2  | 100,091,472 | <i>REV1</i>       | Gene body/5'UTR/1st intron |
| cg14363105 | 3  | 42,889,519  | <i>ACKR2</i>      | Gene body/5'UTR            |
| cg14367702 | 16 | 71,599,554  | <i>TAT-ASI</i>    | TSS200                     |
| cg14382067 | 4  | 123,819,585 | <i>NUDT6</i>      | Gene body                  |
| cg14384616 | 2  | 53,356,820  | <i>N/A</i>        |                            |
| cg14406681 | 4  | 88,480,717  | <i>N/A</i>        |                            |
| cg14407420 | 8  | 97,172,958  | <i>GDF6</i>       | Gene body/5'UTR/1st exon   |
| cg14417329 | 17 | 80,186,273  | <i>SLC16A3</i>    | TSS200                     |
| cg14417782 | 2  | 151,023,084 | <i>N/A</i>        |                            |

|            |    |             |                   |                          |
|------------|----|-------------|-------------------|--------------------------|
| cg14451007 | 12 | 13,320,358  | <i>N/A</i>        |                          |
| cg14452619 | 9  | 8,627,950   | <i>PTPRD</i>      | Gene body                |
| cg14465044 | 19 | 55,699,363  | <i>PTPRH</i>      | Gene body                |
| cg14487665 | 9  | 140,408,634 | <i>PNPLA7</i>     | Gene body                |
| cg14529767 | 18 | 53,664,618  | <i>N/A</i>        |                          |
| cg14536682 | 3  | 18,025,303  | <i>LOC339862</i>  | Gene body/1st intron     |
| cg14563948 | 2  | 38,827,464  | <i>HNRNPLL</i>    | Gene body/1st intron     |
| cg14573826 | 14 | 65,409,667  | <i>GPX2</i>       | TSS200                   |
| cg14576521 | 15 | 38,342,180  | <i>LINC02345</i>  | Gene body                |
| cg14578879 | 6  | 100,904,055 | <i>SIMI</i>       | Gene body/1st intron     |
| cg14631834 | 18 | 28,623,040  | <i>DSC3</i>       | TSS1500                  |
| cg14654468 | 17 | 80,186,336  | <i>SLC16A3</i>    | Gene body/5'UTR/1st exon |
| cg14663510 | 10 | 124,895,461 | <i>HMX3</i>       | TSS200                   |
| cg14685756 | 3  | 29,052,113  | <i>N/A</i>        |                          |
| cg14690837 | 12 | 92,464,984  | <i>LINC01619</i>  | Gene body/1st intron     |
| cg14696728 | 3  | 188,149,653 | <i>LPP</i>        | Gene body                |
| cg14725084 | 9  | 88,661,279  | <i>GOLM1</i>      | Gene body                |
| cg14726699 | 6  | 80,123,379  | <i>N/A</i>        |                          |
| cg14762973 | 2  | 187,714,068 | <i>ZSWIM2</i>     | TSS200                   |
| cg14797042 | 16 | 57,865,112  | <i>N/A</i>        |                          |
| cg14815361 | 5  | 131,589,552 | <i>N/A</i>        |                          |
| cg14887620 | 18 | 53,501,191  | <i>N/A</i>        |                          |
| cg14899065 | 15 | 81,587,108  | <i>IL16</i>       | Gene body                |
| cg14900295 | 10 | 135,050,901 | <i>VENTX</i>      | TSS1500                  |
| cg14905466 | 6  | 134,499,143 | <i>SGK1</i>       | TSS200                   |
| cg14984781 | 17 | 31,867      | <i>DOC2B</i>      | TSS1500                  |
| cg14990808 | 6  | 28,493,651  | <i>GPX5</i>       | TSS200                   |
| cg14992219 | 5  | 117,964,718 | <i>N/A</i>        |                          |
| cg15013177 | 3  | 1,134,366   | <i>CNTN6</i>      | Gene body/5'UTR/1st exon |
| cg15062377 | 1  | 200,004,205 | <i>NR5A2</i>      | Gene body/1st intron     |
| cg15089387 | 5  | 110,406,661 | <i>TSLP</i>       | TSS1500                  |
| cg15115365 | 5  | 88,384,656  | <i>MEF2C-AS1</i>  | Gene body                |
| cg15140902 | 6  | 21,667,815  | <i>CASC15</i>     | Gene body/1st intron     |
| cg15189254 | 12 | 97,417,550  | <i>N/A</i>        |                          |
| cg15209133 | 14 | 70,020,151  | <i>N/A</i>        |                          |
| cg15239403 | 16 | 57,865,096  | <i>N/A</i>        |                          |
| cg15254954 | 19 | 8,420,745   | <i>N/A</i>        |                          |
| cg15261545 | 12 | 91,311,768  | <i>LINC00615</i>  | TSS200                   |
| cg15267091 | 2  | 121,246,618 | <i>N/A</i>        |                          |
| cg15276815 | 10 | 133,918,387 | <i>JAKMIP3</i>    | Gene body                |
| cg15320998 | 7  | 148,936,039 | <i>ZNF212</i>     | TSS1500                  |
| cg15324996 | 3  | 187,693,346 | <i>LINC01991</i>  | Gene body/1st intron     |
| cg15329552 | 15 | 79,973,958  | <i>N/A</i>        |                          |
| cg15454523 | 1  | 96,119,430  | <i>N/A</i>        |                          |
| cg15456082 | 14 | 59,444,979  | <i>LINC01500</i>  | Gene body                |
| cg15460297 | 20 | 43,356,937  | <i>KCNK15-AS1</i> | Gene body                |
| cg15550065 | 5  | 1,849,566   | <i>N/A</i>        |                          |
| cg15557489 | 17 | 59,228,220  | <i>BCAS3</i>      | Gene body                |
| cg15564095 | 3  | 29,728,824  | <i>RBMS3</i>      | Gene body                |
| cg15574437 | 7  | 2,019,874   | <i>MAD1L1</i>     | Gene body                |
| cg15601371 | 7  | 578,938     | <i>N/A</i>        |                          |
| cg15601807 | 10 | 45,495,677  | <i>ZNF22</i>      | TSS1500                  |
| cg15622015 | 3  | 187,166,771 | <i>LINC02041</i>  | Gene body                |
| cg15622672 | 5  | 43,008,217  | <i>N/A</i>        |                          |
| cg15625301 | 5  | 143,348,111 | <i>N/A</i>        |                          |
| cg15629871 | 17 | 73,082,980  | <i>SLC16A5</i>    | TSS1500                  |

|            |    |             |                     |                            |
|------------|----|-------------|---------------------|----------------------------|
| cg15633912 | 10 | 3,179,703   | <i>N/A</i>          |                            |
| cg15642438 | 20 | 3,057,581   | <i>N/A</i>          |                            |
| cg15654121 | 1  | 34,630,944  | <i>CSMD2</i>        | TSS200                     |
| cg15700636 | 11 | 57,156,050  | <i>PRG2</i>         | Gene body                  |
| cg15706568 | 22 | 49,447,845  | <i>N/A</i>          |                            |
| cg15718287 | 13 | 36,702,658  | <i>DCLK1</i>        | Gene body/5'UTR/1st intron |
| cg15803018 | 11 | 45,744,972  | <i>LOC100507384</i> | Gene body/1st intron       |
| cg15829092 | 13 | 113,498,188 | <i>ATP11A</i>       | Gene body                  |
| cg15833353 | 5  | 33,807,278  | <i>ADAMTS12</i>     | Gene body                  |
| cg15838148 | 10 | 28,700,847  | <i>N/A</i>          |                            |
| cg15851696 | 2  | 183,183,274 | <i>PDE1A</i>        | Gene body/1st intron       |
| cg15859790 | 19 | 5,477,143   | <i>N/A</i>          |                            |
| cg15867494 | 9  | 87,026,795  | <i>N/A</i>          |                            |
| cg15901029 | 2  | 225,107,381 | <i>N/A</i>          |                            |
| cg16046444 | 1  | 200,004,265 | <i>NR5A2</i>        | Gene body/1st intron       |
| cg16046937 | 10 | 133,997,159 | <i>JAKMIP3</i>      | Gene body/3'UTR            |
| cg16047117 | 22 | 42,470,063  | <i>FAM109B</i>      | TSS200                     |
| cg16059943 | 1  | 2,013,748   | <i>PRKCZ</i>        | Gene body/5'UTR/1st intron |
| cg16062681 | 16 | 52,946,868  | <i>N/A</i>          |                            |
| cg16066235 | 6  | 164,169,838 | <i>N/A</i>          |                            |
| cg16066354 | 22 | 39,417,451  | <i>APOBEC3D</i>     | Gene body/5'UTR/1st exon   |
| cg16099024 | 18 | 34,201,130  | <i>FHOD3</i>        | Gene body                  |
| cg16112226 | 11 | 126,310,323 | <i>KIRREL3</i>      | Gene body                  |
| cg16121807 | 13 | 111,980,494 | <i>TEX29</i>        | Gene body                  |
| cg16141411 | 9  | 112,622,039 | <i>PALM2-AKAP2</i>  | Gene body/1st intron       |
| cg16158513 | 6  | 164,124,190 | <i>N/A</i>          |                            |
| cg16162536 | 1  | 3,824,447   | <i>LINC01134</i>    | Gene body                  |
| cg16162930 | 1  | 9,341,141   | <i>N/A</i>          |                            |
| cg16178271 | 7  | 1,948,755   | <i>MAD1L1</i>       | Gene body                  |
| cg16178832 | 8  | 143,623,661 | <i>ADGRB1</i>       | Gene body                  |
| cg16224106 | 17 | 62,710,156  | <i>N/A</i>          |                            |
| cg16245261 | 11 | 6,342,357   | <i>CAVIN3</i>       | TSS1500                    |
| cg16320165 | 3  | 6,823,049   | <i>GRM7-AS3</i>     | Gene body                  |
| cg16357582 | 1  | 201,476,557 | <i>CSRPI</i>        | TSS200                     |
| cg16363250 | 1  | 59,034,842  | <i>N/A</i>          |                            |
| cg16393606 | 3  | 194,803,972 | <i>XXYLT1</i>       | Gene body                  |
| cg16442618 | 18 | 53,527,652  | <i>N/A</i>          |                            |
| cg16457692 | 14 | 63,734,568  | <i>RHOJ</i>         | Gene body/1st intron       |
| cg16490124 | 1  | 235,292,369 | <i>TOMM20</i>       | TSS200                     |
| cg16505783 | 17 | 10,641,077  | <i>TMEM220-AS1</i>  | Gene body                  |
| cg16524353 | 5  | 33,766,324  | <i>ADAMTS12</i>     | Gene body                  |
| cg16555304 | 4  | 7,387,443   | <i>SORCS2</i>       | Gene body/1st intron       |
| cg16586056 | 17 | 70,073,623  | <i>LINC02097</i>    | Gene body                  |
| cg16588056 | 5  | 122,614,190 | <i>N/A</i>          |                            |
| cg16617372 | 12 | 121,199,483 | <i>N/A</i>          |                            |
| cg16711285 | 19 | 51,829,721  | <i>IGLON5</i>       | Gene body                  |
| cg16725262 | 13 | 36,444,273  | <i>DCLK1</i>        | Gene body                  |
| cg16740427 | 22 | 42,469,976  | <i>FAM109B</i>      | TSS1500                    |
| cg16746274 | 14 | 51,424,212  | <i>N/A</i>          |                            |
| cg16757620 | 7  | 98,760,442  | <i>N/A</i>          |                            |
| cg16777413 | 5  | 138,211,013 | <i>LRRTM2</i>       | Gene body/5'UTR/1st exon   |
| cg16788857 | 3  | 192,577,951 | <i>MB21D2</i>       | Gene body/1st intron       |
| cg16814689 | 3  | 29,194,061  | <i>N/A</i>          |                            |
| cg16836719 | 22 | 47,146,104  | <i>N/A</i>          |                            |
| cg16840609 | 15 | 51,397,257  | <i>TNFAIP8L3</i>    | Gene body/1st exon         |
| cg16865953 | 2  | 66,808,261  | <i>LINC01798</i>    | Gene body/1st intron       |

|            |    |             |                     |                            |
|------------|----|-------------|---------------------|----------------------------|
| cg16877957 | 5  | 140,529,672 | <i>PCDHB6</i>       | Gene body/5'UTR/1st exon   |
| cg17081805 | 20 | 23,512,037  | <i>CST13P</i>       | Gene body                  |
| cg17102948 | 8  | 18,953,748  | <i>N/A</i>          |                            |
| cg17108958 | 1  | 221,129,545 | <i>N/A</i>          |                            |
| cg17133295 | 4  | 178,501,843 | <i>N/A</i>          |                            |
| cg17177779 | 17 | 40,588,642  | <i>N/A</i>          |                            |
| cg17180237 | 1  | 119,545,275 | <i>LOC105378933</i> | TSS1500                    |
| cg17211649 | 2  | 183,230,801 | <i>PDE1A</i>        | Gene body/1st intron       |
| cg17239019 | 7  | 41,091,424  | <i>N/A</i>          |                            |
| cg17263206 | 5  | 154,071,247 | <i>N/A</i>          |                            |
| cg17263323 | 4  | 5,238,459   | <i>STK32B</i>       | Gene body                  |
| cg17291798 | 22 | 30,221,200  | <i>ASCC2</i>        | Gene body                  |
| cg17315014 | 5  | 138,211,155 | <i>CTNNA1</i>       | Gene body/5'UTR/1st exon   |
| cg17379886 | 20 | 21,490,515  | <i>N/A</i>          |                            |
| cg17380244 | 2  | 183,458,286 | <i>N/A</i>          |                            |
| cg17381727 | 1  | 59,347,406  | <i>LINC01135</i>    | Gene body/1st intron       |
| cg17388157 | 2  | 169,928,097 | <i>DHRS9</i>        | TSS1500                    |
| cg17415216 | 20 | 38,413,520  | <i>N/A</i>          |                            |
| cg17445666 | 19 | 38,183,255  | <i>ZNF781</i>       | TSS200                     |
| cg17467517 | 2  | 1,670,835   | <i>PXDN</i>         | Gene body                  |
| cg17473093 | 20 | 37,262,698  | <i>ARHGAP40</i>     | Gene body                  |
| cg17474338 | 6  | 28,733,950  | <i>N/A</i>          |                            |
| cg17489610 | 7  | 12,027,903  | <i>N/A</i>          |                            |
| cg17544585 | 17 | 65,406,098  | <i>PITPNC1</i>      | Gene body/1st intron       |
| cg17558788 | 1  | 235,091,608 | <i>N/A</i>          |                            |
| cg17612071 | 20 | 16,555,142  | <i>KIF16B</i>       | TSS1500                    |
| cg17616554 | 7  | 117,119,611 | <i>CFTR</i>         | TSS1500                    |
| cg17639493 | 11 | 124,055,283 | <i>OR10D3</i>       | TSS1500                    |
| cg17660183 | 12 | 105,065,386 | <i>CHST11</i>       | Gene body                  |
| cg17750772 | 6  | 135,046,253 | <i>N/A</i>          |                            |
| cg17753390 | 5  | 170,109,085 | <i>LOC105377716</i> | TSS1500                    |
| cg17763553 | 8  | 18,953,483  | <i>N/A</i>          |                            |
| cg17775899 | 7  | 27,179,426  | <i>HOXA-AS3</i>     | TSS1500                    |
| cg17823973 | 4  | 23,958,624  | <i>PPARGC1A</i>     | Gene body                  |
| cg17834964 | 6  | 115,965,443 | <i>LINC02534</i>    | TSS1500                    |
| cg17857241 | 22 | 19,016,820  | <i>DGCR5</i>        | Gene body                  |
| cg17865103 | 7  | 106,649,408 | <i>N/A</i>          |                            |
| cg17904797 | 1  | 34,333,326  | <i>CSMD2-AS1</i>    | TSS1500                    |
| cg17932058 | 3  | 170,628,899 | <i>N/A</i>          |                            |
| cg17967996 | 10 | 21,187,652  | <i>NEBL</i>         | TSS1500                    |
| cg18010348 | 11 | 129,154,745 | <i>N/A</i>          |                            |
| cg18011382 | 18 | 53,361,589  | <i>N/A</i>          |                            |
| cg18034674 | 8  | 136,935,437 | <i>N/A</i>          |                            |
| cg18041642 | 17 | 62,062,565  | <i>N/A</i>          |                            |
| cg18048341 | 15 | 48,043,013  | <i>SEMA6D</i>       | Gene body/5'UTR/1st intron |
| cg18072282 | 22 | 37,976,192  | <i>LGALS2</i>       | TSS200                     |
| cg18100008 | 7  | 42,001,744  | <i>GLI3</i>         | Gene body/3'UTR            |
| cg18107094 | 8  | 110,020,924 | <i>N/A</i>          |                            |
| cg18107890 | 5  | 127,676,746 | <i>FBN2</i>         | Gene body                  |
| cg18113757 | 12 | 12,596,653  | <i>BORCS5</i>       | Gene body                  |
| cg18132208 | 1  | 61,707,412  | <i>NFIA</i>         | Gene body                  |
| cg18169505 | 4  | 1,021,236   | <i>N/A</i>          |                            |
| cg18177548 | 2  | 226,329,535 | <i>NYAP2</i>        | Gene body                  |
| cg18257582 | 1  | 113,822,522 | <i>N/A</i>          |                            |
| cg18282393 | 2  | 111,788,355 | <i>ACOXL</i>        | Gene body                  |
| cg18295201 | 3  | 193,807,511 | <i>N/A</i>          |                            |

|            |    |             |                  |                            |
|------------|----|-------------|------------------|----------------------------|
| cg18303533 | 5  | 157,702,687 | <i>N/A</i>       |                            |
| cg18321810 | 14 | 59,436,794  | <i>LINC01500</i> | Gene body                  |
| cg18331539 | 6  | 167,069,389 | <i>RPS6KA2</i>   | Gene body                  |
| cg18363918 | 19 | 51,829,984  | <i>IGLON5</i>    | Gene body                  |
| cg18392494 | 7  | 68,000,377  | <i>N/A</i>       |                            |
| cg18397770 | 6  | 116,772,693 | <i>N/A</i>       |                            |
| cg18424635 | 6  | 32,490,421  | <i>HLA-DRB5</i>  | Gene body/1st intron       |
| cg18445292 | 11 | 68,610,381  | <i>CPT1A</i>     | TSS1500                    |
| cg18458509 | 11 | 2,920,189   | <i>SLC22A18</i>  | TSS1500                    |
| cg18466213 | 17 | 65,117,644  | <i>HELZ</i>      | Gene body                  |
| cg18519255 | 5  | 158,122,512 | <i>N/A</i>       |                            |
| cg18547326 | 17 | 45,282,523  | <i>N/A</i>       |                            |
| cg18574425 | 12 | 88,188,861  | <i>LINC02258</i> | Gene body                  |
| cg18579796 | 11 | 13,371,358  | <i>ARNTL</i>     | Gene body/5'UTR            |
| cg18674234 | 14 | 78,107,677  | <i>N/A</i>       |                            |
| cg18702684 | 5  | 157,702,593 | <i>N/A</i>       |                            |
| cg18703238 | 13 | 108,922,361 | <i>TNFSF13B</i>  | Gene body/1st exon         |
| cg18705065 | 10 | 127,445,197 | <i>EDRF1</i>     | Gene body                  |
| cg18705861 | 15 | 44,718,396  | <i>CTDSPL2</i>   | TSS1500                    |
| cg18712566 | 13 | 112,239,346 | <i>N/A</i>       |                            |
| cg18716912 | 4  | 57,861,927  | <i>POLR2B</i>    | Gene body                  |
| cg18723737 | 8  | 81,489,559  | <i>N/A</i>       |                            |
| cg18725573 | 20 | 62,368,956  | <i>LIME1</i>     | Gene body                  |
| cg18739977 | 11 | 126,273,187 | <i>ST3GAL4</i>   | TSS200                     |
| cg18747561 | 7  | 12,624,860  | <i>SCIN</i>      | Gene body                  |
| cg18750086 | 7  | 140,774,161 | <i>TMEM178B</i>  | Gene body/1st exon         |
| cg18781968 | 3  | 29,805,756  | <i>RBMS3</i>     | Gene body                  |
| cg18856925 | 20 | 62,555,227  | <i>DNAJC5</i>    | Gene body/5'UTR/1st intron |
| cg18865080 | 11 | 21,263,031  | <i>NELL1</i>     | Gene body                  |
| cg18926734 | 14 | 72,918,217  | <i>RGS6</i>      | Gene body                  |
| cg18928066 | 1  | 45,279,037  | <i>BTBD19</i>    | Gene body                  |
| cg18929240 | 7  | 788,908     | <i>DNAAF5</i>    | Gene body                  |
| cg18976212 | 2  | 53,868,889  | <i>N/A</i>       |                            |
| cg19017142 | 2  | 64,431,245  | <i>LINC00309</i> | Gene body/1st exon         |
| cg19033079 | 10 | 134,980,508 | <i>KNDCC1</i>    | Gene body/1st intron       |
| cg19034132 | 10 | 75,692,227  | <i>N/A</i>       |                            |
| cg19035612 | 7  | 90,668,636  | <i>CDK14</i>     | Gene body                  |
| cg19080261 | 1  | 64,087,567  | <i>PGM1</i>      | TSS1500                    |
| cg19095219 | 19 | 54,219,749  | <i>MIR521-2</i>  | TSS200                     |
| cg19151402 | 20 | 51,825,316  | <i>TSHZ2</i>     | Gene body/1st intron       |
| cg19154950 | 1  | 22,740,395  | <i>N/A</i>       |                            |
| cg19157948 | 4  | 84,551,343  | <i>N/A</i>       |                            |
| cg19241619 | 11 | 20,761,811  | <i>NELL1</i>     | Gene body                  |
| cg19260967 | 5  | 97,100,719  | <i>N/A</i>       |                            |
| cg19284918 | 7  | 106,359,216 | <i>N/A</i>       |                            |
| cg19304891 | 7  | 117,205,433 | <i>CFTR-AS1</i>  | TSS1500                    |
| cg19343783 | 2  | 166,981,698 | <i>SCN1A</i>     | Gene body/5'UTR/1st intron |
| cg19350357 | 2  | 152,118,835 | <i>RBM43</i>     | TSS1500                    |
| cg19414708 | 3  | 58,163,924  | <i>N/A</i>       |                            |
| cg19417526 | 11 | 131,895,599 | <i>NTM</i>       | Gene body/1st intron       |
| cg19499496 | 3  | 56,468,862  | <i>ERC2</i>      | Gene body                  |
| cg19561408 | 4  | 175,383,368 | <i>N/A</i>       |                            |
| cg19563130 | 14 | 81,422,098  | <i>TSHR</i>      | Gene body/1st exon         |
| cg19567035 | 10 | 112,220,496 | <i>N/A</i>       |                            |
| cg19577646 | 5  | 144,923,747 | <i>N/A</i>       |                            |
| cg19580930 | 5  | 114,750,644 | <i>N/A</i>       |                            |

|            |    |             |                    |                            |
|------------|----|-------------|--------------------|----------------------------|
| cg19599293 | 3  | 158,113,451 | <i>RSRC1</i>       | Gene body                  |
| cg19666287 | 13 | 45,945,197  | <i>TPT1-AS1</i>    | Gene body                  |
| cg19668500 | 1  | 64,087,627  | <i>PGM1</i>        | TSS1500                    |
| cg19694458 | 7  | 788,847     | <i>DNAAF5</i>      | Gene body                  |
| cg19704102 | 3  | 42,121,737  | <i>N/A</i>         |                            |
| cg19707454 | 7  | 6,616,677   | <i>ZDHHC4</i>      | TSS1500                    |
| cg19712474 | 5  | 33,712,618  | <i>ADAMTS12</i>    | Gene body                  |
| cg19725343 | 19 | 51,830,960  | <i>IGLON5</i>      | Gene body                  |
| cg19753864 | 2  | 38,320,028  | <i>N/A</i>         |                            |
| cg19789466 | 12 | 113,344,923 | <i>OAS1</i>        | Gene body/1st exon         |
| cg19796174 | 14 | 66,973,431  | <i>GPHN</i>        | TSS1500                    |
| cg19800069 | 11 | 20,650,115  | <i>SLC6A5</i>      | Gene body                  |
| cg19804071 | 6  | 112,375,186 | <i>WISP3</i>       | TSS200                     |
| cg19804889 | 3  | 29,691,496  | <i>RBMS3</i>       | Gene body                  |
| cg19818072 | 2  | 186,321,297 | <i>N/A</i>         |                            |
| cg19909453 | 5  | 146,299,975 | <i>PPP2R2B-IT1</i> | TSS1500                    |
| cg19911821 | 12 | 99,923,873  | <i>ANKS1B</i>      | Gene body                  |
| cg19930620 | 3  | 7,340,148   | <i>GRM7</i>        | Gene body                  |
| cg19977280 | 22 | 39,416,827  | <i>APOBEC3D</i>    | TSS1500                    |
| cg19981226 | 12 | 123,927,263 | <i>N/A</i>         |                            |
| cg19982971 | 7  | 151,652,172 | <i>GALNTL5</i>     | TSS1500                    |
| cg20002156 | 14 | 63,132,577  | <i>N/A</i>         |                            |
| cg20007255 | 7  | 144,539,872 | <i>N/A</i>         |                            |
| cg20100745 | 8  | 134,307,728 | <i>NDRG1</i>       | Gene body/5'UTR/1st intron |
| cg20112357 | 2  | 169,925,953 | <i>DHRS9</i>       | Gene body/1st intron       |
| cg20127743 | 8  | 23,718,644  | <i>N/A</i>         |                            |
| cg20134484 | 2  | 151,023,387 | <i>N/A</i>         |                            |
| cg20137415 | 10 | 133,945,044 | <i>JAKMIP3</i>     | Gene body                  |
| cg20138077 | 18 | 53,587,802  | <i>LINC01416</i>   | TSS1500                    |
| cg20152430 | 17 | 46,641,504  | <i>HOXB3</i>       | Gene body/5'UTR/1st intron |
| cg20162381 | 12 | 3,310,097   | <i>TSPAN9</i>      | Gene body/5'UTR            |
| cg20170271 | 22 | 38,034,681  | <i>SH3BP1</i>      | TSS1500                    |
| cg20207544 | 2  | 85,641,438  | <i>CAPG</i>        | TSS1500                    |
| cg20291436 | 4  | 111,539,352 | <i>PITX2</i>       | Gene body                  |
| cg20312012 | 2  | 97,331,035  | <i>FERIL5</i>      | Gene body                  |
| cg20344326 | 6  | 137,736,599 | <i>N/A</i>         |                            |
| cg20361960 | 4  | 145,038,318 | <i>GYPA</i>        | Gene body                  |
| cg20434152 | 1  | 7,120,926   | <i>CAMTA1</i>      | Gene body                  |
| cg20457051 | 6  | 47,668,044  | <i>ADGRF4</i>      | Gene body/5'UTR/1st intron |
| cg20468999 | 18 | 77,569,970  | <i>N/A</i>         |                            |
| cg20503108 | 4  | 88,638,684  | <i>N/A</i>         |                            |
| cg20517050 | 7  | 27,183,806  | <i>HOXA5</i>       | TSS1500                    |
| cg20533291 | 22 | 43,269,058  | <i>PACSLN2</i>     | Gene body                  |
| cg20546601 | 10 | 18,622,965  | <i>CACNB2</i>      | Gene body/1st intron       |
| cg20685672 | 2  | 181,987,552 | <i>LINC01934</i>   | TSS1500                    |
| cg20734219 | 5  | 146,453,021 | <i>PPP2R2B</i>     | Gene body/5'UTR            |
| cg20749955 | 8  | 9,009,401   | <i>PPP1R3B</i>     | TSS1500                    |
| cg20754476 | 11 | 71,117,679  | <i>FLJ42102</i>    | Gene body                  |
| cg20817131 | 7  | 27,184,167  | <i>HOXA5</i>       | TSS1500                    |
| cg20919278 | 20 | 38,408,099  | <i>N/A</i>         |                            |
| cg20947470 | 3  | 50,232,343  | <i>GNAT1</i>       | Gene body                  |
| cg20986366 | 10 | 29,586,729  | <i>LYZL1</i>       | Gene body                  |
| cg21007646 | 9  | 89,100,521  | <i>N/A</i>         |                            |
| cg21010458 | 6  | 13,527,018  | <i>N/A</i>         |                            |
| cg21016778 | 15 | 65,805,260  | <i>DPP8</i>        | Gene body                  |
| cg21038220 | 5  | 140,551,968 | <i>PCDHB7</i>      | TSS1500                    |



|            |    |             |                  |                            |
|------------|----|-------------|------------------|----------------------------|
| cg21061821 | 9  | 97,878,487  | <i>FANCC</i>     | Gene body                  |
| cg21063332 | 2  | 95,682,920  | <i>N/A</i>       |                            |
| cg21070860 | 3  | 154,719,649 | <i>N/A</i>       |                            |
| cg21076026 | 16 | 71,599,556  | <i>TAT-AS1</i>   | TSS200                     |
| cg21077839 | 6  | 45,404,765  | <i>RUNX2</i>     | Gene body                  |
| cg21102109 | 1  | 166,049,171 | <i>FAM78B</i>    | Gene body/1st intron       |
| cg21108188 | 5  | 33,833,466  | <i>ADAMTS12</i>  | Gene body                  |
| cg21141297 | 3  | 28,878,014  | <i>N/A</i>       |                            |
| cg21178201 | 12 | 91,616,993  | <i>N/A</i>       |                            |
| cg21192344 | 3  | 28,941,830  | <i>N/A</i>       |                            |
| cg21233879 | 17 | 1,824,602   | <i>N/A</i>       |                            |
| cg21345207 | 6  | 126,189,172 | <i>NCOA7</i>     | Gene body                  |
| cg21406479 | 14 | 86,074,156  | <i>FLRT2</i>     | Gene body/5'UTR/1st intron |
| cg21464903 | 8  | 41,220,059  | <i>N/A</i>       |                            |
| cg21494379 | 5  | 88,275,243  | <i>MEF2C-AS1</i> | Gene body                  |
| cg21503297 | 3  | 157,824,510 | <i>SHOX2</i>     | TSS1500                    |
| cg21504345 | 13 | 36,505,140  | <i>DCLK1</i>     | Gene body                  |
| cg21524461 | 12 | 20,525,478  | <i>PDE3A</i>     | Gene body                  |
| cg21599943 | 17 | 50,467,356  | <i>LINC01982</i> | TSS1500                    |
| cg21603744 | 8  | 110,020,783 | <i>N/A</i>       |                            |
| cg21659576 | 17 | 47,467,409  | <i>N/A</i>       |                            |
| cg21694873 | 3  | 45,451,677  | <i>LARS2</i>     | Gene body                  |
| cg21756765 | 22 | 33,402,998  | <i>SYN3</i>      | TSS200                     |
| cg21824985 | 15 | 39,155,660  | <i>N/A</i>       |                            |
| cg21844536 | 15 | 41,030,153  | <i>RMDN3</i>     | Gene body                  |
| cg21932786 | 14 | 97,132,572  | <i>N/A</i>       |                            |
| cg22083684 | 7  | 100,425,827 | <i>EPHB4</i>     | TSS1500                    |
| cg22101354 | 11 | 126,273,124 | <i>ST3GAL4</i>   | TSS200                     |
| cg22117893 | 13 | 114,212,078 | <i>N/A</i>       |                            |
| cg22147748 | 11 | 71,117,753  | <i>FLJ42102</i>  | Gene body                  |
| cg22156842 | 3  | 136,537,169 | <i>SLC35G2</i>   | TSS1500                    |
| cg22175764 | 20 | 56,803,964  | <i>ANKRD60</i>   | TSS1500                    |
| cg22234419 | 3  | 145,875,907 | <i>PLOD2</i>     | Gene body/1st intron       |
| cg22256354 | 8  | 131,554,148 | <i>N/A</i>       |                            |
| cg22273893 | 13 | 77,962,057  | <i>N/A</i>       |                            |
| cg22307471 | 11 | 21,166,228  | <i>NELL1</i>     | Gene body                  |
| cg22388608 | 6  | 49,917,254  | <i>DEFB133</i>   | TSS200                     |
| cg22393436 | 1  | 168,489,851 | <i>N/A</i>       |                            |
| cg22473616 | 5  | 1,357,161   | <i>N/A</i>       |                            |
| cg22488650 | 5  | 31,030,027  | <i>N/A</i>       |                            |
| cg22499381 | 1  | 11,024,967  | <i>C1orf127</i>  | Gene body                  |
| cg22510139 | 1  | 3,058,822   | <i>PRDM16</i>    | Gene body/1st intron       |
| cg22549408 | 18 | 57,566,300  | <i>PMAIP1</i>    | TSS1500                    |
| cg22556090 | 19 | 2,688,621   | <i>GNG7</i>      | Gene body/5'UTR/1st intron |
| cg22568351 | 1  | 109,203,853 | <i>HENMT1</i>    | TSS200                     |
| cg22645316 | 2  | 150,850,819 | <i>N/A</i>       |                            |
| cg22694630 | 15 | 78,921,707  | <i>CHRNB4</i>    | Gene body                  |
| cg22720822 | 1  | 87,253,977  | <i>N/A</i>       |                            |
| cg22784386 | 6  | 100,903,817 | <i>SIM1</i>      | Gene body/1st intron       |
| cg22784898 | 19 | 4,237,215   | <i>EBI3</i>      | Gene body/3'UTR            |
| cg22810271 | 20 | 37,899,981  | <i>N/A</i>       |                            |
| cg22827063 | 2  | 66,809,119  | <i>LINC01798</i> | Gene body/1st intron       |
| cg22833307 | 10 | 133,368,972 | <i>N/A</i>       |                            |
| cg22834147 | 3  | 158,189,615 | <i>RSRC1</i>     | Gene body                  |
| cg22839123 | 10 | 73,157,611  | <i>CDH23</i>     | Gene body/5'UTR/1st intron |
| cg22885278 | 5  | 43,007,847  | <i>N/A</i>       |                            |

|            |    |             |                     |                            |
|------------|----|-------------|---------------------|----------------------------|
| cg22889142 | 19 | 58,862,398  | <i>AIBG-ASI</i>     | TSS1500                    |
| cg22922632 | 2  | 40,165,857  | <i>SLC8A1-ASI</i>   | Gene body                  |
| cg22935562 | 12 | 23,252,116  | <i>N/A</i>          |                            |
| cg22958588 | 2  | 158,864,111 | <i>UPP2</i>         | Gene body/1st intron       |
| cg22964496 | 10 | 126,718,276 | <i>CTBP2</i>        | Gene body                  |
| cg23055518 | 8  | 30,656,033  | <i>PPP2CB</i>       | Gene body                  |
| cg23062652 | 20 | 19,909,136  | <i>RIN2</i>         | Gene body/1st intron       |
| cg23084705 | 18 | 57,566,328  | <i>PMAIP1</i>       | TSS1500                    |
| cg23132669 | 1  | 205,216,617 | <i>TMCC2</i>        | Gene body/1st intron       |
| cg23159970 | 12 | 2,690,385   | <i>CACNAIC</i>      | Gene body                  |
| cg23172712 | 6  | 134,589,516 | <i>SGK1</i>         | Gene body/1st intron       |
| cg23181800 | 1  | 243,958,230 | <i>AKT3</i>         | Gene body/1st intron       |
| cg23189276 | 4  | 37,245,916  | <i>NWD2</i>         | TSS1500                    |
| cg23199815 | 5  | 177,371,597 | <i>LOC100128340</i> | Gene body/1st intron       |
| cg23204968 | 7  | 27,183,816  | <i>HOXA5</i>        | TSS1500                    |
| cg23258678 | 1  | 200,004,095 | <i>NR5A2</i>        | Gene body/1st intron       |
| cg23303108 | 8  | 23,083,578  | <i>LOC389641</i>    | Gene body/1st exon         |
| cg23332689 | 4  | 987,652     | <i>SLC26A1</i>      | TSS1500                    |
| cg23358840 | 2  | 177,025,418 | <i>N/A</i>          |                            |
| cg23420995 | 13 | 36,708,219  | <i>N/A</i>          |                            |
| cg23427404 | 10 | 29,546,610  | <i>N/A</i>          |                            |
| cg23454797 | 7  | 27,183,990  | <i>HOXA5</i>        | TSS1500                    |
| cg23463494 | 16 | 29,832,769  | <i>MVP</i>          | Gene body/5'UTR/1st intron |
| cg23480730 | 14 | 33,402,027  | <i>N/A</i>          |                            |
| cg23533267 | 11 | 120,942,758 | <i>TBCEL</i>        | Gene body                  |
| cg23535596 | 6  | 10,416,090  | <i>TFAP2A</i>       | TSS1500                    |
| cg23540632 | 18 | 67,253,448  | <i>DOK6</i>         | Gene body                  |
| cg23542902 | 3  | 193,807,749 | <i>N/A</i>          |                            |
| cg23578629 | 20 | 38,196,954  | <i>N/A</i>          |                            |
| cg23595172 | 11 | 12,116,797  | <i>N/A</i>          |                            |
| cg23601861 | 11 | 20,887,013  | <i>NELL1</i>        | Gene body                  |
| cg23606713 | 10 | 131,724,754 | <i>EBF3</i>         | Gene body                  |
| cg23631909 | 6  | 137,736,680 | <i>N/A</i>          |                            |
| cg23649822 | 3  | 70,313,410  | <i>N/A</i>          |                            |
| cg23724027 | 6  | 139,284,923 | <i>REPS1</i>        | Gene body/1st intron       |
| cg23736693 | 10 | 64,305,644  | <i>ZNF365</i>       | Gene body/5'UTR/1st intron |
| cg23759778 | 10 | 63,150,889  | <i>N/A</i>          |                            |
| cg23777197 | 5  | 88,361,885  | <i>MEF2C-ASI</i>    | Gene body                  |
| cg23875404 | 13 | 36,728,869  | <i>N/A</i>          |                            |
| cg23888021 | 12 | 132,908,418 | <i>N/A</i>          |                            |
| cg23897302 | 14 | 103,393,970 | <i>AMN</i>          | Gene body                  |
| cg23921342 | 1  | 34,630,923  | <i>CSMD2</i>        | TSS200                     |
| cg23962293 | 11 | 104,262,061 | <i>N/A</i>          |                            |
| cg23975326 | 16 | 75,625,311  | <i>N/A</i>          |                            |
| cg23994112 | 17 | 75,373,457  | <i>9-Sep</i>        | Gene body/5'UTR/1st intron |
| cg24044052 | 2  | 231,191,662 | <i>SP140L</i>       | TSS1500                    |
| cg24056452 | 18 | 22,211,573  | <i>LINC01915</i>    | Gene body/1st intron       |
| cg24100957 | 1  | 244,090,303 | <i>LOC339529</i>    | Gene body/1st intron       |
| cg24155190 | 1  | 201,476,619 | <i>CSRPI</i>        | TSS1500                    |
| cg24191621 | 1  | 168,361,624 | <i>N/A</i>          |                            |
| cg24252656 | 4  | 20,884,321  | <i>KCNIP4</i>       | Gene body/1st exon         |
| cg24278165 | 8  | 23,083,551  | <i>LOC389641</i>    | Gene body/1st exon         |
| cg24292597 | 18 | 34,268,862  | <i>FHOD3</i>        | Gene body                  |
| cg24293739 | 14 | 95,624,621  | <i>DICER1</i>       | TSS1500                    |
| cg24321598 | 3  | 29,892,325  | <i>RBMS3</i>        | Gene body                  |
| cg24353213 | 1  | 90,308,620  | <i>LRRC8D</i>       | Gene body/5'UTR/1st intron |

|            |    |             |                  |                            |
|------------|----|-------------|------------------|----------------------------|
| cg24360871 | 7  | 27,163,929  | <i>HOXA-AS2</i>  | Gene body                  |
| cg24377694 | 20 | 1,975,372   | <i>PDYN</i>      | TSS1500                    |
| cg24421410 | 6  | 32,920,220  | <i>HLA-DMA</i>   | Gene body/1st intron       |
| cg24422188 | 6  | 134,499,086 | <i>SGKI</i>      | TSS200                     |
| cg24507742 | 19 | 47,288,244  | <i>SLC1A5</i>    | TSS200                     |
| cg24569492 | 2  | 66,808,811  | <i>LINC01798</i> | Gene body/1st intron       |
| cg24577711 | 3  | 28,882,435  | <i>N/A</i>       |                            |
| cg24617723 | 2  | 187,714,003 | <i>ZSWIM2</i>    | TSS200                     |
| cg24617884 | 20 | 38,659,074  | <i>N/A</i>       |                            |
| cg24619709 | 7  | 128,580,694 | <i>IRF5</i>      | TSS200                     |
| cg24648930 | 2  | 118,814,005 | <i>N/A</i>       |                            |
| cg24653772 | 7  | 788,989     | <i>DNAAF5</i>    | Gene body                  |
| cg24667405 | 11 | 27,495,393  | <i>LGR4</i>      | TSS1500                    |
| cg24711324 | 19 | 356,086     | <i>N/A</i>       |                            |
| cg24745500 | 4  | 88,728,805  | <i>IBSP</i>      | Gene body                  |
| cg24756378 | 14 | 33,401,638  | <i>N/A</i>       |                            |
| cg24771104 | 1  | 223,406,962 | <i>SUSD4</i>     | Gene body                  |
| cg24794697 | 3  | 18,278,987  | <i>LOC339862</i> | Gene body                  |
| cg24797417 | 16 | 57,210,113  | <i>FAM192A</i>   | Gene body/5'UTR            |
| cg24800373 | 4  | 7,794,646   | <i>AFAP1</i>     | Gene body                  |
| cg24837277 | 3  | 28,721,439  | <i>LINC00693</i> | Gene body                  |
| cg24855007 | 12 | 116,482,191 | <i>MED13L</i>    | Gene body                  |
| cg24892524 | 11 | 32,312,649  | <i>N/A</i>       |                            |
| cg24902920 | 6  | 10,416,373  | <i>TFAP2A</i>    | TSS1500                    |
| cg24914848 | 2  | 53,385,253  | <i>N/A</i>       |                            |
| cg24947737 | 20 | 48,950,655  | <i>N/A</i>       |                            |
| cg24972369 | 14 | 63,654,012  | <i>N/A</i>       |                            |
| cg25004838 | 6  | 32,112,189  | <i>N/A</i>       |                            |
| cg25019274 | 11 | 19,298,668  | <i>N/A</i>       |                            |
| cg25033405 | 8  | 48,610,943  | <i>SPIDR</i>     | Gene body                  |
| cg25064552 | 1  | 153,938,859 | <i>SLC39A1</i>   | Gene body/5'UTR/1st intron |
| cg25066845 | 5  | 115,949,876 | <i>N/A</i>       |                            |
| cg25103185 | 10 | 13,657,902  | <i>PRPF18</i>    | Gene body                  |
| cg25220320 | 15 | 98,065,740  | <i>LINC02254</i> | TSS1500                    |
| cg25230363 | 7  | 30,951,425  | <i>AQP1</i>      | Gene body/5'UTR/1st exon   |
| cg25286012 | 1  | 153,329,061 | <i>S100A9</i>    | TSS1500                    |
| cg25295723 | 10 | 134,789,042 | <i>LINC01168</i> | Gene body                  |
| cg25307665 | 7  | 27,183,694  | <i>HOXA5</i>     | TSS1500                    |
| cg25370920 | 5  | 96,016,596  | <i>CAST</i>      | Gene body                  |
| cg25402047 | 3  | 42,857,681  | <i>ACKR2</i>     | Gene body/5'UTR/1st intron |
| cg25414209 | 13 | 36,785,834  | <i>SOHLH2</i>    | Gene body/1st intron       |
| cg25414605 | 11 | 67,182,672  | <i>CARNS1</i>    | TSS1500                    |
| cg25466245 | 1  | 223,407,095 | <i>SUSD4</i>     | Gene body                  |
| cg25472174 | 11 | 55,904,782  | <i>OR8J3</i>     | Gene body/1st exon         |
| cg25476641 | 9  | 98,213,040  | <i>PTCH1</i>     | Gene body                  |
| cg25495396 | 6  | 39,032,080  | <i>GLPIR</i>     | Gene body                  |
| cg25518276 | 11 | 64,728,559  | <i>MAJIN</i>     | Gene body/5'UTR/1st intron |
| cg25541103 | 11 | 126,273,135 | <i>ST3GAL4</i>   | TSS200                     |
| cg25550323 | 11 | 117,694,062 | <i>FXYD2</i>     | Gene body/1st intron       |
| cg25577463 | 10 | 135,050,619 | <i>VENTX</i>     | TSS1500                    |
| cg25587511 | 3  | 155,422,782 | <i>PLCH1</i>     | TSS1500                    |
| cg25632577 | 8  | 128,048,403 | <i>N/A</i>       |                            |
| cg25634507 | 8  | 59,413,577  | <i>CYP7A1</i>    | TSS1500                    |
| cg25636468 | 3  | 88,088,021  | <i>N/A</i>       |                            |
| cg25655096 | 12 | 6,745,292   | <i>LPAR5</i>     | Gene body/5'UTR/1st exon   |
| cg25656709 | 6  | 107,193,903 | <i>LINC02532</i> | Gene body/1st intron       |

|            |    |             |                     |                            |
|------------|----|-------------|---------------------|----------------------------|
| cg25669190 | 3  | 187,071,023 | <i>N/A</i>          |                            |
| cg25742326 | 1  | 901,449     | <i>PLEKHN1</i>      | TSS1500                    |
| cg25951430 | 11 | 57,192,432  | <i>SLC43A3</i>      | Gene body                  |
| cg25951717 | 2  | 232,349,118 | <i>N/A</i>          |                            |
| cg25989400 | 1  | 18,386,994  | <i>N/A</i>          |                            |
| cg25992219 | 19 | 2,714,922   | <i>DIRAS1</i>       | Gene body/3'UTR            |
| cg26013408 | 18 | 59,058,288  | <i>CDH20</i>        | Gene body/5'UTR/1st intron |
| cg26023912 | 7  | 27,184,369  | <i>HOXA5</i>        | TSS1500                    |
| cg26039479 | 18 | 19,137,760  | <i>ESCO1</i>        | Gene body                  |
| cg26055299 | 13 | 77,934,615  | <i>N/A</i>          |                            |
| cg26066724 | 14 | 104,355,829 | <i>N/A</i>          |                            |
| cg26090775 | 11 | 16,633,582  | <i>N/A</i>          |                            |
| cg26157694 | 8  | 103,401,045 | <i>UBR5</i>         | Gene body/1st intron       |
| cg26181372 | 9  | 104,198,262 | <i>ALDOB</i>        | TSS200                     |
| cg26203998 | 6  | 183,775     | <i>LOC285766</i>    | Gene body                  |
| cg26219664 | 19 | 511,526     | <i>TPGSI</i>        | Gene body/1st intron       |
| cg26294037 | 2  | 222,683,753 | <i>N/A</i>          |                            |
| cg26327119 | 7  | 135,662,711 | <i>MTPN</i>         | TSS1500                    |
| cg26369996 | 20 | 1,639,402   | <i>SIRPG</i>        | TSS1500                    |
| cg26380692 | 6  | 28,967,425  | <i>ZNF311</i>       | Gene body                  |
| cg26394775 | 6  | 10,416,529  | <i>TFAP2A</i>       | TSS1500                    |
| cg26395285 | 6  | 28,481,217  | <i>GPX6</i>         | Gene body/1st intron       |
| cg26400546 | 1  | 205,499,355 | <i>CDK18</i>        | Gene body                  |
| cg26434964 | 12 | 90,647,590  | <i>N/A</i>          |                            |
| cg26437826 | 5  | 76,936,361  | <i>N/A</i>          |                            |
| cg26442764 | 7  | 157,294,324 | <i>N/A</i>          |                            |
| cg26443127 | 10 | 31,987,230  | <i>N/A</i>          |                            |
| cg26528298 | 6  | 112,375,206 | <i>WISP3</i>        | TSS200                     |
| cg26530341 | 8  | 23,083,353  | <i>LOC389641</i>    | Gene body/1st exon         |
| cg26573683 | 7  | 101,575,514 | <i>CUX1</i>         | Gene body                  |
| cg26614943 | 6  | 134,499,390 | <i>SGK1</i>         | TSS1500                    |
| cg26645225 | 16 | 893,800     | <i>N/A</i>          |                            |
| cg26675625 | 12 | 92,540,776  | <i>LOC101928617</i> | Gene body                  |
| cg26680097 | 3  | 70,048,832  | <i>SAMMSON</i>      | TSS200                     |
| cg26690318 | 10 | 100,167,465 | <i>PYROXD2</i>      | Gene body                  |
| cg26708920 | 10 | 13,826,317  | <i>FRMD4A</i>       | Gene body                  |
| cg26713867 | 2  | 169,903,411 | <i>N/A</i>          |                            |
| cg26737223 | 17 | 74,488,855  | <i>RHBDF2</i>       | Gene body/5'UTR/1st intron |
| cg26746381 | 6  | 116,235,476 | <i>N/A</i>          |                            |
| cg26755141 | 6  | 100,903,839 | <i>SIMI</i>         | Gene body/1st intron       |
| cg26774791 | 3  | 125,352,108 | <i>N/A</i>          |                            |
| cg26779378 | 7  | 107,300,957 | <i>SLC26A4</i>      | TSS200                     |
| cg26787204 | 4  | 1,215,343   | <i>CTBP1</i>        | Gene body                  |
| cg26804381 | 2  | 222,475,282 | <i>N/A</i>          |                            |
| cg26817573 | 15 | 64,126,729  | <i>HERC1</i>        | TSS1500                    |
| cg26878870 | 5  | 124,080,713 | <i>ZNF608</i>       | Gene body/5'UTR/1st exon   |
| cg26928941 | 9  | 129,270,113 | <i>N/A</i>          |                            |
| cg26936989 | 14 | 92,410,260  | <i>FBLN5</i>        | Gene body/1st intron       |
| cg26956444 | 10 | 124,895,456 | <i>HMX3</i>         | TSS200                     |
| cg26964426 | 16 | 85,455,911  | <i>N/A</i>          |                            |
| cg26977633 | 17 | 6,660,650   | <i>XAF1</i>         | Gene body/5'UTR/1st intron |
| cg27012952 | 13 | 36,654,733  | <i>DCLK1</i>        | Gene body                  |
| cg27013085 | 15 | 91,158,861  | <i>CRTC3</i>        | Gene body                  |
| cg27022209 | 2  | 88,876,195  | <i>EIF2AK3</i>      | Gene body                  |
| cg27022584 | 17 | 79,071,378  | <i>BAIAP2</i>       | Gene body                  |
| cg27026002 | 3  | 18,250,414  | <i>LOC339862</i>    | Gene body                  |

|            |    |             |                  |                            |
|------------|----|-------------|------------------|----------------------------|
| cg27038271 | 6  | 127,440,803 | <i>RSPO3</i>     | Gene body/1st intron       |
| cg27109912 | 17 | 38,707,719  | <i>N/A</i>       |                            |
| cg27136927 | 5  | 172,161,264 | <i>N/A</i>       |                            |
| cg27226098 | 12 | 3,751,048   | <i>CRACR2A</i>   | Gene body                  |
| cg27245185 | 12 | 99,257,038  | <i>ANKS1B</i>    | Gene body/5'UTR/1st intron |
| cg27255388 | 9  | 97,431,719  | <i>N/A</i>       |                            |
| cg27283345 | 6  | 10,416,531  | <i>TFAP2A</i>    | TSS1500                    |
| cg27461254 | 20 | 39,135,472  | <i>N/A</i>       |                            |
| cg27466619 | 13 | 36,662,493  | <i>DCLK1</i>     | Gene body                  |
| cg27509292 | 2  | 232,652,098 | <i>COPS7B</i>    | Gene body/5'UTR/1st intron |
| cg27510065 | 17 | 70,031,543  | <i>LINC01152</i> | Gene body/1st intron       |
| cg27510214 | 20 | 38,478,179  | <i>N/A</i>       |                            |
| cg27554123 | 6  | 34,714,788  | <i>N/A</i>       |                            |
| cg27587095 | 2  | 240,062,186 | <i>HDAC4</i>     | Gene body                  |
| cg27610486 | 10 | 135,050,842 | <i>VENTX</i>     | TSS1500                    |
| cg27618398 | 13 | 36,733,080  | <i>N/A</i>       |                            |
| cg27648075 | 18 | 28,622,876  | <i>DSC3</i>      | TSS200                     |
| cg27662838 | 14 | 21,510,479  | <i>RNASE7</i>    | Gene body/5'UTR/1st exon   |
| rs1019916  | 6  | 34,714,788  | <i>N/A</i>       |                            |

<sup>a</sup>Probe ID of the Infinium MethylationEPIC BeadChip. <sup>b</sup>National Center for Biotechnology Information (NCBI) database (Genome Build 37). <sup>c</sup>*N/A*, not annotated (designed for the intergenic regions). <sup>d</sup>Probe CpG sites were annotated as (a) from 200 bp upstream of the transcription start site (TSS) to 1500 bp upstream of it (TSS1500), (b) from TSS to 200 bp upstream of TSS (TSS200), (c) the 5' untranslated region (UTR), (d) the first exon, (e) the first intron, (f) the gene body (TSS to transcription termination site), (g) the 3' UTR and (h) the intergenic region based on the RefSeq database (<http://www.ncbi.nlm.nih.gov/refseq/>).
