# Supplementary material for: Genome-wide DNA methylation profile of early-onset endometrial cancer: its correlation with genetic aberrations and comparison with late-onset endometrial cancer
Source: PubMed Central journal article supplement — Carcinogenesis. 2019 Mar 9;40(5):611–23. doi: 10.1093/carcin/bgz046 (PMC6610171; doi:10.1093/carcin/bgz046), 2019-03-09
Supplement: bgz046_suppl_supplementary_table_s8a.pdf [file bgz046_suppl_supplementary_table_s8a.pdf]

**Supplementary Table 8A.** Correlation between epigenetic clustering of patients with endometrial endometrioid cancer based on DNA methylation profile and clinicopathological parameters.

| Clinicopathological parameters                                                             | Year, body mass index (BMI) and number of patients |           | P value <sup>c</sup>         |
|--------------------------------------------------------------------------------------------|----------------------------------------------------|-----------|------------------------------|
|                                                                                            | A (n=58)                                           | B (n=16)  |                              |
| Patients Age                                                                               |                                                    |           |                              |
| Median                                                                                     | 49                                                 | 38        | <u>8.58×10<sup>-3d</sup></u> |
| Interquartile range                                                                        | 27-77                                              | 23-50     |                              |
| BMI                                                                                        |                                                    |           |                              |
| Median                                                                                     | 21.6                                               | 24.1      | 0.84 <sup>d</sup>            |
| Interquartile range                                                                        | 12.7-36.5                                          | 14.8-31.2 |                              |
| Histological grading <sup>a</sup>                                                          |                                                    |           |                              |
| G1 to G2                                                                                   | 47                                                 | 16        | 0.11 <sup>e</sup>            |
| G3                                                                                         | 11                                                 | 0         |                              |
| Myometrial invasion                                                                        |                                                    |           |                              |
| Less than 1/2                                                                              | 40                                                 | 13        | 0.53 <sup>e</sup>            |
| 1/2 or more                                                                                | 18                                                 | 3         |                              |
| Lymph vessel invasion                                                                      |                                                    |           |                              |
| Absent                                                                                     | 30                                                 | 14        | <u>0.01<sup>e</sup></u>      |
| Present                                                                                    | 28                                                 | 2         |                              |
| Cervical invasion                                                                          |                                                    |           |                              |
| Absent                                                                                     | 52                                                 | 14        | 1.00 <sup>e</sup>            |
| Present                                                                                    | 6                                                  | 2         |                              |
| Adnexal invasion                                                                           |                                                    |           |                              |
| Absent                                                                                     | 52                                                 | 16        | 0.33 <sup>e</sup>            |
| Present                                                                                    | 6                                                  | 0         |                              |
| Lymph node metastasis                                                                      |                                                    |           |                              |
| Absent                                                                                     | 50                                                 | 15        | 0.67 <sup>e</sup>            |
| Present                                                                                    | 8                                                  | 1         |                              |
| Distant metastasis                                                                         |                                                    |           |                              |
| Absent                                                                                     | 56                                                 | 16        | 1.00 <sup>e</sup>            |
| Present                                                                                    | 2                                                  | 0         |                              |
| Peritoneal cytology                                                                        |                                                    |           |                              |
| Negative                                                                                   | 54                                                 | 16        | 0.57 <sup>e</sup>            |
| Positive                                                                                   | 4                                                  | 0         |                              |
| The International Federation of Gynecology and Obstetrics (FIGO) stage (2008) <sup>b</sup> |                                                    |           |                              |
| I to II                                                                                    | 47                                                 | 15        | 0.44 <sup>e</sup>            |
| III to IV                                                                                  | 11                                                 | 1         |                              |
| Reccurrence                                                                                |                                                    |           | 0.57 <sup>e</sup>            |
| Negative                                                                                   | 54                                                 | 16        |                              |
| Positive                                                                                   | 4                                                  | 0         |                              |
| Outcome                                                                                    |                                                    |           | 1.00 <sup>e</sup>            |
| Alive or death of other cause                                                              | 57                                                 | 16        |                              |
| Death of complication                                                                      | 1                                                  | 0         |                              |

<sup>a</sup>Histological grading of endometrial cancer was in accordance with the Tumor-Node-Metastasis classification (Ref.25). <sup>b</sup>FIGO stage was defined according to Ref.26.

<sup>c</sup>P values of <0.05 are underlined.

<sup>d</sup>Mann-Whitney U test.

<sup>e</sup>Fisher's exact test.
