# Supplementary material for: Genome-wide DNA methylation profile of early-onset endometrial cancer: its correlation with genetic aberrations and comparison with late-onset endometrial cancer
Source: PubMed Central journal article supplement — Carcinogenesis. 2019 Mar 9;40(5):611–23. doi: 10.1093/carcin/bgz046 (PMC6610171; doi:10.1093/carcin/bgz046), 2019-03-09
Supplement: bgz046_suppl_supplementary_table_s8b.pdf [file bgz046_suppl_supplementary_table_s8b.pdf]

**Supplementary Table 8B.** Correlation between epigenetic clustering of patients with early-onset endometrial endometrioid cancers (aged <40 yr) based on DNA methylation profile and clinicopathological parameters.

| Clinicopathological parameters                                                             | Year, body mass index (BMI) and number of patients |           | P value           |
|--------------------------------------------------------------------------------------------|----------------------------------------------------|-----------|-------------------|
|                                                                                            | EA (n=22)                                          | EB (n=12) |                   |
| Patients Age                                                                               |                                                    |           |                   |
| Median                                                                                     | 36                                                 | 38        | 0.47 <sup>c</sup> |
| Interquartile range                                                                        | 27-40                                              | 23-40     |                   |
| BMI                                                                                        |                                                    |           | 0.42 <sup>c</sup> |
| Median                                                                                     | 21                                                 | 24.1      |                   |
| Interquartile range                                                                        | 16.2-36.5                                          | 14.8-31.2 |                   |
| Histological grading <sup>a</sup>                                                          |                                                    |           |                   |
| G1 to G2                                                                                   | 16                                                 | 12        | 0.07 <sup>d</sup> |
| G3                                                                                         | 6                                                  | 0         |                   |
| Myometrial invasion                                                                        |                                                    |           |                   |
| Less than 1/2                                                                              | 19                                                 | 10        | 1.00 <sup>d</sup> |
| 1/2 or more                                                                                | 3                                                  | 2         |                   |
| Lymph vessel invasion                                                                      |                                                    |           |                   |
| Absent                                                                                     | 12                                                 | 10        | 0.14 <sup>d</sup> |
| Present                                                                                    | 10                                                 | 2         |                   |
| Cervical invasion                                                                          |                                                    |           |                   |
| Absent                                                                                     | 18                                                 | 10        | 1.00 <sup>d</sup> |
| Present                                                                                    | 4                                                  | 2         |                   |
| Adnexal invasion                                                                           |                                                    |           |                   |
| Absent                                                                                     | 18                                                 | 12        | 0.27 <sup>d</sup> |
| Present                                                                                    | 4                                                  | 0         |                   |
| Lymph node metastasis                                                                      |                                                    |           |                   |
| Absent                                                                                     | 18                                                 | 11        | 0.63 <sup>d</sup> |
| Present                                                                                    | 4                                                  | 1         |                   |
| Distant metastasis                                                                         |                                                    |           |                   |
| Absent                                                                                     | 21                                                 | 12        | 1.00 <sup>d</sup> |
| Present                                                                                    | 1                                                  | 0         |                   |
| Peritoneal cytology                                                                        |                                                    |           |                   |
| Negative                                                                                   | 19                                                 | 12        | 0.54 <sup>d</sup> |
| Positive                                                                                   | 3                                                  | 0         |                   |
| The International Federation of Gynecology and Obstetrics (FIGO) stage (2008) <sup>b</sup> |                                                    |           |                   |
| I to II                                                                                    | 16                                                 | 11        | 0.38 <sup>d</sup> |
| III to IV                                                                                  | 6                                                  | 1         |                   |
| Recurrence                                                                                 |                                                    |           | 1.00 <sup>d</sup> |
| Negative                                                                                   | 21                                                 | 12        |                   |
| Positive                                                                                   | 1                                                  | 0         |                   |
| Outcome                                                                                    |                                                    |           | 1.00 <sup>d</sup> |
| Alive or death of other cause                                                              | 22                                                 | 12        |                   |
| Death of complication                                                                      | 0                                                  | 0         |                   |

<sup>a</sup>Histological grading of endometrial cancer was in accordance with the Tumor-Node-Metastasis classification (Ref.25). <sup>b</sup>FIGO stage was defined according to Ref.26.

<sup>c</sup>Mann-Whitney U test.

<sup>d</sup>Fisher's exact test.
