# Supplementary material for: Genome-wide DNA methylation profile of early-onset endometrial cancer: its correlation with genetic aberrations and comparison with late-onset endometrial cancer
Source: PubMed Central journal article supplement — Carcinogenesis. 2019 Mar 9;40(5):611–23. doi: 10.1093/carcin/bgz046 (PMC6610171; doi:10.1093/carcin/bgz046), 2019-03-09
Supplement: bgz046_suppl_supplementary_table_s9a.pdf [file bgz046_suppl_supplementary_table_s9a.pdf]

**Supplementary Table 9A.** One hundred and one genes, for which the 255 probes belonging to Probe Cluster I and showing a significant ( $P < 0.05$ ) inverse correlation ( $r < -0.2$ ) between DNA methylation levels and mRNA expression levels in the endometrial cancer dataset deposited in The Cancer Genome Atlas database (<https://tcgadata.nci.nih.gov/tcga/>) were designed.

| Target ID <sup>a</sup> | Chromosome | Position <sup>b</sup> | Gene symbol <sup>c</sup> | Gene region <sup>d</sup> |
|------------------------|------------|-----------------------|--------------------------|--------------------------|
| cg00018606             | 2          | 208,989,425           | <i>CRYGD</i>             | TSS200                   |
| cg00154357             | 3          | 147,111,280           | <i>ZIC4</i>              | TSS1500                  |
| cg00235367             | 3          | 147,110,322           | <i>ZIC4</i>              | TSS200                   |
| cg00275741             | 5          | 140,261,749           | <i>PCDHA13</i>           | TSS200                   |
| cg00423153             | 2          | 229,046,785           | <i>SPHKAP</i>            | TSS1500                  |
| cg00548552             | 19         | 57,183,205            | <i>ZNF835</i>            | TSS200                   |
| cg00589371             | 18         | 63,417,783            | <i>CDH7</i>              | TSS200                   |
| cg00661523             | 3          | 151,985,426           | <i>MBNL1</i>             | TSS1500                  |
| cg00663077             | 4          | 188,916,709           | <i>ZFP42</i>             | TSS1500                  |
| cg00701946             | 2          | 54,087,200            | <i>GPR75</i>             | TSS200                   |
| cg00705992             | 7          | 27,226,329            | <i>HOXA11</i>            | TSS1500                  |
| cg00970622             | 1          | 1,294,362             | <i>MXRA8</i>             | TSS200                   |
| cg00983904             | 12         | 6,665,288             | <i>IFFO1</i>             | TSS200                   |
| cg00983956             | 19         | 58,220,669            | <i>ZNF154</i>            | TSS200                   |
| cg01268824             | 19         | 58,220,818            | <i>ZNF154</i>            | TSS1500                  |
| cg01285501             | 7          | 27,206,461            | <i>HOXA9</i>             | TSS1500                  |
| cg01344171             | 6          | 43,612,647            | <i>RSPH9</i>             | TSS200                   |
| cg01493517             | 12         | 6,665,447             | <i>IFFO1</i>             | TSS200                   |
| cg01560972             | 11         | 8,190,837             | <i>RIC3</i>              | TSS200                   |
| cg01581018             | 3          | 147,110,595           | <i>ZIC4</i>              | TSS1500                  |
| cg01635193             | 17         | 42,092,472            | <i>TMEM101</i>           | TSS200                   |
| cg01643203             | 1          | 161,171,336           | <i>NDUFS2</i>            | TSS1500                  |
| cg01979888             | 12         | 6,665,424             | <i>IFFO1</i>             | TSS200                   |
| cg02051771             | 5          | 140,261,663           | <i>PCDHA13</i>           | TSS200                   |
| cg02165355             | 5          | 178,368,071           | <i>ZNF454</i>            | TSS200                   |
| cg02362103             | 1          | 119,532,773           | <i>TBX15</i>             | TSS1500                  |
| cg02370605             | 18         | 63,417,776            | <i>CDH7</i>              | TSS200                   |
| cg02387803             | 3          | 147,123,457           | <i>ZIC4</i>              | TSS200                   |
| cg02401399             | 19         | 36,523,584            | <i>CLIP3</i>             | TSS200                   |
| cg02452944             | 5          | 140,810,109           | <i>PCDHGA12</i>          | TSS200                   |
| cg02536691             | 19         | 22,194,032            | <i>ZNF208</i>            | TSS1500                  |
| cg03043444             | 19         | 57,183,213            | <i>ZNF835</i>            | TSS200                   |
| cg03043789             | 2          | 176,981,138           | <i>HOXD10</i>            | TSS1500                  |
| cg03100639             | 16         | 31,483,137            | <i>TGFB111</i>           | TSS1500                  |
| cg03221247             | 1          | 219,347,458           | <i>LYPLAL1</i>           | TSS200                   |
| cg03234186             | 19         | 58,220,657            | <i>ZNF154</i>            | TSS200                   |

|            |    |             |                  |         |
|------------|----|-------------|------------------|---------|
| cg03464573 | 7  | 27,205,504  | <i>HOXA9</i>     | TSS1500 |
| cg03685124 | 1  | 66,999,148  | <i>SGIP1</i>     | TSS200  |
| cg03722888 | 3  | 37,033,831  | <i>MLH1</i>      | TSS1500 |
| cg03785076 | 2  | 241,936,915 | <i>SNED1</i>     | TSS1500 |
| cg03881775 | 3  | 147,111,135 | <i>ZIC4</i>      | TSS1500 |
| cg03900143 | 3  | 147,111,660 | <i>ZIC4</i>      | TSS1500 |
| cg03946671 | 20 | 62,693,973  | <i>TCEA2</i>     | TSS1500 |
| cg04146745 | 3  | 42,947,263  | <i>ZNF662</i>    | TSS200  |
| cg04225243 | 2  | 5,831,374   | <i>SOX11</i>     | TSS200  |
| cg04300937 | 17 | 4,981,221   | <i>ZFP3</i>      | TSS1500 |
| cg04380519 | 17 | 61,778,366  | <i>LIMD2</i>     | TSS1500 |
| cg04417677 | 7  | 150,039,105 | <i>RARRES2</i>   | TSS1500 |
| cg04553690 | 5  | 140,777,501 | <i>PCDHGB5</i>   | TSS200  |
| cg04726821 | 3  | 37,033,791  | <i>MLH1</i>      | TSS1500 |
| cg04891086 | 12 | 5,018,513   | <i>KCNA1</i>     | TSS1500 |
| cg04917181 | 8  | 98,290,229  | <i>TSPYL5</i>    | TSS200  |
| cg05158240 | 3  | 147,123,477 | <i>ZIC4</i>      | TSS200  |
| cg05159188 | 6  | 26,240,579  | <i>HIST1H4F</i>  | TSS200  |
| cg05408831 | 5  | 179,220,797 | <i>LTC4S</i>     | TSS200  |
| cg05618426 | 4  | 148,401,958 | <i>EDNRA</i>     | TSS200  |
| cg05656486 | 1  | 161,171,383 | <i>NDUFS2</i>    | TSS1500 |
| cg05670953 | 3  | 37,033,903  | <i>MLH1</i>      | TSS1500 |
| cg05771342 | 11 | 68,782,202  | <i>MARGPRF</i>   | TSS1500 |
| cg05811594 | 3  | 147,123,392 | <i>ZIC4</i>      | TSS200  |
| cg05816193 | 6  | 26,018,127  | <i>HIST1H1A</i>  | TSS200  |
| cg05845319 | 3  | 37,034,066  | <i>MLH1</i>      | TSS1500 |
| cg05886087 | 2  | 102,758,186 | <i>IL1R1</i>     | TSS200  |
| cg05970811 | 12 | 64,237,202  | <i>SRGAP1</i>    | TSS1500 |
| cg05979020 | 2  | 176,981,336 | <i>HOXD10</i>    | TSS200  |
| cg06092815 | 2  | 229,046,406 | <i>SPHKAP</i>    | TSS200  |
| cg06145435 | 7  | 1,022,769   | <i>CYP2W1</i>    | TSS200  |
| cg06157602 | 5  | 140,787,575 | <i>PCDHGB6</i>   | TSS200  |
| cg06274159 | 4  | 188,916,867 | <i>ZFP42</i>     | TSS200  |
| cg06484167 | 6  | 27,832,180  | <i>HIST1H2AL</i> | TSS1500 |
| cg06511389 | 17 | 42,092,403  | <i>TMEM101</i>   | TSS200  |
| cg06579547 | 17 | 76,922,183  | <i>TIMP2</i>     | TSS1500 |
| cg06743610 | 19 | 35,630,305  | <i>FXYD1</i>     | TSS200  |
| cg06847624 | 5  | 176,827,671 | <i>PFN3</i>      | TSS200  |
| cg07354440 | 1  | 161,168,889 | <i>NDUFS2</i>    | TSS200  |
| cg07355476 | 11 | 125,756,934 | <i>HYLS1</i>     | TSS200  |

|            |    |             |                         |         |
|------------|----|-------------|-------------------------|---------|
| cg07578826 | 2  | 229,046,410 | <i>SPHKAP</i>           | TSS200  |
| cg07599144 | 16 | 30,959,430  | <i>ORAI3</i>            | TSS1500 |
| cg07625529 | 2  | 176,981,283 | <i>HOXD10</i>           | TSS1500 |
| cg07644368 | 5  | 115,152,785 | <i>CDO1</i>             | TSS1500 |
| cg07660236 | 6  | 28,367,883  | <i>ZSCAN12</i>          | TSS1500 |
| cg07730329 | 5  | 140,810,137 | <i>PCDHGA12</i>         | TSS200  |
| cg07850418 | 3  | 147,110,378 | <i>ZIC4</i>             | TSS200  |
| cg08129583 | 2  | 127,413,367 | <i>GYPC</i>             | TSS200  |
| cg08491188 | 5  | 140,777,503 | <i>PCDHGB5</i>          | TSS200  |
| cg08526991 | 2  | 5,831,394   | <i>SOX11</i>            | TSS200  |
| cg08605326 | 17 | 50,237,401  | <i>CA10</i>             | TSS200  |
| cg08668790 | 19 | 58,220,662  | <i>ZNF154</i>           | TSS200  |
| cg08812189 | 3  | 147,110,367 | <i>ZIC4</i>             | TSS200  |
| cg08850169 | 1  | 161,171,469 | <i>NDUFS2</i>           | TSS1500 |
| cg08875705 | 12 | 6,665,330   | <i>IFFO1</i>            | TSS200  |
| cg09132480 | 19 | 57,183,342  | <i>ZNF835</i>           | TSS1500 |
| cg09178190 | 5  | 140,529,580 | <i>PCDHB6</i>           | TSS200  |
| cg09207053 | 5  | 140,800,524 | <i>PCDHGA11</i>         | TSS200  |
| cg09292826 | 1  | 45,274,032  | <i>BTBD19; TCTEX1D4</i> | TSS200  |
| cg09400475 | 1  | 45,274,055  | <i>BTBD19</i>           | TSS200  |
| cg09414673 | 7  | 1,022,797   | <i>CYP2W1</i>           | TSS200  |
| cg09465698 | 5  | 140,787,623 | <i>PCDHGB6</i>          | TSS200  |
| cg10242602 | 4  | 188,916,875 | <i>ZFP42</i>            | TSS200  |
| cg10376827 | 10 | 88,730,324  | <i>AGAP11</i>           | TSS200  |
| cg10689784 | 9  | 35,791,982  | <i>NPR2</i>             | TSS1500 |
| cg10795659 | 5  | 72,415,998  | <i>TMEM171</i>          | TSS1500 |
| cg10959353 | 2  | 229,046,515 | <i>SPHKAP</i>           | TSS200  |
| cg11108890 | 2  | 85,811,471  | <i>VAMP5</i>            | TSS200  |
| cg11152302 | 14 | 24,867,472  | <i>NYNRIN</i>           | TSS1500 |
| cg11291081 | 3  | 37,033,894  | <i>MLH1</i>             | TSS1500 |
| cg11327857 | 4  | 123,747,558 | <i>FGF2</i>             | TSS1500 |
| cg11618529 | 19 | 58,952,108  | <i>ZNF132</i>           | TSS1500 |
| cg11679069 | 13 | 43,596,577  | <i>DNAJC15</i>          | TSS1500 |
| cg11735755 | 2  | 176,981,244 | <i>HOXD10</i>           | TSS1500 |
| cg11847636 | 19 | 50,015,523  | <i>FCGRT</i>            | TSS200  |
| cg11891393 | 6  | 100,911,727 | <i>SIMI</i>             | TSS200  |
| cg12260798 | 6  | 26,240,519  | <i>HIST1H4F</i>         | TSS200  |
| cg12304520 | 5  | 140,810,123 | <i>PCDHGA12</i>         | TSS200  |
| cg12388007 | 3  | 147,110,499 | <i>ZIC4</i>             | TSS1500 |
| cg12506930 | 19 | 58,220,718  | <i>ZNF154</i>           | TSS200  |

|            |    |             |                  |         |
|------------|----|-------------|------------------|---------|
| cg12615761 | 18 | 8,608,907   | <i>RAB12</i>     | TSS1500 |
| cg12681972 | 6  | 26,225,299  | <i>HIST1H3E</i>  | TSS200  |
| cg13052034 | 1  | 66,999,238  | <i>SGIP1</i>     | TSS200  |
| cg13125157 | 17 | 50,237,403  | <i>CA10</i>      | TSS200  |
| cg13340636 | 3  | 147,110,667 | <i>ZIC4</i>      | TSS1500 |
| cg13561081 | 13 | 43,596,606  | <i>DNAJC15</i>   | TSS1500 |
| cg13734833 | 11 | 68,779,817  | <i>MRGPRF</i>    | TSS200  |
| cg13836098 | 6  | 26,225,268  | <i>HIST1H3E</i>  | TSS200  |
| cg13871633 | 3  | 42,947,385  | <i>ZNF662</i>    | TSS200  |
| cg13939745 | 2  | 208,989,405 | <i>CRYGD</i>     | TSS200  |
| cg14021880 | 2  | 27,301,369  | <i>EMILIN1</i>   | TSS200  |
| cg14209784 | 10 | 88,729,861  | <i>AGAP11</i>    | TSS1500 |
| cg14231749 | 17 | 50,237,249  | <i>CA10</i>      | TSS200  |
| cg14268839 | 15 | 74,466,809  | <i>ISLR</i>      | TSS200  |
| cg14382215 | 1  | 161,169,007 | <i>NDUFS2</i>    | TSS200  |
| cg14410016 | 2  | 176,986,659 | <i>HOXD9</i>     | TSS1500 |
| cg14423778 | 3  | 151,985,433 | <i>MBNL1</i>     | TSS1500 |
| cg14582763 | 19 | 52,956,683  | <i>ZNF578</i>    | TSS200  |
| cg14610403 | 1  | 66,998,812  | <i>SGIP1</i>     | TSS1500 |
| cg14703002 | 6  | 26,018,058  | <i>HIST1H1A</i>  | TSS200  |
| cg14708218 | 10 | 124,638,991 | <i>LOC399815</i> | TSS200  |
| cg14744898 | 5  | 72,415,900  | <i>TMEM171</i>   | TSS1500 |
| cg14817655 | 4  | 188,916,724 | <i>ZFP42</i>     | TSS200  |
| cg15066174 | 5  | 140,501,311 | <i>PCDHB4</i>    | TSS200  |
| cg15128226 | 4  | 123,747,672 | <i>FGF2</i>      | TSS200  |
| cg15418246 | 1  | 161,168,858 | <i>NDUFS2</i>    | TSS200  |
| cg15480817 | 5  | 72,416,082  | <i>TMEM171</i>   | TSS1500 |
| cg15506609 | 7  | 27,206,073  | <i>HOXA9</i>     | TSS1500 |
| cg15718581 | 4  | 188,916,581 | <i>ZFP42</i>     | TSS1500 |
| cg15741433 | 6  | 26,018,084  | <i>HIST1H1A</i>  | TSS200  |
| cg15874877 | 5  | 140,799,572 | <i>PCDHGA11</i>  | TSS1500 |
| cg16047117 | 22 | 42,470,063  | <i>FAM109B</i>   | TSS200  |
| cg16316394 | 5  | 140,805,841 | <i>PCDHGA11</i>  | TSS200  |
| cg16536329 | 5  | 178,368,185 | <i>ZNF454</i>    | TSS200  |
| cg16566400 | 11 | 119,293,869 | <i>THY1</i>      | TSS1500 |
| cg16681597 | 1  | 219,347,410 | <i>LYPLAL1</i>   | TSS200  |
| cg16708981 | 19 | 53,758,609  | <i>ZNF677</i>    | TSS1500 |
| cg16717065 | 2  | 5,831,755   | <i>SOX11</i>     | TSS1500 |
| cg16719560 | 2  | 85,811,421  | <i>VAMP5</i>     | TSS200  |
| cg16790847 | 3  | 147,123,429 | <i>ZIC4</i>      | TSS200  |

|            |    |             |                  |         |
|------------|----|-------------|------------------|---------|
| cg16937168 | 2  | 241,936,844 | <i>SNED1</i>     | TSS1500 |
| cg17003736 | 3  | 147,111,308 | <i>ZIC4</i>      | TSS1500 |
| cg17023770 | 5  | 140,624,874 | <i>PCDHB15</i>   | TSS200  |
| cg17105014 | 2  | 127,413,363 | <i>GYPC</i>      | TSS200  |
| cg17162576 | 1  | 66,999,059  | <i>SGIP1</i>     | TSS200  |
| cg17214107 | 4  | 123,747,542 | <i>FGF2</i>      | TSS1500 |
| cg17214381 | 4  | 188,916,668 | <i>ZFP42</i>     | TSS1500 |
| cg17384889 | 6  | 28,227,068  | <i>NKAPL</i>     | TSS200  |
| cg17463145 | 7  | 79,084,011  | <i>MAGI2</i>     | TSS1500 |
| cg17540545 | 19 | 35,630,355  | <i>FXYD1</i>     | TSS200  |
| cg17544586 | 6  | 73,973,412  | <i>KHDC1</i>     | TSS1500 |
| cg17692242 | 1  | 66,999,038  | <i>SGIP1</i>     | TSS1500 |
| cg17736443 | 6  | 27,783,054  | <i>HIST1H2AJ</i> | TSS1500 |
| cg17857974 | 5  | 140,800,474 | <i>PCDHGA11</i>  | TSS200  |
| cg18034737 | 4  | 188,916,865 | <i>ZFP42</i>     | TSS200  |
| cg18115040 | 2  | 176,981,328 | <i>HOXD10</i>    | TSS200  |
| cg18118262 | 5  | 140,800,424 | <i>PCDHGA11</i>  | TSS200  |
| cg18320188 | 3  | 37,033,980  | <i>MLH1</i>      | TSS1500 |
| cg18366919 | 19 | 15,344,364  | <i>EPHX3</i>     | TSS1500 |
| cg18384926 | 15 | 45,722,598  | <i>C15orf48</i>  | TSS200  |
| cg18503912 | 19 | 35,630,279  | <i>FXYD1</i>     | TSS200  |
| cg18606364 | 5  | 140,624,898 | <i>PCDHB15</i>   | TSS200  |
| cg18660345 | 20 | 35,169,539  | <i>MYL9</i>      | TSS1500 |
| cg18815343 | 6  | 28,367,644  | <i>ZSCAN12</i>   | TSS200  |
| cg18862850 | 17 | 50,237,380  | <i>CA10</i>      | TSS200  |
| cg19513321 | 2  | 85,811,432  | <i>VAMP5</i>     | TSS200  |
| cg19516404 | 3  | 147,123,475 | <i>ZIC4</i>      | TSS200  |
| cg19663224 | 5  | 140,799,541 | <i>PCDHGA11</i>  | TSS1500 |
| cg19664945 | 2  | 54,087,343  | <i>GPR75</i>     | TSS200  |
| cg19876814 | 5  | 140,261,653 | <i>PCDHA13</i>   | TSS200  |
| cg19915738 | 19 | 44,952,730  | <i>ZNF229</i>    | TSS200  |
| cg20275132 | 6  | 28,367,749  | <i>ZSCAN12</i>   | TSS1500 |
| cg20441805 | 16 | 31,483,061  | <i>TGFB111</i>   | TSS1500 |
| cg20518446 | 11 | 62,315,034  | <i>AHNAK</i>     | TSS1500 |
| cg20552747 | 17 | 50,237,576  | <i>CA10</i>      | TSS200  |
| cg20649017 | 2  | 176,980,837 | <i>HOXD10</i>    | TSS1500 |
| cg20765086 | 6  | 28,367,885  | <i>ZSCAN12</i>   | TSS1500 |
| cg20838362 | 1  | 161,168,931 | <i>NDUFS2</i>    | TSS200  |
| cg20911718 | 14 | 24,867,491  | <i>NYNRIN</i>    | TSS1500 |
| cg21063722 | 6  | 100,911,709 | <i>SIMI</i>      | TSS200  |

|                    |    |             |                 |         |
|--------------------|----|-------------|-----------------|---------|
| cg21082452         | 16 | 66,585,225  | <i>TK2</i>      | TSS1500 |
| cg21109167         | 3  | 37,034,084  | <i>MLH1</i>     | TSS1500 |
| cg21156812         | 18 | 8,608,738   | <i>RAB12</i>    | TSS1500 |
| cg21304158         | 2  | 241,937,034 | <i>SNED1</i>    | TSS1500 |
| cg21385821         | 17 | 50,237,844  | <i>CA10</i>     | TSS1500 |
| cg21550024         | 4  | 123,747,533 | <i>FGF2</i>     | TSS1500 |
| 87, cg24683623, cg | 4  | 123,747,634 | <i>FGF2</i>     | TSS1500 |
| cg21591742         | 2  | 176,980,998 | <i>HOXD10</i>   | TSS1500 |
| cg21627409         | 5  | 140,810,106 | <i>PCDHGA12</i> | TSS200  |
| cg21695771         | 19 | 36,643,932  | <i>COX7A1</i>   | TSS200  |
| cg21911021         | 19 | 58,095,011  | <i>ZIK1</i>     | TSS1500 |
| cg21974923         | 3  | 122,296,441 | <i>PARP15</i>   | TSS200  |
| cg22134923         | 11 | 62,314,874  | <i>AHNAK</i>    | TSS1500 |
| cg22203219         | 12 | 6,665,335   | <i>IFFO1</i>    | TSS200  |
| cg22319311         | 8  | 98,290,310  | <i>TSPYL5</i>   | TSS200  |
| cg22464292         | 5  | 140,777,446 | <i>PCDHGB5</i>  | TSS1500 |
| cg22510134         | 15 | 55,881,599  | <i>PYGO1</i>    | TSS1500 |
| cg22732749         | 5  | 140,624,888 | <i>PCDHB15</i>  | TSS200  |
| cg22855255         | 17 | 50,237,267  | <i>CA10</i>     | TSS200  |
| cg23002957         | 16 | 30,959,532  | <i>ORAI3</i>    | TSS1500 |
| cg23037403         | 5  | 178,368,183 | <i>ZNF454</i>   | TSS200  |
| cg23163333         | 2  | 229,046,408 | <i>SPHKAP</i>   | TSS200  |
| cg23371746         | 1  | 119,532,925 | <i>TBX15</i>    | TSS1500 |
| cg23405212         | 2  | 208,989,382 | <i>CRYGD</i>    | TSS200  |
| cg23680086         | 5  | 140,787,629 | <i>PCDHGB6</i>  | TSS200  |
| cg23737737         | 12 | 6,665,370   | <i>IFFO1</i>    | TSS200  |
| cg23792314         | 12 | 25,056,243  | <i>BCAT1</i>    | TSS1500 |
| cg23829024         | 6  | 26,018,074  | <i>HIST1H1A</i> | TSS200  |
| cg23837265         | 10 | 88,730,407  | <i>AGAP11</i>   | TSS200  |
| cg24049880         | 1  | 161,171,211 | <i>NDUFS2</i>   | TSS1500 |
| cg24503966         | 18 | 31,803,678  | <i>NOLA</i>     | TSS200  |
| cg24683623         | 4  | 123,747,447 | <i>FGF2</i>     | TSS1500 |
| cg24745495         | 19 | 15,344,239  | <i>EPHX3</i>    | TSS1500 |
| cg24779381         | 15 | 74,466,794  | <i>ISLR</i>     | TSS200  |
| cg24843380         | 5  | 178,367,827 | <i>ZNF454</i>   | TSS1500 |
| cg24896649         | 4  | 188,916,726 | <i>ZFP42</i>    | TSS200  |
| cg24918705         | 5  | 140,501,321 | <i>PCDHB4</i>   | TSS200  |
| cg25060829         | 6  | 28,367,571  | <i>ZSCAN12</i>  | TSS200  |
| cg25156646         | 19 | 36,523,600  | <i>CLIP3</i>    | TSS200  |
| cg25194918         | 2  | 5,831,370   | <i>SOX11</i>    | TSS200  |

|            |    |             |                 |         |
|------------|----|-------------|-----------------|---------|
| cg25340966 | 1  | 119,532,195 | <i>TBX15</i>    | TSS200  |
| cg25362339 | 2  | 85,811,413  | <i>VAMP5</i>    | TSS200  |
| cg25390440 | 2  | 127,413,369 | <i>GYPC</i>     | TSS200  |
| cg25429719 | 2  | 208,989,324 | <i>CRYGD</i>    | TSS200  |
| cg25754158 | 5  | 140,235,442 | <i>PCDHA10</i>  | TSS200  |
| cg25967418 | 5  | 140,261,759 | <i>PCDHA13</i>  | TSS200  |
| cg25999578 | 7  | 27,205,514  | <i>HOXA9</i>    | TSS1500 |
| cg26010734 | 19 | 15,344,046  | <i>EPHX3</i>    | TSS200  |
| cg26092675 | 6  | 26,225,258  | <i>HIST1H3E</i> | TSS200  |
| cg26149875 | 6  | 26,225,282  | <i>HIST1H3E</i> | TSS200  |
| cg26212328 | 12 | 46,767,665  | <i>SLC38A2</i>  | TSS1500 |
| cg26356061 | 19 | 58,446,960  | <i>ZNF418</i>   | TSS1500 |
| cg26465391 | 19 | 58,220,773  | <i>ZNF154</i>   | TSS200  |
| cg26647197 | 5  | 140,800,398 | <i>PCDHGA11</i> | TSS200  |
| cg26800986 | 15 | 74,466,704  | <i>ISLR</i>     | TSS200  |
| cg27085869 | 5  | 72,416,202  | <i>TMEM171</i>  | TSS200  |
| cg27507960 | 6  | 26,225,246  | <i>HIST1H3E</i> | TSS200  |
| cg27558095 | 1  | 66,999,588  | <i>SGIP1</i>    | TSS200  |
| cg27606499 | 3  | 147,111,120 | <i>ZIC4</i>     | TSS1500 |

<sup>a</sup>Probe ID of the Infinium MethylationEPIC BeadChip. <sup>b</sup>National Center for Biotechnology Information (NCBI) database (Genome Build 37). <sup>c</sup>N/A, not annotated (designed for the intergenic regions). <sup>d</sup>Probe CpG sites were annotated as the region from 200 bp upstream of the transcription start site (TSS) to 1500 bp upstream of it (TSS1500) and the region from TSS to 200 bp upstream of TSS (TSS200) based on the RefSeq database (<http://www.ncbi.nlm.nih.gov/refseq/>).
