# Supplementary material for: Genome-wide DNA methylation profile of early-onset endometrial cancer: its correlation with genetic aberrations and comparison with late-onset endometrial cancer
Source: PubMed Central journal article supplement — Carcinogenesis. 2019 Mar 9;40(5):611–23. doi: 10.1093/carcin/bgz046 (PMC6610171; doi:10.1093/carcin/bgz046), 2019-03-09
Supplement: bgz046_suppl_supplementary_table_s9b.pdf [file bgz046_suppl_supplementary_table_s9b.pdf]

**Supplementary Table 9B.** Gene ontology enrichment analysis (GO protein function) of the 101 genes, for which the 255 probes belonging to Probe Cluster I and showing significant ( $P < 0.05$ ) inverse correlation ( $r < -0.2$ ) between DNA methylation levels and the mRNA expression levels in the endometrial cancer dataset deposited in The Cancer Genome Atlas database (<https://tcgadata.nci.nih.gov/tcga/>) were designed, using MetaCore software.

| Protein class         | r  | n  | R     | N     | Expected | Ratio | <i>P</i>                                |
|-----------------------|----|----|-------|-------|----------|-------|-----------------------------------------|
| Transcription factors | 10 | 96 | 1220  | 40065 | 2.92     | 3.42  | <u><math>6.97 \times 10^{-4}</math></u> |
| Ligands               | 3  | 96 | 536   | 40065 | 1.28     | 2.34  | $1.38 \times 10^{-1}$                   |
| Receptors             | 6  | 96 | 1701  | 40065 | 4.08     | 1.47  | $2.23 \times 10^{-1}$                   |
| Enzymes               | 11 | 96 | 2853  | 40065 | 6.84     | 1.61  | $7.94 \times 10^{-2}$                   |
| Kinases               | 1  | 96 | 680   | 40065 | 1.63     | 0.61  | $5.14 \times 10^{-1}$                   |
| Other                 | 65 | 96 | 32295 | 40065 | 77.38    | 0.84  | $1.85 \times 10^{-3}$                   |

r, number of objects from the present data set for a given protein class; n, total number of objects from the present data set; R, number of background objects from the database for a given class; N, total number of background objects from the database; Expected, mean value for hypergeometric distribution ( $n \times R/38526$ ); Ratio, the ratio of actual/expected. If the ratio is more than 1,  $P < 0.05$  means significant enrichment, and these are underlined.
