# Supplementary material for: Genome-wide DNA methylation profile of early-onset endometrial cancer: its correlation with genetic aberrations and comparison with late-onset endometrial cancer
Source: PubMed Central journal article supplement — Carcinogenesis. 2019 Mar 9;40(5):611–23. doi: 10.1093/carcin/bgz046 (PMC6610171; doi:10.1093/carcin/bgz046), 2019-03-09
Supplement: bgz046_suppl_supplementary_table_s9c.pdf [file bgz046_suppl_supplementary_table_s9c.pdf]

**Supplementary Table 9C.** Statistically significant GO molecular functions revealed by MetaCore software analysis using the 101 genes, for which the 255 probes belonging to Probe Cluster I and showing significant ( $P < 0.05$ ) inverse correlation ( $r < -0.2$ ) between DNA methylation levels and the mRNA expression levels in the endometrial cancer dataset deposited in The Cancer Genome Atlas database (<https://tcgadata.nci.nih.gov/tcga/>) were designed.

| Molecular functions                                                                | <i>P</i> value        |
|------------------------------------------------------------------------------------|-----------------------|
| DNA binding                                                                        | $5.91 \times 10^{-6}$ |
| transcription regulator activity                                                   | $1.50 \times 10^{-5}$ |
| DNA binding transcription factor activity                                          | $2.95 \times 10^{-5}$ |
| RNA polymerase II transcription factor activity, sequence-specific DNA binding     | $5.58 \times 10^{-5}$ |
| calcium ion binding                                                                | $6.12 \times 10^{-4}$ |
| nucleic acid binding                                                               | $9.13 \times 10^{-4}$ |
| cell adhesion molecule binding                                                     | $3.14 \times 10^{-3}$ |
| structural molecule activity conferring elasticity                                 | $3.23 \times 10^{-3}$ |
| electron transfer activity                                                         | $4.33 \times 10^{-3}$ |
| integrin binding                                                                   | $4.33 \times 10^{-3}$ |
| binding                                                                            | $4.38 \times 10^{-3}$ |
| cysteine dioxygenase activity                                                      | $4.48 \times 10^{-3}$ |
| transcriptional repressor activity, RNA polymerase II transcription factor binding | $6.47 \times 10^{-3}$ |
| glycolipid binding                                                                 | $7.45 \times 10^{-3}$ |
| metal ion binding                                                                  | $8.21 \times 10^{-3}$ |
| thymidine kinase activity                                                          | $8.94 \times 10^{-3}$ |
| branched-chain-amino-acid transaminase activity                                    | $8.94 \times 10^{-3}$ |
| L-leucine transaminase activity                                                    | $8.94 \times 10^{-3}$ |
| L-isoleucine transaminase activity                                                 | $8.94 \times 10^{-3}$ |
| L-valine transaminase activity                                                     | $8.94 \times 10^{-3}$ |
| integrin binding involved in cell-matrix adhesion                                  | $8.94 \times 10^{-3}$ |
| interleukin-1, Type I, activating receptor activity                                | $8.94 \times 10^{-3}$ |
| deoxycytidine kinase activity                                                      | $8.94 \times 10^{-3}$ |
| heme-copper terminal oxidase activity                                              | $9.02 \times 10^{-3}$ |
| cytochrome-c oxidase activity                                                      | $9.02 \times 10^{-3}$ |
| oxidoreductase activity, acting on a heme group of donors, oxygen as acceptor      | $9.02 \times 10^{-3}$ |
| oxidoreductase activity, acting on a heme group of donors                          | $9.57 \times 10^{-3}$ |
| cation binding                                                                     | 0.012                 |
| endothelin receptor activity                                                       | 0.013                 |
| type II activin receptor binding                                                   | 0.013                 |
| natriuretic peptide receptor activity                                              | 0.013                 |
| ion binding                                                                        | 0.015                 |
| guanine/thymine mispair binding                                                    | 0.018                 |
| ganglioside binding                                                                | 0.018                 |
| deoxynucleoside kinase activity                                                    | 0.018                 |
| leukotriene-C4 synthase activity                                                   | 0.018                 |

|                                                        |       |
|--------------------------------------------------------|-------|
| beta-1 adrenergic receptor binding                     | 0.018 |
| heterocyclic compound binding                          | 0.021 |
| IgG receptor activity                                  | 0.022 |
| regulatory region RNA binding                          | 0.022 |
| receptor-receptor interaction                          | 0.022 |
| Roundabout binding                                     | 0.022 |
| L-glutamine transmembrane transporter activity         | 0.027 |
| organic cyclic compound binding                        | 0.027 |
| cell-matrix adhesion mediator activity                 | 0.031 |
| extracellular matrix constituent conferring elasticity | 0.031 |
| epoxide hydrolase activity                             | 0.031 |
| peptide receptor activity                              | 0.033 |
| protein heterodimerization activity                    | 0.035 |
| MutSalpha complex binding                              | 0.035 |
| interleukin-1 receptor activity                        | 0.035 |
| GPI anchor binding                                     | 0.040 |
| ceramide binding                                       | 0.044 |
| NAD binding                                            | 0.046 |
| myosin binding                                         | 0.047 |
| activin receptor binding                               | 0.048 |
| immunoglobulin receptor activity                       | 0.048 |
| mismatch repair complex binding                        | 0.048 |
| I-SMAD binding                                         | 0.048 |

---
