# Supplementary material for: Genome-wide DNA methylation profile of early-onset endometrial cancer: its correlation with genetic aberrations and comparison with late-onset endometrial cancer
Source: PubMed Central journal article supplement — Carcinogenesis. 2019 Mar 9;40(5):611–23. doi: 10.1093/carcin/bgz046 (PMC6610171; doi:10.1093/carcin/bgz046), 2019-03-09
Supplement: bgz046_suppl_supplementary_table_s10.pdf [file bgz046_suppl_supplementary_table_s10.pdf]

**Supplementary Table S10.** Genes for which DNA methylation levels were significantly correlated with lymphovascular invasion (LVSI) in tissue samples of early-onset endometrioid endometrial cancer (n=34).

| Target ID <sup>a</sup> | Gene symbol <sup>b</sup> | DNA methylation levels in EE samples (mean $\pm$ SD) |                      | P value                        | DNA methylation status in LVSI-positive cases <sup>c</sup> |
|------------------------|--------------------------|------------------------------------------------------|----------------------|--------------------------------|------------------------------------------------------------|
|                        |                          | LVSI-positive (n=5)                                  | LVSI-negative (n=29) |                                |                                                            |
| cg22855255             | <i>CA10</i>              | 0.639 $\pm$ 0.127                                    | 0.480 $\pm$ 0.182    | 7.22 $\times$ 10 <sup>-3</sup> | DNA hypermethylation                                       |
| cg14231749             | <i>CA10</i>              | 0.544 $\pm$ 0.108                                    | 0.374 $\pm$ 0.171    | 1.69 $\times$ 10 <sup>-3</sup> | DNA hypermethylation                                       |
| cg21385821             | <i>CA10</i>              | 0.534 $\pm$ 0.153                                    | 0.341 $\pm$ 0.161    | 2.97 $\times$ 10 <sup>-3</sup> | DNA hypermethylation                                       |
| cg00701946             | <i>GPR75</i>             | 0.695 $\pm$ 0.131                                    | 0.544 $\pm$ 0.173    | 9.88 $\times$ 10 <sup>-3</sup> | DNA hypermethylation                                       |
| cg25390440             | <i>GYPC</i>              | 0.660 $\pm$ 0.092                                    | 0.546 $\pm$ 0.132    | 8.23 $\times$ 10 <sup>-3</sup> | DNA hypermethylation                                       |
| cg08129583             | <i>GYPC</i>              | 0.677 $\pm$ 0.085                                    | 0.559 $\pm$ 0.112    | 2.45 $\times$ 10 <sup>-3</sup> | DNA hypermethylation                                       |
| cg17105014             | <i>GYPC</i>              | 0.646 $\pm$ 0.087                                    | 0.539 $\pm$ 0.109    | 5.50 $\times$ 10 <sup>-3</sup> | DNA hypermethylation                                       |
| cg01285501             | <i>HOXA9</i>             | 0.676 $\pm$ 0.101                                    | 0.537 $\pm$ 0.178    | 8.37 $\times$ 10 <sup>-3</sup> | DNA hypermethylation                                       |
| cg20649017             | <i>HOXD10</i>            | 0.648 $\pm$ 0.128                                    | 0.520 $\pm$ 0.144    | 5.93 $\times$ 10 <sup>-3</sup> | DNA hypermethylation                                       |
| cg21591742             | <i>HOXD10</i>            | 0.691 $\pm$ 0.086                                    | 0.520 $\pm$ 0.196    | 1.81 $\times$ 10 <sup>-3</sup> | DNA hypermethylation                                       |
| cg00983904             | <i>IFFO1</i>             | 0.764 $\pm$ 0.055                                    | 0.682 $\pm$ 0.108    | 8.00 $\times$ 10 <sup>-3</sup> | DNA hypermethylation                                       |
| cg10689784             | <i>NPR2</i>              | 0.554 $\pm$ 0.184                                    | 0.368 $\pm$ 0.144    | 9.16 $\times$ 10 <sup>-3</sup> | DNA hypermethylation                                       |
| cg23002957             | <i>ORAI3</i>             | 0.697 $\pm$ 0.063                                    | 0.560 $\pm$ 0.118    | 1.48 $\times$ 10 <sup>-4</sup> | DNA hypermethylation                                       |
| cg22732749             | <i>PCDHB15</i>           | 0.630 $\pm$ 0.130                                    | 0.454 $\pm$ 0.200    | 5.30 $\times$ 10 <sup>-3</sup> | DNA hypermethylation                                       |
| cg17023770             | <i>PCDHB15</i>           | 0.613 $\pm$ 0.107                                    | 0.453 $\pm$ 0.145    | 1.39 $\times$ 10 <sup>-3</sup> | DNA hypermethylation                                       |
| cg09207053             | <i>PCDHGA11</i>          | 0.680 $\pm$ 0.102                                    | 0.544 $\pm$ 0.141    | 4.07 $\times$ 10 <sup>-3</sup> | DNA hypermethylation                                       |
| cg06157602             | <i>PCDHGB6</i>           | 0.580 $\pm$ 0.147                                    | 0.416 $\pm$ 0.165    | 8.37 $\times$ 10 <sup>-3</sup> | DNA hypermethylation                                       |
| cg01560972             | <i>RIC3</i>              | 0.574 $\pm$ 0.068                                    | 0.459 $\pm$ 0.146    | 5.15 $\times$ 10 <sup>-3</sup> | DNA hypermethylation                                       |
| cg16717065             | <i>SOX11</i>             | 0.641 $\pm$ 0.130                                    | 0.420 $\pm$ 0.202    | 7.70 $\times$ 10 <sup>-4</sup> | DNA hypermethylation                                       |
| cg06092815             | <i>SPHKAP</i>            | 0.612 $\pm$ 0.104                                    | 0.477 $\pm$ 0.156    | 6.61 $\times$ 10 <sup>-3</sup> | DNA hypermethylation                                       |
| cg21911021             | <i>ZIK1</i>              | 0.595 $\pm$ 0.142                                    | 0.433 $\pm$ 0.150    | 6.15 $\times$ 10 <sup>-3</sup> | DNA hypermethylation                                       |
| cg26465391             | <i>ZNF154</i>            | 0.737 $\pm$ 0.084                                    | 0.602 $\pm$ 0.161    | 4.55 $\times$ 10 <sup>-3</sup> | DNA hypermethylation                                       |
| cg13871633             | <i>ZNF662</i>            | 0.671 $\pm$ 0.105                                    | 0.477 $\pm$ 0.138    | 1.25 $\times$ 10 <sup>-4</sup> | DNA hypermethylation                                       |
| cg20765086             | <i>ZSCAN12</i>           | 0.671 $\pm$ 0.080                                    | 0.540 $\pm$ 0.152    | 3.05 $\times$ 10 <sup>-3</sup> | DNA hypermethylation                                       |

<sup>a</sup>Probe ID of the Infinium MethylationEPIC BeadChip. <sup>b</sup>National Center for Biotechnology Information (NCBI) database (Genome Build 37). <sup>c</sup>Compared to DNA methylation status in LVSI-negative cases.
