# Supplementary material for: Genome-wide DNA methylation profile of early-onset endometrial cancer: its correlation with genetic aberrations and comparison with late-onset endometrial cancer
Source: PubMed Central journal article supplement — Carcinogenesis. 2019 Mar 9;40(5):611–23. doi: 10.1093/carcin/bgz046 (PMC6610171; doi:10.1093/carcin/bgz046), 2019-03-09
Supplement: bgz046_suppl_supplementary_table_s11.pdf [file bgz046_suppl_supplementary_table_s11.pdf]

**Supplementary Table 11.** The 11 probes showing an area under the curve value of 1 in receiver operating characteristic curve analysis for discriminating 12 samples belonging to Cluster EB from 22 samples belonging to Cluster EA.

| Target ID <sup>a</sup> | Chromosome | Position <sup>b</sup> | Gene symbol <sup>c</sup> | Gene region <sup>d</sup>   | CpG type <sup>e</sup> |
|------------------------|------------|-----------------------|--------------------------|----------------------------|-----------------------|
| cg02320740             | 10         | 106,400,259           | <i>SORCS3</i>            | TSS1500                    | Island                |
| cg06248767             | 8          | 56,852,290            | <i>LYN</i>               | Gene body/5'UTR/1st intron | Open sea              |
| cg13539545             | 14         | 60,973,823            | <i>N/A</i>               |                            | N Shore/Island        |
| cg13997680             | 6          | 28,226,980            | <i>ZKSCAN4</i>           | Gene body/5'UTR/1st exon   | Island                |
| cg23049458             | 1          | 62,660,624            | <i>LITD1</i>             | Gene body/5'UTR/1st intron | Island                |
| cg24452128             | 6          | 10,390,919            | <i>N/A</i>               |                            | S Shore/Island        |
| cg12197571             | 21         | 31,972,506            | <i>KRTAP22-1</i>         | TSS1500                    | Open sea              |
| cg14269191             | 11         | 5,346,249             | <i>OR51B2</i>            | TSS1500                    | Open sea              |
| cg26980111             | 8          | 132,321,917           | <i>N/A</i>               |                            | Open sea              |
| cg02065293             | 2          | 1,928,480             | <i>MYTIL</i>             | Gene body                  | Open sea              |
| cg05353872             | 1          | 248,366,399           | <i>OR2M3</i>             | GeneBody/1st exon          | Open sea              |

<sup>a</sup>Probe ID of the Infinium MethylationEPIC BeadChip. <sup>b</sup>National Center for Biotechnology Information (NCBI) database (Genome Build 37). <sup>c</sup>N/A, not annotated (designed for the intergenic regions). <sup>d</sup>Probe CpG sites were annotated as (a) from 200 bp upstream of the transcription start site (TSS) to 1500 bp upstream of it (TSS1500), (b) from TSS to 200 bp upstream of TSS (TSS200), (c) the 5' untranslated region (UTR), (d) the first exon, (e) the first intron, (f) the gene body (TSS to transcription termination site), (g) the 3' UTR and (h) the intergenic region based on the RefSeq database (<http://www.ncbi.nlm.nih.gov/refseq/>). <sup>e</sup>Probe CpG type were also categorized into CpG island, (j) N-Shelf (2000 bp region 5' adjacent to N-Shore), (k) N-Shore (2000 bp region 5' adjacent to CpG island), (l) S-Shore (2000 bp region 3' adjacent to CpG island), (m) S-Shelf (2000 bp region 3' adjacent to S-Shore) and (n) open sea based on the UCSC Genome Browser (<https://genome.ucsc.edu/>).
