# Supplementary material for: Genome-wide DNA methylation profile of early-onset endometrial cancer: its correlation with genetic aberrations and comparison with late-onset endometrial cancer
Source: PubMed Central journal article supplement — Carcinogenesis. 2019 Mar 9;40(5):611–23. doi: 10.1093/carcin/bgz046 (PMC6610171; doi:10.1093/carcin/bgz046), 2019-03-09
Supplement: bgz046_suppl_supplementary_table_s12.pdf [file bgz046_suppl_supplementary_table_s12.pdf]

Supplementary Table 12. Receiver operating characteristic curve analysis using the 11 CpG sites shown in Figure 5 for discriminating samples belonging to Cluster A (n=58) from samples belonging to Cluster B (n=16).

| Probe ID   | Area under the curve value | Youden index | Sensitivity | Specificity |
|------------|----------------------------|--------------|-------------|-------------|
| cg02065293 | 0.94                       | 0.56         | 0.86        | 0.94        |
| cg02320740 | 0.98                       | 0.41         | 0.90        | 1.00        |
| cg05353872 | 0.96                       | 0.51         | 0.91        | 0.94        |
| cg06248767 | 0.96                       | 0.60         | 0.86        | 1.00        |
| cg12197571 | 0.97                       | 0.62         | 0.95        | 0.94        |
| cg13539545 | 0.98                       | 0.61         | 0.97        | 0.94        |
| cg13997680 | 0.99                       | 0.49         | 0.98        | 1.00        |
| cg14269191 | 0.96                       | 0.53         | 0.95        | 0.94        |
| cg23049458 | 0.99                       | 0.58         | 0.95        | 1.00        |
| cg24452128 | 0.99                       | 0.50         | 0.93        | 1.00        |
| cg26980111 | 0.95                       | 0.45         | 0.81        | 1.00        |
